# Supplementary material for: Genome-wide transcriptomic analysis identifies candidate genes involved in jasmonic acid-mediated salt tolerance of alfalfa
Source: PeerJ. 2023 May 5;11:e15324. doi: 10.7717/peerj.15324 (PMC10166079; doi:10.7717/peerj.15324)
Supplement: Supplemental Information 2 [file peerj-11-15324-s002.xlsx]

## Sheet: Sheet1
ID	C1_fpkm	C2_fpkm	C3_fpkm	J1_fpkm	J2_fpkm	J3_fpkm	S1_fpkm	S2_fpkm	S3_fpkm	JS1_fpkm	JS2_fpkm	JS3_fpkm	C1_count	C2_count	C3_count	J1_count	J2_count	J3_count	S1_count	S2_count	S3_count	JS1_count	JS2_count	JS3_count	chr	start	end	strand	gene_name	gene_description	KEGG	KEGG pathway	NR	Swissprot	KOG	GO	Pfam	TF-Family	TF-Category	TF-Classification
MS.gene000014	0.06	0.1	0.05	0.23	0.71	0.18	2.32	0.16	0.27	0.32	0.53	0	3	5	3	12	35	9	110	8	13	15	28	0	chr3.3	16873632	16904965	-	--	--	K18663 activating signal cointegrator complex subunit 3 [EC:3.6.4.12] | (GenBank) U5 small nuclear ribonucleoprotein helicase (A)	--	XP_003598950.2	DEXHE_ARATH RecName: Full=DExH-box ATP-dependent RNA helicase DExH14 {ECO:0000305}; EC=3.6.4.13 {ECO:0000305}; AltName: Full=BRR2 homolog C {ECO:0000305}; Short=AtBRR2C {ECO:0000305}; AltName: Full=Pre-mRNA-splicing helicase BRR2C {ECO:0000305};	At5g61140	GO:0005634,nucleus; GO:0005681,spliceosomal complex; GO:0043138,3'-5' DNA helicase activity; GO:0005524,ATP binding; GO:0003729,mRNA binding; GO:0003723,RNA binding; GO:0003724,RNA helicase activity; GO:0006397,mRNA processing; GO:0008380,RNA splicing; GO:0003674,molecular_function; GO:0003678,DNA helicase activity; GO:0003824,catalytic activity; GO:0017111,nucleoside-triphosphatase activity; GO:…	PF02889.16:Sec63 Brl domain	--	--	--
MS.gene000047	0.29	0.65	1.18	0.52	1.22	0.92	3.95	4.98	4.98	2.12	2.55	22.87	2	5	10	4	9	7	28	38	36	15	20	148	chr3.1	24810032	24810961	+	--	--	--	--	XP_003599116.1	U496D_ORYSJ RecName: Full=UPF0496 protein 4;	At1g01550	GO:0016021,integral component of membrane; GO:0005575,cellular_component; GO:0016020,membrane; GO:0031224,intrinsic component of membrane; GO:0044425,membrane part	PF05633.11:Protein BYPASS1-related	--	--	--
MS.gene000074	7.75	5.86	5.64	0.51	1.25	2.06	9.16	15.2	14.31	2.4	3.43	2.23	82	69	73	6	14	24	99	177	158	26	41	22	chr2.3	52532548	52538683	+	--	--	K22733 magnesium transporter | (RefSeq) probable magnesium transporter NIPA4 (A)	--	XP_013463390.1	--	At3g54070	GO:0016021,integral component of membrane; GO:0016020,membrane; GO:0005575,cellular_component; GO:0031224,intrinsic component of membrane; GO:0044425,membrane part	PF12796.7:Ankyrin repeats (3 copies)	--	--	--
MS.gene000078	5.77	3.78	1.59	0.35	0.29	0.5	3.89	3.26	9.63	1.37	1.24	0.92	74	54	25	5	4	7	51	46	129	18	18	11	chr2.3	52591383	52593516	+	--	--	K20890 xylan alpha-glucuronosyltransferase [EC:2.4.1.-] | (RefSeq) UDP-glucuronate:xylan alpha-glucuronosyltransferase 1-like (A)	--	XP_013463390.1	--	At3g54070	GO:0016021,integral component of membrane; GO:0016020,membrane; GO:0005575,cellular_component; GO:0031224,intrinsic component of membrane; GO:0044425,membrane part	PF13962.6:Domain of unknown function	--	--	--
MS.gene000139	96.35	76.48	48.37	99.21	103.98	63.53	129.71	329.35	280.15	438.34	242.87	67.35	1146	1013	704	1312	1314	831	1577	4313	3478	5331	3264	748	chr5.4	1878407	1882893	-	--	--	K24193 MFS transporter, SP family, sugar:H+ symporter | (GenBank) sugar porter (SP) family MFS transporter (A)	--	XP_003610701.1	STP13_ARATH RecName: Full=Sugar transport protein 13; AltName: Full=Hexose transporter 13; AltName: Full=Multicopy suppressor of snf4 deficiency protein 1;	At5g26340	GO:0016021,integral component of membrane; GO:0005886,plasma membrane; GO:0009506,plasmodesma; GO:0009536,plastid; GO:0009679,hexose:proton symporter activity; GO:0005358,high-affinity glucose:proton symporter activity; GO:0015145,monosaccharide transmembrane transporter activity; GO:0015749,monosaccharide transmembrane transport; GO:0009737,response to abscisic acid; GO:0009651,response to salt …	PF00083.24:Sugar (and other) transporter	--	--	--
MS.gene000140	1.07	0.86	0	0.58	2.81	3.59	7.73	2.81	5.01	2.61	2.93	0	10	9	0	6	28	37	74	29	49	25	31	0	chr5.4	1908347	1913366	-	--	--	K21248 vacuole membrane protein 1 | (GenBank) vacuole membrane-like protein (A)	--	XP_003610704.1	KMS1_ARATH RecName: Full=Vacuole membrane protein KMS1 {ECO:0000303|PubMed:21294794}; AltName: Full=Protein KILLING ME SLOWLY 1 {ECO:0000303|PubMed:21294794};	At1g05360	GO:0012505,endomembrane system; GO:0005783,endoplasmic reticulum; GO:0005789,endoplasmic reticulum membrane; GO:0016021,integral component of membrane; GO:0016020,membrane; GO:0010256,endomembrane system organization; GO:0016192,vesicle-mediated transport; GO:0008150,biological_process; GO:0009987,cellular process; GO:0016043,cellular component organization; GO:0071840,cellular component organiza…	PF09335.11:SNARE associated Golgi protein	--	--	--
MS.gene000176	10.36	26.45	4.9	27.47	13.35	18.35	42.69	32.2	44.94	109.89	66.14	365.13	19	54	11	56	26	37	80	65	86	206	137	625	chr2.1	33834629	33834874	+	--	--	--	--	XP_013464148.1	--	At2g31940	GO:0016021,integral component of membrane; GO:0005575,cellular_component; GO:0016020,membrane; GO:0031224,intrinsic component of membrane; GO:0044425,membrane part	--	--	--	--
MS.gene000218	4.17	5.42	8.58	0.91	0.41	0.65	2.53	2.09	4.13	1.41	3.95	0	29	42	73	7	3	5	18	16	30	10	31	0	chr6.3	26328315	26333653	-	--	--	K20557 transcription factor VIP1 | (GenBank) bZIP transcription factor (A)	ko04016: MAPK signaling pathway - plant	XP_013451804.1	VIP1_ARATH RecName: Full=Transcription factor VIP1 {ECO:0000305}; AltName: Full=Protein SULPHATE UTILIZATION EFFICIENCY 3 {ECO:0000303|PubMed:20547563}; AltName: Full=VirE2-interacting protein 1 {ECO:0000303|PubMed:11432846}; Short=AtVIP1 {ECO:0000303|PubMed:11432846}; AltName: Full=bZIP transcription factor 51 {ECO:0000303|PubMed:11906833}; Short=AtbZIP51 {ECO:0000303|PubMed:11906833}; Short=bZI…	At1g43700	GO:0005829,cytosol; GO:0005634,nucleus; GO:0003682,chromatin binding; GO:0003700,DNA-binding transcription factor activity; GO:0051019,mitogen-activated protein kinase binding; GO:0003676,nucleic acid binding; GO:0043621,protein self-association; GO:0043565,sequence-specific DNA binding; GO:0000976,transcription regulatory region sequence-specific DNA binding; GO:0009970,cellular response to sulf…	PF00170.21:bZIP transcription factor	bZIP	TF	bZIP
MS.gene000231	31.7	10.62	9.24	0.46	0.16	4.52	1.68	0	0.82	0.84	0.45	0	185	69	66	3	1	29	10	0	5	5	3	0	chr2.3	23291709	23297245	+	--	--	K05658 ATP-binding cassette, subfamily B (MDR/TAP), member 1 [EC:7.6.2.2] | (RefSeq) uncharacterized protein LOC111781709 (A)	ko02010: ABC transporters	XP_013464484.1	SRG1_ARATH RecName: Full=Protein SRG1; Short=AtSRG1; AltName: Full=Protein SENESCENCE-RELATED GENE 1;	At1g17020	GO:0046872,metal ion binding; GO:0016682,oxidoreductase activity, acting on diphenols and related substances as donors, oxygen as acceptor; GO:0010150,leaf senescence; GO:0003674,molecular_function; GO:0005488,binding; GO:0043167,ion binding; GO:0043169,cation binding; GO:0003824,catalytic activity; GO:0016491,oxidoreductase activity; GO:0016679,oxidoreductase activity, acting on diphenols and re…	PF03171.20:2OG-Fe(II) oxygenase superfamily	--	--	--
MS.gene000238	6.95	15.97	13.85	114.19	16.47	14.15	37.51	44.66	34.87	87.76	31.96	15.17	25	64	61	457	63	56	138	177	131	323	130	51	chr2.3	23058431	23058996	+	--	--	--	--	XP_013464494.1	KI106_MEDTR RecName: Full=Kunitz type trypsin inhibitor 106 {ECO:0000303|PubMed:23662629}; Flags: Precursor;	At1g73260	GO:0048046,apoplast; GO:0005615,extracellular space; GO:0004867,serine-type endopeptidase inhibitor activity; GO:0036377,arbuscular mycorrhizal association; GO:0009610,response to symbiotic fungus; GO:0003674,molecular_function; GO:0004857,enzyme inhibitor activity; GO:0004866,endopeptidase inhibitor activity; GO:0061135,endopeptidase regulator activity; GO:0098772,molecular function regulator; G…	PF00197.18:Trypsin and protease inhibitor	--	--	--
MS.gene000257	0	0	0	0	0	0	0.42	3.48	14.69	9.58	1.51	0	0	0	0	0	0	0	1	9	36	23	4	0	chr8.3	81971131	81971523	-	--	--	--	--	XP_003626688.1	--	At3g60520	--	--	--	--	--
MS.gene000300	0	0.92	1.67	1.23	3.85	3.72	11	11.75	5.87	1.67	4.22	5.47	0	3	6	4	12	12	33	38	18	5	14	15	20850	123570	124215	+	--	--	K17279 receptor expression-enhancing protein 5/6 | (GenBank) TB2/DP1, HVA22 family protein (A)	--	XP_003602788.1	HA22E_ARATH RecName: Full=HVA22-like protein e; Short=AtHVA22e;	At5g50720	GO:0016021,integral component of membrane; GO:0042538,hyperosmotic salinity response; GO:0009737,response to abscisic acid; GO:0009409,response to cold; GO:0009414,response to water deprivation; GO:0006950,response to stress; GO:0006970,response to osmotic stress; GO:0006972,hyperosmotic response; GO:0008150,biological_process; GO:0009628,response to abiotic stimulus; GO:0009651,response to salt …	PF03134.19:TB2/DP1, HVA22 family	--	--	--
MS.gene000405	11.28	6.36	7.27	5.78	8.22	5.32	1.77	9.73	9.47	0.64	0.73	0.09	137	86	108	78	106	71	22	130	120	8	10	1	chr4.3	7370986	7374601	+	--	--	K08054 calnexin | (GenBank) Calnexin 2 (A)	ko04141: Protein processing in endoplasmic reticulum; ko04145: Phagosome	XP_003630450.1	CALX_SOYBN RecName: Full=Calnexin homolog; Flags: Precursor;	At5g61790	GO:0005789,endoplasmic reticulum membrane; GO:0016021,integral component of membrane; GO:0005509,calcium ion binding; GO:0030246,carbohydrate binding; GO:0051082,unfolded protein binding; GO:0030968,endoplasmic reticulum unfolded protein response; GO:0006457,protein folding; GO:0003674,molecular_function; GO:0005488,binding; GO:0046872,metal ion binding; GO:0043167,ion binding; GO:0043169,cation …	PF00262.18:Calreticulin family	--	--	--
MS.gene000473	170.65	129.14	174.9	300.17	17.49	41.92	46.45	45	11.21	57.88	53.59	92.86	248	209	311	485	27	67	69	72	17	86	88	126	56990	66970	67258	-	--	--	K03945 NADH dehydrogenase (ubiquinone) 1 alpha subcomplex subunit 1 | (GenBank) NADH dehydrogenase [ubiquinone] 1 alpha subcomplex subunit 1 (A)	ko00190: Oxidative phosphorylation; ko01100: Metabolic pathways	XP_003626648.1	NDUA1_ARATH RecName: Full=NADH dehydrogenase [ubiquinone] 1 alpha subcomplex subunit 1;	At3g08610	GO:0016021,integral component of membrane; GO:0005747,mitochondrial respiratory chain complex I; GO:0005739,mitochondrion; GO:0005575,cellular_component; GO:0016020,membrane; GO:0031224,intrinsic component of membrane; GO:0044425,membrane part; GO:0005622,intracellular; GO:0005623,cell; GO:0005737,cytoplasm; GO:0005740,mitochondrial envelope; GO:0005743,mitochondrial inner membrane; GO:0005746,mi…	PF15879.5:NADH-ubiquinone oxidoreductase MWFE subunit	--	--	--
MS.gene000484	18.96	17.55	36.37	21.65	17.84	27.14	75.64	441.76	220.29	315.54	402.6	450.81	256	264	601	325	256	403	1044	6568	3105	4357	6143	5684	chr7.3	35674876	35678229	-	--	--	K01568 pyruvate decarboxylase [EC:4.1.1.1] | (RefSeq) pyruvate decarboxylase 2 (A)	ko00010: Glycolysis / Gluconeogenesis; ko01100: Metabolic pathways; ko01110: Biosynthesis of secondary metabolites	PNY15372.1	PDC2_ARATH RecName: Full=Pyruvate decarboxylase 2; Short=AtPDC2; EC=4.1.1.1;	At5g54960	GO:0005829,cytosol; GO:0009536,plastid; GO:0016831,carboxy-lyase activity; GO:0000287,magnesium ion binding; GO:0004737,pyruvate decarboxylase activity; GO:0030976,thiamine pyrophosphate binding; GO:0071456,cellular response to hypoxia; GO:0001666,response to hypoxia; GO:0003674,molecular_function; GO:0003824,catalytic activity; GO:0016829,lyase activity; GO:0016830,carbon-carbon lyase activity; …	PF02776.18:Thiamine pyrophosphate enzyme, N-terminal TPP binding domain	--	--	--
MS.gene000553	823.6	333.08	487.46	278.87	121.23	182.07	474.01	221.63	535.53	24.05	42.07	11.79	3517	1584	2547	1324	550	855	2069	1042	2387	105	203	47	chr8.2	74382809	74384034	-	--	--	--	--	XP_003627277.1	AB19A_PRUPE RecName: Full=Auxin-binding protein ABP19a; Flags: Precursor;	At1g72610	GO:0048046,apoplast; GO:0005618,cell wall; GO:0030145,manganese ion binding; GO:0009734,auxin-activated signaling pathway; GO:0003674,molecular_function; GO:0005488,binding; GO:0046872,metal ion binding; GO:0043167,ion binding; GO:0043169,cation binding; GO:0046914,transition metal ion binding; GO:0007165,signal transduction; GO:0007154,cell communication; GO:0008150,biological_process; GO:000971…	PF00190.22:Cupin	--	--	--
MS.gene000645	1.41	1.78	1.72	0.07	0.12	0.08	0.93	1.62	1.31	0.2	0.44	0	34	48	51	2	3	2	23	43	33	5	12	0	chr5.1	19444777	19448019	+	--	--	K19613 leucine-rich repeat protein SHOC2 | (GenBank) CC-NBS-LRR resistance protein, putative (A)	--	XP_003612767.1	RGA3_SOLBU RecName: Full=Putative disease resistance protein RGA3; AltName: Full=Blight resistance protein B149; AltName: Full=RGA1-blb;	At3g14460	GO:0043531,ADP binding; GO:0005524,ATP binding; GO:0006952,defense response; GO:0000166,nucleotide binding; GO:0003674,molecular_function; GO:0005488,binding; GO:0017076,purine nucleotide binding; GO:0030554,adenyl nucleotide binding; GO:0032553,ribonucleotide binding; GO:0032555,purine ribonucleotide binding; GO:0032559,adenyl ribonucleotide binding; GO:0036094,small molecule binding; GO:0043167…	PF00931.22:NB-ARC domain	--	--	--
MS.gene000660	8.24	0.52	1.17	0.06	0.43	0.18	0.06	0.12	1.68	0	0.11	5.01	127	9	22	1	7	3	1	2	27	0	2	72	chr1.4	81370931	81376395	+	--	--	K24104 GPN-loop GTPase | (RefSeq) LOW QUALITY PROTEIN: uncharacterized protein LOC104799061 (A)	--	XP_013469913.1	CRK29_ARATH RecName: Full=Cysteine-rich receptor-like protein kinase 29; Short=Cysteine-rich RLK29; EC=2.7.11.-; Flags: Precursor;	At4g23160_2	GO:0016021,integral component of membrane; GO:0005886,plasma membrane; GO:0005773,vacuole; GO:0005524,ATP binding; GO:0106310,NA; GO:0004674,protein serine/threonine kinase activity; GO:0106311,NA; GO:0006468,protein phosphorylation; GO:0009737,response to abscisic acid; GO:0000166,nucleotide binding; GO:0003674,molecular_function; GO:0005488,binding; GO:0008144,drug binding; GO:0017076,purine nu…	PF00069.25:Protein kinase domain	--	--	--
MS.gene000740	14.88	9.4	18.41	0.57	2.89	3.01	13.02	3.22	0.53	2.85	1.95	12.23	189	133	286	8	39	42	169	45	7	37	28	145	chr6.4	29052882	29054585	-	--	--	K23618 acyl-activating enzyme 11/12 [EC:6.2.1.2 6.2.1.-] | (RefSeq) benzoate--CoA ligase, peroxisomal (A)	--	XP_013442481.1	CCL4_HUMLU RecName: Full=2-methylpropanoate--CoA ligase CCL4 {ECO:0000305|PubMed:23300257}; Short=HlCCL4 {ECO:0000303|PubMed:23300257}; EC=6.2.1.- {ECO:0000269|PubMed:23300257}; AltName: Full=2-methylbutanoate--CoA ligase CCL4 {ECO:0000305|PubMed:23300257}; EC=6.2.1.- {ECO:0000269|PubMed:23300257}; AltName: Full=Butanoate--CoA ligase CCL3 {ECO:0000305|PubMed:23300257}; EC=6.2.1.- {ECO:0000269|Pub…	At5g16340	GO:0003987,acetate-CoA ligase activity; GO:0003674,molecular_function; GO:0003824,catalytic activity; GO:0016405,CoA-ligase activity; GO:0016874,ligase activity; GO:0016877,ligase activity, forming carbon-sulfur bonds; GO:0016878,acid-thiol ligase activity	PF00501.28:AMP-binding enzyme	--	--	--
MS.gene000741	13.37	11.48	22.74	3.01	3.61	5.9	8.75	1.34	3.96	2.79	4.44	0	136	130	283	34	39	66	91	15	42	29	51	0	chr6.4	28979012	28984743	+	--	--	K01915 glutamine synthetase [EC:6.3.1.2] | (RefSeq) type-1 glutamine synthetase 1-like (A)	ko00220: Arginine biosynthesis; ko00250: Alanine, aspartate and glutamate metabolism; ko00630: Glyoxylate and dicarboxylate metabolism; ko00910: Nitrogen metabolism; ko01100: Metabolic pathways; ko01230: Biosynthesis of amino acids	XP_013441931.1	--	At3g53180	GO:0004356,glutamate-ammonia ligase activity; GO:0006542,glutamine biosynthetic process; GO:0003674,molecular_function; GO:0003824,catalytic activity; GO:0016211,ammonia ligase activity; GO:0016874,ligase activity; GO:0016879,ligase activity, forming carbon-nitrogen bonds; GO:0016880,acid-ammonia (or amide) ligase activity; GO:0008152,metabolic process; GO:0006082,organic acid metabolic process; …	PF00120.24:Glutamine synthetase, catalytic domain	--	--	--
MS.gene000803	5.3	0.67	1.92	0.24	0.84	4.07	0.21	0.08	0.5	0.92	1.66	0.47	243	34	108	12	41	205	10	4	24	43	86	20	chr1.4	21907481	21916780	+	--	--	K13459 disease resistance protein RPS2 | (RefSeq) probable disease resistance protein At1g12280 (A)	ko04626: Plant-pathogen interaction	XP_013466846.1	DRL27_ARATH RecName: Full=Disease resistance protein At4g27190;	At4g27190	GO:0043531,ADP binding; GO:0005524,ATP binding; GO:0006952,defense response; GO:0000166,nucleotide binding; GO:0003674,molecular_function; GO:0005488,binding; GO:0017076,purine nucleotide binding; GO:0030554,adenyl nucleotide binding; GO:0032553,ribonucleotide binding; GO:0032555,purine ribonucleotide binding; GO:0032559,adenyl ribonucleotide binding; GO:0036094,small molecule binding; GO:0043167…	PF00931.22:NB-ARC domain	--	--	--
MS.gene000838	3.61	6.71	4.68	36.98	19.11	20.39	9.75	7.81	8.12	9.26	12.24	11.21	29	60	46	330	163	180	80	69	68	76	111	84	chr7.1	38978024	38980135	+	--	--	K14976 thebaine 6-O-demethylase [EC:1.14.11.31] | (RefSeq) thebaine 6-O-demethylase (A)	ko00950: Isoquinoline alkaloid biosynthesis; ko01100: Metabolic pathways; ko01110: Biosynthesis of secondary metabolites	XP_013448903.1	DIOX2_PAPSO RecName: Full=Probable 2-oxoglutarate/Fe(II)-dependent dioxygenase; EC=1.14.11.-;	At3g21420	GO:0051213,dioxygenase activity; GO:0046872,metal ion binding; GO:0016740,transferase activity; GO:0003674,molecular_function; GO:0003824,catalytic activity; GO:0016491,oxidoreductase activity; GO:0005488,binding; GO:0043167,ion binding; GO:0043169,cation binding	PF03171.20:2OG-Fe(II) oxygenase superfamily	--	--	--
MS.gene000894	80.94	9.08	10.01	3.83	22.05	7.75	19.8	0.97	0	0.52	0	0	152	19	23	8	44	16	38	2	0	1	0	0	chr7.4	3812543	3812904	+	--	--	K02883 large subunit ribosomal protein L18e | (GenBank) 60S ribosomal protein L18-3 (A)	ko03010: Ribosome	XP_003626232.1	RL18_CICAR RecName: Full=60S ribosomal protein L18; Flags: Fragment;	At5g27850	GO:0005840,ribosome; GO:0003735,structural constituent of ribosome; GO:0006412,translation; GO:0003674,molecular_function; GO:0005198,structural molecule activity; GO:0008152,metabolic process; GO:0006518,peptide metabolic process; GO:0006807,nitrogen compound metabolic process; GO:0008150,biological_process; GO:0009058,biosynthetic process; GO:0009059,macromolecule biosynthetic process; GO:00099…	PF17135.4:Ribosomal protein 60S L18 and 50S L18e	--	--	--
MS.gene000896	39.72	118.24	142.71	30.57	22.23	80.37	418.33	410.47	501.88	183.72	9.5	0	111	368	488	95	66	247	1195	1263	1464	525	30	0	chr7.4	3753611	3755150	+	--	--	--	--	AFK38489.1	DRMH3_ARATH RecName: Full=Dormancy-associated protein homolog 3 {ECO:0000305}; AltName: Full=DRM1 homolog 3 {ECO:0000305};	At1g56220	--	--	--	--	--
MS.gene000929	2.22	4.98	2.42	15.63	3.83	2.69	9.4	32.57	19.83	10.12	4.25	0	6	15	8	47	11	8	26	97	56	28	13	0	chr4.3	6581353	6581715	+	--	--	K14297 nuclear pore complex protein Nup98-Nup96 | (RefSeq) LOW QUALITY PROTEIN: nuclear pore complex protein NUP96-like (A)	ko03013: RNA transport	XP_013447001.1	P21_SOYBN RecName: Full=Protein P21;	At4g11650	GO:0005576,extracellular region; GO:0006952,defense response; GO:0006950,response to stress; GO:0008150,biological_process; GO:0050896,response to stimulus; GO:0005575,cellular_component	PF00314.17:Thaumatin family	--	--	--
MS.gene000930	1.05	3.3	1.5	1.65	3.95	1.43	42.39	2.86	10.82	29.02	9.06	1.97	4	14	7	7	16	6	165	12	43	113	39	7	chr4.3	6651597	6653080	+	--	--	K01784 UDP-glucose 4-epimerase [EC:5.1.3.2] | (GenBank) UDP-D-glucose/UDP-D-galactose 4-epimerase (A)	ko00052: Galactose metabolism; ko00520: Amino sugar and nucleotide sugar metabolism; ko01100: Metabolic pathways	XP_013446997.1	GALE1_PEA RecName: Full=UDP-glucose 4-epimerase; EC=5.1.3.2; AltName: Full=Galactowaldenase; AltName: Full=UDP-galactose 4-epimerase;	At1g12780	GO:0003978,UDP-glucose 4-epimerase activity; GO:0006012,galactose metabolic process; GO:0003674,molecular_function; GO:0003824,catalytic activity; GO:0016853,isomerase activity; GO:0016854,racemase and epimerase activity; GO:0016857,racemase and epimerase activity, acting on carbohydrates and derivatives; GO:0008152,metabolic process; GO:0005975,carbohydrate metabolic process; GO:0005996,monosacc…	PF16363.5:GDP-mannose 4,6 dehydratase	--	--	--
MS.gene000931	5.48	3.66	2.08	30.03	1.92	4.29	21.19	37.5	29.18	8.97	7.67	0.14	43	32	20	262	16	37	170	324	239	72	68	1	chr4.3	6665783	6668728	+	--	--	K01784 UDP-glucose 4-epimerase [EC:5.1.3.2] | (GenBank) UDP-D-glucose/UDP-D-galactose 4-epimerase (A)	ko00052: Galactose metabolism; ko00520: Amino sugar and nucleotide sugar metabolism; ko01100: Metabolic pathways	XP_013446997.1	UGE1_PEA RecName: Full=Bifunctional UDP-glucose 4-epimerase and UDP-xylose 4-epimerase 1; EC=5.1.3.2; EC=5.1.3.5; AltName: Full=UDP-D-xylose 4-epimerase; AltName: Full=UDP-L-arabinose 4-epimerase; AltName: Full=UDP-galactose 4-epimerase 1; AltName: Full=UDP-glucose 4-epimerase 1; Short=PsUGE1;	At1g12780	GO:0050373,UDP-arabinose 4-epimerase activity; GO:0003978,UDP-glucose 4-epimerase activity; GO:0045227,capsule polysaccharide biosynthetic process; GO:0071555,cell wall organization; GO:0006012,galactose metabolic process; GO:0033358,UDP-L-arabinose biosynthetic process; GO:0003674,molecular_function; GO:0003824,catalytic activity; GO:0016853,isomerase activity; GO:0016854,racemase and epimerase …	PF16363.5:GDP-mannose 4,6 dehydratase	--	--	--
MS.gene000944	0.42	1.49	0.34	2.86	4.43	10.2	6.77	5.03	11.28	10.29	8.09	46.13	3	12	3	23	34	81	50	40	85	76	66	311	57543	62654	64215	+	--	--	K07213 copper chaperone | (RefSeq) copper chaperone homolog CCH (A)	--	XP_013446985.1	HIP7_ARATH RecName: Full=Heavy metal-associated isoprenylated plant protein 7 {ECO:0000303|PubMed:21072340, ECO:0000303|PubMed:23368984}; Short=AtHIP07 {ECO:0000303|PubMed:21072340, ECO:0000303|PubMed:23368984}; AltName: Full=Farnesylated protein 3 {ECO:0000303|PubMed:8837031}; Short=AtFP3 {ECO:0000303|PubMed:8837031}; Flags: Precursor;	At5g63530	GO:0005886,plasma membrane; GO:0046914,transition metal ion binding; GO:0046916,cellular transition metal ion homeostasis; GO:0003674,molecular_function; GO:0005488,binding; GO:0046872,metal ion binding; GO:0043167,ion binding; GO:0043169,cation binding; GO:0006873,cellular ion homeostasis; GO:0006875,cellular metal ion homeostasis; GO:0008150,biological_process; GO:0009987,cellular process; GO:0…	PF00403.26:Heavy-metal-associated domain	--	--	--
MS.gene000968	18.83	16.53	19.06	233.1	86.82	107.42	41.25	121.87	90.21	176.86	155.5	259.92	88	86	109	1211	431	552	197	627	440	845	821	1134	chr3.2	50055327	50055953	+	--	--	K00640 serine O-acetyltransferase [EC:2.3.1.30] | (GenBank) serine acetyltransferase (A)	ko00270: Cysteine and methionine metabolism; ko00920: Sulfur metabolism; ko01100: Metabolic pathways; ko01110: Biosynthesis of secondary metabolites; ko01200: Carbon metabolism; ko01230: Biosynthesis of amino acids	XP_013459995.1	SAT3_ARATH RecName: Full=Serine acetyltransferase 3, mitochondrial; Short=AtSAT-3; Short=AtSERAT2;2; Short=SAT-m; EC=2.3.1.30; Flags: Precursor;	At3g13110	GO:0005829,cytosol; GO:0005739,mitochondrion; GO:0009001,serine O-acetyltransferase activity; GO:0008270,zinc ion binding; GO:0019344,cysteine biosynthetic process; GO:0006535,cysteine biosynthetic process from serine; GO:0046686,response to cadmium ion; GO:0003674,molecular_function; GO:0003824,catalytic activity; GO:0008374,O-acyltransferase activity; GO:0016407,acetyltransferase activity; GO:0…	PF06426.14:Serine acetyltransferase, N-terminal	--	--	--
MS.gene00102	2.27	3.57	5.69	8.68	12.83	12.27	13.61	13.03	16.32	12.5	17.34	0	16	28	49	68	96	95	98	101	120	90	138	0	chr2.1	59503288	59504232	-	--	--	K14803 protein phosphatase PTC2/3 [EC:3.1.3.16] | (GenBank) protein phosphatase 2C-like protein (A)	--	XP_003594655.1	P2C02_ORYSJ RecName: Full=Probable protein phosphatase 2C 2; Short=OsPP2C02; EC=3.1.3.16;	At1g48040	GO:0046872,metal ion binding; GO:0106306,NA; GO:0004722,protein serine/threonine phosphatase activity; GO:0106307,NA; GO:0006470,protein dephosphorylation; GO:0003674,molecular_function; GO:0005488,binding; GO:0043167,ion binding; GO:0043169,cation binding; GO:0003824,catalytic activity; GO:0004721,phosphoprotein phosphatase activity; GO:0016787,hydrolase activity; GO:0016788,hydrolase activity, …	PF00481.21:Protein phosphatase 2C	--	--	--
MS.gene001050	3.19	0.33	7.43	2.87	85.01	47.04	13.34	14.84	4	15.98	4.68	21.06	26	3	74	26	735	421	111	133	34	133	43	160	chr5.4	2340677	2342388	+	--	--	K05894 12-oxophytodienoic acid reductase [EC:1.3.1.42] | (GenBank) 12-oxophytodienoate reductase-like protein (A)	ko00592: alpha-Linolenic acid metabolism; ko01100: Metabolic pathways; ko01110: Biosynthesis of secondary metabolites	XP_003610758.1	OPR11_ORYSJ RecName: Full=Putative 12-oxophytodienoate reductase 11; EC=1.3.1.-; AltName: Full=OPDA-reductase 11; Short=OsOPR11;	At1g76680	GO:0010181,FMN binding; GO:0016491,oxidoreductase activity; GO:0006633,fatty acid biosynthetic process; GO:0031408,oxylipin biosynthetic process; GO:0000166,nucleotide binding; GO:0003674,molecular_function; GO:0005488,binding; GO:0032553,ribonucleotide binding; GO:0036094,small molecule binding; GO:0043167,ion binding; GO:0043168,anion binding; GO:0048037,cofactor binding; GO:0050662,coenzyme bi…	PF00724.20:NADH:flavin oxidoreductase / NADH oxidase family	--	--	--
MS.gene001051	1.11	0.22	1.81	19.01	23.13	10.95	3.61	2.01	1.88	39.54	29.91	108.58	9	2	18	172	200	98	30	18	16	329	275	825	chr5.4	2347244	2348936	+	--	--	K05894 12-oxophytodienoic acid reductase [EC:1.3.1.42] | (GenBank) 12-oxophytodienoate reductase-like protein (A)	ko00592: alpha-Linolenic acid metabolism; ko01100: Metabolic pathways; ko01110: Biosynthesis of secondary metabolites	XP_003610759.1	OPR11_ORYSJ RecName: Full=Putative 12-oxophytodienoate reductase 11; EC=1.3.1.-; AltName: Full=OPDA-reductase 11; Short=OsOPR11;	At1g76690	GO:0010181,FMN binding; GO:0016491,oxidoreductase activity; GO:0006633,fatty acid biosynthetic process; GO:0031408,oxylipin biosynthetic process; GO:0000166,nucleotide binding; GO:0003674,molecular_function; GO:0005488,binding; GO:0032553,ribonucleotide binding; GO:0036094,small molecule binding; GO:0043167,ion binding; GO:0043168,anion binding; GO:0048037,cofactor binding; GO:0050662,coenzyme bi…	PF00724.20:NADH:flavin oxidoreductase / NADH oxidase family	--	--	--
MS.gene00108	0.14	0.12	0.11	2.07	1.53	2.34	1.19	2.95	1.04	8.35	16.07	1.16	1	1	1	17	12	19	9	24	8	63	134	8	chr2.1	59283436	59285295	-	--	--	K09422 transcription factor MYB, plant | (GenBank) myb transcription factor (A)	--	XP_003594670.1	MYB78_ARATH RecName: Full=Transcription factor MYB78 {ECO:0000303|PubMed:9839469}; AltName: Full=Myb-related protein 78 {ECO:0000303|PubMed:9839469}; Short=AtMYB78 {ECO:0000303|PubMed:9839469};	At5g49620	GO:0005634,nucleus; GO:0003700,DNA-binding transcription factor activity; GO:0043565,sequence-specific DNA binding; GO:0000976,transcription regulatory region sequence-specific DNA binding; GO:0006355,regulation of transcription, DNA-templated; GO:0009737,response to abscisic acid; GO:1902074,response to salt; GO:0140110,transcription regulator activity; GO:0003674,molecular_function; GO:0003676,…	PF00249.31:Myb-like DNA-binding domain	MYB	TF	MYB->MYB
MS.gene001115	45.4	24.14	18.06	0.67	8.79	8.28	21.62	55.95	17.24	60.25	43.22	56.7	608	360	296	10	125	122	296	825	241	825	654	709	chr5.2	17959198	17962396	+	--	--	K23872 putative homogalacturonan methyltransferase [EC:2.1.1.-] | (RefSeq) hypothetical protein (A)	--	XP_003612612.1	PMTK_ARATH RecName: Full=Probable methyltransferase PMT20; EC=2.1.1.-;	At1g31850	GO:0005737,cytoplasm; GO:0005768,endosome; GO:0005794,Golgi apparatus; GO:0005797,Golgi medial cisterna; GO:0000139,Golgi membrane; GO:0016021,integral component of membrane; GO:0005802,trans-Golgi network; GO:0008168,methyltransferase activity; GO:0032259,methylation; GO:0003674,molecular_function; GO:0003824,catalytic activity; GO:0016740,transferase activity; GO:0016741,transferase activity, t…	PF03141.16:Putative S-adenosyl-L-methionine-dependent methyltransferase	--	--	--
MS.gene001161	2.64	1.53	2.93	0.17	0	0	0.92	1.71	0.54	0	0.17	0	14	9	19	1	0	0	5	10	3	0	1	0	chr8.2	18109959	18112063	-	--	--	--	--	GAU32830.1	--	At5g62720	GO:0016021,integral component of membrane; GO:0005575,cellular_component; GO:0016020,membrane; GO:0031224,intrinsic component of membrane; GO:0044425,membrane part	PF04982.13:HPP family	--	--	--
MS.gene001171	0	0.13	0	0	0	2.94	6.9	0.4	2.53	2.87	0	0	0	1	0	0	0	22	48	3	18	20	0	0	43309	141716	143887	+	--	--	K14376 poly(A) polymerase [EC:2.7.7.19] | (GenBank) poly(A) polymerase-like protein (A)	ko03015: mRNA surveillance pathway	XP_003631046.2	PAPS1_ARATH RecName: Full=Nuclear poly(A) polymerase 1 {ECO:0000303|PubMed:18479511}; Short=PAP(I) {ECO:0000305}; Short=Poly(A) polymerase I {ECO:0000305}; EC=2.7.7.19 {ECO:0000269|PubMed:15297145}; AltName: Full=Polynucleotide adenylyltransferase 1 {ECO:0000305};	At1g17980	GO:0005634,nucleus; GO:0005524,ATP binding; GO:0046872,metal ion binding; GO:0004652,polynucleotide adenylyltransferase activity; GO:0003723,RNA binding; GO:0009908,flower development; GO:0048366,leaf development; GO:0006378,mRNA polyadenylation; GO:0008285,negative regulation of cell proliferation; GO:0045824,negative regulation of innate immune response; GO:0048451,petal formation; GO:0043631,R…	PF04928.17:Poly(A) polymerase central domain	--	--	--
MS.gene001172	0.28	0	0.23	0	0	6.22	20.63	1.04	2.46	6.41	0	0	1	0	1	0	0	24	74	4	9	23	0	0	43309	144265	144735	+	--	--	K14376 poly(A) polymerase [EC:2.7.7.19] | (GenBank) poly(A) polymerase-like protein (A)	ko03015: mRNA surveillance pathway	XP_003631046.2	--	--	GO:0005634,nucleus; GO:0005524,ATP binding; GO:0004652,polynucleotide adenylyltransferase activity; GO:0003723,RNA binding; GO:0006378,mRNA polyadenylation; GO:0000166,nucleotide binding; GO:0003674,molecular_function; GO:0005488,binding; GO:0008144,drug binding; GO:0017076,purine nucleotide binding; GO:0030554,adenyl nucleotide binding; GO:0032553,ribonucleotide binding; GO:0032555,purine ribonu…	--	--	--	--
MS.gene001264	15.8	16.11	26.92	6.75	6.43	19.12	4.85	3.16	1.28	7.33	3.44	3.87	118	134	246	56	51	157	37	26	10	56	29	27	14719	4378	5978	+	--	--	K00430 peroxidase [EC:1.11.1.7] | (GenBank) peroxidase family protein (A)	ko00940: Phenylpropanoid biosynthesis; ko01100: Metabolic pathways; ko01110: Biosynthesis of secondary metabolites	XP_013465463.1	PER61_ARATH RecName: Full=Probable peroxidase 61; Short=Atperox P61; EC=1.11.1.7; Flags: Precursor;	At5g24070	GO:0005576,extracellular region; GO:0009505,plant-type cell wall; GO:0009506,plasmodesma; GO:0020037,heme binding; GO:0046872,metal ion binding; GO:0004601,peroxidase activity; GO:0042744,hydrogen peroxide catabolic process; GO:0006979,response to oxidative stress; GO:0003674,molecular_function; GO:0005488,binding; GO:0046906,tetrapyrrole binding; GO:0048037,cofactor binding; GO:0097159,organic c…	PF00141.23:Peroxidase	--	--	--
MS.gene00127	0.15	0.27	0	1.21	0.14	0.81	1.75	0.68	5.57	1.75	0.92	0	1	2	0	9	1	6	12	5	39	12	7	0	chr2.1	58965884	58966980	-	--	--	K15255 ATP-dependent DNA helicase PIF1 [EC:3.6.4.12] | (RefSeq) ATP-dependent DNA helicase PIF1-like (A)	--	XP_003594692.1	DRPE_CRAPL RecName: Full=Desiccation-related protein PCC13-62; Flags: Precursor;	At1g47980	GO:0071465,cellular response to desiccation; GO:1902075,cellular response to salt; GO:0001101,response to acid chemical; GO:0006950,response to stress; GO:0007154,cell communication; GO:0008150,biological_process; GO:0009269,response to desiccation; GO:0009414,response to water deprivation; GO:0009415,response to water; GO:0009605,response to external stimulus; GO:0009628,response to abiotic stim…	PF13668.6:Ferritin-like domain	--	--	--
MS.gene001323	29.72	29.61	17.11	2.49	6.23	2.15	8.02	3.23	7.47	2.9	1.49	2.12	301	334	212	28	67	24	83	36	79	30	17	20	47705	6112	7706	+	--	--	K01051 pectinesterase [EC:3.1.1.11] | (GenBank) pectinesterase/pectinesterase inhibitor (A)	ko00040: Pentose and glucuronate interconversions; ko01100: Metabolic pathways	XP_003622699.1	PME18_ARATH RecName: Full=Pectinesterase/pectinesterase inhibitor 18; AltName: Full=AtPMEpcrA; Contains: RecName: Full=Pectinesterase inhibitor 18; AltName: Full=Pectin methylesterase inhibitor 18; Contains: RecName: Full=Bifunctional pectinesterase 18/rRNA N-glycosylase; Short=PE 18; EC=3.1.1.11; EC=3.2.2.22; AltName: Full=Pectin methylesterase 18; AltName: Full=Pectin methylesterase 4; Short=At…	At1g11580	GO:0005618,cell wall; GO:0005829,cytosol; GO:0005576,extracellular region; GO:0016020,membrane; GO:0005774,vacuolar membrane; GO:0045330,aspartyl esterase activity; GO:0030599,pectinesterase activity; GO:0046910,pectinesterase inhibitor activity; GO:0030598,rRNA N-glycosylase activity; GO:0090729,toxin activity; GO:0042545,cell wall modification; GO:0050832,defense response to fungus; GO:0031640,…	PF01095.19:Pectinesterase	--	--	--
MS.gene001355	0.1	0.18	0.08	0	7.45	0.54	1.94	3.86	0.09	0.1	0.09	0	1	2	1	0	80	6	20	43	1	1	1	0	51684	3084	8292	+	--	--	K03845 alpha-1,3-mannosyltransferase [EC:2.4.1.258] | (GenBank) alpha-1,3-mannosyltransferase, putative (A)	ko00510: N-Glycan biosynthesis; ko00513: Various types of N-glycan biosynthesis; ko01100: Metabolic pathways	XP_003625908.2	ALG3_ARATH RecName: Full=Dol-P-Man:Man(5)GlcNAc(2)-PP-Dol alpha-1,3-mannosyltransferase; EC=2.4.1.258; AltName: Full=Alpha-1,3-mannosyltransferase ALG3; AltName: Full=Asparagine-linked glycosylation protein 3; Short=AtALG3; AltName: Full=Not56-like protein;	At2g47760	GO:0005783,endoplasmic reticulum; GO:0005789,endoplasmic reticulum membrane; GO:0016021,integral component of membrane; GO:0000033,alpha-1,3-mannosyltransferase activity; GO:0052925,dol-P-Man:Man(5)GlcNAc(2)-PP-Dol alpha-1,3-mannosyltransferase activity; GO:0006486,protein glycosylation; GO:0000030,mannosyltransferase activity; GO:0003674,molecular_function; GO:0003824,catalytic activity; GO:0016…	PF05208.13:ALG3 protein	--	--	--
MS.gene001381	144.5	101.18	158.4	43.32	48.58	39.63	53.3	34.37	38.18	17.1	26.9	45.14	504	393	676	168	180	152	190	132	139	61	106	147	chr4.1	12650096	12650563	-	--	--	K02977 ubiquitin-small subunit ribosomal protein S27Ae | (GenBank) ubiquitin-40S ribosomal S27a-like protein (A)	ko03010: Ribosome; ko04120: Ubiquitin mediated proteolysis	XP_003629895.2	RS27A_SOLLC RecName: Full=Ubiquitin-40S ribosomal protein S27a; Contains: RecName: Full=Ubiquitin; Contains: RecName: Full=40S ribosomal protein S27a; Flags: Precursor;	At1g23410	GO:0005737,cytoplasm; GO:0005634,nucleus; GO:0005840,ribosome; GO:0046872,metal ion binding; GO:0031386,protein tag; GO:0003735,structural constituent of ribosome; GO:0031625,ubiquitin protein ligase binding; GO:0019941,modification-dependent protein catabolic process; GO:0016567,protein ubiquitination; GO:0006412,translation; GO:0003674,molecular_function; GO:0005488,binding; GO:0043167,ion bind…	PF00240.23:Ubiquitin family	--	--	--
MS.gene001557	674.48	181.84	60.55	163.38	78.26	47.16	35.97	85.98	21.82	11.27	29.87	49.96	2458	738	270	662	303	189	134	345	83	42	123	170	21585	10827	11525	-	--	--	K23637 WAP four-disulfide core domain protein 3 | (RefSeq) hypothetical protein (A)	--	XP_013459315.1	ALB1D_PEA RecName: Full=Albumin-1 D; AltName: Full=PA1 D; AltName: Full=PsaA1b012; Contains: RecName: Full=Albumin-1 D chain b; AltName: Full=Leginsulin D; AltName: Full=PA1b D; Contains: RecName: Full=Albumin-1 D chain a; AltName: Full=PA1a D; Flags: Precursor;	--	GO:0045735,nutrient reservoir activity; GO:0090729,toxin activity; GO:0009405,pathogenesis; GO:0003674,molecular_function; GO:0008150,biological_process; GO:0044419,interspecies interaction between organisms; GO:0051704,multi-organism process	PF16720.5:Albumin I chain a	--	--	--
MS.gene00158	1720.14	1599.32	975.64	862.85	1486.55	1685.45	608.38	620.11	486.92	325.45	539.17	127.98	23421	24251	16254	13062	21504	25237	8467	9296	6920	4531	8295	1627	chr2.1	58522341	58526784	+	--	--	K01648 ATP citrate (pro-S)-lyase [EC:2.3.3.8] | (GenBank) ATP:citrate lyase (A)	ko00020: Citrate cycle (TCA cycle); ko01100: Metabolic pathways; ko01110: Biosynthesis of secondary metabolites	XP_003594738.1	ACLB1_ARATH RecName: Full=ATP-citrate synthase beta chain protein 1; Short=ATP-citrate synthase B-1; EC=2.3.3.8; AltName: Full=ATP-citrate lyase B-1; AltName: Full=Citrate cleavage enzyme B-1;	At3g06650	GO:0009346,citrate lyase complex; GO:0005829,cytosol; GO:0005524,ATP binding; GO:0003878,ATP citrate synthase activity; GO:0046872,metal ion binding; GO:0006085,acetyl-CoA biosynthetic process; GO:0006633,fatty acid biosynthetic process; GO:0000166,nucleotide binding; GO:0003674,molecular_function; GO:0005488,binding; GO:0008144,drug binding; GO:0017076,purine nucleotide binding; GO:0030554,adeny…	PF00285.21:Citrate synthase, C-terminal domain	--	--	--
MS.gene001663	125.88	54.51	23.5	46.55	12.03	9.3	11.88	11.61	5.51	11.87	3.96	0	197	95	45	81	20	16	19	20	9	19	7	0	chr2.3	3650953	3652580	-	--	--	K17778 mitochondrial import inner membrane translocase subunit TIM10 | (GenBank) import inner membrane translocase protein (A)	--	XP_003597416.1	TIM10_ARATH RecName: Full=Mitochondrial import inner membrane translocase subunit TIM10;	At2g29530	GO:0005743,mitochondrial inner membrane; GO:0005758,mitochondrial intermembrane space; GO:0046872,metal ion binding; GO:0045039,protein import into mitochondrial inner membrane; GO:0003674,molecular_function; GO:0005488,binding; GO:0043167,ion binding; GO:0043169,cation binding; GO:0008104,protein localization; GO:0006605,protein targeting; GO:0006626,protein targeting to mitochondrion; GO:000681…	PF02953.15:Tim10/DDP family zinc finger	--	--	--
MS.gene00167	0.45	0.8	1.28	7.51	2.74	10.3	3.21	1.15	2.21	4.81	8.97	4.31	6	12	21	112	39	152	44	17	31	66	136	54	chr2.1	58433927	58435726	+	--	--	K14494 DELLA protein | (RefSeq) DELLA protein GAIP-like (A)	ko04075: Plant hormone signal transduction	XP_003594754.1	RGL2_ARATH RecName: Full=DELLA protein RGL2 {ECO:0000303|PubMed:11877383}; AltName: Full=GRAS family protein 15; Short=AtGRAS-15; AltName: Full=RGA-like protein 2 {ECO:0000303|PubMed:11877383}; AltName: Full=Scarecrow-like protein 19 {ECO:0000303|PubMed:10341448}; Short=AtSCL19 {ECO:0000303|PubMed:10341448};	At3g03450	GO:0005634,nucleus; GO:0003700,DNA-binding transcription factor activity; GO:0043565,sequence-specific DNA binding; GO:0030154,cell differentiation; GO:0006952,defense response; GO:0009908,flower development; GO:0009740,gibberellic acid mediated signaling pathway; GO:0042538,hyperosmotic salinity response; GO:0009867,jasmonic acid mediated signaling pathway; GO:0009938,negative regulation of gibb…	PF03514.14:GRAS domain family	GRAS	TF	GRAS
MS.gene00168	1.05	2.96	3.18	14.82	16.57	15.12	3.08	10.07	4.52	8.65	13.79	15.81	14	44	52	220	235	222	42	148	63	118	208	197	chr2.1	58428393	58430183	+	--	--	K14494 DELLA protein | (RefSeq) DELLA protein GAI1 (A)	ko04075: Plant hormone signal transduction	XP_003594755.1	RGL2_ARATH RecName: Full=DELLA protein RGL2 {ECO:0000303|PubMed:11877383}; AltName: Full=GRAS family protein 15; Short=AtGRAS-15; AltName: Full=RGA-like protein 2 {ECO:0000303|PubMed:11877383}; AltName: Full=Scarecrow-like protein 19 {ECO:0000303|PubMed:10341448}; Short=AtSCL19 {ECO:0000303|PubMed:10341448};	At3g03450	GO:0005634,nucleus; GO:0003700,DNA-binding transcription factor activity; GO:0043565,sequence-specific DNA binding; GO:0030154,cell differentiation; GO:0006952,defense response; GO:0009908,flower development; GO:0009740,gibberellic acid mediated signaling pathway; GO:0042538,hyperosmotic salinity response; GO:0009867,jasmonic acid mediated signaling pathway; GO:0009938,negative regulation of gibb…	PF03514.14:GRAS domain family	GRAS	TF	GRAS
MS.gene001686	2.12	0.64	1.35	5.73	0.56	0.21	9.01	13.72	5.65	7.62	6.16	5.81	18	6	14	54	5	2	78	128	50	66	59	46	chr1.3	64737150	64738905	-	--	--	K14491 two-component response regulator ARR-B family | (RefSeq) two-component response regulator ARR12 isoform X2 (A)	ko04075: Plant hormone signal transduction	XP_003591795.2	HHO1_ARATH RecName: Full=Transcription factor HHO1 {ECO:0000305}; AltName: Full=MYB-domain transcription factor HHO1 {ECO:0000305}; AltName: Full=Protein HRS1 HOMOLOG 1 {ECO:0000303|PubMed:25723764};	At1g68670	GO:0005634,nucleus; GO:0003677,DNA binding; GO:0003700,DNA-binding transcription factor activity; GO:0016036,cellular response to phosphate starvation; GO:0006355,regulation of transcription, DNA-templated; GO:0090548,response to nitrate starvation; GO:0003674,molecular_function; GO:0003676,nucleic acid binding; GO:0005488,binding; GO:0097159,organic cyclic compound binding; GO:1901363,heterocycl…	PF00249.31:Myb-like DNA-binding domain	GARP-G2-like	TF	GARP->GARP-G2-like
MS.gene001695	2.63	1.64	0.99	0	0.19	0.09	0.59	1.38	1.16	0.1	0.27	0	26	18	12	0	2	1	6	15	12	1	3	0	chr1.3	64658579	64661956	-	--	--	K24940 CWF19-like protein 2 | (RefSeq) hypothetical protein (A)	--	XP_003591772.1	--	At2g16980	GO:0016021,integral component of membrane; GO:0022857,transmembrane transporter activity; GO:0003674,molecular_function; GO:0005215,transporter activity; GO:0005575,cellular_component; GO:0016020,membrane; GO:0031224,intrinsic component of membrane; GO:0044425,membrane part	PF07690.16:Major Facilitator Superfamily	--	--	--
MS.gene001700	199.33	668.94	376.14	89.35	359.98	466.7	119.23	210.92	32.14	25.83	27.68	29.33	1230	4597	2840	613	2360	3167	752	1433	207	163	193	169	chr1.3	64634218	64635045	-	--	--	--	--	XP_013469340.1	LCB3_ROBPS RecName: Full=Putative bark agglutinin LECRPA3; Flags: Precursor; Fragment;	At5g10530	GO:0030246,carbohydrate binding; GO:0046872,metal ion binding; GO:0003674,molecular_function; GO:0005488,binding; GO:0043167,ion binding; GO:0043169,cation binding	PF00139.19:Legume lectin domain	--	--	--
MS.gene001708	30.19	57.73	47.98	874.99	280.49	161.67	38.29	163.01	94.27	86.94	304.8	404.8	54	115	105	1740	533	318	70	321	176	159	616	676	chr1.3	64569739	64571711	-	--	--	K07213 copper chaperone | (GenBank) copper chaperone (A)	--	XP_003591755.1	ATOX1_ARATH RecName: Full=Copper transport protein ATX1; AltName: Full=Copper chaperone ATX1;	At3g56240	GO:0005829,cytosol; GO:0005739,mitochondrion; GO:0099503,secretory vesicle; GO:0046872,metal ion binding; GO:0006825,copper ion transport; GO:0003674,molecular_function; GO:0005488,binding; GO:0043167,ion binding; GO:0043169,cation binding; GO:0000041,transition metal ion transport; GO:0006810,transport; GO:0006811,ion transport; GO:0006812,cation transport; GO:0030001,metal ion transport; GO:000…	PF00403.26:Heavy-metal-associated domain	--	--	--
MS.gene001737	0	0.69	1.04	1.53	0.72	2.39	4.73	21.89	7.72	27.47	19.45	4.91	0	9	15	20	9	31	57	284	95	331	259	54	chr1.3	64167512	64172927	-	--	--	K00873 pyruvate kinase [EC:2.7.1.40] | (GenBank) pyruvate kinase family protein (A)	ko00010: Glycolysis / Gluconeogenesis; ko00230: Purine metabolism; ko00620: Pyruvate metabolism; ko01100: Metabolic pathways; ko01110: Biosynthesis of secondary metabolites; ko01200: Carbon metabolism; ko01230: Biosynthesis of amino acids; ko01240: Biosynthesis of cofactors	XP_013469353.1	KPYC1_ORYSI RecName: Full=Pyruvate kinase 1, cytosolic {ECO:0000305}; Short=OsPK1 {ECO:0000305}; EC=2.7.1.40 {ECO:0000305};	At3g52990	GO:0005829,cytosol; GO:0005524,ATP binding; GO:0016301,kinase activity; GO:0000287,magnesium ion binding; GO:0030955,potassium ion binding; GO:0004743,pyruvate kinase activity; GO:0000166,nucleotide binding; GO:0003674,molecular_function; GO:0005488,binding; GO:0008144,drug binding; GO:0017076,purine nucleotide binding; GO:0030554,adenyl nucleotide binding; GO:0032553,ribonucleotide binding; GO:0…	PF00224.21:Pyruvate kinase, barrel domain	--	--	--
MS.gene001744	4.33	2.92	4.43	41.48	9.47	8.58	19.53	45.83	15.87	54.79	53.56	106.09	28	21	35	298	65	61	129	326	107	362	391	640	chr8.2	66389883	66392459	+	--	--	K15095 (+)-neomenthol dehydrogenase [EC:1.1.1.208] | (GenBank) NAD(P)-binding rossmann-fold protein (A)	ko00902: Monoterpenoid biosynthesis; ko01110: Biosynthesis of secondary metabolites	XP_003627594.1	SDR1_ARATH RecName: Full=(+)-neomenthol dehydrogenase {ECO:0000303|PubMed:18599651}; EC=1.1.1.- {ECO:0000269|PubMed:21169366}; EC=1.1.1.208 {ECO:0000269|PubMed:18599651}; AltName: Full=Menthone:neomenthol reductase; AltName: Full=Short-chain dehydrogenase/reductase 1; Short=AtSDR1;	At3g61220	GO:0005737,cytoplasm; GO:0016020,membrane; GO:0047501,(+)-neomenthol dehydrogenase activity; GO:0006952,defense response; GO:0003674,molecular_function; GO:0003824,catalytic activity; GO:0016491,oxidoreductase activity; GO:0016614,oxidoreductase activity, acting on CH-OH group of donors; GO:0016616,oxidoreductase activity, acting on the CH-OH group of donors, NAD or NADP as acceptor; GO:0006950,r…	PF00106.25:short chain dehydrogenase	--	--	--
MS.gene00178	0.9	1.28	4.54	1.16	0.73	0.12	6.7	16.44	18.7	4.55	3.09	0	7	11	43	10	6	1	53	140	151	36	27	0	chr2.1	58316351	58317388	+	--	--	K25108 licheninase [EC:3.2.1.73] | (RefSeq) glucan endo-1,3-beta-glucosidase-like (A)	--	ABD32327.1	E13B_PEA RecName: Full=Glucan endo-1,3-beta-glucosidase; EC=3.2.1.39; AltName: Full=(1->3)-beta-glucan endohydrolase; Short=(1->3)-beta-glucanase; AltName: Full=Beta-1,3-endoglucanase; Flags: Precursor;	At4g16260	GO:0042973,glucan endo-1,3-beta-D-glucosidase activity; GO:0005975,carbohydrate metabolic process; GO:0006952,defense response; GO:0003674,molecular_function; GO:0003824,catalytic activity; GO:0004553,hydrolase activity, hydrolyzing O-glycosyl compounds; GO:0008422,beta-glucosidase activity; GO:0015926,glucosidase activity; GO:0016787,hydrolase activity; GO:0016798,hydrolase activity, acting on g…	PF00332.18:Glycosyl hydrolases family 17	--	--	--
MS.gene001799	1.17	0.58	0.52	0.96	3.01	20	4.07	2.52	5.93	5.43	4.72	5.49	11	6	6	10	30	206	39	26	58	52	50	48	chr8.3	63715871	63723018	-	--	--	K13667 EGF-domain serine glucosyl/xylosyltransferase [EC:2.4.1.376 2.4.2.63] | (RefSeq) O-glucosyltransferase rumi (A)	ko00514: Other types of O-glycan biosynthesis	XP_013444881.1	--	At2g45830	GO:0016021,integral component of membrane; GO:0016757,transferase activity, transferring glycosyl groups; GO:0003674,molecular_function; GO:0003824,catalytic activity; GO:0016740,transferase activity; GO:0005575,cellular_component; GO:0016020,membrane; GO:0031224,intrinsic component of membrane; GO:0044425,membrane part	PF05686.12:Glycosyl transferase family 90	--	--	--
MS.gene00180	9.28	5.85	7.98	18	24.28	36.4	14.98	16.21	34.3	2.36	11.2	105.49	77	54	81	166	214	332	127	148	297	20	105	817	chr2.1	58283474	58286660	-	--	--	K25108 licheninase [EC:3.2.1.73] | (RefSeq) glucan endo-1,3-beta-glucosidase-like (A)	--	AAV66071.1	E13B_PEA RecName: Full=Glucan endo-1,3-beta-glucosidase; EC=3.2.1.39; AltName: Full=(1->3)-beta-glucan endohydrolase; Short=(1->3)-beta-glucanase; AltName: Full=Beta-1,3-endoglucanase; Flags: Precursor;	At4g16260	GO:0042973,glucan endo-1,3-beta-D-glucosidase activity; GO:0005975,carbohydrate metabolic process; GO:0006952,defense response; GO:0003674,molecular_function; GO:0003824,catalytic activity; GO:0004553,hydrolase activity, hydrolyzing O-glycosyl compounds; GO:0008422,beta-glucosidase activity; GO:0015926,glucosidase activity; GO:0016787,hydrolase activity; GO:0016798,hydrolase activity, acting on g…	PF00332.18:Glycosyl hydrolases family 17	--	--	--
MS.gene00182	8.56	20.95	27.97	23.44	4.39	5.31	5.71	2.83	1.12	4.94	2.07	0	22	60	88	67	12	15	15	8	3	13	6	0	chr2.1	58255279	58257848	+	--	--	K03017 DNA-directed RNA polymerase II subunit RPB9 | (GenBank) DNA-directed RNA polymerase subunit (A)	ko03020: RNA polymerase	XP_003594777.1	RPB9A_ARATH RecName: Full=DNA-directed RNA polymerases II, IV and V subunit 9A;	At3g16980	GO:0005730,nucleolus; GO:0005665,RNA polymerase II, core complex; GO:0000419,RNA polymerase V complex; GO:0003899,DNA-directed 5'-3' RNA polymerase activity; GO:0003676,nucleic acid binding; GO:0008270,zinc ion binding; GO:0001193,maintenance of transcriptional fidelity during DNA-templated transcription elongation from RNA polymerase II promoter; GO:0006379,mRNA cleavage; GO:0006367,transcriptio…	PF02150.16:RNA polymerases M/15 Kd subunit	--	--	--
MS.gene001879	11.49	22.95	3.31	1.09	1.07	0.29	0.4	7.79	1.78	3.88	5.44	0	142	316	50	15	14	4	5	106	23	49	76	0	chr7.3	73501423	73505899	-	--	--	--	--	GAU44138.1	ECD_ARATH RecName: Full=Protein ecdysoneless homolog {ECO:0000250|UniProtKB:Q9W032};	At5g65490	GO:0005634,nucleus; GO:0005622,intracellular; GO:0005575,cellular_component; GO:0005623,cell; GO:0043231,intracellular membrane-bounded organelle; GO:0043226,organelle; GO:0043227,membrane-bounded organelle; GO:0043229,intracellular organelle; GO:0044424,intracellular part; GO:0044464,cell part	PF02902.19:Ulp1 protease family, C-terminal catalytic domain	--	--	--
MS.gene001914	5	5.78	3.25	28.38	19.51	26.84	3.6	11.59	14.87	56.83	38.23	13.23	49	63	39	309	203	289	36	125	152	569	423	121	chr7.3	72786017	72788234	+	--	--	K15400 omega-hydroxypalmitate O-feruloyl transferase [EC:2.3.1.188] | (GenBank) omega-hydroxypalmitate O-feruloyl transferase (A)	ko00073: Cutin, suberine and wax biosynthesis	XP_013447911.1	HHT1_ARATH RecName: Full=Omega-hydroxypalmitate O-feruloyl transferase; EC=2.3.1.188; AltName: Full=Omega-hydroxyacid hydroxycinnamoyltransferase; AltName: Full=Protein ALIPHATIC SUBERIN FERULOYL TRANSFERASE;	At5g41040	GO:0050734,hydroxycinnamoyltransferase activity; GO:0102406,omega-hydroxypalmitate O-sinapoyl transferase activity; GO:0016747,transferase activity, transferring acyl groups other than amino-acyl groups; GO:0052325,cell wall pectin biosynthetic process; GO:0010345,suberin biosynthetic process; GO:0003674,molecular_function; GO:0003824,catalytic activity; GO:0016740,transferase activity; GO:001674…	PF02458.15:Transferase family	--	--	--
MS.gene002011	28.5	18.02	15.7	4.7	4.22	1.55	2.92	1.07	2.25	3.76	20.03	7.2	267	188	180	49	42	16	28	11	22	36	212	63	chr2.3	76151952	76154610	-	--	--	K03233 elongation factor 1-gamma | (GenBank) translation elongation factor EF1B, gamma chain (A)	--	XP_003592901.1	EF1G_PRUAV RecName: Full=Elongation factor 1-gamma; Short=EF-1-gamma; AltName: Full=eEF-1B gamma;	At1g09640_2	GO:0004364,glutathione transferase activity; GO:0003746,translation elongation factor activity; GO:0006749,glutathione metabolic process; GO:0003674,molecular_function; GO:0003824,catalytic activity; GO:0016740,transferase activity; GO:0016765,transferase activity, transferring alkyl or aryl (other than methyl) groups; GO:0003676,nucleic acid binding; GO:0003723,RNA binding; GO:0005488,binding; G…	PF00647.19:Elongation factor 1 gamma, conserved domain	--	--	--
MS.gene002065	2.91	3.85	2.75	9.29	7.71	20.56	4.87	11.61	8.72	24.81	16.15	0.25	76	112	88	270	214	591	130	334	238	663	477	6	chr2.3	75651324	75657353	+	--	--	--	--	XP_003592995.2	--	At1g22930	GO:0009506,plasmodesma; GO:0007165,signal transduction; GO:0007154,cell communication; GO:0008150,biological_process; GO:0009987,cellular process; GO:0023052,signaling; GO:0050789,regulation of biological process; GO:0050794,regulation of cellular process; GO:0050896,response to stimulus; GO:0051716,cellular response to stimulus; GO:0065007,biological regulation; GO:0005575,cellular_component; GO…	PF05794.13:T-complex protein 11	--	--	--
MS.gene00211	5.43	2.76	1.63	13.19	17.39	3.62	0	0.16	0	0.71	2.08	0	30	17	11	81	102	22	0	1	0	4	13	0	chr2.1	57802503	57804072	-	--	--	K23260 scopoletin glucosyltransferase [EC:2.4.1.128] | (RefSeq) scopoletin glucosyltransferase-like (A)	ko00940: Phenylpropanoid biosynthesis; ko01110: Biosynthesis of secondary metabolites	XP_003594819.1	SGT1_SOLTU RecName: Full=Solanidine UDP-glucose glucosyltransferase 1 {ECO:0000303|PubMed:9076990}; EC=2.4.1.- {ECO:0000269|PubMed:9076990};	At2g36770	GO:0102202,soladodine glucosyltransferase activity; GO:0035251,UDP-glucosyltransferase activity; GO:0008202,steroid metabolic process; GO:0003674,molecular_function; GO:0003824,catalytic activity; GO:0016740,transferase activity; GO:0016757,transferase activity, transferring glycosyl groups; GO:0016758,transferase activity, transferring hexosyl groups; GO:0008194,UDP-glycosyltransferase activity;…	--	--	--	--
MS.gene002145	0.52	0.84	0.77	0.28	0.1	0.19	10.94	7.02	0.3	0.1	0.09	0	5	9	9	3	1	2	107	74	3	1	1	0	chr2.2	72136387	72138760	+	--	--	K19600 tubby and related proteins | (GenBank) tubby-F-box-like protein (A)	--	XP_003593111.1	TLP8_ORYSJ RecName: Full=Tubby-like F-box protein 8; Short=OsTLP8; AltName: Full=Tubby-like F-box protein 1; Short=OsTLP1;	At1g25280	--	PF01167.18:Tub family	TUB	TF	TUB
MS.gene002148	0.11	0	0	2.84	0	0	11.35	16.17	0.43	0.55	14.76	0.24	1	0	0	28	0	0	103	158	4	5	148	2	chr2.2	72099035	72101382	+	--	--	K17500 integrin-linked kinase-associated serine/threonine phosphatase 2C [EC:3.1.3.16] | (RefSeq) WAT1-related protein At3g18200-like (A)	--	XP_003593115.1	WTR6_ARATH RecName: Full=WAT1-related protein At1g25270;	At1g25270	GO:0016021,integral component of membrane; GO:0005886,plasma membrane; GO:0022857,transmembrane transporter activity; GO:0003674,molecular_function; GO:0005215,transporter activity; GO:0005575,cellular_component; GO:0016020,membrane; GO:0031224,intrinsic component of membrane; GO:0044425,membrane part; GO:0005623,cell; GO:0044464,cell part; GO:0071944,cell periphery	PF00892.20:EamA-like transporter family	--	--	--
MS.gene002153	82.81	83.04	135.1	119.6	32.43	84.37	80.42	18.67	26.35	12.12	1.07	0.65	274	306	547	440	114	307	272	68	91	41	4	2	chr2.2	72015186	72018154	-	--	--	K00416 ubiquinol-cytochrome c reductase subunit 6 | (GenBank) cytochrome B-c1 complex subunit 6 (A)	ko00190: Oxidative phosphorylation; ko01100: Metabolic pathways	XP_003593124.2	QCR61_ARATH RecName: Full=Cytochrome b-c1 complex subunit 6-1, mitochondrial; AltName: Full=Complex III subunit 6-1; AltName: Full=Complex III subunit VI; AltName: Full=Mitochondrial hinge protein; AltName: Full=Ubiquinol-cytochrome c oxidoreductase subunit 6-1;	At1g15120	GO:0005743,mitochondrial inner membrane; GO:0070469,respiratory chain; GO:0008121,ubiquinol-cytochrome-c reductase activity; GO:0006122,mitochondrial electron transport, ubiquinol to cytochrome c; GO:0009055,electron transfer activity; GO:0003674,molecular_function; GO:0003824,catalytic activity; GO:0016491,oxidoreductase activity; GO:0016679,oxidoreductase activity, acting on diphenols and relat…	PF02320.16:Ubiquinol-cytochrome C reductase hinge protein	--	--	--
MS.gene002168	97.85	39.57	40.8	64.5	61.37	44.02	16.71	37.45	9.4	7.66	11.69	3.74	1037	467	529	760	691	513	181	437	104	83	140	37	chr2.2	71849576	71850997	-	--	--	K18823 soyasaponin III rhamnosyltransferase [EC:2.4.1.273] | (RefSeq) soyasaponin III rhamnosyltransferase-like (A)	--	XP_003593143.1	SGT3_SOYBN RecName: Full=Soyasaponin III rhamnosyltransferase; EC=2.4.1.273 {ECO:0000269|PubMed:20350545}; AltName: Full=Soyasaponin glycosyltransferase 3; AltName: Full=UDP-rhamnose:soyasaponin III-rhamnosyltransferase;	At2g22590	GO:0043231,intracellular membrane-bounded organelle; GO:0102241,soyasaponin III rhamnosyltransferase activity; GO:0008194,UDP-glycosyltransferase activity; GO:0003674,molecular_function; GO:0003824,catalytic activity; GO:0016740,transferase activity; GO:0016757,transferase activity, transferring glycosyl groups; GO:0016758,transferase activity, transferring hexosyl groups; GO:0005622,intracellula…	PF00201.18:UDP-glucoronosyl and UDP-glucosyl transferase	--	--	--
MS.gene002180	0.56	1.85	1.3	7.84	6.44	4.95	1.38	0.94	3.86	1.01	0.08	4.22	6	22	17	93	73	58	15	11	43	11	1	42	chr2.2	71707609	71709039	+	--	--	--	--	XP_003593163.1	FBK8_ARATH RecName: Full=F-box/kelch-repeat protein At1g22040;	At1g22040	--	PF01344.25:Kelch motif	--	--	--
MS.gene002218	5.57	3.07	3.83	19.5	19.12	11.46	8.69	38.94	16.65	74.31	96.54	11.51	57	35	48	222	208	129	91	439	178	778	1117	110	chr2.3	73580063	73584200	-	--	--	K14652 3,4-dihydroxy 2-butanone 4-phosphate synthase / GTP cyclohydrolase II [EC:4.1.99.12 3.5.4.25] | (GenBank) 3,4-dihydroxy-2-butanone 4-phosphate synthase (A)	ko00740: Riboflavin metabolism; ko00790: Folate biosynthesis; ko01100: Metabolic pathways; ko01110: Biosynthesis of secondary metabolites; ko01240: Biosynthesis of cofactors	XP_003593237.1	RIBA1_ARATH RecName: Full=Bifunctional riboflavin biosynthesis protein RIBA 1, chloroplastic; Short=AtRIBA1; Includes: RecName: Full=3,4-dihydroxy-2-butanone 4-phosphate synthase; Short=DHBP synthase; EC=4.1.99.12; Includes: RecName: Full=GTP cyclohydrolase-2; EC=3.5.4.25; AltName: Full=GTP cyclohydrolase II; Flags: Precursor;	At5g64300	GO:0009507,chloroplast; GO:0009570,chloroplast stroma; GO:0008686,3,4-dihydroxy-2-butanone-4-phosphate synthase activity; GO:0005525,GTP binding; GO:0003935,GTP cyclohydrolase II activity; GO:0046872,metal ion binding; GO:0009231,riboflavin biosynthetic process; GO:0003674,molecular_function; GO:0003824,catalytic activity; GO:0016829,lyase activity; GO:0016830,carbon-carbon lyase activity; GO:000…	PF00926.19:3,4-dihydroxy-2-butanone 4-phosphate synthase	--	--	--
MS.gene002219	34.97	45.64	58.49	20.11	10.33	12.94	11.54	18.83	14.41	13.52	21.95	5.66	86	125	176	55	27	35	29	51	37	34	61	13	chr2.3	73573651	73573980	-	--	--	--	--	XP_013462418.1	--	--	GO:0016021,integral component of membrane; GO:0005575,cellular_component; GO:0016020,membrane; GO:0031224,intrinsic component of membrane; GO:0044425,membrane part	PF02950.17:Conotoxin	--	--	--
MS.gene002226	263.22	328.41	410.51	52.69	88.67	140.01	140.57	178.68	140.69	76.26	74.97	40.27	665	924	1269	148	238	389	363	497	371	197	214	95	chr2.3	73517100	73518568	+	--	--	K01802 peptidylprolyl isomerase [EC:5.2.1.8] | (GenBank) FKBP-type peptidyl-prolyl cis-trans isomerase (A)	--	PNY05123.1	FKB12_VICFA RecName: Full=Peptidyl-prolyl cis-trans isomerase FKBP12; Short=PPIase FKBP12; EC=5.2.1.8; AltName: Full=12 kDa FK506-binding protein; Short=12 kDa FKBP; AltName: Full=FK506-binding protein 12; Short=VfFKBP12; AltName: Full=FKBP-12; AltName: Full=Immunophilin FKBP12; AltName: Full=Rotamase;	At5g64350	GO:0005737,cytoplasm; GO:0003755,peptidyl-prolyl cis-trans isomerase activity; GO:0003674,molecular_function; GO:0003824,catalytic activity; GO:0016853,isomerase activity; GO:0016859,cis-trans isomerase activity; GO:0140096,catalytic activity, acting on a protein; GO:0005622,intracellular; GO:0005575,cellular_component; GO:0005623,cell; GO:0044424,intracellular part; GO:0044464,cell part	PF00254.28:FKBP-type peptidyl-prolyl cis-trans isomerase	--	--	--
MS.gene002228	10.63	22.67	22.8	0.4	1.67	2.42	9.53	5.63	9.33	4.33	3.14	0	24	57	63	1	4	6	22	14	22	10	8	0	chr2.3	73488854	73489156	+	--	--	--	--	XP_003593258.1	--	--	--	--	--	--	--
MS.gene002243	1.52	1.41	1.72	0.13	0.37	0.36	0.29	0.4	0.19	0.57	1.08	7.71	31	32	43	3	8	8	6	9	4	12	25	147	chr2.3	73344485	73347223	+	--	--	--	--	XP_003593270.1	Y4862_ARATH RecName: Full=Uncharacterized protein At4g38062;	At4g38070_1	--	PF07926.12:TPR/MLP1/MLP2-like protein	--	--	--
MS.gene002258	0.13	0.94	0.54	11.8	3.09	2.5	6.03	14.89	29.53	67.47	85.32	40.04	1	8	5	100	25	21	47	125	235	526	735	285	chr2.3	73221215	73223207	+	--	--	K00083 cinnamyl-alcohol dehydrogenase [EC:1.1.1.195] | (GenBank) cinnamyl alcohol dehydrogenase-like protein (A)	ko00940: Phenylpropanoid biosynthesis; ko01100: Metabolic pathways; ko01110: Biosynthesis of secondary metabolites	XP_003593290.1	CADH1_ARATH RecName: Full=Probable cinnamyl alcohol dehydrogenase 1; Short=AtCAD1; EC=1.1.1.195;	At1g72680	GO:0005829,cytosol; GO:0045551,cinnamyl-alcohol dehydrogenase activity; GO:0016616,oxidoreductase activity, acting on the CH-OH group of donors, NAD or NADP as acceptor; GO:0052747,sinapyl alcohol dehydrogenase activity; GO:0008270,zinc ion binding; GO:0009809,lignin biosynthetic process; GO:0003674,molecular_function; GO:0003824,catalytic activity; GO:0016491,oxidoreductase activity; GO:0016614,…	PF08240.12:Alcohol dehydrogenase GroES-like domain	--	--	--
MS.gene002304	3.58	5.07	2.77	1.19	0.97	1.46	10.32	8.72	20.03	3.22	4.33	2.52	38	60	36	14	11	17	112	102	222	35	52	25	chr2.3	72690255	72694673	-	--	--	--	--	XP_003593372.1	TAUE2_ARATH RecName: Full=Sulfite exporter TauE/SafE family protein 2 {ECO:0000312|EMBL:AEE33881.1};	At1g61740	GO:0031464,Cul4A-RING E3 ubiquitin ligase complex; GO:0016021,integral component of membrane; GO:0016567,protein ubiquitination; GO:0008152,metabolic process; GO:0006464,cellular protein modification process; GO:0006807,nitrogen compound metabolic process; GO:0008150,biological_process; GO:0009987,cellular process; GO:0019538,protein metabolic process; GO:0032446,protein modification by small pro…	PF01925.19:Sulfite exporter TauE/SafE	--	--	--
MS.gene00231	28.03	27.96	288.27	24.7	32.24	12.1	415.43	313.94	232.16	30.18	298.89	787.09	99	110	1246	97	121	47	1500	1221	856	109	1193	2596	chr2.1	57599396	57600402	-	--	--	K05387 glutamate receptor, ionotropic, plant | (RefSeq) LOW QUALITY PROTEIN: glutamate receptor 2.3-like (A)	--	XP_003594849.1	ABR17_PEA RecName: Full=ABA-responsive protein ABR17;	--	GO:0010427,abscisic acid binding; GO:0004864,protein phosphatase inhibitor activity; GO:0038023,signaling receptor activity; GO:0009738,abscisic acid-activated signaling pathway; GO:0006952,defense response; GO:0009607,response to biotic stimulus; GO:0003674,molecular_function; GO:0005488,binding; GO:0008289,lipid binding; GO:0019840,isoprenoid binding; GO:0031406,carboxylic acid binding; GO:0033…	PF00407.19:Pathogenesis-related protein Bet v I family	--	--	--
MS.gene002353	5.27	6.25	1.64	0.19	0	0.19	4.85	0.38	0.51	5.98	1.59	0	50	66	19	2	0	2	47	4	5	58	17	0	chr2.3	72166800	72169205	-	--	--	K15014 solute carrier family 29 (equilibrative nucleoside transporter), member 1/2/3 | (GenBank) equilibrative nucleoside transporter 6 (A)	--	XP_013462464.1	ENT3_ARATH RecName: Full=Equilibrative nucleotide transporter 3; Short=AtENT3; AltName: Full=Nucleoside transporter ENT3; AltName: Full=Protein FLUOROURIDINE RESISTANT 1;	At4g05120	GO:0016021,integral component of membrane; GO:0005886,plasma membrane; GO:0005337,nucleoside transmembrane transporter activity; GO:0015858,nucleoside transport; GO:0003674,molecular_function; GO:0005215,transporter activity; GO:0022857,transmembrane transporter activity; GO:0015932,nucleobase-containing compound transmembrane transporter activity; GO:1901505,carbohydrate derivative transmembrane…	PF01733.18:Nucleoside transporter	--	--	--
MS.gene002382	716.55	304.91	391.66	42.97	155.22	140	104.78	89.82	27.69	18.75	54.4	161.96	2355	1116	1575	157	542	506	352	325	95	63	202	497	chr2.4	71809184	71809624	+	--	--	K02898 large subunit ribosomal protein L26e | (GenBank) 60S ribosomal protein L26-1 (A)	ko03010: Ribosome	XP_003593461.1	RL262_ARATH RecName: Full=60S ribosomal protein L26-2;	At5g67510	GO:0022625,cytosolic large ribosomal subunit; GO:0022626,cytosolic ribosome; GO:0009536,plastid; GO:0042788,polysomal ribosome; GO:0003723,RNA binding; GO:0003735,structural constituent of ribosome; GO:0002181,cytoplasmic translation; GO:0042273,ribosomal large subunit biogenesis; GO:0003674,molecular_function; GO:0003676,nucleic acid binding; GO:0005488,binding; GO:0097159,organic cyclic compoun…	PF16906.5:Ribosomal proteins L26 eukaryotic, L24P archaeal	--	--	--
MS.gene002414	9.65	7	17.88	19.2	8.59	8.7	70.88	45.29	25.54	8.4	3.06	0.95	109	88	247	241	103	108	818	563	301	97	39	10	chr2.4	71375946	71380588	+	--	--	K01466 allantoinase [EC:3.5.2.5] | (GenBank) allantoinase (A)	ko00230: Purine metabolism; ko01100: Metabolic pathways	XP_003593522.1	ALN_ARATH RecName: Full=Allantoinase; Short=AtALN; EC=3.5.2.5;	YIR027c	GO:0005737,cytoplasm; GO:0005783,endoplasmic reticulum; GO:0004038,allantoinase activity; GO:0050897,cobalt ion binding; GO:0008270,zinc ion binding; GO:0000256,allantoin catabolic process; GO:0006995,cellular response to nitrogen starvation; GO:0006145,purine nucleobase catabolic process; GO:0010136,ureide catabolic process; GO:0003674,molecular_function; GO:0003824,catalytic activity; GO:001678…	PF01979.20:Amidohydrolase family	--	--	--
MS.gene002426	3.24	6.44	6.43	10.61	38.32	37.87	7.7	9.25	21.94	2.49	3.07	1.24	14	31	34	51	176	180	34	44	99	11	15	5	chr2.4	71276334	71277010	+	--	--	K04645 clathrin light chain B | (RefSeq) clathrin light chain 2 (A)	ko04144: Endocytosis	XP_003593538.1	CLC1_ORYSJ RecName: Full=Clathrin light chain 1;	At2g20760	GO:0030132,clathrin coat of coated pit; GO:0030130,clathrin coat of trans-Golgi network vesicle; GO:0030125,clathrin vesicle coat; GO:0005886,plasma membrane; GO:0032050,clathrin heavy chain binding; GO:0005198,structural molecule activity; GO:0048268,clathrin coat assembly; GO:0072583,clathrin-dependent endocytosis; GO:0006886,intracellular protein transport; GO:0005515,protein binding; GO:00036…	PF01086.17:Clathrin light chain	--	--	--
MS.gene002470	116.22	112.26	248.1	113.09	72.03	82.65	54.65	33.61	21.34	56.57	128.61	52.71	647	696	1690	700	426	506	311	206	124	322	809	274	chr2.1	70954343	70957260	-	--	--	K02991 small subunit ribosomal protein S6e | (GenBank) 40S ribosomal protein S6-2 (A)	ko03010: Ribosome	XP_003593601.1	RS62_ARATH RecName: Full=40S ribosomal protein S6-2; AltName: Full=Protein EMBRYO DEFECTIVE 3010;	At5g10360	GO:0005829,cytosol; GO:0022626,cytosolic ribosome; GO:0022627,cytosolic small ribosomal subunit; GO:0005886,plasma membrane; GO:0009506,plasmodesma; GO:0042788,polysomal ribosome; GO:0003729,mRNA binding; GO:0003735,structural constituent of ribosome; GO:0006412,translation; GO:0003674,molecular_function; GO:0003676,nucleic acid binding; GO:0003723,RNA binding; GO:0005488,binding; GO:0097159,orga…	PF01092.19:Ribosomal protein S6e	--	--	--
MS.gene002499	0.39	1.15	0.53	0.23	0.6	4.09	9.81	7.82	3.32	2.77	0.8	0	3	10	5	2	5	35	78	67	27	22	7	0	chr2.1	70584382	70586256	-	--	--	K09510 DnaJ homolog subfamily B member 4 | (GenBank) DnaJ heat shock family protein (A)	--	XP_003593642.1	DNJH_ATRNU RecName: Full=DnaJ protein homolog ANJ1; Flags: Precursor;	At2g20560	GO:0016020,membrane; GO:0005524,ATP binding; GO:0030544,Hsp70 protein binding; GO:0046872,metal ion binding; GO:0051082,unfolded protein binding; GO:0006457,protein folding; GO:0009408,response to heat; GO:0000166,nucleotide binding; GO:0003674,molecular_function; GO:0005488,binding; GO:0008144,drug binding; GO:0017076,purine nucleotide binding; GO:0030554,adenyl nucleotide binding; GO:0032553,ri…	PF01556.18:DnaJ C terminal domain	--	--	--
MS.gene002508	0.73	1.96	0.95	2.22	3.55	9.64	4.55	5.8	6.4	20.45	3.98	25.04	5	15	8	17	26	73	32	44	46	144	31	161	chr2.1	70515170	70517674	-	--	--	--	--	XP_003593656.1	NAC73_ARATH RecName: Full=NAC domain-containing protein 73 {ECO:0000303|PubMed:15029955}; Short=ANAC073 {ECO:0000303|PubMed:15029955}; AltName: Full=Protein SECONDARY WALL-ASSOCIATED NAC DOMAIN PROTEIN 2 {ECO:0000303|PubMed:18952777};	At4g28500	GO:0005634,nucleus; GO:0003700,DNA-binding transcription factor activity; GO:0000976,transcription regulatory region sequence-specific DNA binding; GO:0045893,positive regulation of transcription, DNA-templated; GO:2000652,regulation of secondary cell wall biogenesis; GO:0006355,regulation of transcription, DNA-templated; GO:0140110,transcription regulator activity; GO:0003674,molecular_function;…	PF02365.15:No apical meristem (NAM) protein	NAC	TF	NAC
MS.gene002552	0.15	4.52	4.36	9.25	3.23	5.61	2.31	111.42	30.3	16.77	9.78	5.47	2	66	70	135	45	81	31	1610	415	225	145	67	chr2.1	69932998	69936395	-	--	--	K01568 pyruvate decarboxylase [EC:4.1.1.1] | (GenBank) pyruvate decarboxylase (A)	ko00010: Glycolysis / Gluconeogenesis; ko01100: Metabolic pathways; ko01110: Biosynthesis of secondary metabolites	XP_003593734.1	PDC1_PEA RecName: Full=Pyruvate decarboxylase 1; Short=PDC; EC=4.1.1.1;	At5g54960	GO:0000287,magnesium ion binding; GO:0004737,pyruvate decarboxylase activity; GO:0030976,thiamine pyrophosphate binding; GO:0003674,molecular_function; GO:0005488,binding; GO:0046872,metal ion binding; GO:0043167,ion binding; GO:0043169,cation binding; GO:0003824,catalytic activity; GO:0016829,lyase activity; GO:0016830,carbon-carbon lyase activity; GO:0016831,carboxy-lyase activity; GO:0019842,v…	PF02776.18:Thiamine pyrophosphate enzyme, N-terminal TPP binding domain	--	--	--
MS.gene002566	0	0.18	0.33	0.73	0.48	0.74	0.3	4.78	3.97	2.18	1.07	0	0	2	4	8	5	8	3	52	41	22	12	0	chr2.1	69693698	69696782	+	--	--	K08332 vacuolar protein 8 | (RefSeq) LOW QUALITY PROTEIN: U-box domain-containing protein 3 (A)	--	XP_003593767.1	PUB45_ARATH RecName: Full=U-box domain-containing protein 45; EC=2.3.2.27; AltName: Full=Plant U-box protein 45; AltName: Full=RING-type E3 ubiquitin transferase PUB45 {ECO:0000305};	At2g27430	GO:0005737,cytoplasm; GO:0005634,nucleus; GO:0070696,transmembrane receptor protein serine/threonine kinase binding; GO:0004842,ubiquitin-protein transferase activity; GO:0016567,protein ubiquitination; GO:0005515,protein binding; GO:0003674,molecular_function; GO:0005102,signaling receptor binding; GO:0005488,binding; GO:0033612,receptor serine/threonine kinase binding; GO:0003824,catalytic acti…	PF00514.23:Armadillo/beta-catenin-like repeat	--	--	--
MS.gene002567	0	0	0	1.48	4.85	2.44	1.61	3.74	2.57	0.6	0.55	0	0	0	0	8	25	13	8	20	13	3	3	0	chr2.1	69678484	69680669	+	--	--	K22484 transcriptional regulator CBF1 | (RefSeq) transcription factor bHLH106 (A)	--	XP_003593769.1	BH030_ARATH RecName: Full=Transcription factor bHLH30; AltName: Full=Basic helix-loop-helix protein 30; Short=AtbHLH30; Short=bHLH 30; AltName: Full=Transcription factor EN 53; AltName: Full=bHLH transcription factor bHLH030;	At1g68810	GO:0005634,nucleus; GO:0003677,DNA binding; GO:0003700,DNA-binding transcription factor activity; GO:0046983,protein dimerization activity; GO:0006355,regulation of transcription, DNA-templated; GO:0003674,molecular_function; GO:0003676,nucleic acid binding; GO:0005488,binding; GO:0097159,organic cyclic compound binding; GO:1901363,heterocyclic compound binding; GO:0140110,transcription regulator…	PF00010.26:Helix-loop-helix DNA-binding domain	bHLH	TF	bHLH
MS.gene002599	78.03	3.38	33.97	2.51	3.09	47.52	2.14	2.87	3.03	22.7	44.96	2.73	642	31	342	23	27	430	18	26	26	191	418	21	chr2.1	69285076	69288735	-	--	--	K14502 protein brassinosteroid insensitive 2 [EC:2.7.11.1] | (GenBank) shaggy-like kinase dzeta (A)	ko04075: Plant hormone signal transduction	XP_013462587.1	KSG7_ARATH RecName: Full=Shaggy-related protein kinase eta {ECO:0000303|PubMed:9611268}; EC=2.7.11.1 {ECO:0000269|PubMed:11847343, ECO:0000269|PubMed:12428015, ECO:0000269|PubMed:22466366}; AltName: Full=ASK-eta {ECO:0000303|PubMed:10080716}; AltName: Full=Protein BRASSINOSTEROID INSENSITIVE 2 {ECO:0000303|PubMed:11847343}; AltName: Full=Protein ULTRACURVATA 1 {ECO:0000303|PubMed:11820813}; AltNa…	At4g18710	GO:0005938,cell cortex; GO:0005737,cytoplasm; GO:0005829,cytosol; GO:0005634,nucleus; GO:0005886,plasma membrane; GO:0005524,ATP binding; GO:0042802,identical protein binding; GO:0004672,protein kinase activity; GO:0106310,NA; GO:0004674,protein serine/threonine kinase activity; GO:0106311,NA; GO:0009742,brassinosteroid mediated signaling pathway; GO:0009729,detection of brassinosteroid stimulus;…	PF00069.25:Protein kinase domain	--	--	--
MS.gene002609	2.72	4.13	4.27	4.07	2.49	2.85	20.38	5.19	27.23	10.9	10.61	21.64	39	66	75	65	38	45	299	82	408	160	172	290	chr2.1	69137763	69145659	+	--	--	K12355 coniferyl-aldehyde dehydrogenase [EC:1.2.1.68] | (GenBank) NAD-dependent aldehyde dehydrogenase family protein (A)	ko00940: Phenylpropanoid biosynthesis	XP_013462597.1	--	--	--	--	--	--	--
MS.gene002661	0	0.28	0.05	0.06	0	1.4	125.9	6.12	1.54	1.93	0.27	0	0	5	1	1	0	25	2083	109	26	32	5	0	chr2.1	68643984	68646369	-	--	--	K01230 mannosyl-oligosaccharide alpha-1,2-mannosidase [EC:3.2.1.113] | (RefSeq) mannosyl-oligosaccharide 1,2-alpha-mannosidase MNS1 (A)	ko00510: N-Glycan biosynthesis; ko00513: Various types of N-glycan biosynthesis; ko01100: Metabolic pathways; ko04141: Protein processing in endoplasmic reticulum	XP_020203984.1	--	At3g17450	GO:0005634,nucleus; GO:0003677,DNA binding; GO:0008878,glucose-1-phosphate adenylyltransferase activity; GO:0046872,metal ion binding; GO:0046983,protein dimerization activity; GO:0005978,glycogen biosynthetic process; GO:0003674,molecular_function; GO:0003676,nucleic acid binding; GO:0005488,binding; GO:0097159,organic cyclic compound binding; GO:1901363,heterocyclic compound binding; GO:0003824…	PF04937.15:Protein of unknown function (DUF 659)	--	--	--
MS.gene002694	2.31	3.14	1.53	1.24	3.06	3.04	0.43	0.4	0.85	0.96	1.18	0	47	71	38	28	66	68	9	9	18	20	27	0	chr2.1	68173714	68178866	+	--	--	K14486 auxin response factor | (RefSeq) auxin response factor 5 isoform X1 (A)	ko04075: Plant hormone signal transduction	XP_003593869.1	ARFF_ARATH RecName: Full=Auxin response factor 6;	At1g30330	GO:0005634,nucleus; GO:0003677,DNA binding; GO:0003700,DNA-binding transcription factor activity; GO:0009734,auxin-activated signaling pathway; GO:0009908,flower development; GO:0009733,response to auxin; GO:0003674,molecular_function; GO:0003676,nucleic acid binding; GO:0005488,binding; GO:0097159,organic cyclic compound binding; GO:1901363,heterocyclic compound binding; GO:0140110,transcription…	PF06507.13:Auxin response factor	B3-ARF	TF	B3->B3-ARF
MS.gene002723	15.25	18.86	7.2	17.68	27.75	26.5	19.89	30.47	23.05	128.91	163.14	382.51	45	62	26	58	87	86	60	99	71	389	544	1054	chr2.1	67833875	67836783	+	--	--	K13464 jasmonate ZIM domain-containing protein | (RefSeq) protein TIFY 9 (A)	ko04075: Plant hormone signal transduction	XP_003593904.2	TIF5A_ARATH RecName: Full=Protein TIFY 5A {ECO:0000303|PubMed:17499004}; AltName: Full=Jasmonate ZIM domain-containing protein 8 {ECO:0000303|PubMed:17637675};	At2g34600	GO:0005634,nucleus; GO:0006952,defense response; GO:0031347,regulation of defense response; GO:2000022,regulation of jasmonic acid mediated signaling pathway; GO:0009611,response to wounding; GO:0006950,response to stress; GO:0008150,biological_process; GO:0050896,response to stimulus; GO:0048583,regulation of response to stimulus; GO:0050789,regulation of biological process; GO:0065007,biologica…	PF06200.14:tify domain	Tify	TF	Tify
MS.gene002745	51.98	82.73	48.83	24.7	115.81	96.42	17.66	26.43	25.56	27.36	59.22	37.18	602	1067	692	318	1425	1228	209	337	309	324	775	402	chr2.1	67518421	67519974	+	--	--	K09832 sterol 22-desaturase [EC:1.14.19.41] | (GenBank) cytochrome P450 family monooxygenase (A)	ko00100: Steroid biosynthesis; ko01100: Metabolic pathways; ko01110: Biosynthesis of secondary metabolites	XP_003593948.2	C7111_SOLLC RecName: Full=Cytochrome P450 710A11 {ECO:0000303|PubMed:16531502}; EC=1.14.19.41 {ECO:0000269|PubMed:16531502}; AltName: Full=C-22 sterol desaturase {ECO:0000303|PubMed:16531502};	At2g34500	GO:0016021,integral component of membrane; GO:0020037,heme binding; GO:0005506,iron ion binding; GO:0004497,monooxygenase activity; GO:0016491,oxidoreductase activity; GO:0016705,oxidoreductase activity, acting on paired donors, with incorporation or reduction of molecular oxygen; GO:0016126,sterol biosynthetic process; GO:0016125,sterol metabolic process; GO:0003674,molecular_function; GO:000548…	PF00067.22:Cytochrome P450	--	--	--
MS.gene002784	1.2	2.51	1.96	0.6	2.76	1.82	20.06	8.22	23.98	4.95	10.37	0	9	21	18	5	22	15	154	68	188	38	88	0	chr2.1	67086016	67089458	+	--	--	K19600 tubby and related proteins | (GenBank) tubby-F-box-like protein (A)	--	XP_003594006.1	TLP3_ARATH RecName: Full=Tubby-like F-box protein 3; Short=AtTLP3;	At2g47900	GO:0005654,nucleoplasm; GO:0005886,plasma membrane; GO:0009536,plastid; GO:0005622,intracellular; GO:0005575,cellular_component; GO:0005623,cell; GO:0005634,nucleus; GO:0043231,intracellular membrane-bounded organelle; GO:0031974,membrane-enclosed lumen; GO:0031981,nuclear lumen; GO:0043226,organelle; GO:0043227,membrane-bounded organelle; GO:0043229,intracellular organelle; GO:0043233,organelle …	PF01167.18:Tub family	TUB	TF	TUB
MS.gene002820	37.7	12.05	24.02	178.73	135.32	117.66	43.45	28.15	17.75	83.74	97.27	0	118	42	92	622	450	405	139	97	58	268	344	0	chr2.1	66746716	66747441	+	--	--	K07305 peptide-methionine (R)-S-oxide reductase [EC:1.8.4.12] | (GenBank) methionine sulfoxide reductase B 2 (A)	--	XP_003594065.1	MSRB5_ORYSJ RecName: Full=Peptide methionine sulfoxide reductase B5; Short=OsMSRB5; EC=1.8.4.12; AltName: Full=Peptide-methionine (R)-S-oxide reductase;	At4g04830	GO:0005829,cytosol; GO:0046872,metal ion binding; GO:0033743,peptide-methionine (R)-S-oxide reductase activity; GO:0030091,protein repair; GO:0006979,response to oxidative stress; GO:0003674,molecular_function; GO:0005488,binding; GO:0043167,ion binding; GO:0043169,cation binding; GO:0003824,catalytic activity; GO:0016491,oxidoreductase activity; GO:0016667,oxidoreductase activity, acting on a su…	PF01641.18:SelR domain	--	--	--
MS.gene002836	18.56	15.63	23.43	4.69	3.73	2.94	12.95	14.11	8.69	4.38	17.62	6.36	178	167	275	50	38	31	127	149	87	43	191	57	chr2.1	66516800	66519925	+	--	--	K01915 glutamine synthetase [EC:6.3.1.2] | (GenBank) glutamine synthetase domain protein (A)	ko00220: Arginine biosynthesis; ko00250: Alanine, aspartate and glutamate metabolism; ko00630: Glyoxylate and dicarboxylate metabolism; ko00910: Nitrogen metabolism; ko01100: Metabolic pathways; ko01230: Biosynthesis of amino acids	Q9XQ94.1	GLNA2_MEDSA RecName: Full=Glutamine synthetase leaf isozyme, chloroplastic; EC=6.3.1.2; AltName: Full=GS2; AltName: Full=Glutamate--ammonia ligase; Flags: Precursor;	At5g35630	GO:0009507,chloroplast; GO:0005524,ATP binding; GO:0004356,glutamate-ammonia ligase activity; GO:0006542,glutamine biosynthetic process; GO:0000166,nucleotide binding; GO:0003674,molecular_function; GO:0005488,binding; GO:0008144,drug binding; GO:0017076,purine nucleotide binding; GO:0030554,adenyl nucleotide binding; GO:0032553,ribonucleotide binding; GO:0032555,purine ribonucleotide binding; GO…	PF00120.24:Glutamine synthetase, catalytic domain	--	--	--
MS.gene002859	0.42	0.25	0.23	3.91	12.01	14.41	0.14	1.66	0.27	8.64	13.4	0.9	3	2	2	31	91	113	1	13	2	63	108	6	chr2.1	66262477	66263433	-	--	--	--	--	XP_003594125.1	--	At1g55230	GO:0016021,integral component of membrane; GO:0005575,cellular_component; GO:0016020,membrane; GO:0031224,intrinsic component of membrane; GO:0044425,membrane part	PF04819.12:Family of unknown function (DUF716)	--	--	--
MS.gene002877	8.47	4.29	0.53	0	0	0.2	7.65	0.2	0.62	0	0	0	39	22	3	0	0	1	36	1	3	0	0	0	chr2.1	66001266	66003330	+	--	--	K07952 ADP-ribosylation factor related protein 1 | (GenBank) ADP-ribosylation factor-like protein A1D (A)	--	XP_013462732.1	ARF_VIGUN RecName: Full=ADP-ribosylation factor;	At5g52210	GO:0005794,Golgi apparatus; GO:0005525,GTP binding; GO:0015031,protein transport; GO:0016192,vesicle-mediated transport; GO:0000166,nucleotide binding; GO:0001882,nucleoside binding; GO:0001883,purine nucleoside binding; GO:0003674,molecular_function; GO:0005488,binding; GO:0017076,purine nucleotide binding; GO:0019001,guanyl nucleotide binding; GO:0032549,ribonucleoside binding; GO:0032550,purin…	PF00025.21:ADP-ribosylation factor family	--	--	--
MS.gene002888	3.96	13.6	17.78	0.55	1.05	1.11	4.97	4.06	2.63	5.37	4.32	5.77	39	149	214	6	11	12	50	44	27	54	48	53	chr2.1	65823978	65825297	-	--	--	K22683 aspartyl protease family protein [EC:3.4.23.-] | (RefSeq) aspartyl protease family protein 2-like (A)	--	XP_013462745.1	GIP2_NICBE RecName: Full=Probable aspartic proteinase GIP2 {ECO:0000305}; EC=3.4.23.- {ECO:0000305}; AltName: Full=Glucanase inhibitor protein 2 {ECO:0000303|PubMed:28082413}; Short=NbGIP2 {ECO:0000303|PubMed:28082413}; Flags: Precursor;	At1g03220	GO:0048046,apoplast; GO:0004190,aspartic-type endopeptidase activity; GO:0006952,defense response; GO:0003674,molecular_function; GO:0003824,catalytic activity; GO:0004175,endopeptidase activity; GO:0008233,peptidase activity; GO:0070011,peptidase activity, acting on L-amino acid peptides; GO:0016787,hydrolase activity; GO:0070001,aspartic-type peptidase activity; GO:0140096,catalytic activity, a…	PF14541.6:Xylanase inhibitor C-terminal	--	--	--
MS.gene00289	1.21	4.68	6.54	0.5	0.18	0.68	17.74	0.59	9.18	0.82	1.56	2.19	13	56	86	6	2	8	195	7	103	9	19	22	chr2.2	52635741	52642999	+	--	--	K12862 pleiotropic regulator 1 | (GenBank) PP1/PP2A phosphatase pleiotropic regulator PRL1 (A)	ko03040: Spliceosome	XP_013463226.1	PRL2_ARATH RecName: Full=Protein pleiotropic regulator PRL2;	At3g16650	GO:0071013,catalytic step 2 spliceosome; GO:0080008,Cul4-RING E3 ubiquitin ligase complex; GO:0000974,Prp19 complex; GO:0000398,mRNA splicing, via spliceosome; GO:0000375,RNA splicing, via transesterification reactions; GO:0000377,RNA splicing, via transesterification reactions with bulged adenosine as nucleophile; GO:0008152,metabolic process; GO:0006139,nucleobase-containing compound metabolic …	PF00400.32:WD domain, G-beta repeat	--	--	--
MS.gene002893	3.54	5.98	2.21	2.81	4.21	1.42	17.81	7.18	22.22	44.25	35.44	63.84	34	64	26	30	43	15	175	76	223	435	385	573	chr2.1	65748672	65749961	+	--	--	K22683 aspartyl protease family protein [EC:3.4.23.-] | (RefSeq) protein ASPARTIC PROTEASE IN GUARD CELL 1 (A)	--	XP_013462752.1	GIP2_NICBE RecName: Full=Probable aspartic proteinase GIP2 {ECO:0000305}; EC=3.4.23.- {ECO:0000305}; AltName: Full=Glucanase inhibitor protein 2 {ECO:0000303|PubMed:28082413}; Short=NbGIP2 {ECO:0000303|PubMed:28082413}; Flags: Precursor;	At1g03230	GO:0048046,apoplast; GO:0004190,aspartic-type endopeptidase activity; GO:0006952,defense response; GO:0003674,molecular_function; GO:0003824,catalytic activity; GO:0004175,endopeptidase activity; GO:0008233,peptidase activity; GO:0070011,peptidase activity, acting on L-amino acid peptides; GO:0016787,hydrolase activity; GO:0070001,aspartic-type peptidase activity; GO:0140096,catalytic activity, a…	PF14541.6:Xylanase inhibitor C-terminal	--	--	--
MS.gene002964	42.54	25.64	60.12	221.6	151.29	116.91	40.31	135.53	51.15	165.85	231.19	128.43	447	300	773	2589	1689	1351	433	1568	561	1782	2745	1260	chr2.4	63825599	63828026	-	--	--	K05907 adenylyl-sulfate reductase (glutathione) [EC:1.8.4.9] | (GenBank) 5'-adenylylsulfate reductase (A)	ko00920: Sulfur metabolism; ko01100: Metabolic pathways	XP_013462840.1	APR3_ARATH RecName: Full=5'-adenylylsulfate reductase 3, chloroplastic; EC=1.8.4.9; AltName: Full=3'-phosphoadenosine-5'-phosphosulfate reductase homolog 26; Short=PAPS reductase homolog 26; Short=Prh-26; AltName: Full=Adenosine 5'-phosphosulfate 5'-adenylylsulfate sulfotransferase 3; Short=APS sulfotransferase 3; AltName: Full=Thioredoxin-independent APS reductase 3; Flags: Precursor;	At4g21990_1	GO:0009507,chloroplast; GO:0051539,4 iron, 4 sulfur cluster binding; GO:0033741,adenylyl-sulfate reductase (glutathione) activity; GO:0009973,adenylyl-sulfate reductase activity; GO:0046872,metal ion binding; GO:0019344,cysteine biosynthetic process; GO:0000103,sulfate assimilation; GO:0019419,sulfate reduction; GO:0003674,molecular_function; GO:0005488,binding; GO:0048037,cofactor binding; GO:00…	PF01507.19:Phosphoadenosine phosphosulfate reductase family	--	--	--
MS.gene002989	0	1.1	1	2.53	1.96	1.33	2.63	6.66	7.02	2.15	3.89	14.66	0	10	10	23	17	12	22	60	60	18	36	112	chr2.2	62032956	62034132	+	--	--	K20716 mitogen-activated protein kinase kinase kinase 17/18 | (GenBank) MAP kinase kinase kinase (A)	ko04016: MAPK signaling pathway - plant	XP_013462867.1	M3K18_ARATH RecName: Full=Mitogen-activated protein kinase kinase kinase 18 {ECO:0000303|PubMed:26443375}; EC=2.7.11.25 {ECO:0000255|PROSITE-ProRule:PRU00159, ECO:0000269|PubMed:25680457, ECO:0000269|PubMed:26443375};	At1g05100	GO:0005634,nucleus; GO:0005524,ATP binding; GO:0004709,MAP kinase kinase kinase activity; GO:0004672,protein kinase activity; GO:0019901,protein kinase binding; GO:0106310,NA; GO:0004674,protein serine/threonine kinase activity; GO:0106311,NA; GO:0009738,abscisic acid-activated signaling pathway; GO:1902457,negative regulation of stomatal opening; GO:0009789,positive regulation of abscisic acid-a…	PF00069.25:Protein kinase domain	--	--	--
MS.gene002992	14.91	32.83	13.35	41.16	36.43	43.84	28.24	39.26	43.84	201.26	95.94	816.42	188	461	206	577	488	608	364	545	577	2595	1367	9612	chr2.2	62002180	62004798	+	--	--	--	--	XP_013462871.1	WRKY6_ARATH RecName: Full=WRKY transcription factor 6 {ECO:0000303|PubMed:11722756}; AltName: Full=WRKY DNA-binding protein 6 {ECO:0000303|PubMed:11722756}; Short=AtWRKY6 {ECO:0000303|PubMed:11722756};	At1g62300	GO:0005634,nucleus; GO:0003700,DNA-binding transcription factor activity; GO:0000976,transcription regulatory region sequence-specific DNA binding; GO:0080169,cellular response to boron-containing substance deprivation; GO:0016036,cellular response to phosphate starvation; GO:0009873,ethylene-activated signaling pathway; GO:0045892,negative regulation of transcription, DNA-templated; GO:0010200,r…	PF03106.15:WRKY DNA -binding domain	WRKY	TF	WRKY
MS.gene00300	2.29	2.14	8.32	0.78	6.58	2.95	1.07	0.21	0.22	0.16	0.26	0.04	69	72	307	26	211	98	33	7	7	5	9	1	chr2.1	56638271	56646817	+	--	--	K05665 ATP-binding cassette, subfamily C (CFTR/MRP), member 1 [EC:7.6.2.3] | (RefSeq) ABC transporter C family member 14-like (A)	ko02010: ABC transporters	XP_013463245.1	AB14C_ARATH RecName: Full=ABC transporter C family member 14; Short=ABC transporter ABCC.14; Short=AtABCC14; EC=7.6.2.2; AltName: Full=ATP-energized glutathione S-conjugate pump 10; AltName: Full=Glutathione S-conjugate-transporting ATPase 10; AltName: Full=Multidrug resistance-associated protein 10;	At3g62700	GO:0005829,cytosol; GO:0005794,Golgi apparatus; GO:0016021,integral component of membrane; GO:0016020,membrane; GO:0000325,plant-type vacuole; GO:0005774,vacuolar membrane; GO:0005773,vacuole; GO:0008559,xenobiotic transmembrane transporting ATPase activity; GO:0005524,ATP binding; GO:0042626,ATPase activity, coupled to transmembrane movement of substances; GO:0055085,transmembrane transport; GO:…	PF00664.23:ABC transporter transmembrane region	--	--	--
MS.gene003021	23.04	21.75	17.6	1.5	6.86	4.18	1.24	14.52	1.37	7.74	6.73	22.13	291	306	272	21	92	58	16	202	18	100	96	261	chr2.2	61572902	61579056	+	--	--	K00895 diphosphate-dependent phosphofructokinase [EC:2.7.1.90] | (GenBank) pyrophosphate-fructose-6-phosphate 1-phosphotransferase (A)	ko00010: Glycolysis / Gluconeogenesis; ko00030: Pentose phosphate pathway; ko00051: Fructose and mannose metabolism; ko01100: Metabolic pathways; ko01110: Biosynthesis of secondary metabolites	XP_003594152.1	PFPB_RICCO RecName: Full=Pyrophosphate--fructose 6-phosphate 1-phosphotransferase subunit beta {ECO:0000255|HAMAP-Rule:MF_03185}; Short=PFP {ECO:0000255|HAMAP-Rule:MF_03185}; EC=2.7.1.90 {ECO:0000255|HAMAP-Rule:MF_03185}; AltName: Full=6-phosphofructokinase, pyrophosphate dependent {ECO:0000255|HAMAP-Rule:MF_03185}; AltName: Full=PPi-PFK {ECO:0000255|HAMAP-Rule:MF_03185}; AltName: Full=Pyrophosph…	At1g12000	GO:0005737,cytoplasm; GO:0003872,6-phosphofructokinase activity; GO:0005524,ATP binding; GO:0047334,diphosphate-fructose-6-phosphate 1-phosphotransferase activity; GO:0046872,metal ion binding; GO:0006002,fructose 6-phosphate metabolic process; GO:0003674,molecular_function; GO:0003824,catalytic activity; GO:0008443,phosphofructokinase activity; GO:0016301,kinase activity; GO:0016740,transferase …	PF00365.20:Phosphofructokinase	--	--	--
MS.gene003028	6.21	11.53	17.26	41.63	14.33	7.25	33.33	52.57	84.91	56.91	28.22	13.42	60	124	204	447	147	77	329	559	856	562	308	121	chr2.2	61473095	61475637	-	--	--	--	--	XP_003594165.1	--	At3g20300	GO:0016021,integral component of membrane; GO:0005575,cellular_component; GO:0016020,membrane; GO:0031224,intrinsic component of membrane; GO:0044425,membrane part	PF12056.8:Protein of unknown function (DUF3537)	--	--	--
MS.gene003087	23.29	47.13	34.44	88.11	42.8	18.82	91.5	202.11	156.53	122.55	42.2	322.27	63	142	114	265	123	56	253	602	442	339	129	814	14610	19079	19441	+	--	--	K13899 cystatin-C | (RefSeq) cysteine proteinase inhibitor 1-like (A)	--	XP_003594241.1	CYT5_ARATH RecName: Full=Cysteine proteinase inhibitor 5; Short=AtCYS-5; Flags: Precursor;	At5g47550	GO:0005618,cell wall; GO:0005576,extracellular region; GO:0004869,cysteine-type endopeptidase inhibitor activity; GO:0034605,cellular response to heat; GO:0006952,defense response; GO:0010030,positive regulation of seed germination; GO:0003674,molecular_function; GO:0004857,enzyme inhibitor activity; GO:0004866,endopeptidase inhibitor activity; GO:0061135,endopeptidase regulator activity; GO:0098…	PF16845.5:Aspartic acid proteinase inhibitor	--	--	--
MS.gene003101	0.3	0.2	0.06	0.07	0.21	0.14	1.03	6.33	0.5	1.03	1.26	2.17	4	3	1	1	3	2	14	93	7	14	19	27	chr2.2	60608534	60610324	+	--	--	K14494 DELLA protein | (RefSeq) DELLA protein GAI-like (A)	ko04075: Plant hormone signal transduction	XP_003594263.1	SCL13_ARATH RecName: Full=Scarecrow-like protein 13; Short=AtSCL13; AltName: Full=GRAS family protein 24; Short=AtGRAS-24;	At5g48150	GO:0005737,cytoplasm; GO:0005634,nucleus; GO:0003700,DNA-binding transcription factor activity; GO:0043565,sequence-specific DNA binding; GO:0006355,regulation of transcription, DNA-templated; GO:0140110,transcription regulator activity; GO:0003674,molecular_function; GO:0003676,nucleic acid binding; GO:0003677,DNA binding; GO:0005488,binding; GO:0097159,organic cyclic compound binding; GO:190136…	PF03514.14:GRAS domain family	GRAS	TF	GRAS
MS.gene00314	14.2	23.34	8.15	2.99	4.27	5.5	28.68	9.61	35.32	9.75	28.35	320.77	47	86	33	11	15	20	97	35	122	33	106	991	chr2.1	56398109	56401642	+	--	--	--	--	XP_013463256.1	--	--	--	PF16888.5:Domain of unknown function (DUF5082)	--	--	--
MS.gene003319	1.19	2.63	3.36	0.19	0.31	0	6.25	4.43	1.76	3.81	0.1	0	11	27	38	2	3	0	59	45	17	36	1	0	chr2.4	59259599	59261558	-	--	--	--	--	XP_003594548.2	--	At5g61820	--	PF07712.12:Stress up-regulated Nod 19	--	--	--
MS.gene00336	5.65	2.65	3.21	2.65	22.32	10.5	5.77	27.12	19.78	9.49	8.48	0	46	24	32	24	193	94	48	243	168	79	78	0	chr2.1	56062107	56064208	-	--	--	K05658 ATP-binding cassette, subfamily B (MDR/TAP), member 1 [EC:7.6.2.2] | (RefSeq) uncharacterized protein LOC111781709 (A)	ko02010: ABC transporters	XP_013463298.1	SRG1_ARATH RecName: Full=Protein SRG1; Short=AtSRG1; AltName: Full=Protein SENESCENCE-RELATED GENE 1;	At3g21420	GO:0046872,metal ion binding; GO:0016682,oxidoreductase activity, acting on diphenols and related substances as donors, oxygen as acceptor; GO:0010150,leaf senescence; GO:0003674,molecular_function; GO:0005488,binding; GO:0043167,ion binding; GO:0043169,cation binding; GO:0003824,catalytic activity; GO:0016491,oxidoreductase activity; GO:0016679,oxidoreductase activity, acting on diphenols and re…	PF14226.6:non-haem dioxygenase in morphine synthesis N-terminal	--	--	--
MS.gene003369	2.96	7.5	17.62	0.36	0	0	1.19	5.87	12.39	1.32	0.72	3.61	22	62	160	3	0	0	9	48	96	10	6	25	chr4.1	28022530	28023629	-	--	--	K25108 licheninase [EC:3.2.1.73] | (RefSeq) glucan endo-1,3-beta-glucosidase (A)	--	XP_013456593.1	E13B_VITVI RecName: Full=Glucan endo-1,3-beta-glucosidase {ECO:0000250|UniProtKB:Q03467}; EC=3.2.1.39; AltName: Full=(1->3)-beta-glucan endohydrolase {ECO:0000250|UniProtKB:Q03467}; Short=(1->3)-beta-glucanase {ECO:0000250|UniProtKB:Q03467}; AltName: Full=Beta-1,3-endoglucanase {ECO:0000250|UniProtKB:Q03467}; Flags: Precursor;	At3g57270	GO:0046658,anchored component of plasma membrane; GO:0042973,glucan endo-1,3-beta-D-glucosidase activity; GO:0005975,carbohydrate metabolic process; GO:0006952,defense response; GO:0009607,response to biotic stimulus; GO:0003674,molecular_function; GO:0003824,catalytic activity; GO:0004553,hydrolase activity, hydrolyzing O-glycosyl compounds; GO:0008422,beta-glucosidase activity; GO:0015926,gluco…	PF00332.18:Glycosyl hydrolases family 17	--	--	--
MS.gene003381	0.69	0.83	1.88	7.39	1.14	2.12	22.22	3.46	8.34	14.98	7.01	13.9	21	28	70	250	37	71	691	116	265	466	241	395	chr4.1	28219471	28224602	+	--	--	K20283 golgin subfamily A member 4 | (RefSeq) myosin-9-like (A)	--	XP_003607292.1	--	At1g05320	GO:0016021,integral component of membrane; GO:0005575,cellular_component; GO:0016020,membrane; GO:0031224,intrinsic component of membrane; GO:0044425,membrane part	PF08614.11:Autophagy protein 16 (ATG16)	--	--	--
MS.gene003384	15.59	20.16	14.71	41.15	18.23	19.01	52.14	135.57	150.88	335.2	176.24	438.48	91	131	105	267	113	122	311	871	919	2000	1162	2389	chr4.1	28262254	28264552	-	--	--	K20628 expansin | (RefSeq) expansin-B3-like (A)	--	ACJ84296.1	EXLA2_ARATH RecName: Full=Expansin-like A2; Short=At-EXPL2; Short=AtEXLA2; Short=AtEXPL2; AltName: Full=Ath-ExpBeta-2.2; Flags: Precursor;	At4g38400	GO:0005576,extracellular region; GO:0009505,plant-type cell wall; GO:0009506,plasmodesma; GO:0019953,sexual reproduction; GO:0000003,reproduction; GO:0008150,biological_process; GO:0022414,reproductive process; GO:0044703,multi-organism reproductive process; GO:0051704,multi-organism process; GO:0005575,cellular_component; GO:0005618,cell wall; GO:0005623,cell; GO:0030312,external encapsulating s…	PF01357.21:Pollen allergen	--	--	--
MS.gene003387	0	0	0	0.71	0.42	1.36	0	5.61	2.45	15.62	9.53	3.4	0	0	0	9	5	17	0	70	29	181	122	36	chr4.1	28295008	28299261	+	--	--	K24917 amino acid permease | (RefSeq) Amino acid permease 2 (A)	--	XP_013456585.1	LHTL8_ARATH RecName: Full=Lysine histidine transporter-like 8; AltName: Full=Amino acid transporter-like protein 1;	At1g47670	GO:0016021,integral component of membrane; GO:0005886,plasma membrane; GO:0006865,amino acid transport; GO:0006810,transport; GO:0006811,ion transport; GO:0006820,anion transport; GO:0008150,biological_process; GO:0015711,organic anion transport; GO:0015849,organic acid transport; GO:0046942,carboxylic acid transport; GO:0051179,localization; GO:0051234,establishment of localization; GO:0071702,o…	PF01490.18:Transmembrane amino acid transporter protein	--	--	--
MS.gene003405	1.04	11.48	4.8	0.93	1.3	2.04	1.01	0.63	0.83	0	0	0.55	6	74	34	6	8	13	6	4	5	0	0	3	chr4.1	28483152	28486459	+	--	--	K13249 translocon-associated protein subunit alpha | (GenBank) translocon-associated protein alpha subunit (A)	ko04141: Protein processing in endoplasmic reticulum	XP_003607276.1	SSRA_ARATH RecName: Full=Translocon-associated protein subunit alpha; Short=TRAP-alpha; AltName: Full=Signal sequence receptor subunit alpha; Short=SSR-alpha; Flags: Precursor;	At2g21160	GO:0009535,chloroplast thylakoid membrane; GO:0005783,endoplasmic reticulum; GO:0005789,endoplasmic reticulum membrane; GO:0005794,Golgi apparatus; GO:0016021,integral component of membrane; GO:0005739,mitochondrion; GO:0005886,plasma membrane; GO:0005774,vacuolar membrane; GO:0005773,vacuole; GO:0005622,intracellular; GO:0005575,cellular_component; GO:0016020,membrane; GO:0005623,cell; GO:000573…	PF03896.16:Translocon-associated protein (TRAP), alpha subunit	--	--	--
MS.gene003425	1053.73	978.08	997.19	884.45	525.62	462.34	596.53	351.88	243.88	202.63	186.86	190.21	1602	1656	1855	1495	849	773	927	589	387	315	321	270	chr4.1	28916317	28916730	-	--	--	--	--	XP_022132798.1	NDUB2_ARATH RecName: Full=NADH dehydrogenase [ubiquinone] 1 beta subcomplex subunit 2;	At1g76200	GO:0005747,mitochondrial respiratory chain complex I; GO:0005622,intracellular; GO:0005575,cellular_component; GO:0016020,membrane; GO:0005739,mitochondrion; GO:0005623,cell; GO:0005737,cytoplasm; GO:0005740,mitochondrial envelope; GO:0005743,mitochondrial inner membrane; GO:0005746,mitochondrial respiratory chain; GO:0043231,intracellular membrane-bounded organelle; GO:0019866,organelle inner me…	PF14813.6:NADH dehydrogenase 1 beta subcomplex subunit 2	--	--	--
MS.gene003565	6.26	6.75	5	8.76	32.02	19.86	9.87	13.08	14.33	29.25	18.65	13.04	90	108	88	140	489	314	145	207	215	430	303	175	chr4.1	30526697	30530237	+	--	--	K13430 serine/threonine-protein kinase PBS1 [EC:2.7.11.1] | (RefSeq) serine/threonine-protein kinase PBS1-like (A)	ko04626: Plant-pathogen interaction	XP_003607181.2	PEK11_ARATH RecName: Full=Putative proline-rich receptor-like protein kinase PERK11; EC=2.7.11.1; AltName: Full=Proline-rich extensin-like receptor kinase 11; Short=AtPERK11;	At5g63940	GO:0016021,integral component of membrane; GO:0005886,plasma membrane; GO:0005524,ATP binding; GO:0106310,NA; GO:0106311,NA; GO:0000166,nucleotide binding; GO:0003674,molecular_function; GO:0005488,binding; GO:0008144,drug binding; GO:0017076,purine nucleotide binding; GO:0030554,adenyl nucleotide binding; GO:0032553,ribonucleotide binding; GO:0032555,purine ribonucleotide binding; GO:0032559,ade…	PF00069.25:Protein kinase domain	--	--	--
MS.gene003570	0	0.51	0.7	0	1.34	0.52	2.79	10.61	8.46	9.75	4.29	3.66	0	2	3	0	5	2	10	41	31	35	17	12	chr4.1	30549026	30549925	-	--	--	K10752 histone-binding protein RBBP4 | (RefSeq) LOW QUALITY PROTEIN: WD-40 repeat-containing protein MSI3 (A)	--	XP_003607174.1	HIP26_ARATH RecName: Full=Heavy metal-associated isoprenylated plant protein 26 {ECO:0000303|PubMed:21072340, ECO:0000303|PubMed:23368984}; Short=AtHIP26 {ECO:0000303|PubMed:23368984}; Short=AtHIPP26 {ECO:0000303|PubMed:21072340, ECO:0000303|PubMed:23368984}; AltName: Full=Farnesylated protein 6 {ECO:0000303|PubMed:8837031}; Short=AtFP6 {ECO:0000303|PubMed:8837031}; Flags: Precursor;	At4g38580	GO:0031965,nuclear membrane; GO:0005886,plasma membrane; GO:0009506,plasmodesma; GO:0046870,cadmium ion binding; GO:0005507,copper ion binding; GO:0032791,lead ion binding; GO:0010286,heat acclimation; GO:0003674,molecular_function; GO:0005488,binding; GO:0046872,metal ion binding; GO:0043167,ion binding; GO:0043169,cation binding; GO:0046914,transition metal ion binding; GO:0006950,response to s…	PF00403.26:Heavy-metal-associated domain	--	--	--
MS.gene003571	0.75	0.17	0.93	3.23	9.77	5.66	1.11	3.77	2.53	14.4	0.33	0	4	1	6	19	55	33	6	22	14	78	2	0	chr4.1	30559178	30563654	+	--	--	K00999 CDP-diacylglycerol--inositol 3-phosphatidyltransferase [EC:2.7.8.11] | (GenBank) CDP-diacylglycerol-inositol 3-phosphatidyltransferase (A)	ko00562: Inositol phosphate metabolism; ko00564: Glycerophospholipid metabolism; ko01100: Metabolic pathways; ko04070: Phosphatidylinositol signaling system	XP_003607172.1	PIS1_ARATH RecName: Full=CDP-diacylglycerol--inositol 3-phosphatidyltransferase 1; EC=2.7.8.11; AltName: Full=Phosphatidylinositol synthase 1; Short=AtPIS1; Short=PI synthase 1; Short=PtdIns synthase 1;	At1g68000	GO:0005783,endoplasmic reticulum; GO:0005794,Golgi apparatus; GO:0016021,integral component of membrane; GO:0016020,membrane; GO:0003881,CDP-diacylglycerol-inositol 3-phosphatidyltransferase activity; GO:0046872,metal ion binding; GO:0006661,phosphatidylinositol biosynthetic process; GO:0008654,phospholipid biosynthetic process; GO:0003674,molecular_function; GO:0003824,catalytic activity; GO:001…	PF01066.21:CDP-alcohol phosphatidyltransferase	--	--	--
MS.gene003573	0.21	0.31	0.03	0.42	0.28	0.51	2.05	3.77	7.63	4.77	4.96	0	5	8	1	11	7	13	49	97	186	114	131	0	chr4.1	30571582	30581795	+	--	--	--	--	XP_013456450.1	PP349_ARATH RecName: Full=Pentatricopeptide repeat-containing protein MRL1, chloroplastic; AltName: Full=Protein MATURATION OF RBCL 1; Short=AtMRL1; Flags: Precursor;	At4g34820	GO:0009507,chloroplast; GO:0048255,mRNA stabilization; GO:0008152,metabolic process; GO:0006139,nucleobase-containing compound metabolic process; GO:0006401,RNA catabolic process; GO:0006402,mRNA catabolic process; GO:0006725,cellular aromatic compound metabolic process; GO:0006807,nitrogen compound metabolic process; GO:0008150,biological_process; GO:0009056,catabolic process; GO:0009057,macromo…	PF13041.6:PPR repeat family	--	--	--
MS.gene003620	6.71	10.85	5.56	47.85	34.04	14.12	4.76	19.74	19.46	30.45	12.63	24.09	80	144	81	634	431	185	58	259	242	371	170	268	chr4.1	31024997	31028697	+	--	--	K19525 vacuolar protein sorting-associated protein 13A/C | (RefSeq) uncharacterized protein LOC110098611 (A)	--	XP_021827285.1	--	At1g35647	GO:0003676,nucleic acid binding; GO:0008270,zinc ion binding; GO:0015074,DNA integration; GO:0003674,molecular_function; GO:0005488,binding; GO:0097159,organic cyclic compound binding; GO:1901363,heterocyclic compound binding; GO:0046872,metal ion binding; GO:0043167,ion binding; GO:0043169,cation binding; GO:0046914,transition metal ion binding; GO:0008152,metabolic process; GO:0006139,nucleobas…	PF17919.1:RNase H-like domain found in reverse transcriptase	--	--	--
MS.gene003621	231.95	88.47	95.46	630.89	774.29	388.86	144.14	248.82	433.73	379.65	413.5	413.5	1535	652	773	4642	5444	2830	975	1813	2996	2569	3092	2555	chr4.1	31050626	31052322	-	--	--	K22374 3''-deamino-3''-oxonicotianamine reductase [EC:1.1.1.285] | (GenBank) aldo/keto reductase family oxidoreductase (A)	--	XP_003607108.1	MER_ERYCB RecName: Full=Methylecgonone reductase; Short=MecgoR; EC=1.1.1.334;	At1g59950	GO:0047834,D-threo-aldose 1-dehydrogenase activity; GO:1901869,ecgonine methyl ester biosynthetic process; GO:1901868,ecgonine methyl ester catabolic process; GO:1901872,ecgonone methyl ester biosynthetic process; GO:1901871,ecgonone methyl ester catabolic process; GO:0003674,molecular_function; GO:0003824,catalytic activity; GO:0016491,oxidoreductase activity; GO:0016614,oxidoreductase activity,…	PF00248.21:Aldo/keto reductase family	--	--	--
MS.gene003711	0.41	0.74	1.69	1.49	43.66	14.69	20.66	189.58	203.15	129.61	0.37	1.33	1	2	5	4	112	39	51	504	512	320	1	3	chr4.1	32271741	32274170	+	--	--	K02975 small subunit ribosomal protein S25e | (GenBank) ribosomal protein S25 (A)	ko03010: Ribosome	XP_013456419.1	RS252_ARATH RecName: Full=40S ribosomal protein S25-2;	At2g21580	GO:0022626,cytosolic ribosome; GO:0022627,cytosolic small ribosomal subunit; GO:0009506,plasmodesma; GO:0042788,polysomal ribosome; GO:0005774,vacuolar membrane; GO:0005773,vacuole; GO:0003729,mRNA binding; GO:0003735,structural constituent of ribosome; GO:0003674,molecular_function; GO:0003676,nucleic acid binding; GO:0003723,RNA binding; GO:0005488,binding; GO:0097159,organic cyclic compound bi…	PF03297.15:S25 ribosomal protein	--	--	--
MS.gene003742	36.02	65.23	47.84	1.35	3.67	0.27	44.64	29.99	22.72	27.89	34.01	64.62	120	242	195	5	13	1	152	110	79	95	128	201	chr4.1	32631103	32631549	-	--	--	K11252 histone H2B | (GenBank) core histone H2A/H2B/H3/H4 (A)	--	XP_003606627.1	H2B_GOSHI RecName: Full=Histone H2B;	At3g46030	GO:0000786,nucleosome; GO:0005634,nucleus; GO:0003677,DNA binding; GO:0046982,protein heterodimerization activity; GO:0006334,nucleosome assembly; GO:0003674,molecular_function; GO:0003676,nucleic acid binding; GO:0005488,binding; GO:0097159,organic cyclic compound binding; GO:1901363,heterocyclic compound binding; GO:0005515,protein binding; GO:0046983,protein dimerization activity; GO:0051276,c…	PF00125.24:Core histone H2A/H2B/H3/H4	--	--	--
MS.gene003746	64.5	56.02	80.61	31.55	48.75	19.05	26.72	7.91	24.36	21.18	2.92	1.26	274	265	419	149	220	89	116	37	108	92	14	5	chr4.1	32702575	32703396	-	--	--	K13195 cold-inducible RNA-binding protein | (GenBank) RNA-binding (RRM/RBD/RNP motif) family protein (A)	--	XP_003606916.1	GRP1_SINAL RecName: Full=Glycine-rich RNA-binding protein GRP1A;	At2g21660	GO:0005634,nucleus; GO:0003723,RNA binding; GO:0003674,molecular_function; GO:0003676,nucleic acid binding; GO:0005488,binding; GO:0097159,organic cyclic compound binding; GO:1901363,heterocyclic compound binding; GO:0005622,intracellular; GO:0005575,cellular_component; GO:0005623,cell; GO:0043231,intracellular membrane-bounded organelle; GO:0043226,organelle; GO:0043227,membrane-bounded organell…	PF00076.22:RNA recognition motif. (a.k.a. RRM, RBD, or RNP domain)	--	--	--
MS.gene003758	0.18	0.98	0.67	3.03	0.43	1.08	3.12	3.81	5.06	1.78	0.89	0	2	12	9	37	5	13	35	46	58	20	11	0	chr4.2	36918847	36922347	-	--	--	--	--	XP_003606902.1	Y1385_ARATH RecName: Full=BTB/POZ domain-containing protein At1g63850;	At1g63850	GO:0016567,protein ubiquitination; GO:0008152,metabolic process; GO:0006464,cellular protein modification process; GO:0006807,nitrogen compound metabolic process; GO:0008150,biological_process; GO:0009987,cellular process; GO:0019538,protein metabolic process; GO:0032446,protein modification by small protein conjugation; GO:0036211,protein modification process; GO:0043170,macromolecule metabolic …	--	--	--	--
MS.gene003768	1279.42	1291.22	597.72	339.71	357.25	740.5	505.65	325.73	321	111.45	48.69	256.36	11070	12442	6328	3268	3284	7046	4472	3103	2899	986	476	2071	chr4.1	32848581	32849741	-	--	--	--	--	XP_003606883.2	--	--	--	PF10950.8:Organ specific protein	--	--	--
MS.gene003771	10.23	14.82	6.2	0.15	0.16	1.05	2.1	10.49	16.76	3.87	0.88	37.3	62	100	46	1	1	7	13	70	106	24	6	211	chr4.1	32894890	32899410	+	--	--	K01358 ATP-dependent Clp protease, protease subunit [EC:3.4.21.92] | (GenBank) ATP-dependent Clp protease proteolytic protein (A)	--	XP_003606880.1	CLPP6_ARATH RecName: Full=ATP-dependent Clp protease proteolytic subunit 6, chloroplastic {ECO:0000303|PubMed:11299370}; EC=3.4.21.92; AltName: Full=Endopeptidase ClpP6 {ECO:0000303|PubMed:11299370}; Short=nClpP6; AltName: Full=nClpP1; Flags: Precursor;	At1g11750	GO:0009570,chloroplast stroma; GO:0009368,endopeptidase Clp complex; GO:0004176,ATP-dependent peptidase activity; GO:0051117,ATPase binding; GO:0004252,serine-type endopeptidase activity; GO:0006515,protein quality control for misfolded or incompletely synthesized proteins; GO:0003674,molecular_function; GO:0042623,ATPase activity, coupled; GO:0003824,catalytic activity; GO:0017111,nucleoside-tri…	PF00574.23:Clp protease	--	--	--
MS.gene003774	2.43	4.56	1.35	0.39	0.27	0.46	0.49	0.45	2.33	1.47	1.14	15.33	34	71	23	6	4	7	7	7	34	21	18	200	chr4.1	32967746	32970812	+	--	--	K06699 proteasome activator subunit 4 | (RefSeq) hypothetical protein (A)	ko03050: Proteasome	PNX84074.1	BNM2A_BRANA RecName: Full=BURP domain-containing protein BNM2A {ECO:0000303|PubMed:19714473}; AltName: Full=Brassica napus microspore-derived embryo protein 2 {ECO:0000303|PubMed:9790599}; Short=BNM2 {ECO:0000303|PubMed:9790599}; Flags: Precursor;	At1g49320	GO:0000326,protein storage vacuole; GO:0005622,intracellular; GO:0005575,cellular_component; GO:0000322,storage vacuole; GO:0000325,plant-type vacuole; GO:0005773,vacuole; GO:0005623,cell; GO:0005737,cytoplasm; GO:0043231,intracellular membrane-bounded organelle; GO:0043226,organelle; GO:0043227,membrane-bounded organelle; GO:0043229,intracellular organelle; GO:0044424,intracellular part; GO:0044…	PF03181.15:BURP domain	--	--	--
MS.gene003775	14.03	12.13	11.95	4	3.78	3.66	8.03	2.25	5	0.92	5.07	2.93	164	158	171	52	47	47	96	29	61	11	67	32	chr4.1	32977958	32980252	-	--	--	K08150 MFS transporter, SP family, solute carrier family 2 (myo-inositol transporter), member 13 | (RefSeq) inositol transporter 1 (A)	--	XP_013456395.1	PLT5_ARATH RecName: Full=Polyol transporter 5; AltName: Full=Protein POLYOL TRANSPORTER 5; Short=AtPLT5; AltName: Full=Sugar-proton symporter PLT5;	At3g18830	GO:0016021,integral component of membrane; GO:0005886,plasma membrane; GO:0005351,carbohydrate:proton symporter activity; GO:0015591,D-ribose transmembrane transporter activity; GO:0015148,D-xylose transmembrane transporter activity; GO:0005354,galactose transmembrane transporter activity; GO:0005355,glucose transmembrane transporter activity; GO:0015168,glycerol transmembrane transporter activit…	PF00083.24:Sugar (and other) transporter	--	--	--
MS.gene003781	9.88	8.65	4.97	0.46	0.95	1.84	2.85	4.26	9.23	0.87	0.45	0	78	76	48	4	8	16	23	37	76	7	4	0	chr4.1	33113357	33114415	+	--	--	K20783 arabinosyltransferase [EC:2.4.2.-] | (GenBank) nucleotide-diphospho-sugar transferase family protein (A)	ko00514: Other types of O-glycan biosynthesis	XP_013456385.1	RRA3_ARATH RecName: Full=Arabinosyltransferase RRA3 {ECO:0000305}; EC=2.4.2.- {ECO:0000305}; AltName: Full=Protein REDUCED RESIDUAL ARABINOSE 3 {ECO:0000303|PubMed:21680836};	At1g19360	GO:0005768,endosome; GO:0005794,Golgi apparatus; GO:0005797,Golgi medial cisterna; GO:0000139,Golgi membrane; GO:0016021,integral component of membrane; GO:0005802,trans-Golgi network; GO:0016757,transferase activity, transferring glycosyl groups; GO:0071555,cell wall organization; GO:0080147,root hair cell development; GO:0003674,molecular_function; GO:0003824,catalytic activity; GO:0016740,tran…	PF03407.16:Nucleotide-diphospho-sugar transferase	--	--	--
MS.gene003815	76.4	73.84	55.17	325.83	153.49	226.6	473.19	1474.84	417.07	2351.26	1844	779.57	275	296	243	1304	587	897	1741	5845	1567	8654	7500	2620	chr4.2	37801995	37803178	+	--	--	K11968 ariadne-1 [EC:2.3.2.31] | (RefSeq) probable E3 ubiquitin-protein ligase ARI2 isoform X1 (A)	--	Q9FVL0.1	HBL1_MEDSA RecName: Full=Non-symbiotic hemoglobin 1; AltName: Full=MEDsa GLB1;	At2g16060	GO:0005737,cytoplasm; GO:0016363,nuclear matrix; GO:0020037,heme binding; GO:0046872,metal ion binding; GO:0019825,oxygen binding; GO:0003674,molecular_function; GO:0005488,binding; GO:0046906,tetrapyrrole binding; GO:0048037,cofactor binding; GO:0097159,organic cyclic compound binding; GO:1901363,heterocyclic compound binding; GO:0043167,ion binding; GO:0043169,cation binding; GO:0008144,drug bi…	PF00042.22:Globin	--	--	--
MS.gene003831	152.07	92.01	95.71	174.81	75.78	106.49	46.94	32.5	32.72	24.66	33.11	189.01	187	126	144	239	99	144	59	44	42	31	46	217	chr4.2	38035645	38035809	+	--	--	--	--	XP_013456331.1	TOM6_ARATH RecName: Full=Mitochondrial import receptor subunit TOM6 homolog; AltName: Full=Translocase of outer membrane 6 kDa subunit homolog;	At1g49410	GO:0016021,integral component of membrane; GO:0005742,mitochondrial outer membrane translocase complex; GO:0005739,mitochondrion; GO:0015031,protein transport; GO:0008104,protein localization; GO:0006810,transport; GO:0008150,biological_process; GO:0015833,peptide transport; GO:0033036,macromolecule localization; GO:0042886,amide transport; GO:0045184,establishment of protein localization; GO:005…	PF10642.9:Mitochondrial import receptor subunit or translocase	--	--	--
MS.gene003838	0.35	2.85	0.58	2.38	0.75	1.76	5.69	11.04	9.79	8.01	2.49	1.79	4	36	8	30	9	22	66	138	116	93	32	19	chr4.2	38128103	38129626	+	--	--	--	--	XP_013456325.1	JGB_ARATH RecName: Full=Protein JINGUBANG {ECO:0000303|PubMed:27468890};	At2g26490	GO:0005737,cytoplasm; GO:0005634,nucleus; GO:0009846,pollen germination; GO:0000003,reproduction; GO:0008150,biological_process; GO:0009856,pollination; GO:0022414,reproductive process; GO:0032501,multicellular organismal process; GO:0044706,multi-multicellular organism process; GO:0051704,multi-organism process; GO:0005622,intracellular; GO:0005575,cellular_component; GO:0005623,cell; GO:0044424…	PF00400.32:WD domain, G-beta repeat	--	--	--
MS.gene003839	0.59	0	0.48	0.53	0	0	7.49	16.04	33.83	16.69	5.73	18.28	1	0	1	1	0	0	13	30	60	29	11	29	chr4.2	38141428	38141655	-	--	--	--	--	XP_003606861.1	--	At2g15960	--	--	--	--	--
MS.gene003897	1.37	1.99	1.95	27.18	6.75	26.47	11.11	6.05	8.83	2.59	5.36	0	16	26	28	354	84	341	133	78	108	31	71	0	chr4.4	39508567	39510834	-	--	--	K01188 beta-glucosidase [EC:3.2.1.21] | (GenBank) glycoside hydrolase family 1 protein (A)	ko00460: Cyanoamino acid metabolism; ko00500: Starch and sucrose metabolism; ko00940: Phenylpropanoid biosynthesis; ko01100: Metabolic pathways; ko01110: Biosynthesis of secondary metabolites	XP_013456264.1	BGL12_ORYSI RecName: Full=Beta-glucosidase 12 {ECO:0000305}; EC=3.2.1.21 {ECO:0000305}; Flags: Precursor;	At2g44450	GO:0005576,extracellular region; GO:0008422,beta-glucosidase activity; GO:0102483,scopolin beta-glucosidase activity; GO:0005975,carbohydrate metabolic process; GO:0003674,molecular_function; GO:0003824,catalytic activity; GO:0004553,hydrolase activity, hydrolyzing O-glycosyl compounds; GO:0015926,glucosidase activity; GO:0016787,hydrolase activity; GO:0016798,hydrolase activity, acting on glycos…	PF00232.18:Glycosyl hydrolase family 1	--	--	--
MS.gene003900	60.53	64.67	32.43	29.75	58.65	51.87	19.45	14.08	11.87	6.53	22.58	18.75	816	971	535	446	840	769	268	209	167	90	344	236	chr4.4	39545330	39552659	+	--	--	K01188 beta-glucosidase [EC:3.2.1.21] | (GenBank) glycoside hydrolase family 1 protein (A)	ko00460: Cyanoamino acid metabolism; ko00500: Starch and sucrose metabolism; ko00940: Phenylpropanoid biosynthesis; ko01100: Metabolic pathways; ko01110: Biosynthesis of secondary metabolites	XP_013456270.1	BGLS_TRIRP RecName: Full=Non-cyanogenic beta-glucosidase; EC=3.2.1.21; Flags: Precursor;	At5g44640	GO:0008422,beta-glucosidase activity; GO:0102483,scopolin beta-glucosidase activity; GO:0005975,carbohydrate metabolic process; GO:0003674,molecular_function; GO:0003824,catalytic activity; GO:0004553,hydrolase activity, hydrolyzing O-glycosyl compounds; GO:0015926,glucosidase activity; GO:0016787,hydrolase activity; GO:0016798,hydrolase activity, acting on glycosyl bonds; GO:0008152,metabolic pr…	PF00232.18:Glycosyl hydrolase family 1	--	--	--
MS.gene003901	5.17	9.82	5.36	0.98	0.19	2.35	1.36	0.9	0.1	1.36	1.5	0.21	52	110	66	11	2	26	14	10	1	14	17	2	chr4.4	39553891	39555386	+	--	--	K01762 1-aminocyclopropane-1-carboxylate synthase [EC:4.4.1.14] | (RefSeq) 1-aminocyclopropane-1-carboxylate synthase 7-like (A)	ko00270: Cysteine and methionine metabolism; ko01100: Metabolic pathways; ko01110: Biosynthesis of secondary metabolites	XP_003543854.2	--	At3g17450	GO:0016021,integral component of membrane; GO:0046983,protein dimerization activity; GO:0005515,protein binding; GO:0003674,molecular_function; GO:0005488,binding; GO:0005575,cellular_component; GO:0016020,membrane; GO:0031224,intrinsic component of membrane; GO:0044425,membrane part	PF04937.15:Protein of unknown function (DUF 659)	--	--	--
MS.gene003903	0.43	1.92	1.05	2.15	5.72	5.99	4.77	3.03	16.96	2.76	3.86	0	5	25	15	28	71	77	57	39	207	33	51	0	chr4.4	39598890	39601095	+	--	--	K01188 beta-glucosidase [EC:3.2.1.21] | (GenBank) glycoside hydrolase family 1 protein (A)	ko00460: Cyanoamino acid metabolism; ko00500: Starch and sucrose metabolism; ko00940: Phenylpropanoid biosynthesis; ko01100: Metabolic pathways; ko01110: Biosynthesis of secondary metabolites	ABW76287.1	BGL12_ORYSI RecName: Full=Beta-glucosidase 12 {ECO:0000305}; EC=3.2.1.21 {ECO:0000305}; Flags: Precursor;	At2g44450	GO:0005576,extracellular region; GO:0008422,beta-glucosidase activity; GO:0102483,scopolin beta-glucosidase activity; GO:0005975,carbohydrate metabolic process; GO:0003674,molecular_function; GO:0003824,catalytic activity; GO:0004553,hydrolase activity, hydrolyzing O-glycosyl compounds; GO:0015926,glucosidase activity; GO:0016787,hydrolase activity; GO:0016798,hydrolase activity, acting on glycos…	PF00232.18:Glycosyl hydrolase family 1	--	--	--
MS.gene003955	2.09	5.07	5.64	13.16	11.61	7.98	17.38	12.72	18.02	32.09	16.46	21.71	10	27	33	70	59	42	85	67	90	157	89	97	chr4.1	35505465	35508024	+	--	--	K19045 E3 ubiquitin-protein ligase BIG BROTHER and related proteins [EC:2.3.2.27] | (GenBank) E3 ubiquitin ligase BIG brother-like protein (A)	--	XP_003606782.2	BB_ARATH RecName: Full=E3 ubiquitin-protein ligase BIG BROTHER; EC=2.3.2.27 {ECO:0000269|PubMed:16461280, ECO:0000269|PubMed:18483219}; AltName: Full=Protein ENHANCER OF DA1-1; AltName: Full=RING-type E3 ubiquitin transferase BIG BROTHER {ECO:0000305};	At3g19910	GO:0046872,metal ion binding; GO:0031624,ubiquitin conjugating enzyme binding; GO:0004842,ubiquitin-protein transferase activity; GO:0048437,floral organ development; GO:0008285,negative regulation of cell proliferation; GO:0046621,negative regulation of organ growth; GO:1900057,positive regulation of leaf senescence; GO:0051865,protein autoubiquitination; GO:0016567,protein ubiquitination; GO:00…	--	--	--	--
MS.gene003986	24.67	11.2	14.84	0	0	0	27.32	5.42	7.27	3.71	3.12	0	91	46	67	0	0	0	103	22	28	14	13	0	chr4.3	39177056	39178632	+	--	--	K00847 fructokinase [EC:2.7.1.4] | (RefSeq) probable fructokinase-1 isoform X1 (A)	ko00051: Fructose and mannose metabolism; ko00500: Starch and sucrose metabolism; ko00520: Amino sugar and nucleotide sugar metabolism; ko01100: Metabolic pathways; ko01110: Biosynthesis of secondary metabolites	XP_013456166.1	PHO32_ARATH RecName: Full=Universal stress protein PHOS32 {ECO:0000303|PubMed:12644671}; AltName: Full=Phosphorylated protein of 32 kDa {ECO:0000303|PubMed:18285339}; Short=AtPHOS32 {ECO:0000303|PubMed:18285339}; Flags: Precursor;	At3g53990	GO:0009507,chloroplast; GO:0005829,cytosol; GO:0005634,nucleus; GO:0005886,plasma membrane; GO:0009536,plastid; GO:0005524,ATP binding; GO:0002238,response to molecule of fungal origin; GO:0000166,nucleotide binding; GO:0003674,molecular_function; GO:0005488,binding; GO:0008144,drug binding; GO:0017076,purine nucleotide binding; GO:0030554,adenyl nucleotide binding; GO:0032553,ribonucleotide bind…	PF00582.26:Universal stress protein family	--	--	--
MS.gene00399	0.31	0.28	0.89	14.34	8.01	0.14	0	0.28	0.89	1.36	18.49	0	2	2	7	103	55	1	0	2	6	9	135	0	chr2.2	50965732	50969203	-	--	--	K15631 molybdenum cofactor sulfurtransferase [EC:2.8.1.9] | (RefSeq) molybdenum cofactor sulfurase isoform X1 (A)	ko00790: Folate biosynthesis	XP_003594859.2	MOCOS_ORYSJ RecName: Full=Molybdenum cofactor sulfurase {ECO:0000255|HAMAP-Rule:MF_03050}; Short=MCS {ECO:0000255|HAMAP-Rule:MF_03050}; Short=MOS {ECO:0000255|HAMAP-Rule:MF_03050}; Short=MoCo sulfurase {ECO:0000255|HAMAP-Rule:MF_03050}; EC=2.8.1.9 {ECO:0000255|HAMAP-Rule:MF_03050}; AltName: Full=Molybdenum cofactor sulfurase-like protein 3 {ECO:0000255|HAMAP-Rule:MF_03050}; AltName: Full=Molybden…	At1g30910	GO:0016829,lyase activity; GO:0008265,Mo-molybdopterin cofactor sulfurase activity; GO:0102867,molybdenum cofactor sulfurtransferase activity; GO:0030151,molybdenum ion binding; GO:0030170,pyridoxal phosphate binding; GO:0006777,Mo-molybdopterin cofactor biosynthetic process; GO:0003674,molecular_function; GO:0003824,catalytic activity; GO:0016783,sulfurtransferase activity; GO:0016740,transferas…	PF03473.17:MOSC domain	--	--	--
MS.gene003992	0.33	0.45	0.95	4.2	8.17	3.49	8.33	2.58	4.32	6.69	11.37	17.87	2	3	7	28	52	23	51	17	27	41	77	100	chr4.3	39197864	39199746	-	--	--	K08081 tropinone reductase I [EC:1.1.1.206] | (GenBank) NAD(P)-binding rossmann-fold protein (A)	ko00960: Tropane, piperidine and pyridine alkaloid biosynthesis; ko01100: Metabolic pathways; ko01110: Biosynthesis of secondary metabolites	XP_013456159.1	TRNH4_ARATH RecName: Full=Tropinone reductase homolog At2g29170 {ECO:0000305}; EC=1.1.1.- {ECO:0000305};	At2g29170	GO:0016491,oxidoreductase activity; GO:0003674,molecular_function; GO:0003824,catalytic activity	PF13561.6:Enoyl-(Acyl carrier protein) reductase	--	--	--
MS.gene00403	0.53	1.26	2.3	1.43	0.33	1.44	1.9	24.31	16.7	15.5	10.29	0.19	3	8	16	9	2	9	11	152	99	90	66	1	chr2.2	50947963	50949607	+	--	--	--	--	XP_003594856.1	--	At5g44730	GO:0016787,hydrolase activity; GO:0003674,molecular_function; GO:0003824,catalytic activity	PF00702.26:haloacid dehalogenase-like hydrolase	--	--	--
MS.gene004054	4.4	5.13	6.69	5.63	9.07	9.57	21.54	28.19	21.49	9.62	4.26	8.77	64	83	119	91	140	153	320	451	326	143	70	119	chr4.2	41656608	41659355	+	--	--	K03283 heat shock 70kDa protein 1/2/6/8 | (GenBank) heat shock cognate 70 kDa protein (A)	ko03040: Spliceosome; ko04141: Protein processing in endoplasmic reticulum; ko04144: Endocytosis	XP_013456102.1	HSP72_SOLLC RecName: Full=Heat shock cognate 70 kDa protein 2;	At3g12580	GO:0005737,cytoplasm; GO:0005524,ATP binding; GO:0016887,ATPase activity; GO:0031072,heat shock protein binding; GO:0051787,misfolded protein binding; GO:0044183,protein binding involved in protein folding; GO:0051082,unfolded protein binding; GO:0034620,cellular response to unfolded protein; GO:0051085,chaperone cofactor-dependent protein refolding; GO:0042026,protein refolding; GO:0000166,nucle…	PF00012.20:Hsp70 protein	--	--	--
MS.gene004088	35	26.83	43.92	213.23	71.39	53.37	225.02	265.42	116.87	12.79	88.87	33.14	198	169	304	1341	429	332	1301	1653	690	74	568	175	chr4.2	42054522	42055966	-	--	--	K09873 aquaporin TIP | (GenBank) tonoplast intrinsic protein (A)	--	XP_003606614.1	TIP11_ARATH RecName: Full=Aquaporin TIP1-1; AltName: Full=Aquaporin TIP; AltName: Full=Gamma-tonoplast intrinsic protein; Short=Gamma-TIP; AltName: Full=Tonoplast intrinsic protein 1-1; Short=AtTIP1;1; AltName: Full=Tonoplast intrinsic protein, root-specific RB7;	At2g36830	GO:0042807,central vacuole; GO:0009941,chloroplast envelope; GO:0016021,integral component of membrane; GO:0009705,plant-type vacuole membrane; GO:0000326,protein storage vacuole; GO:0005774,vacuolar membrane; GO:0005773,vacuole; GO:0015204,urea transmembrane transporter activity; GO:0015250,water channel activity; GO:0080170,hydrogen peroxide transmembrane transport; GO:0015840,urea transport; G…	PF00230.20:Major intrinsic protein	--	--	--
MS.gene004089	218.85	88.21	287.87	28.74	33.08	7.99	33.6	129.85	26.78	169.5	235.39	171.09	274	123	441	40	44	11	43	179	35	217	333	200	chr4.2	42060448	42061180	-	--	--	--	--	XP_003606613.1	ATPY_SOLTU RecName: Full=ATP synthase 6 kDa subunit, mitochondrial; Flags: Fragment;	At3g46430	GO:0005743,mitochondrial inner membrane; GO:0045263,proton-transporting ATP synthase complex, coupling factor F(o); GO:0006811,ion transport; GO:0006810,transport; GO:0008150,biological_process; GO:0051179,localization; GO:0051234,establishment of localization; GO:0005622,intracellular; GO:0005575,cellular_component; GO:0016020,membrane; GO:0005739,mitochondrion; GO:0005623,cell; GO:0005737,cytop…	--	--	--	--
MS.gene004138	158.82	164.14	34.44	1.17	57.96	4.72	0.63	101.27	335.98	1032.08	433.71	852.57	245	282	65	2	95	8	1	172	541	1628	756	1228	chr4.2	42906660	42906866	-	--	--	--	--	PNX98921.1	--	--	--	--	--	--	--
MS.gene004202	0	0	0	0.91	2.22	0.92	1.32	1.53	1.61	23.35	16.96	37.46	0	0	0	3	7	3	4	5	5	71	57	104	chr2.4	69851472	69851870	-	--	--	K13433 pathogenesis-related genes transcriptional activator PTI5 | (GenBank) ethylene response factor (A)	ko04626: Plant-pathogen interaction	XP_003593690.1	PTI5_SOLLC RecName: Full=Pathogenesis-related genes transcriptional activator PTI5; AltName: Full=PTO-interacting protein 5;	At4g17500	GO:0005634,nucleus; GO:0003677,DNA binding; GO:0003700,DNA-binding transcription factor activity; GO:0006952,defense response; GO:0003674,molecular_function; GO:0003676,nucleic acid binding; GO:0005488,binding; GO:0097159,organic cyclic compound binding; GO:1901363,heterocyclic compound binding; GO:0140110,transcription regulator activity; GO:0006950,response to stress; GO:0008150,biological_proc…	PF00847.20:AP2 domain	AP2/ERF-ERF	TF	AP2/ERF->AP2/ERF-ERF
MS.gene004226	0.53	0.89	4.42	1.17	2.94	1.11	11.48	52.39	17.45	18.41	14.36	9.63	7	13	71	17	41	16	154	757	239	247	213	118	chr2.4	69287582	69290978	-	--	--	K01568 pyruvate decarboxylase [EC:4.1.1.1] | (GenBank) pyruvate decarboxylase (A)	ko00010: Glycolysis / Gluconeogenesis; ko01100: Metabolic pathways; ko01110: Biosynthesis of secondary metabolites	XP_003593734.1	PDC1_PEA RecName: Full=Pyruvate decarboxylase 1; Short=PDC; EC=4.1.1.1;	At5g54960	GO:0000287,magnesium ion binding; GO:0004737,pyruvate decarboxylase activity; GO:0030976,thiamine pyrophosphate binding; GO:0003674,molecular_function; GO:0005488,binding; GO:0046872,metal ion binding; GO:0043167,ion binding; GO:0043169,cation binding; GO:0003824,catalytic activity; GO:0016829,lyase activity; GO:0016830,carbon-carbon lyase activity; GO:0016831,carboxy-lyase activity; GO:0019842,v…	PF02776.18:Thiamine pyrophosphate enzyme, N-terminal TPP binding domain	--	--	--
MS.gene004239	0.22	0.19	0	1.27	1.02	1.88	0.64	3.65	1.87	14.86	15.47	27.32	2	2	0	13	10	19	6	37	18	140	161	235	chr2.4	69011884	69014962	+	--	--	K08332 vacuolar protein 8 | (RefSeq) LOW QUALITY PROTEIN: U-box domain-containing protein 3 (A)	--	XP_003593767.1	PUB45_ARATH RecName: Full=U-box domain-containing protein 45; EC=2.3.2.27; AltName: Full=Plant U-box protein 45; AltName: Full=RING-type E3 ubiquitin transferase PUB45 {ECO:0000305};	At2g27430	GO:0005737,cytoplasm; GO:0005634,nucleus; GO:0070696,transmembrane receptor protein serine/threonine kinase binding; GO:0004842,ubiquitin-protein transferase activity; GO:0016567,protein ubiquitination; GO:0005515,protein binding; GO:0003674,molecular_function; GO:0005102,signaling receptor binding; GO:0005488,binding; GO:0033612,receptor serine/threonine kinase binding; GO:0003824,catalytic acti…	PF00514.23:Armadillo/beta-catenin-like repeat	--	--	--
MS.gene004240	0	0	0	4.08	4.27	2.81	0.81	0.75	4.34	0.81	1.82	3.75	0	0	0	22	22	15	4	4	22	4	10	17	chr2.4	68997619	68999835	+	--	--	K22484 transcriptional regulator CBF1 | (RefSeq) transcription factor bHLH106 (A)	--	XP_003593769.1	BH030_ARATH RecName: Full=Transcription factor bHLH30; AltName: Full=Basic helix-loop-helix protein 30; Short=AtbHLH30; Short=bHLH 30; AltName: Full=Transcription factor EN 53; AltName: Full=bHLH transcription factor bHLH030;	At1g68810	GO:0005634,nucleus; GO:0003677,DNA binding; GO:0003700,DNA-binding transcription factor activity; GO:0046983,protein dimerization activity; GO:0006355,regulation of transcription, DNA-templated; GO:0003674,molecular_function; GO:0003676,nucleic acid binding; GO:0005488,binding; GO:0097159,organic cyclic compound binding; GO:1901363,heterocyclic compound binding; GO:0140110,transcription regulator…	PF00010.26:Helix-loop-helix DNA-binding domain	bHLH	TF	bHLH
MS.gene004289	13.65	11.57	6.82	2.73	2.85	1.38	186.16	495.07	585.4	393.69	161.69	305.29	18	17	11	4	4	2	251	719	806	531	241	376	chr2.4	68352619	68352795	+	--	--	--	--	XP_013462598.1	--	--	--	--	--	--	--
MS.gene004334	6.16	11.06	0.3	0	0	0.49	3.01	0.49	0	1.95	0	0	34	68	2	0	0	3	17	3	0	11	0	0	chr2.3	68487457	68489796	-	--	--	--	--	XP_003593775.1	OBP2A_ARATH RecName: Full=Oil body-associated protein 2A {ECO:0000303|PubMed:24406791};	At5g45690	--	PF06884.11:Protein of unknown function (DUF1264)	--	--	--
MS.gene004354	4.74	4.87	2.22	2.74	15.31	1.23	18.23	20.31	49.67	22.53	63.28	77.66	14	16	8	9	48	4	55	66	153	68	211	214	chr2.4	67818310	67818705	-	--	--	--	--	XP_013462645.1	--	At1g29640	--	PF04520.13:Senescence regulator	--	--	--
MS.gene004374	22.36	24.67	9.92	5.75	5.41	0.58	100.64	105.04	149.98	53.12	96.7	199.83	35	43	19	10	9	1	161	181	245	85	171	292	chr2.4	67583854	67585630	+	--	--	K02923 large subunit ribosomal protein L38e | (GenBank) 60S ribosomal protein L38A (A)	ko03010: Ribosome	XP_003593868.1	RL38_ARATH RecName: Full=60S ribosomal protein L38;	At2g43460	GO:0005829,cytosol; GO:0022625,cytosolic large ribosomal subunit; GO:0022626,cytosolic ribosome; GO:0003735,structural constituent of ribosome; GO:0022618,ribonucleoprotein complex assembly; GO:0006412,translation; GO:0003674,molecular_function; GO:0005198,structural molecule activity; GO:0008150,biological_process; GO:0009987,cellular process; GO:0022607,cellular component assembly; GO:0016043,c…	PF01781.18:Ribosomal L38e protein family	--	--	--
MS.gene004395	0.94	1.34	1.2	1.94	8	3.87	1.97	1.53	1.75	15.09	4.81	2.87	34	54	53	78	308	154	73	61	66	559	197	97	chr2.4	67344570	67364879	+	--	--	K05665 ATP-binding cassette, subfamily C (CFTR/MRP), member 1 [EC:7.6.2.3] | (RefSeq) ABC transporter C family member 2 (A)	ko02010: ABC transporters	XP_003593890.2	AB2C_ARATH RecName: Full=ABC transporter C family member 2; Short=ABC transporter ABCC.2; Short=AtABCC2; EC=7.6.2.2; AltName: Full=ATP-energized glutathione S-conjugate pump 2; AltName: Full=Glutathione S-conjugate-transporting ATPase 2; AltName: Full=Multidrug resistance-associated protein 2;	At2g34660	GO:0005783,endoplasmic reticulum; GO:0016021,integral component of membrane; GO:0016020,membrane; GO:0000325,plant-type vacuole; GO:0005774,vacuolar membrane; GO:0005773,vacuole; GO:1902417,(+)-abscisic acid D-glucopyranosyl ester transmembrane transporter activity; GO:0008559,xenobiotic transmembrane transporting ATPase activity; GO:0005524,ATP binding; GO:0042626,ATPase activity, coupled to tra…	PF00664.23:ABC transporter transmembrane region	--	--	--
MS.gene00441	6.62	5.77	0.46	0.34	0.71	0.92	0.43	0.69	0.36	0.49	0.67	2.77	105	102	9	6	12	16	7	12	6	8	12	41	chr1.4	11868415	11871788	+	--	--	K22753 E3 ubiquitin-protein ligase RNF6 [EC:2.3.2.27] | (RefSeq) E3 ubiquitin-protein ligase MBR2-like (A)	--	XP_003589164.1	RHG1A_ARATH RecName: Full=Probable E3 ubiquitin-protein ligase RHG1A {ECO:0000305}; EC=2.3.2.27; AltName: Full=RING-H2 finger G1a {ECO:0000303|PubMed:9781696}; AltName: Full=RING-H2 zinc finger protein RHG1a {ECO:0000305}; AltName: Full=RING-type E3 ubiquitin transferase RHG1A {ECO:0000305};	At1g45180	GO:0046872,metal ion binding; GO:0061630,ubiquitin protein ligase activity; GO:0003674,molecular_function; GO:0005488,binding; GO:0043167,ion binding; GO:0043169,cation binding; GO:0003824,catalytic activity; GO:0004842,ubiquitin-protein transferase activity; GO:0016740,transferase activity; GO:0019787,ubiquitin-like protein transferase activity; GO:0061659,ubiquitin-like protein ligase activity;…	PF13639.6:Ring finger domain	--	--	--
MS.gene004434	36.35	6.75	34.3	5.82	51.12	31.72	3.8	6.43	1.41	8.36	5.65	5.27	421	87	486	75	629	404	45	82	17	99	74	57	chr2.4	67131953	67133506	+	--	--	K09832 sterol 22-desaturase [EC:1.14.19.41] | (GenBank) cytochrome P450 family monooxygenase (A)	ko00100: Steroid biosynthesis; ko01100: Metabolic pathways; ko01110: Biosynthesis of secondary metabolites	XP_003593948.2	C7111_SOLLC RecName: Full=Cytochrome P450 710A11 {ECO:0000303|PubMed:16531502}; EC=1.14.19.41 {ECO:0000269|PubMed:16531502}; AltName: Full=C-22 sterol desaturase {ECO:0000303|PubMed:16531502};	At2g34500	GO:0016021,integral component of membrane; GO:0020037,heme binding; GO:0005506,iron ion binding; GO:0004497,monooxygenase activity; GO:0016491,oxidoreductase activity; GO:0016705,oxidoreductase activity, acting on paired donors, with incorporation or reduction of molecular oxygen; GO:0016126,sterol biosynthetic process; GO:0016125,sterol metabolic process; GO:0003674,molecular_function; GO:000548…	PF00067.22:Cytochrome P450	--	--	--
MS.gene004470	2.4	1.67	0.87	0.36	3.63	3.87	4.69	21.52	6.76	8.33	5.42	6.7	18	14	8	3	29	32	36	178	53	64	46	47	chr2.4	66571299	66574740	+	--	--	K19600 tubby and related proteins | (GenBank) tubby-F-box-like protein (A)	--	XP_003594006.1	TLP3_ARATH RecName: Full=Tubby-like F-box protein 3; Short=AtTLP3;	At2g47900	GO:0005654,nucleoplasm; GO:0005886,plasma membrane; GO:0009536,plastid; GO:0005622,intracellular; GO:0005575,cellular_component; GO:0005623,cell; GO:0005634,nucleus; GO:0043231,intracellular membrane-bounded organelle; GO:0031974,membrane-enclosed lumen; GO:0031981,nuclear lumen; GO:0043226,organelle; GO:0043227,membrane-bounded organelle; GO:0043229,intracellular organelle; GO:0043233,organelle …	PF01167.18:Tub family	TUB	TF	TUB
MS.gene004491	46.02	47.52	41.22	15.98	64.71	76.41	12.16	6.1	8.38	16.92	18.65	0.1	500	575	548	193	747	913	135	73	95	188	229	1	chr2.4	66370208	66375852	-	--	--	K03444 MFS transporter, SP family, ERD6-like sugar transporter | (GenBank) sugar porter (SP) family MFS transporter (A)	--	XP_003594043.1	EDL16_ARATH RecName: Full=Sugar transporter ERD6-like 16;	At5g18840	GO:0016021,integral component of membrane; GO:0022857,transmembrane transporter activity; GO:0008643,carbohydrate transport; GO:0003674,molecular_function; GO:0005215,transporter activity; GO:0006810,transport; GO:0008150,biological_process; GO:0051179,localization; GO:0051234,establishment of localization; GO:0071702,organic substance transport; GO:0005575,cellular_component; GO:0016020,membrane…	PF00083.24:Sugar (and other) transporter	--	--	--
MS.gene004507	0.64	0.29	0.26	2.87	24.66	3.2	0.31	1.45	3.37	5.31	3.68	18.48	2	1	1	10	82	11	1	5	11	17	13	54	chr2.4	66200878	66201657	+	--	--	K07305 peptide-methionine (R)-S-oxide reductase [EC:1.8.4.12] | (GenBank) methionine sulfoxide reductase B 2 (A)	--	XP_003594065.1	MSRB5_ORYSJ RecName: Full=Peptide methionine sulfoxide reductase B5; Short=OsMSRB5; EC=1.8.4.12; AltName: Full=Peptide-methionine (R)-S-oxide reductase;	At4g04830	GO:0005829,cytosol; GO:0046872,metal ion binding; GO:0033743,peptide-methionine (R)-S-oxide reductase activity; GO:0030091,protein repair; GO:0006979,response to oxidative stress; GO:0003674,molecular_function; GO:0005488,binding; GO:0043167,ion binding; GO:0043169,cation binding; GO:0003824,catalytic activity; GO:0016491,oxidoreductase activity; GO:0016667,oxidoreductase activity, acting on a su…	PF01641.18:SelR domain	--	--	--
MS.gene004508	0.24	0.16	0.1	0.08	0.53	0.27	0.52	0.75	1.66	0.8	0.16	0.03	8	6	4	3	19	10	18	28	59	28	6	1	chr2.4	66183687	66196747	-	--	--	K23719 nuclear mRNA export protein SAC3 | (GenBank) SAC3/GANP/Nin1/mts3/eIF-3 p25 family protein (A)	--	XP_003594068.2	SAC3B_ARATH RecName: Full=SAC3 family protein B {ECO:0000303|PubMed:19843313};	At3g06290	GO:0005737,cytoplasm; GO:0034399,nuclear periphery; GO:0005634,nucleus; GO:0070390,transcription export complex 2; GO:0006406,mRNA export from nucleus; GO:0044030,regulation of DNA methylation; GO:0060968,regulation of gene silencing; GO:0090065,regulation of production of siRNA involved in RNA interference; GO:0008152,metabolic process; GO:0008104,protein localization; GO:0006403,RNA localizatio…	PF03399.16:SAC3/GANP family	--	--	--
MS.gene004523	1.98	4.12	1.62	0.09	0	0.19	0	11.84	1.8	1.94	0.37	0	19	44	19	1	0	2	0	125	18	19	4	0	chr2.4	65963497	65966650	+	--	--	K01915 glutamine synthetase [EC:6.3.1.2] | (GenBank) glutamine synthetase domain protein (A)	ko00220: Arginine biosynthesis; ko00250: Alanine, aspartate and glutamate metabolism; ko00630: Glyoxylate and dicarboxylate metabolism; ko00910: Nitrogen metabolism; ko01100: Metabolic pathways; ko01230: Biosynthesis of amino acids	Q9XQ94.1	GLNA2_MEDSA RecName: Full=Glutamine synthetase leaf isozyme, chloroplastic; EC=6.3.1.2; AltName: Full=GS2; AltName: Full=Glutamate--ammonia ligase; Flags: Precursor;	At5g35630	GO:0009507,chloroplast; GO:0005524,ATP binding; GO:0004356,glutamate-ammonia ligase activity; GO:0006542,glutamine biosynthetic process; GO:0000166,nucleotide binding; GO:0003674,molecular_function; GO:0005488,binding; GO:0008144,drug binding; GO:0017076,purine nucleotide binding; GO:0030554,adenyl nucleotide binding; GO:0032553,ribonucleotide binding; GO:0032555,purine ribonucleotide binding; GO…	PF00120.24:Glutamine synthetase, catalytic domain	--	--	--
MS.gene004535	105.36	42.1	74.06	7.6	21.67	42.78	19.77	0	3.65	0	0.15	0	636	283	547	51	139	284	122	0	23	0	1	0	16959	15423	17701	-	--	--	K15889 prenylcysteine alpha-carboxyl methylesterase [EC:3.1.1.-] | (RefSeq) probable isoprenylcysteine alpha-carbonyl methylesterase ICMEL2 (A)	ko00900: Terpenoid backbone biosynthesis; ko01100: Metabolic pathways; ko01110: Biosynthesis of secondary metabolites	PNX66071.1	--	At5g53670	--	PF14223.6:gag-polypeptide of LTR copia-type	--	--	--
MS.gene004548	1.12	1.56	1	0	1.44	0.37	12.56	24.06	2.44	0.7	0.99	0	11	17	12	0	15	4	126	260	25	7	11	0	chr2.1	56913533	56920736	+	--	--	K12862 pleiotropic regulator 1 | (GenBank) PP1/PP2A phosphatase pleiotropic regulator PRL1 (A)	ko03040: Spliceosome	XP_013463226.1	PRL2_ARATH RecName: Full=Protein pleiotropic regulator PRL2;	At3g16650	GO:0071013,catalytic step 2 spliceosome; GO:0080008,Cul4-RING E3 ubiquitin ligase complex; GO:0000974,Prp19 complex; GO:0000398,mRNA splicing, via spliceosome; GO:0000375,RNA splicing, via transesterification reactions; GO:0000377,RNA splicing, via transesterification reactions with bulged adenosine as nucleophile; GO:0008152,metabolic process; GO:0006139,nucleobase-containing compound metabolic …	PF00400.32:WD domain, G-beta repeat	--	--	--
MS.gene004558	14.64	11.17	16.53	7.71	24.18	10.25	6.91	7.33	5.57	1.04	2.53	0.27	466	396	644	273	818	359	225	257	185	34	91	8	chr2.2	52543252	52552157	+	--	--	K05665 ATP-binding cassette, subfamily C (CFTR/MRP), member 1 [EC:7.6.2.3] | (RefSeq) ABC transporter C family member 14-like (A)	ko02010: ABC transporters	XP_013463245.1	AB14C_ARATH RecName: Full=ABC transporter C family member 14; Short=ABC transporter ABCC.14; Short=AtABCC14; EC=7.6.2.2; AltName: Full=ATP-energized glutathione S-conjugate pump 10; AltName: Full=Glutathione S-conjugate-transporting ATPase 10; AltName: Full=Multidrug resistance-associated protein 10;	At3g62700	GO:0005829,cytosol; GO:0005794,Golgi apparatus; GO:0016021,integral component of membrane; GO:0016020,membrane; GO:0000325,plant-type vacuole; GO:0005774,vacuolar membrane; GO:0005773,vacuole; GO:0008559,xenobiotic transmembrane transporting ATPase activity; GO:0005524,ATP binding; GO:0042626,ATPase activity, coupled to transmembrane movement of substances; GO:0055085,transmembrane transport; GO:…	PF00664.23:ABC transporter transmembrane region	--	--	--
MS.gene004562	10.08	15.21	14.94	3.01	9.53	7.57	4.83	3.6	3.71	1.84	3.36	0.66	247	415	448	82	248	204	121	97	95	46	93	15	chr2.2	52443930	52451228	+	--	--	K05665 ATP-binding cassette, subfamily C (CFTR/MRP), member 1 [EC:7.6.2.3] | (RefSeq) ABC transporter C family member 14-like (A)	ko02010: ABC transporters	XP_013463246.1	AB14C_ARATH RecName: Full=ABC transporter C family member 14; Short=ABC transporter ABCC.14; Short=AtABCC14; EC=7.6.2.2; AltName: Full=ATP-energized glutathione S-conjugate pump 10; AltName: Full=Glutathione S-conjugate-transporting ATPase 10; AltName: Full=Multidrug resistance-associated protein 10;	At3g62700	GO:0005829,cytosol; GO:0005794,Golgi apparatus; GO:0016021,integral component of membrane; GO:0016020,membrane; GO:0000325,plant-type vacuole; GO:0005774,vacuolar membrane; GO:0005773,vacuole; GO:0008559,xenobiotic transmembrane transporting ATPase activity; GO:0005524,ATP binding; GO:0042626,ATPase activity, coupled to transmembrane movement of substances; GO:0055085,transmembrane transport; GO:…	PF00664.23:ABC transporter transmembrane region	--	--	--
MS.gene004564	22.66	46.59	27.29	42.91	5.61	13.56	4.08	1.08	3.43	2.33	13.19	17.25	38	87	56	80	10	25	7	2	6	4	25	27	chr2.4	54845820	54846044	-	--	--	K10532 heparan-alpha-glucosaminide N-acetyltransferase [EC:2.3.1.78] | (RefSeq) uncharacterized protein LOC8057796 (A)	ko00531: Glycosaminoglycan degradation; ko01100: Metabolic pathways	XP_013463249.1	--	At4g15830	GO:0005881,cytoplasmic microtubule; GO:0008017,microtubule binding; GO:0000226,microtubule cytoskeleton organization; GO:0005515,protein binding; GO:0003674,molecular_function; GO:0005488,binding; GO:0008092,cytoskeletal protein binding; GO:0015631,tubulin binding; GO:0007017,microtubule-based process; GO:0007010,cytoskeleton organization; GO:0006996,organelle organization; GO:0008150,biological_…	--	--	--	--
MS.gene004567	10.39	4.63	5.37	3.74	1.49	0.98	1.22	0.08	1.04	4.96	0.22	0	125	62	79	50	19	13	15	1	13	61	3	0	chr2.2	52407645	52414831	+	--	--	K05931 type I protein arginine methyltransferase [EC:2.1.1.319] | (GenBank) histone-arginine methyltransferase, putative (A)	--	XP_013463251.1	ANM14_ARATH RecName: Full=Probable histone-arginine methyltransferase 1.4; Short=AtPRMT14; EC=2.1.1.319; AltName: Full=Coactivator-associated methyltransferase 1B; AltName: Full=Protein arginine N-methyltransferase 4A; Short=AtPRMT4A;	At5g49020	GO:0009507,chloroplast; GO:0005737,cytoplasm; GO:0005634,nucleus; GO:0016277,[myelin basic protein]-arginine N-methyltransferase activity; GO:0008469,histone-arginine N-methyltransferase activity; GO:0046982,protein heterodimerization activity; GO:0042803,protein homodimerization activity; GO:0035242,protein-arginine omega-N asymmetric methyltransferase activity; GO:0035241,protein-arginine omega…	PF13649.6:Methyltransferase domain	--	--	--
MS.gene004598	0.25	0.11	0.1	0.79	3.42	2.39	0.74	2.62	1.56	1.35	1.11	0	2	1	1	7	29	21	6	23	13	11	10	0	chr2.2	51993058	51997615	-	--	--	K05658 ATP-binding cassette, subfamily B (MDR/TAP), member 1 [EC:7.6.2.2] | (RefSeq) uncharacterized protein LOC111781709 (A)	ko02010: ABC transporters	XP_013463298.1	SRG1_ARATH RecName: Full=Protein SRG1; Short=AtSRG1; AltName: Full=Protein SENESCENCE-RELATED GENE 1;	At3g21420	GO:0046872,metal ion binding; GO:0016682,oxidoreductase activity, acting on diphenols and related substances as donors, oxygen as acceptor; GO:0010150,leaf senescence; GO:0003674,molecular_function; GO:0005488,binding; GO:0043167,ion binding; GO:0043169,cation binding; GO:0003824,catalytic activity; GO:0016491,oxidoreductase activity; GO:0016679,oxidoreductase activity, acting on diphenols and re…	PF14226.6:non-haem dioxygenase in morphine synthesis N-terminal	--	--	--
MS.gene004599	0.06	0	0	0	2.95	4.71	0	3.34	0.58	3.06	0.91	0	1	0	0	0	52	86	0	61	10	52	17	0	chr2.2	51979157	51987086	+	--	--	K03347 cullin 1 | (GenBank) cullin 3B (A)	ko04120: Ubiquitin mediated proteolysis; ko04141: Protein processing in endoplasmic reticulum	XP_013463300.1	CUL1_ARATH RecName: Full=Cullin-1;	At4g02570	GO:0000794,condensed nuclear chromosome; GO:0031461,cullin-RING ubiquitin ligase complex; GO:0005737,cytoplasm; GO:0005829,cytosol; GO:0005634,nucleus; GO:0009524,phragmoplast; GO:0005819,spindle; GO:0031625,ubiquitin protein ligase binding; GO:0004842,ubiquitin-protein transferase activity; GO:0009734,auxin-activated signaling pathway; GO:0007049,cell cycle; GO:0009793,embryo development ending …	PF00888.22:Cullin family	--	--	--
MS.gene004682	1.23	5.17	3.87	14.89	11.13	15.89	41.55	103.66	24.04	75.32	133.68	123.56	12	56	46	161	115	170	413	1110	244	749	1469	1122	chr1.1	54631779	54633083	-	--	--	K22683 aspartyl protease family protein [EC:3.4.23.-] | (RefSeq) aspartyl protease family protein 2 (A)	--	XP_003590665.1	GIP2_NICBE RecName: Full=Probable aspartic proteinase GIP2 {ECO:0000305}; EC=3.4.23.- {ECO:0000305}; AltName: Full=Glucanase inhibitor protein 2 {ECO:0000303|PubMed:28082413}; Short=NbGIP2 {ECO:0000303|PubMed:28082413}; Flags: Precursor;	At1g03220	GO:0048046,apoplast; GO:0004190,aspartic-type endopeptidase activity; GO:0006952,defense response; GO:0003674,molecular_function; GO:0003824,catalytic activity; GO:0004175,endopeptidase activity; GO:0008233,peptidase activity; GO:0070011,peptidase activity, acting on L-amino acid peptides; GO:0016787,hydrolase activity; GO:0070001,aspartic-type peptidase activity; GO:0140096,catalytic activity, a…	PF14541.6:Xylanase inhibitor C-terminal	--	--	--
MS.gene00469	36.63	43.37	63.24	357	205.98	127.51	110.2	95.95	58.23	90.84	73.83	33.21	267	352	564	2893	1595	1022	821	770	443	677	608	226	chr1.4	4439712	4441690	+	--	--	K13051 L-asparaginase / beta-aspartyl-peptidase [EC:3.5.1.1 3.4.19.5] | (GenBank) isoaspartyl peptidase/L-asparaginase (A)	ko00250: Alanine, aspartate and glutamate metabolism; ko00460: Cyanoamino acid metabolism; ko01100: Metabolic pathways; ko01110: Biosynthesis of secondary metabolites	XP_003589126.1	ASPGB_ARATH RecName: Full=Probable isoaspartyl peptidase/L-asparaginase 2; EC=3.4.19.5; AltName: Full=L-asparagine amidohydrolase 2; Contains: RecName: Full=Isoaspartyl peptidase/L-asparaginase 2 subunit alpha; Contains: RecName: Full=Isoaspartyl peptidase/L-asparaginase 2 subunit beta; Flags: Precursor;	At3g16150	GO:0005737,cytoplasm; GO:0004067,asparaginase activity; GO:0008798,beta-aspartyl-peptidase activity; GO:0016540,protein autoprocessing; GO:0003674,molecular_function; GO:0003824,catalytic activity; GO:0016787,hydrolase activity; GO:0016810,hydrolase activity, acting on carbon-nitrogen (but not peptide) bonds; GO:0016811,hydrolase activity, acting on carbon-nitrogen (but not peptide) bonds, in lin…	PF01112.18:Asparaginase	--	--	--
MS.gene004699	0	0	0.03	0.06	0	0.16	0.14	0.48	0.99	0.49	1.01	0.23	0	0	1	2	0	5	4	15	29	14	32	6	chr1.1	54924157	54946732	+	--	--	K03657 DNA helicase II / ATP-dependent DNA helicase PcrA [EC:3.6.4.12] | (RefSeq) ATP-dependent DNA helicase srs2-like (A)	ko03420: Nucleotide excision repair; ko03430: Mismatch repair	XP_003590707.2	SRS2L_ARATH RecName: Full=ATP-dependent DNA helicase SRS2-like protein At4g25120; EC=3.6.4.12; AltName: Full=AtSRS2;	At4g25120	GO:0005634,nucleus; GO:0043138,3'-5' DNA helicase activity; GO:0005524,ATP binding; GO:0003677,DNA binding; GO:0003678,DNA helicase activity; GO:0006310,DNA recombination; GO:0036292,DNA rewinding; GO:0000725,recombinational repair; GO:0003674,molecular_function; GO:0003824,catalytic activity; GO:0017111,nucleoside-triphosphatase activity; GO:0004386,helicase activity; GO:0016462,pyrophosphatase …	PF00580.21:UvrD/REP helicase N-terminal domain	--	--	--
MS.gene004707	0.25	0	0.61	1.12	0.47	0.68	3.89	1.81	40.95	0.97	1.1	0.27	1	0	3	5	2	3	16	8	172	4	5	1	chr1.1	55069873	55073344	+	--	--	K14396 polyadenylate-binding protein 2 | (RefSeq) polyadenylate-binding protein 1 (A)	ko03015: mRNA surveillance pathway	ACJ85460.1	PABN1_ARATH RecName: Full=Polyadenylate-binding protein 1 {ECO:0000303|PubMed:18479511}; Short=AtPabN1 {ECO:0000303|PubMed:18479511}; Short=Poly(A)-binding protein 1 {ECO:0000303|PubMed:18479511}; AltName: Full=Nuclear poly(A)-binding protein 1 {ECO:0000305}; AltName: Full=Poly(A)-binding protein I {ECO:0000305}; Short=PABI {ECO:0000305};	At5g51120	GO:0005737,cytoplasm; GO:0016607,nuclear speck; GO:0003723,RNA binding; GO:0006397,mRNA processing; GO:0003674,molecular_function; GO:0003676,nucleic acid binding; GO:0005488,binding; GO:0097159,organic cyclic compound binding; GO:1901363,heterocyclic compound binding; GO:0008152,metabolic process; GO:0006139,nucleobase-containing compound metabolic process; GO:0006396,RNA processing; GO:0006725,…	PF00076.22:RNA recognition motif. (a.k.a. RRM, RBD, or RNP domain)	--	--	--
MS.gene004712	0.82	0	0.67	5.68	2.58	20.21	42.95	21.93	7.36	20.13	12.63	10.29	3	0	3	23	10	81	160	88	28	75	52	35	chr1.1	55137459	55138242	+	--	--	--	--	GAU11256.1	--	--	--	--	--	--	--
MS.gene004713	1.34	1.73	0.48	4.59	0.87	5.4	12.19	18.76	18.34	15.13	9.91	0	16	23	7	61	11	71	149	247	229	185	134	0	chr1.1	55144807	55150997	+	--	--	K01904 4-coumarate--CoA ligase [EC:6.2.1.12] | (RefSeq) 4-coumarate--CoA ligase-like 9 (A)	ko00130: Ubiquinone and other terpenoid-quinone biosynthesis; ko00940: Phenylpropanoid biosynthesis; ko01100: Metabolic pathways; ko01110: Biosynthesis of secondary metabolites	XP_003590732.1	4CLL9_ARATH RecName: Full=4-coumarate--CoA ligase-like 9 {ECO:0000303|PubMed:12805634}; EC=6.2.1.- {ECO:0000305|PubMed:15677481, ECO:0000305|PubMed:18267944}; AltName: Full=4-coumarate--CoA ligase isoform 4; Short=At4CL4;	At5g63380	GO:0005777,peroxisome; GO:0005524,ATP binding; GO:0016405,CoA-ligase activity; GO:0102391,decanoate-CoA ligase activity; GO:0004321,fatty-acyl-CoA synthase activity; GO:0006633,fatty acid biosynthetic process; GO:0009695,jasmonic acid biosynthetic process; GO:0031408,oxylipin biosynthetic process; GO:0000166,nucleotide binding; GO:0003674,molecular_function; GO:0005488,binding; GO:0008144,drug bi…	PF00501.28:AMP-binding enzyme	--	--	--
MS.gene004753	4.66	4.18	3.81	0.42	12.72	66.94	40.11	17.77	8.48	30.53	14.84	0	10	10	10	1	29	158	88	42	19	67	36	0	chr1.1	55678679	55678966	-	--	--	--	--	XP_013468654.1	--	--	--	--	--	--	--
MS.gene00476	10.7	18.77	16.29	103.63	30.66	41.56	96.08	185.9	68	39.94	46.47	0	22	43	41	237	67	94	202	421	146	84	108	0	chr1.4	4580754	4581691	-	--	--	K03860 phosphatidylinositol N-acetylglucosaminyltransferase subunit Q | (RefSeq) N-acetylglucosaminyl-phosphatidylinositol biosynthetic protein gpi1-like (A)	ko00563: Glycosylphosphatidylinositol (GPI)-anchor biosynthesis; ko01100: Metabolic pathways	XP_003589114.1	SNAK1_SOLTU RecName: Full=Snakin-1; Flags: Precursor;	At2g14900	GO:0005618,cell wall; GO:0005576,extracellular region; GO:0006952,defense response; GO:0006950,response to stress; GO:0008150,biological_process; GO:0050896,response to stimulus; GO:0005575,cellular_component; GO:0005623,cell; GO:0030312,external encapsulating structure; GO:0044464,cell part; GO:0071944,cell periphery	PF02704.14:Gibberellin regulated protein	--	--	--
MS.gene004771	1.28	2.01	4.96	1.72	1.8	0.58	5.63	5.22	5.51	13.12	14.42	36.96	4	7	19	6	6	2	18	18	18	42	51	108	chr1.4	60975443	60975862	+	--	--	K09286 EREBP-like factor | (RefSeq) ethylene-responsive transcription factor ERF105-like (A)	--	XP_013468688.1	ERF96_ARATH RecName: Full=Ethylene-responsive transcription factor ERF096;	At5g43410	GO:0005634,nucleus; GO:0003700,DNA-binding transcription factor activity; GO:0043565,sequence-specific DNA binding; GO:0009873,ethylene-activated signaling pathway; GO:0009789,positive regulation of abscisic acid-activated signaling pathway; GO:0010186,positive regulation of cellular defense response; GO:0045893,positive regulation of transcription, DNA-templated; GO:0090332,stomatal closure; GO:…	PF00847.20:AP2 domain	AP2/ERF-ERF	TF	AP2/ERF->AP2/ERF-ERF
MS.gene004776	0	0	0	0	0	0	0.61	1.33	5.21	1.23	3.51	6.72	0	0	0	0	0	0	3	7	26	6	19	30	chr1.4	61075788	61076429	+	--	--	K14516 ethylene-responsive transcription factor 1 | (GenBank) ethylene-responsive transcription factor 1B (A)	ko04016: MAPK signaling pathway - plant; ko04075: Plant hormone signal transduction	XP_013468697.1	ERF92_ARATH RecName: Full=Ethylene-responsive transcription factor 1B; Short=AtERF1B; AltName: Full=Ethylene-responsive element-binding factor 1B; Short=EREBP-1B;	At3g23240	GO:0005634,nucleus; GO:0003677,DNA binding; GO:0003700,DNA-binding transcription factor activity; GO:0000976,transcription regulatory region sequence-specific DNA binding; GO:0006952,defense response; GO:0009873,ethylene-activated signaling pathway; GO:0009867,jasmonic acid mediated signaling pathway; GO:0003674,molecular_function; GO:0003676,nucleic acid binding; GO:0005488,binding; GO:0097159,o…	PF00847.20:AP2 domain	AP2/ERF-ERF	TF	AP2/ERF->AP2/ERF-ERF
MS.gene004787	1.06	0.66	3.43	0.12	0.19	0.18	15.69	4.84	15.18	0.85	0.82	0	16	11	63	2	3	3	241	80	238	13	14	0	chr1.4	61298115	61303502	-	--	--	--	--	XP_003590760.1	SEOB_ARATH RecName: Full=Protein SIEVE ELEMENT OCCLUSION B {ECO:0000303|PubMed:20932300}; Short=AtSEOb {ECO:0000303|PubMed:20932300}; AltName: Full=Protein SIEVE ELEMENT OCCLUSION-RELATED 1 {ECO:0000303|PubMed:22470058}; Short=AtSEOR1 {ECO:0000303|PubMed:22470058};	At3g01680	GO:0042803,protein homodimerization activity; GO:0043621,protein self-association; GO:0010088,phloem development; GO:0005515,protein binding; GO:0003674,molecular_function; GO:0005488,binding; GO:0046983,protein dimerization activity; GO:0042802,identical protein binding; GO:0009888,tissue development; GO:0008150,biological_process; GO:0010087,phloem or xylem histogenesis; GO:0032502,developmenta…	PF14576.6:Sieve element occlusion N-terminus	--	--	--
MS.gene004790	38.02	66.99	165.02	0.57	0.15	0.15	0.31	8.27	68.56	0.47	2.54	0	238	467	1264	4	1	1	2	57	448	3	18	0	chr1.4	61376691	61377530	-	--	--	--	--	XP_003599063.1	LECN_PEA RecName: Full=Non-seed lectin; Flags: Precursor;	At5g65600	GO:0030246,carbohydrate binding; GO:0003674,molecular_function; GO:0005488,binding	PF00139.19:Legume lectin domain	--	--	--
MS.gene004794	1.95	1.81	8.25	2.42	0	0	0	0	0.45	0	0.24	0	29	30	150	40	0	0	0	0	7	0	4	0	chr1.4	61481010	61486786	+	--	--	K17609 nucleoredoxin [EC:1.8.1.8] | (RefSeq) probable nucleoredoxin 1 (A)	--	XP_013468706.1	SEOB_ARATH RecName: Full=Protein SIEVE ELEMENT OCCLUSION B {ECO:0000303|PubMed:20932300}; Short=AtSEOb {ECO:0000303|PubMed:20932300}; AltName: Full=Protein SIEVE ELEMENT OCCLUSION-RELATED 1 {ECO:0000303|PubMed:22470058}; Short=AtSEOR1 {ECO:0000303|PubMed:22470058};	At3g01680	GO:0042803,protein homodimerization activity; GO:0043621,protein self-association; GO:0010088,phloem development; GO:0005515,protein binding; GO:0003674,molecular_function; GO:0005488,binding; GO:0046983,protein dimerization activity; GO:0042802,identical protein binding; GO:0009888,tissue development; GO:0008150,biological_process; GO:0010087,phloem or xylem histogenesis; GO:0032502,developmenta…	PF14576.6:Sieve element occlusion N-terminus	--	--	--
MS.gene004807	0.61	0	0.07	0.31	0.25	0.4	0	0.16	1.26	0.68	5.8	22.27	7	0	1	4	3	5	0	2	15	8	75	238	chr1.4	61649255	61656309	-	--	--	--	--	XP_003590786.1	NADKC_ARATH RecName: Full=Calmodulin calcium-dependent NAD kinase {ECO:0000305}; EC=2.7.1.23 {ECO:0000269|PubMed:31554701}; AltName: Full=NAD kinase-CaM dependent protein {ECO:0000303|PubMed:31554701}; Short=NADKc {ECO:0000303|PubMed:31554701};	At1g04280	GO:0005741,mitochondrial outer membrane; GO:0005524,ATP binding; GO:0005516,calmodulin binding; GO:0003951,NAD+ kinase activity; GO:0000166,nucleotide binding; GO:0003674,molecular_function; GO:0005488,binding; GO:0008144,drug binding; GO:0017076,purine nucleotide binding; GO:0030554,adenyl nucleotide binding; GO:0032553,ribonucleotide binding; GO:0032555,purine ribonucleotide binding; GO:0032559…	PF06414.12:Zeta toxin	--	--	--
MS.gene004812	5.93	10.66	36.08	230.96	128.21	116.09	187.92	144.22	134.38	49.26	66.74	32.25	41	82	305	1774	941	882	1327	1097	969	348	521	208	chr1.4	61704555	61709629	+	--	--	K10886 DNA-repair protein XRCC4 | (GenBank) DNA-repair protein XRCC4, putative (A)	ko03450: Non-homologous end-joining	XP_003590794.1	XRCC4_ARATH RecName: Full=DNA repair protein XRCC4;	At3g23100	GO:0032807,DNA ligase IV complex; GO:0005958,DNA-dependent protein kinase-DNA ligase 4 complex; GO:0005524,ATP binding; GO:0003677,DNA binding; GO:0051103,DNA ligation involved in DNA repair; GO:0006310,DNA recombination; GO:0006303,double-strand break repair via nonhomologous end joining; GO:0051351,positive regulation of ligase activity; GO:0010165,response to X-ray; GO:0000166,nucleotide bindi…	PF06632.12:DNA double-strand break repair and V(D)J recombination protein XRCC4	--	--	--
MS.gene004830	1.97	0.39	1.26	0.06	0.52	0.73	0.06	0.17	0	0.24	0.71	1.98	32	7	25	1	9	13	1	3	0	4	13	30	chr1.4	61938323	61941622	+	--	--	K10398 kinesin family member 11 | (GenBank) kinesin motor domain protein (A)	--	XP_003590831.1	KN10A_ARATH RecName: Full=Kinesin-like protein KIN-10A {ECO:0000305}; AltName: Full=Phragmoplast-associated kinesin-related protein 2 {ECO:0000303|PubMed:11701879}; Short=AtPAKRP2 {ECO:0000303|PubMed:11701879};	At4g14330	GO:0005737,cytoplasm; GO:0005871,kinesin complex; GO:0005874,microtubule; GO:0009524,phragmoplast; GO:0005524,ATP binding; GO:1990939,ATP-dependent microtubule motor activity; GO:0016887,ATPase activity; GO:0008017,microtubule binding; GO:0003777,microtubule motor activity; GO:0007018,microtubule-based movement; GO:0031535,plus-end directed microtubule sliding; GO:0047496,vesicle transport along …	PF00225.23:Kinesin motor domain	--	--	--
MS.gene004832	44.29	10.68	14.59	2.97	3.73	9.42	4.53	3.4	3.17	5.17	1.95	0	201	54	81	15	18	47	21	17	15	24	10	0	chr1.4	61945846	61948773	-	--	--	K07300 Ca2+:H+ antiporter | (RefSeq) cax1; Ca2+/H+ antiporter, cation antiporter, membrane protein (A)	--	XP_003590834.1	GLTP1_ARATH RecName: Full=Glycolipid transfer protein 1 {ECO:0000303|PubMed:16309699};	At2g33470	GO:0005829,cytosol; GO:0016020,membrane; GO:0005886,plasma membrane; GO:1902387,ceramide 1-phosphate binding; GO:1902388,ceramide 1-phosphate transporter activity; GO:0035627,ceramide transport; GO:0120009,intermembrane lipid transfer; GO:0003674,molecular_function; GO:0005488,binding; GO:0005543,phospholipid binding; GO:0008289,lipid binding; GO:0033218,amide binding; GO:0043167,ion binding; GO:…	PF08718.11:Glycolipid transfer protein (GLTP)	--	--	--
MS.gene004833	1520.74	316.51	864.77	450.63	147.35	244.64	82.29	220.4	271.82	248.75	20.38	154.8	4556	1056	3170	1501	469	806	252	727	850	762	69	433	chr1.4	61951206	61952631	+	--	--	K02875 large subunit ribosomal protein L14e | (GenBank) 60S ribosomal L14-like protein (A)	ko03010: Ribosome	XP_003590835.1	RL14_PEA RecName: Full=Probable 60S ribosomal protein L14; AltName: Full=Hydroxyproline-rich glycoprotein HRGP1;	At2g20450	GO:0005840,ribosome; GO:0003723,RNA binding; GO:0003735,structural constituent of ribosome; GO:0006412,translation; GO:0003674,molecular_function; GO:0003676,nucleic acid binding; GO:0005488,binding; GO:0097159,organic cyclic compound binding; GO:1901363,heterocyclic compound binding; GO:0005198,structural molecule activity; GO:0008152,metabolic process; GO:0006518,peptide metabolic process; GO:0…	PF01929.17:Ribosomal protein L14	--	--	--
MS.gene004835	1.47	0.8	1.02	0.35	0.07	0.62	0.35	0	0.1	1.15	1.2	1.84	41	25	35	11	2	19	10	0	3	33	38	48	chr1.4	61958873	61966586	-	--	--	K05658 ATP-binding cassette, subfamily B (MDR/TAP), member 1 [EC:7.6.2.2] | (RefSeq) uncharacterized protein LOC111274727 isoform X1 (A)	ko02010: ABC transporters	XP_003590837.2	CIP7_ARATH RecName: Full=COP1-interacting protein 7 {ECO:0000303|PubMed:9668129};	At5g43310	GO:0005634,nucleus; GO:0005886,plasma membrane; GO:0009718,anthocyanin-containing compound biosynthetic process; GO:0015995,chlorophyll biosynthetic process; GO:0045893,positive regulation of transcription, DNA-templated; GO:0009416,response to light stimulus; GO:0008152,metabolic process; GO:0008150,biological_process; GO:0009058,biosynthetic process; GO:0009812,flavonoid metabolic process; GO:0…	--	--	--	--
MS.gene004888	0.28	1.02	0.39	10.01	1.42	4.38	0.55	0.6	0.72	4.15	2.76	2.93	3	12	5	118	16	51	6	7	8	45	33	29	chr1.4	62713663	62715659	+	--	--	K15397 3-ketoacyl-CoA synthase [EC:2.3.1.199] | (GenBank) 3-ketoacyl-CoA synthase-like protein (A)	ko00062: Fatty acid elongation; ko01100: Metabolic pathways; ko01110: Biosynthesis of secondary metabolites; ko04626: Plant-pathogen interaction	XP_013468760.1	KCS11_ARATH RecName: Full=3-ketoacyl-CoA synthase 11 {ECO:0000303|PubMed:18465198}; Short=KCS-11 {ECO:0000303|PubMed:18465198}; EC=2.3.1.199 {ECO:0000269|PubMed:16765910}; AltName: Full=Very long-chain fatty acid condensing enzyme 11 {ECO:0000303|PubMed:18465198}; Short=VLCFA condensing enzyme 11 {ECO:0000303|PubMed:18465198};	At2g26640	GO:0016021,integral component of membrane; GO:0102336,3-oxo-arachidoyl-CoA synthase activity; GO:0102337,3-oxo-cerotoyl-CoA synthase activity; GO:0102338,3-oxo-lignoceronyl-CoA synthase activity; GO:0102756,very-long-chain 3-ketoacyl-CoA synthase activity; GO:0006633,fatty acid biosynthetic process; GO:0009409,response to cold; GO:0009416,response to light stimulus; GO:0003674,molecular_function;…	PF08392.12:FAE1/Type III polyketide synthase-like protein	--	--	--
MS.gene004904	8.57	5.44	8.05	0.33	1.5	1.72	3.89	1.56	5.39	3.59	2.76	0	140	99	161	6	26	31	65	28	92	60	51	0	chr1.4	63029423	63034079	+	--	--	K16732 Ase1/PRC1/MAP65 family protein | (GenBank) microtubule associated protein, MAP65/ASE1 family protein (A)	--	XP_013468782.1	MA653_ARATH RecName: Full=65-kDa microtubule-associated protein 3; Short=AtMAP65-3; AltName: Full=Protein PLEIADE;	At5g51600	GO:0055028,cortical microtubule; GO:0005737,cytoplasm; GO:0005874,microtubule; GO:0005634,nucleus; GO:0009524,phragmoplast; GO:0009574,preprophase band; GO:0005819,spindle; GO:0008017,microtubule binding; GO:0000911,cytokinesis by cell plate formation; GO:0052096,formation by symbiont of syncytium involving giant cell for nutrient acquisition from host; GO:0000226,microtubule cytoskeleton organiz…	PF03999.12:Microtubule associated protein (MAP65/ASE1 family)	--	--	--
MS.gene004927	4.37	6.95	7.42	37.66	38.14	25.69	24.18	39.4	31.41	58.54	80.96	18.91	26	46	54	249	241	168	147	258	195	356	544	105	chr1.4	63202934	63204511	-	--	--	K15777 4,5-DOPA dioxygenase extradiol [EC:1.13.11.-] | (GenBank) 4,5-DOPA dioxygenase extradiol-like protein (A)	ko00965: Betalain biosynthesis	XP_013468810.1	DIOXL_ARATH RecName: Full=Extradiol ring-cleavage dioxygenase; Short=AtLigB; EC=1.13.11.-;	At4g15090_2	GO:0051213,dioxygenase activity; GO:0008198,ferrous iron binding; GO:0016701,oxidoreductase activity, acting on single donors with incorporation of molecular oxygen; GO:0008270,zinc ion binding; GO:0006725,cellular aromatic compound metabolic process; GO:0003674,molecular_function; GO:0003824,catalytic activity; GO:0016491,oxidoreductase activity; GO:0005488,binding; GO:0046872,metal ion binding;…	PF02900.18:Catalytic LigB subunit of aromatic ring-opening dioxygenase	--	--	--
MS.gene004947	0	0.19	0	0.78	0	0	1.48	0.88	2.37	1.26	1.24	0	0	2	0	8	0	0	14	9	23	12	13	0	chr1.4	63480552	63485546	-	--	--	K07407 alpha-galactosidase [EC:3.2.1.22] | (GenBank) alpha-galactosidase-like protein (A)	ko00052: Galactose metabolism; ko00561: Glycerolipid metabolism; ko00600: Sphingolipid metabolism; ko00603: Glycosphingolipid biosynthesis - globo and isoglobo series; ko01100: Metabolic pathways	XP_013468838.1	AGAL_CYATE RecName: Full=Alpha-galactosidase; EC=3.2.1.22; AltName: Full=Alpha-D-galactoside galactohydrolase; AltName: Full=Melibiase; Flags: Precursor;	At5g08370	GO:0052692,raffinose alpha-galactosidase activity; GO:0005975,carbohydrate metabolic process; GO:0003674,molecular_function; GO:0003824,catalytic activity; GO:0004553,hydrolase activity, hydrolyzing O-glycosyl compounds; GO:0004557,alpha-galactosidase activity; GO:0015925,galactosidase activity; GO:0016787,hydrolase activity; GO:0016798,hydrolase activity, acting on glycosyl bonds; GO:0008152,met…	PF16499.5:Alpha galactosidase A	--	--	--
MS.gene004955	0.71	0.48	0.73	8.17	6.04	4.54	6.1	6.15	1.37	2.61	5.36	0	4	3	5	51	36	28	35	38	8	15	34	0	chr1.4	63561984	63562736	+	--	--	K04077 chaperonin GroEL | (RefSeq) chaperonin CPN60-like 2, mitochondrial (A)	ko03018: RNA degradation	XP_013468844.1	NHL6_ARATH RecName: Full=NDR1/HIN1-like protein 6 {ECO:0000303|PubMed:26849212};	At1g54540	GO:0005829,cytosol; GO:0016021,integral component of membrane; GO:0005886,plasma membrane; GO:0009738,abscisic acid-activated signaling pathway; GO:0010116,positive regulation of abscisic acid biosynthetic process; GO:0009737,response to abscisic acid; GO:0006970,response to osmotic stress; GO:1902074,response to salt; GO:0001101,response to acid chemical; GO:0007165,signal transduction; GO:00071…	PF03168.13:Late embryogenesis abundant protein	--	--	--
MS.gene004970	1.16	46.98	32.24	211.54	258.81	231.72	48.93	181.09	52.34	274.08	171.19	204.7	7	317	239	1425	1666	1544	303	1208	331	1698	1172	1158	chr1.4	63799595	63800407	+	--	--	K01761 methionine-gamma-lyase [EC:4.4.1.11] | (GenBank) cystathionine beta-lyase/cystathionine gamma-synthase (A)	ko00270: Cysteine and methionine metabolism; ko00450: Selenocompound metabolism; ko01100: Metabolic pathways	XP_013468871.1	MGL_ARATH RecName: Full=Methionine gamma-lyase; Short=AtMGL; EC=4.4.1.11; AltName: Full=L-methioninase;	At1g64660	GO:0005737,cytoplasm; GO:0005829,cytosol; GO:0016846,carbon-sulfur lyase activity; GO:0004123,cystathionine gamma-lyase activity; GO:0018826,methionine gamma-lyase activity; GO:0030170,pyridoxal phosphate binding; GO:0009970,cellular response to sulfate starvation; GO:0042631,cellular response to water deprivation; GO:0019343,cysteine biosynthetic process via cystathionine; GO:0019458,methionine …	PF01053.20:Cys/Met metabolism PLP-dependent enzyme	--	--	--
MS.gene004971	0.99	4.22	3.03	32.23	25.59	29.89	6.77	17.73	5.21	87.24	6.78	16.41	4	19	15	145	110	133	28	79	22	361	31	62	chr1.4	63804958	63805500	+	--	--	K01761 methionine-gamma-lyase [EC:4.4.1.11] | (GenBank) cystathionine beta-lyase/cystathionine gamma-synthase (A)	ko00270: Cysteine and methionine metabolism; ko00450: Selenocompound metabolism; ko01100: Metabolic pathways	XP_013468871.1	MGL_ARATH RecName: Full=Methionine gamma-lyase; Short=AtMGL; EC=4.4.1.11; AltName: Full=L-methioninase;	At1g64660	GO:0005737,cytoplasm; GO:0005829,cytosol; GO:0016846,carbon-sulfur lyase activity; GO:0004123,cystathionine gamma-lyase activity; GO:0018826,methionine gamma-lyase activity; GO:0030170,pyridoxal phosphate binding; GO:0009970,cellular response to sulfate starvation; GO:0042631,cellular response to water deprivation; GO:0019343,cysteine biosynthetic process via cystathionine; GO:0019458,methionine …	PF01053.20:Cys/Met metabolism PLP-dependent enzyme	--	--	--
MS.gene004978	25.98	40.87	27.97	58.62	44.12	51.15	179.23	90.89	118.49	167.79	122.65	0.6	230	403	303	577	415	498	1622	886	1095	1519	1227	5	chr1.4	63881702	63885106	-	--	--	K01056 peptidyl-tRNA hydrolase, PTH1 family [EC:3.1.1.29] | (RefSeq) chloroplastic group IIB intron splicing facilitator CRS2, chloroplastic-like (A)	--	XP_013468879.1	--	At1g64720	GO:0016021,integral component of membrane; GO:0008289,lipid binding; GO:0003674,molecular_function; GO:0005488,binding; GO:0005575,cellular_component; GO:0016020,membrane; GO:0031224,intrinsic component of membrane; GO:0044425,membrane part	PF01852.19:START domain	--	--	--
MS.gene005012	17.75	23.84	10.49	17.26	17.25	15.74	56.18	44.69	66.63	47.41	65.38	54.55	123	184	89	133	127	120	398	341	482	336	512	353	chr1.3	56221816	56223490	-	--	--	K03188 urease accessory protein | (RefSeq) uncharacterized protein LOC108224146 isoform X1 (A)	--	XP_003590868.1	P2B12_ARATH RecName: Full=Putative F-box protein PP2-B12; AltName: Full=Protein PHLOEM PROTEIN 2-LIKE B12; Short=AtPP2-B12;	At5g24560	GO:0030246,carbohydrate binding; GO:0003674,molecular_function; GO:0005488,binding	PF14299.6:Phloem protein 2	--	--	--
MS.gene00508	0	0	0.16	6.32	5.15	0.18	0	0.35	0.75	6.11	0.17	0	0	0	1	36	28	1	0	2	4	32	1	0	chr1.2	5134649	5135335	+	--	--	K12855 pre-mRNA-processing factor 6 | (GenBank) pre-mRNA splicing factor-like protein (A)	ko03040: Spliceosome	XP_003588734.1	STA1_ARATH RecName: Full=Protein STABILIZED1; AltName: Full=Pre-mRNA processing factor 6-like protein; AltName: Full=Protein EMBRYO DEFECTIVE 2770;	At4g03430	GO:0015030,Cajal body; GO:0071013,catalytic step 2 spliceosome; GO:0005634,nucleus; GO:0005681,spliceosomal complex; GO:0046540,U4/U6 x U5 tri-snRNP complex; GO:0080188,RNA-directed DNA methylation; GO:0000398,mRNA splicing, via spliceosome; GO:2000630,positive regulation of miRNA metabolic process; GO:2000636,positive regulation of primary miRNA processing; GO:0009409,response to cold; GO:000984…	PF00240.23:Ubiquitin family	--	--	--
MS.gene005123	0	0	0	0	0	0	0	0	0	1.97	1.33	3.01	0	0	0	0	0	0	0	0	0	20	15	28	chr1.1	60039064	60041507	-	--	--	K10599 pre-mRNA-processing factor 19 [EC:2.3.2.27] | (GenBank) Pre-mRNA-processing factor (A)	ko03040: Spliceosome; ko04120: Ubiquitin mediated proteolysis	XP_003590221.2	PR19A_ARATH RecName: Full=Pre-mRNA-processing factor 19 homolog 1 {ECO:0000305}; EC=2.3.2.- {ECO:0000250|UniProtKB:O22785}; AltName: Full=MOS4-associated complex protein 3A; Short=MAC protein 3A; AltName: Full=Plant U-box protein 59; AltName: Full=U-box domain-containing protein 59;	At1g04510	GO:0071013,catalytic step 2 spliceosome; GO:0005576,extracellular region; GO:0005730,nucleolus; GO:0005634,nucleus; GO:0000974,Prp19 complex; GO:0071006,U2-type catalytic step 1 spliceosome; GO:0061630,ubiquitin protein ligase activity; GO:0004842,ubiquitin-protein transferase activity; GO:0042742,defense response to bacterium; GO:0006281,DNA repair; GO:0000349,generation of catalytic spliceosome…	PF10536.9:Plant mobile domain	--	--	--
MS.gene005137	0.32	1.14	1.56	25.11	5.67	10.38	0.31	9.51	0.91	2.17	2.81	8.83	1	4	6	88	19	36	1	33	3	7	10	26	chr1.1	60195422	60195976	-	--	--	K03116 sec-independent protein translocase protein TatA | (GenBank) twin arginine translocase (A)	ko03060: Protein export	GAU21457.1	TATA_PEA RecName: Full=Sec-independent protein translocase protein TATA, chloroplastic; AltName: Full=Protein THYLAKOID ASSEMBLY 4; AltName: Full=Protein TWIN-ARGININE TRANSLOCATION A; Flags: Precursor;	At5g28750	GO:0009535,chloroplast thylakoid membrane; GO:0031361,integral component of thylakoid membrane; GO:0033281,TAT protein transport complex; GO:0009977,proton motive force dependent protein transmembrane transporter activity; GO:0045038,protein import into chloroplast thylakoid membrane; GO:0043953,protein transport by the Tat complex; GO:0003674,molecular_function; GO:0005215,transporter activity; …	PF02416.16:mttA/Hcf106 family	--	--	--
MS.gene005152	216.51	143.19	216.15	227.09	93.66	57.77	61.52	35.33	27.95	52.62	142.28	466.55	668	492	816	779	307	196	194	120	90	166	496	1344	chr1.1	60421782	60423583	+	--	--	K02974 small subunit ribosomal protein S24e | (GenBank) 40S ribosomal protein S24-2 (A)	ko03010: Ribosome	XP_003591024.1	RS241_ARATH RecName: Full=40S ribosomal protein S24-1;	At3g04920	GO:0009507,chloroplast; GO:0005829,cytosol; GO:0022626,cytosolic ribosome; GO:0022627,cytosolic small ribosomal subunit; GO:0005730,nucleolus; GO:0005886,plasma membrane; GO:0042788,polysomal ribosome; GO:0005774,vacuolar membrane; GO:0003729,mRNA binding; GO:0003735,structural constituent of ribosome; GO:0006412,translation; GO:0003674,molecular_function; GO:0003676,nucleic acid binding; GO:0003…	PF01282.19:Ribosomal protein S24e	--	--	--
MS.gene005155	47.3	56.69	27.28	40.23	60.43	3.5	11.1	2.72	1.64	19.46	24.05	0	221	295	156	209	300	18	53	14	8	93	127	0	chr1.1	60441446	60442771	+	--	--	K12951 cobalt/nickel-transporting P-type ATPase D [EC:7.2.2.-] | (RefSeq) hypothetical protein (A)	--	XP_003591029.2	GSDA_ARATH RecName: Full=Guanosine deaminase {ECO:0000303|PubMed:24130159}; EC=3.5.4.15 {ECO:0000269|PubMed:24130159}; AltName: Full=tRNA-specific adenosine deaminase TAD4 {ECO:0000303|PubMed:25315605}; Short=AtTAD4 {ECO:0000303|PubMed:25315605};	At5g28050	GO:0005737,cytoplasm; GO:0005634,nucleus; GO:0047974,guanosine deaminase activity; GO:0008270,zinc ion binding; GO:0006152,purine nucleoside catabolic process; GO:0003674,molecular_function; GO:0003824,catalytic activity; GO:0016787,hydrolase activity; GO:0016810,hydrolase activity, acting on carbon-nitrogen (but not peptide) bonds; GO:0016814,hydrolase activity, acting on carbon-nitrogen (but no…	PF00383.23:Cytidine and deoxycytidylate deaminase zinc-binding region	--	--	--
MS.gene005199	9.3	22.49	63.95	6.76	60.06	18	0.58	2.27	6.74	8.4	6.33	10.48	78	210	656	63	535	166	5	21	59	72	60	82	chr1.4	66638404	66643235	+	--	--	K01206 alpha-L-fucosidase [EC:3.2.1.51] | (RefSeq) alpha-L-fucosidase 3 (A)	ko00511: Other glycan degradation	XP_012570001.1	GDL22_ARATH RecName: Full=GDSL esterase/lipase At1g54790; EC=3.1.1.-; AltName: Full=Extracellular lipase At1g54790; Flags: Precursor;	At1g54790	GO:0005576,extracellular region; GO:0016788,hydrolase activity, acting on ester bonds; GO:0016042,lipid catabolic process; GO:0003674,molecular_function; GO:0003824,catalytic activity; GO:0016787,hydrolase activity; GO:0008152,metabolic process; GO:0006629,lipid metabolic process; GO:0008150,biological_process; GO:0009056,catabolic process; GO:0044238,primary metabolic process; GO:0071704,organic…	PF00657.22:GDSL-like Lipase/Acylhydrolase	--	--	--
MS.gene005226	0.2	0.27	0.69	6.25	2.46	10.85	3.14	0.63	11.24	3.71	5.32	0	4	6	17	141	53	242	65	14	238	77	122	0	chr1.4	67025586	67030838	+	--	--	--	--	XP_003591102.1	--	At1g54920	--	--	--	--	--
MS.gene005253	0.05	0	0	0	0.09	0.05	0.25	0.82	3.57	5.41	1.25	20.91	1	0	0	0	2	1	5	18	74	110	28	388	chr1.4	67361780	67368981	+	--	--	K13447 respiratory burst oxidase [EC:1.6.3.- 1.11.1.-] | (GenBank) respiratory burst oxidase-like protein (A)	ko04016: MAPK signaling pathway - plant; ko04626: Plant-pathogen interaction	XP_003591142.1	RBOHB_SOLTU RecName: Full=Respiratory burst oxidase homolog protein B; EC=1.11.1.-; EC=1.6.3.-; AltName: Full=NADPH oxidase RBOHB; AltName: Full=StRBOHB;	At1g09090	GO:0016021,integral component of membrane; GO:0005886,plasma membrane; GO:0005509,calcium ion binding; GO:0016174,NAD(P)H oxidase activity; GO:0004601,peroxidase activity; GO:0003674,molecular_function; GO:0005488,binding; GO:0046872,metal ion binding; GO:0043167,ion binding; GO:0043169,cation binding; GO:0003824,catalytic activity; GO:0016491,oxidoreductase activity; GO:0016651,oxidoreductase ac…	PF08030.12:Ferric reductase NAD binding domain	--	--	--
MS.gene005268	0	20.31	4.93	4.97	18.45	15.08	54.08	133.74	14.93	31.46	164.12	230.37	0	45	12	11	39	33	110	293	31	64	369	428	chr1.1	61789968	61792103	+	--	--	--	--	XP_003591157.1	--	At3g05550	GO:0031305,integral component of mitochondrial inner membrane; GO:0005746,mitochondrial respiratory chain; GO:0033617,mitochondrial respiratory chain complex IV assembly; GO:0006996,organelle organization; GO:0007005,mitochondrion organization; GO:0008150,biological_process; GO:0008535,respiratory chain complex IV assembly; GO:0009987,cellular process; GO:0022607,cellular component assembly; GO:0…	PF04588.13:Hypoxia induced protein conserved region	--	--	--
MS.gene005286	0.18	0.49	0.15	0	0.34	0.16	3.54	0.82	0	0.53	10.74	24.44	1	3	1	0	2	1	20	5	0	3	67	126	chr1.1	61997012	61998613	+	--	--	K12849 pre-mRNA-splicing factor 38A | (GenBank) pre-mRNA-splicing factor (A)	ko03040: Spliceosome	XP_003591188.1	PRP38_ARATH RecName: Full=Pre-mRNA-splicing factor 38;	At2g40650	GO:0071011,precatalytic spliceosome; GO:0006397,mRNA processing; GO:0008380,RNA splicing; GO:0008152,metabolic process; GO:0006139,nucleobase-containing compound metabolic process; GO:0006396,RNA processing; GO:0006725,cellular aromatic compound metabolic process; GO:0006807,nitrogen compound metabolic process; GO:0008150,biological_process; GO:0009987,cellular process; GO:0010467,gene expression…	PF03371.15:PRP38 family	--	--	--
MS.gene005294	0.25	0.33	0	0.66	4.41	0.34	3.01	1.34	4.49	0.12	3.38	2.38	2	3	0	6	38	3	25	12	38	1	31	18	chr1.1	62103068	62108507	+	--	--	K09122 uncharacterized protein | (RefSeq) unknown ribonuclease (A)	--	AFK39265.1	WEX_ARATH RecName: Full=Werner Syndrome-like exonuclease; EC=3.1.-.-;	At1g56310	GO:0005737,cytoplasm; GO:0005634,nucleus; GO:0008408,3'-5' exonuclease activity; GO:0003677,DNA binding; GO:0046872,metal ion binding; GO:0003674,molecular_function; GO:0003824,catalytic activity; GO:0004518,nuclease activity; GO:0004527,exonuclease activity; GO:0016787,hydrolase activity; GO:0016788,hydrolase activity, acting on ester bonds; GO:0003676,nucleic acid binding; GO:0005488,binding; G…	PF01612.20:3'-5' exonuclease	--	--	--
MS.gene005302	3.36	20.48	1.63	8.2	0.15	0	1.49	1.38	1.23	1.02	0	0	42	285	25	114	2	0	19	19	16	13	0	0	chr1.1	62174671	62177818	-	--	--	K07466 replication factor A1 | (GenBank) replication factor-A carboxy-terminal domain protein (A)	ko03030: DNA replication; ko03420: Nucleotide excision repair; ko03430: Mismatch repair; ko03440: Homologous recombination	XP_003616287.1	RFA1B_ORYSJ RecName: Full=Replication protein A 70 kDa DNA-binding subunit B; Short=OsRPA70b; AltName: Full=Replication factor A protein 1B; AltName: Full=Replication protein A 1B;	At1g52950	GO:0005662,DNA replication factor A complex; GO:0003684,damaged DNA binding; GO:0046872,metal ion binding; GO:0043047,single-stranded telomeric DNA binding; GO:0006268,DNA unwinding involved in DNA replication; GO:0000724,double-strand break repair via homologous recombination; GO:0051321,meiotic cell cycle; GO:0006289,nucleotide-excision repair; GO:0007004,telomere maintenance via telomerase; GO…	PF02721.14:Domain of unknown function DUF223	--	--	--
MS.gene005306	4.31	1.21	0.44	0.24	1.78	1.47	6.85	29.86	15.49	57.45	262.78	142.85	16	5	2	1	7	6	26	122	60	218	1102	495	chr1.1	62206178	62207006	+	--	--	K06674 structural maintenance of chromosome 2 | (RefSeq) hypothetical protein (A)	--	XP_003591211.1	USPAL_ARATH RecName: Full=Universal stress protein A-like protein;	At3g62550	GO:0005829,cytosol; GO:0005886,plasma membrane; GO:0016208,AMP binding; GO:0000166,nucleotide binding; GO:0003674,molecular_function; GO:0005488,binding; GO:0008144,drug binding; GO:0017076,purine nucleotide binding; GO:0030554,adenyl nucleotide binding; GO:0032553,ribonucleotide binding; GO:0032555,purine ribonucleotide binding; GO:0032559,adenyl ribonucleotide binding; GO:0036094,small molecule…	PF00582.26:Universal stress protein family	--	--	--
MS.gene005331	6.21	4.31	3.46	1.4	1.86	1.67	1.24	0.64	0.54	1.1	3	5.59	44	34	30	11	14	13	9	5	4	8	24	37	chr1.1	62533801	62536355	-	--	--	K08486 syntaxin 1B/2/3 | (RefSeq) uncharacterized protein LOC113306450 (A)	ko04130: SNARE interactions in vesicular transport	GAU21547.1	AGDP1_ARATH RecName: Full=Protein AGENET DOMAIN (AGD)-CONTAINING P1 {ECO:0000303|PubMed:30382101}; AltName: Full=Protein ONE AGENET DOMAIN-CONTAINING PROTEIN {ECO:0000303|PubMed:30425322};	At1g09320	GO:0000775,chromosome, centromeric region; GO:0000792,heterochromatin; GO:0005634,nucleus; GO:0042393,histone binding; GO:0035064,methylated histone binding; GO:0006346,methylation-dependent chromatin silencing; GO:0036123,histone H3-K9 dimethylation; GO:0044030,regulation of DNA methylation; GO:0005515,protein binding; GO:0003674,molecular_function; GO:0005488,binding; GO:0140030,modification-de…	PF05641.12:Agenet domain	--	--	--
MS.gene005336	33.48	38.31	2.13	0.49	3.49	2.5	7.92	32.52	3.68	2.68	18.21	25.27	244	311	19	4	27	20	59	261	28	20	150	172	chr1.1	62585578	62587188	+	--	--	K18819 inositol 3-alpha-galactosyltransferase [EC:2.4.1.123] | (GenBank) galactinol synthase (A)	ko00052: Galactose metabolism; ko01100: Metabolic pathways	AAM97493.1	GOLS2_SOLLC RecName: Full=Galactinol synthase 2; Short=GolS-2; Short=SlGolS2; EC=2.4.1.123;	At1g56600	GO:0005737,cytoplasm; GO:0047216,inositol 3-alpha-galactosyltransferase activity; GO:0046872,metal ion binding; GO:0016757,transferase activity, transferring glycosyl groups; GO:0006012,galactose metabolic process; GO:0003674,molecular_function; GO:0003824,catalytic activity; GO:0008194,UDP-glycosyltransferase activity; GO:0008378,galactosyltransferase activity; GO:0016740,transferase activity; G…	PF01501.20:Glycosyl transferase family 8	--	--	--
MS.gene005376	5.47	7.25	4.6	0.07	2.24	0.21	4.47	2.54	0.9	1.73	8.92	49.36	145	214	149	2	63	6	121	74	25	47	267	1221	chr1.1	62969749	62974687	-	--	--	--	--	XP_003591256.1	--	At3g05900	--	--	--	--	--
MS.gene005411	2.31	9.23	2.42	3.47	49.48	60.77	8.68	38.17	16.25	25.14	41.52	39.92	18	80	23	30	409	520	69	327	132	200	365	290	chr1.1	63420598	63422271	-	--	--	K20660 cytochrome P450 family 709 | (GenBank) cytochrome P450 family 709 protein (A)	--	XP_013469137.1	C70B2_ARATH RecName: Full=Cytochrome P450 709B2 {ECO:0000305}; EC=1.14.-.- {ECO:0000305};	At2g46950	GO:0005829,cytosol; GO:0016021,integral component of membrane; GO:0020037,heme binding; GO:0005506,iron ion binding; GO:0004497,monooxygenase activity; GO:0016705,oxidoreductase activity, acting on paired donors, with incorporation or reduction of molecular oxygen; GO:0003674,molecular_function; GO:0005488,binding; GO:0046906,tetrapyrrole binding; GO:0048037,cofactor binding; GO:0097159,organic c…	PF00067.22:Cytochrome P450	--	--	--
MS.gene005430	17.36	19.72	13	53.72	54.43	58.13	26.13	37.7	47.23	76.75	44.21	68.09	501	634	459	1724	1669	1845	771	1198	1423	2265	1442	1835	chr1.1	63690786	63696779	-	--	--	K05658 ATP-binding cassette, subfamily B (MDR/TAP), member 1 [EC:7.6.2.2] | (GenBank) ABC transporter B family protein (A)	ko02010: ABC transporters	XP_003591310.1	AB4B_ARATH RecName: Full=ABC transporter B family member 4; Short=ABC transporter ABCB.4; Short=AtABCB4; AltName: Full=Multidrug resistance protein 4; AltName: Full=P-glycoprotein 4;	At2g47000	GO:0005829,cytosol; GO:0016021,integral component of membrane; GO:0016020,membrane; GO:0005886,plasma membrane; GO:0009506,plasmodesma; GO:0008559,xenobiotic transmembrane transporting ATPase activity; GO:0005524,ATP binding; GO:0042626,ATPase activity, coupled to transmembrane movement of substances; GO:0010329,auxin efflux transmembrane transporter activity; GO:0010328,auxin influx transmembran…	PF00664.23:ABC transporter transmembrane region	--	--	--
MS.gene005432	0	0.13	0	0.63	4.72	4.18	0	0.25	0.13	0.14	3.08	0	0	1	0	5	36	33	0	2	1	1	25	0	chr1.1	63714312	63719690	+	--	--	K09838 zeaxanthin epoxidase [EC:1.14.15.21] | (GenBank) zeaxanthin epoxidase (A)	ko00906: Carotenoid biosynthesis; ko01100: Metabolic pathways; ko01110: Biosynthesis of secondary metabolites	XP_013450170.1	TAUE4_ARATH RecName: Full=Sulfite exporter TauE/SafE family protein 4 {ECO:0000312|EMBL:AEC09275.1};	At5g67030	GO:0031464,Cul4A-RING E3 ubiquitin ligase complex; GO:0016021,integral component of membrane; GO:0016567,protein ubiquitination; GO:0008152,metabolic process; GO:0006464,cellular protein modification process; GO:0006807,nitrogen compound metabolic process; GO:0008150,biological_process; GO:0009987,cellular process; GO:0019538,protein metabolic process; GO:0032446,protein modification by small pro…	--	--	--	--
MS.gene005437	8.33	12.47	4.54	3.25	18.83	11.87	48.38	19.18	35.67	48.36	60.73	0.3	30	50	20	13	72	47	178	76	134	178	247	1	chr1.1	63758051	63759629	-	--	--	--	--	PNY11248.1	--	At3g22220	GO:0005634,nucleus; GO:0003677,DNA binding; GO:0046872,metal ion binding; GO:0046983,protein dimerization activity; GO:0003674,molecular_function; GO:0003676,nucleic acid binding; GO:0005488,binding; GO:0097159,organic cyclic compound binding; GO:1901363,heterocyclic compound binding; GO:0043167,ion binding; GO:0043169,cation binding; GO:0005515,protein binding; GO:0005622,intracellular; GO:00055…	--	--	--	--
MS.gene005458	0	0	0	0.27	0.09	0	0.88	1.18	0.38	6.87	0.89	0	0	0	0	3	1	0	9	13	4	70	10	0	chr1.1	63922227	63928065	-	--	--	K23280 rhamnogalacturonan I rhamnosyltransferase [EC:2.4.1.351] | (GenBank) O-fucosyltransferase family protein (A)	--	XP_003613885.1	RRT4_ARATH RecName: Full=Rhamnogalacturonan I rhamnosyltransferase 1 {ECO:0000303|PubMed:30082766}; EC=2.4.1.351 {ECO:0000269|PubMed:30082766}; AltName: Full=O-fucosyltransferase 3 {ECO:0000305}; Short=O-FucT-3 {ECO:0000305}; AltName: Full=O-fucosyltransferase family protein {ECO:0000305};	At1g14020	GO:0009507,chloroplast; GO:0005737,cytoplasm; GO:0000139,Golgi membrane; GO:0016021,integral component of membrane; GO:0016757,transferase activity, transferring glycosyl groups; GO:0071555,cell wall organization; GO:0006004,fucose metabolic process; GO:0045489,pectin biosynthetic process; GO:0003674,molecular_function; GO:0003824,catalytic activity; GO:0016740,transferase activity; GO:0008150,bi…	PF10250.9:GDP-fucose protein O-fucosyltransferase	--	--	--
MS.gene005461	0	0	0	2.87	1.64	2.38	0	0	0	0	1.03	0	0	0	0	11	6	9	0	0	0	0	4	0	chr1.1	63936382	63939264	-	--	--	--	--	XP_003603652.2	--	--	GO:0016787,hydrolase activity; GO:0044255,cellular lipid metabolic process; GO:0003674,molecular_function; GO:0003824,catalytic activity; GO:0008152,metabolic process; GO:0006629,lipid metabolic process; GO:0008150,biological_process; GO:0009987,cellular process; GO:0044237,cellular metabolic process; GO:0044238,primary metabolic process; GO:0071704,organic substance metabolic process	PF05057.14:Putative serine esterase (DUF676)	--	--	--
MS.gene005482	2.54	5.98	7.12	0.44	0.37	1.07	13.69	24.09	2.53	0.57	1.21	9.96	26	68	89	5	4	12	143	271	27	6	14	95	chr1.1	64162343	64165485	+	--	--	K01213 galacturan 1,4-alpha-galacturonidase [EC:3.2.1.67] | (RefSeq) polygalacturonase At1g48100-like (A)	ko00040: Pentose and glucuronate interconversions; ko01100: Metabolic pathways	XP_003591344.2	PGLR4_ARATH RecName: Full=Polygalacturonase At1g48100; Short=PG; EC=3.2.1.15; AltName: Full=Pectinase At1g48100; Flags: Precursor;	At1g02460	GO:0005618,cell wall; GO:0005576,extracellular region; GO:0004650,polygalacturonase activity; GO:0005975,carbohydrate metabolic process; GO:0009831,plant-type cell wall modification involved in multidimensional cell growth; GO:0003674,molecular_function; GO:0003824,catalytic activity; GO:0004553,hydrolase activity, hydrolyzing O-glycosyl compounds; GO:0016787,hydrolase activity; GO:0016798,hydrol…	PF00295.17:Glycosyl hydrolases family 28	--	--	--
MS.gene005488	7.77	11.63	1.55	7.77	1.46	2.51	17.23	22.12	8.44	34.96	40.35	137.43	45	75	11	50	9	16	102	141	51	207	264	743	chr1.1	64237384	64238519	+	--	--	K09422 transcription factor MYB, plant | (GenBank) myb transcription factor (A)	--	XP_003591357.1	MYB2_ORYSJ RecName: Full=Transcription factor MYB2 {ECO:0000305}; AltName: Full=Myb-related protein 2 {ECO:0000305}; Short=OsMYB2 {ECO:0000303|PubMed:22301384};	At1g48000	GO:0005634,nucleus; GO:0003700,DNA-binding transcription factor activity; GO:0043565,sequence-specific DNA binding; GO:1901002,positive regulation of response to salt stress; GO:1902584,positive regulation of response to water deprivation; GO:0045893,positive regulation of transcription, DNA-templated; GO:0006355,regulation of transcription, DNA-templated; GO:0009409,response to cold; GO:0140110,…	PF00249.31:Myb-like DNA-binding domain	MYB	TF	MYB->MYB
MS.gene005489	0.8	0.43	0	0.43	0	0	2.82	4.66	4.45	2.67	10.64	8.07	5	3	0	3	0	0	18	32	29	17	75	47	chr1.1	64250160	64251293	+	--	--	K09422 transcription factor MYB, plant | (GenBank) myb transcription factor (A)	--	AHY94990.1	MY108_ARATH RecName: Full=Transcription factor MYB108; AltName: Full=Myb-related protein 108; Short=AtMYB108; AltName: Full=Protein BOTRYTIS-SUSCEPTIBLE 1;	At3g06490	GO:0005634,nucleus; GO:0003700,DNA-binding transcription factor activity; GO:0043565,sequence-specific DNA binding; GO:0000976,transcription regulatory region sequence-specific DNA binding; GO:0006952,defense response; GO:0120195,NA; GO:0006355,regulation of transcription, DNA-templated; GO:0009620,response to fungus; GO:0140110,transcription regulator activity; GO:0003674,molecular_function; GO:…	PF00249.31:Myb-like DNA-binding domain	MYB	TF	MYB->MYB
MS.gene005525	0	0	0	0.51	0	0	51.46	59.53	106.99	17.06	9.71	21.69	0	0	0	2	0	0	187	233	397	62	39	72	chr1.1	64626684	64627988	+	--	--	--	--	XP_003591417.1	PHO32_ARATH RecName: Full=Universal stress protein PHOS32 {ECO:0000303|PubMed:12644671}; AltName: Full=Phosphorylated protein of 32 kDa {ECO:0000303|PubMed:18285339}; Short=AtPHOS32 {ECO:0000303|PubMed:18285339}; Flags: Precursor;	At3g62550	GO:0009507,chloroplast; GO:0005829,cytosol; GO:0005634,nucleus; GO:0005886,plasma membrane; GO:0009536,plastid; GO:0005524,ATP binding; GO:0002238,response to molecule of fungal origin; GO:0000166,nucleotide binding; GO:0003674,molecular_function; GO:0005488,binding; GO:0008144,drug binding; GO:0017076,purine nucleotide binding; GO:0030554,adenyl nucleotide binding; GO:0032553,ribonucleotide bind…	PF00582.26:Universal stress protein family	--	--	--
MS.gene005526	4.63	5.62	2.46	2.5	1.96	2.95	4.08	8.21	1.33	28.78	31.38	75.7	20	27	13	12	9	14	18	39	6	127	153	305	chr1.1	64635740	64636318	+	--	--	--	--	XP_003591419.1	--	At4g02090	--	PF14009.6:Domain of unknown function (DUF4228)	--	--	--
MS.gene005527	2.1	2.4	1.97	1.54	1.67	0.98	0.56	0.35	0.12	0.43	1.41	0.07	33	42	38	27	28	17	9	6	2	7	25	1	chr1.1	64639920	64643244	+	--	--	K15920 xylan 1,4-beta-xylosidase [EC:3.2.1.37] | (RefSeq) beta-xylosidase/alpha-L-arabinofuranosidase 2 (A)	ko00520: Amino sugar and nucleotide sugar metabolism; ko01100: Metabolic pathways	XP_003591420.1	BXL2_ARATH RecName: Full=Probable beta-D-xylosidase 2; Short=AtBXL2; EC=3.2.1.-; Flags: Precursor;	At1g02640	GO:0005576,extracellular region; GO:0009505,plant-type cell wall; GO:0046556,alpha-L-arabinofuranosidase activity; GO:0009044,xylan 1,4-beta-xylosidase activity; GO:0031222,arabinan catabolic process; GO:0045493,xylan catabolic process; GO:0003674,molecular_function; GO:0003824,catalytic activity; GO:0004553,hydrolase activity, hydrolyzing O-glycosyl compounds; GO:0016787,hydrolase activity; GO:0…	PF01915.22:Glycosyl hydrolase family 3 C-terminal domain	--	--	--
MS.gene005560	12.16	9.04	7.77	3.39	7.63	5.97	39.38	288.05	214.93	449.05	575.09	1146.72	87	72	68	27	58	47	288	2269	1605	3285	4649	7660	chr1.1	64922003	64923099	+	--	--	K09286 EREBP-like factor | (GenBank) ethylene response factor (A)	--	XP_003591474.1	RAP23_ARATH RecName: Full=Ethylene-responsive transcription factor RAP2-3; AltName: Full=Cadmium-induced protein AS30; AltName: Full=Ethylene response factor 72; Short=ERF72; AltName: Full=Ethylene-responsive element binding protein; Short=AtEBP; AltName: Full=Protein RELATED TO APETALA2 3; Short=Related to AP2 3;	At3g16770	GO:0005737,cytoplasm; GO:0005634,nucleus; GO:0005886,plasma membrane; GO:0003677,DNA binding; GO:0003700,DNA-binding transcription factor activity; GO:0000976,transcription regulatory region sequence-specific DNA binding; GO:0008219,cell death; GO:0009873,ethylene-activated signaling pathway; GO:0010286,heat acclimation; GO:0045893,positive regulation of transcription, DNA-templated; GO:0009735,r…	PF00847.20:AP2 domain	AP2/ERF-ERF	TF	AP2/ERF->AP2/ERF-ERF
MS.gene005602	32.17	89.95	44.46	316.66	155.35	146.28	397.15	1274.09	1534.64	675.33	1221.34	408.17	123	383	208	1346	631	615	1552	5363	6124	2640	5276	1457	8681	116801	118589	-	--	--	--	--	XP_003591541.1	PHO34_ARATH RecName: Full=Universal stress protein PHOS34 {ECO:0000303|PubMed:12644671}; AltName: Full=Phosphorylated protein of 34 kDa {ECO:0000303|PubMed:18285339}; Short=AtPHOS34 {ECO:0000303|PubMed:18285339}; Flags: Precursor;	At2g47710	GO:0009507,chloroplast; GO:0005829,cytosol; GO:0005524,ATP binding; GO:0002238,response to molecule of fungal origin; GO:0000166,nucleotide binding; GO:0003674,molecular_function; GO:0005488,binding; GO:0008144,drug binding; GO:0017076,purine nucleotide binding; GO:0030554,adenyl nucleotide binding; GO:0032553,ribonucleotide binding; GO:0032555,purine ribonucleotide binding; GO:0032559,adenyl rib…	PF00582.26:Universal stress protein family	--	--	--
MS.gene005606	5.28	4.19	2.89	14.73	24.42	8.66	6.33	1.14	7.09	4.88	7.38	4.14	164	145	110	509	806	296	201	39	230	155	259	120	8681	157000	163302	-	--	--	K05666 ATP-binding cassette, subfamily C (CFTR/MRP), member 2 | (RefSeq) ABC transporter C family member 14-like (A)	ko02010: ABC transporters	XP_003591546.1	AB14C_ARATH RecName: Full=ABC transporter C family member 14; Short=ABC transporter ABCC.14; Short=AtABCC14; EC=7.6.2.2; AltName: Full=ATP-energized glutathione S-conjugate pump 10; AltName: Full=Glutathione S-conjugate-transporting ATPase 10; AltName: Full=Multidrug resistance-associated protein 10;	At3g62700	GO:0005829,cytosol; GO:0005794,Golgi apparatus; GO:0016021,integral component of membrane; GO:0016020,membrane; GO:0000325,plant-type vacuole; GO:0005774,vacuolar membrane; GO:0005773,vacuole; GO:0008559,xenobiotic transmembrane transporting ATPase activity; GO:0005524,ATP binding; GO:0042626,ATPase activity, coupled to transmembrane movement of substances; GO:0055085,transmembrane transport; GO:…	PF00005.27:ABC transporter	--	--	--
MS.gene005619	510.73	216.5	67.33	1853.16	1119.06	891.75	177.27	55.74	399.22	279.75	374.67	318.4	2455	1159	396	9904	5715	4714	871	295	2003	1375	2035	1429	8682	60308	61357	-	--	--	K00799 glutathione S-transferase [EC:2.5.1.18] | (GenBank) glutathione S-transferase, amino-terminal domain protein (A)	ko00480: Glutathione metabolism; ko01100: Metabolic pathways	XP_013469188.1	GSTF_HYOMU RecName: Full=Glutathione S-transferase {ECO:0000303|PubMed:8108497}; EC=2.5.1.18 {ECO:0000269|PubMed:8108497}; AltName: Full=25 kDa auxin-binding protein {ECO:0000303|PubMed:8108497}; AltName: Full=GST class-phi {ECO:0000303|PubMed:8108497};	At1g02920	GO:0004364,glutathione transferase activity; GO:0009734,auxin-activated signaling pathway; GO:0006749,glutathione metabolic process; GO:0003674,molecular_function; GO:0003824,catalytic activity; GO:0016740,transferase activity; GO:0016765,transferase activity, transferring alkyl or aryl (other than methyl) groups; GO:0007165,signal transduction; GO:0007154,cell communication; GO:0008150,biologica…	PF02798.20:Glutathione S-transferase, N-terminal domain	--	--	--
MS.gene005620	0.62	2.99	49.65	197.03	623.07	44.46	1.42	1.89	4.98	459.61	13.62	7.58	3	16	292	1053	3182	235	7	10	25	2259	74	34	8682	64839	65777	-	--	--	K00799 glutathione S-transferase [EC:2.5.1.18] | (GenBank) glutathione S-transferase, amino-terminal domain protein (A)	ko00480: Glutathione metabolism; ko01100: Metabolic pathways	BAB70616.1	GSTF1_TOBAC RecName: Full=Glutathione S-transferase PARB {ECO:0000303|PubMed:1729717}; EC=2.5.1.18 {ECO:0000250|UniProtKB:O80852}; AltName: Full=GST class-phi {ECO:0000303|PubMed:1729717};	At1g02920	GO:0005737,cytoplasm; GO:0043295,glutathione binding; GO:0004364,glutathione transferase activity; GO:0006749,glutathione metabolic process; GO:0003674,molecular_function; GO:0005488,binding; GO:0033218,amide binding; GO:0042277,peptide binding; GO:0043167,ion binding; GO:0043168,anion binding; GO:0048037,cofactor binding; GO:0072341,modified amino acid binding; GO:1900750,oligopeptide binding; G…	PF02798.20:Glutathione S-transferase, N-terminal domain	--	--	--
MS.gene005636	5.08	2.75	1.88	0.26	0.9	2.61	3.19	0.35	0.09	11.15	8.22	18.46	53	32	24	3	10	30	34	4	1	119	97	180	8683	30339	33227	-	--	--	--	--	XP_013459511.1	--	--	--	PF00646.33:F-box domain	--	--	--
MS.gene005657	14.39	2.1	2.12	1.28	2.68	1.3	0.76	0.82	0.75	0.63	12.97	0	111	18	20	11	22	11	6	7	6	5	113	0	chr1.2	67063260	67065013	+	--	--	K14493 gibberellin receptor GID1 [EC:3.-.-.-] | (GenBank) gibberellin receptor GID1c-like protein (A)	ko04075: Plant hormone signal transduction	XP_003591590.1	GID1B_ARATH RecName: Full=Gibberellin receptor GID1B; EC=3.-.-.-; AltName: Full=AtCXE14; AltName: Full=Carboxylesterase 14; AltName: Full=GID1-like protein 2; AltName: Full=Protein GA INSENSITIVE DWARF 1B; Short=AtGID1B;	At3g63010	GO:0005737,cytoplasm; GO:0005634,nucleus; GO:0010331,gibberellin binding; GO:0016787,hydrolase activity; GO:0048444,floral organ morphogenesis; GO:0048530,fruit morphogenesis; GO:0010476,gibberellin mediated signaling pathway; GO:0010629,negative regulation of gene expression; GO:1905516,positive regulation of fertilization; GO:0009939,positive regulation of gibberellic acid mediated signaling pa…	PF07859.13:alpha/beta hydrolase fold	--	--	--
MS.gene005673	33.18	18.47	15.46	15.27	7.49	11.82	8.45	3.26	2.97	3.89	9.87	36.68	342	212	195	175	82	134	89	37	32	41	115	353	chr1.2	67278593	67279975	+	--	--	--	--	XP_003591620.1	--	At1g03350	--	PF03909.17:BSD domain	--	--	--
MS.gene005674	34.71	24.31	39.95	12.14	19.81	25.31	11.38	9.64	4.8	5.89	7.89	3	409	319	576	159	248	328	137	125	59	71	105	33	chr1.2	67282092	67286500	-	--	--	K10767 mRNA N6-methyladenine demethylase [EC:1.14.11.53] | (GenBank) 2OG-Fe(II) oxygenase family oxidoreductase (A)	--	XP_013469250.1	AK10B_ARATH RecName: Full=RNA demethylase ALKBH10B {ECO:0000305}; EC=1.14.11.- {ECO:0000269|PubMed:29180595}; AltName: Full=Alkylated DNA repair protein alkB homolog 10B {ECO:0000305}; AltName: Full=Alpha-ketoglutarate-dependent dioxygenase alkB homolog 10B {ECO:0000305};	At4g02940	GO:0032451,demethylase activity; GO:0051213,dioxygenase activity; GO:0046872,metal ion binding; GO:0003729,mRNA binding; GO:1990931,RNA N6-methyladenosine dioxygenase activity; GO:0006402,mRNA catabolic process; GO:0080167,response to karrikin; GO:0010228,vegetative to reproductive phase transition of meristem; GO:0003674,molecular_function; GO:0003824,catalytic activity; GO:0016491,oxidoreductas…	PF03171.20:2OG-Fe(II) oxygenase superfamily	--	--	--
MS.gene00569	6.25	8.37	4.14	29.89	8.95	35.9	13.2	7.15	12.06	21.43	15.63	6.59	69	103	56	367	105	436	149	87	139	242	195	68	chr1.4	5816024	5820455	-	--	--	K01369 legumain [EC:3.4.22.34] | (GenBank) vacuolar processing enzyme (A)	--	XP_013465905.1	VPE_VICSA RecName: Full=Vacuolar-processing enzyme; Short=VPE; EC=3.4.22.-; AltName: Full=Proteinase B; Flags: Precursor;	At4g32940	GO:0004197,cysteine-type endopeptidase activity; GO:0051603,proteolysis involved in cellular protein catabolic process; GO:0003674,molecular_function; GO:0003824,catalytic activity; GO:0004175,endopeptidase activity; GO:0008234,cysteine-type peptidase activity; GO:0008233,peptidase activity; GO:0070011,peptidase activity, acting on L-amino acid peptides; GO:0016787,hydrolase activity; GO:0140096,…	PF01650.18:Peptidase C13 family	--	--	--
MS.gene005690	29.49	12.44	13.26	50.38	50.48	110.86	60.6	130.14	94.61	149.04	60.08	54.69	149	70	82	283	271	616	313	724	499	770	343	258	chr1.2	67413219	67414570	-	--	--	K00799 glutathione S-transferase [EC:2.5.1.18] | (GenBank) glutathione S-transferase, amino-terminal domain protein (A)	ko00480: Glutathione metabolism; ko01100: Metabolic pathways	XP_003591636.2	GSTX3_TOBAC RecName: Full=Probable glutathione S-transferase; EC=2.5.1.18; AltName: Full=Auxin-induced protein PCNT103;	At2g29460	GO:0005737,cytoplasm; GO:0004364,glutathione transferase activity; GO:0009734,auxin-activated signaling pathway; GO:0006749,glutathione metabolic process; GO:0003674,molecular_function; GO:0003824,catalytic activity; GO:0016740,transferase activity; GO:0016765,transferase activity, transferring alkyl or aryl (other than methyl) groups; GO:0007165,signal transduction; GO:0007154,cell communication…	PF02798.20:Glutathione S-transferase, N-terminal domain	--	--	--
MS.gene005838	68.39	84.4	88.74	21.28	4.58	4.42	8.24	7.95	20.8	11.41	32.99	64.22	211	290	335	73	15	15	26	27	67	36	115	185	chr1.1	67263012	67263425	+	--	--	K11252 histone H2B | (GenBank) core histone H2A/H2B/H3/H4 (A)	--	XP_013469298.1	H2B1_MEDTR RecName: Full=Probable histone H2B.1;	At1g07790	GO:0000786,nucleosome; GO:0005634,nucleus; GO:0003677,DNA binding; GO:0046982,protein heterodimerization activity; GO:0003674,molecular_function; GO:0003676,nucleic acid binding; GO:0005488,binding; GO:0097159,organic cyclic compound binding; GO:1901363,heterocyclic compound binding; GO:0005515,protein binding; GO:0046983,protein dimerization activity; GO:0005622,intracellular; GO:0005575,cellula…	PF00125.24:Core histone H2A/H2B/H3/H4	--	--	--
MS.gene005850	12.3	9.15	9.73	5.68	3.41	2.87	4.63	3.11	3.65	5.6	5.53	3.66	187	155	181	96	55	48	72	52	58	87	95	52	chr1.1	67382241	67385626	-	--	--	K13123 G patch domain-containing protein 1 | (RefSeq) predicted protein (A)	--	XP_003591766.1	--	At4g31200	GO:0048471,perinuclear region of cytoplasm; GO:0003723,RNA binding; GO:0006874,cellular calcium ion homeostasis; GO:0006397,mRNA processing; GO:0003674,molecular_function; GO:0003676,nucleic acid binding; GO:0005488,binding; GO:0097159,organic cyclic compound binding; GO:1901363,heterocyclic compound binding; GO:0006873,cellular ion homeostasis; GO:0006875,cellular metal ion homeostasis; GO:00081…	PF04818.13:RNA polymerase II-binding domain.	--	--	--
MS.gene005851	6322.64	1797.13	2583.6	487.12	639.58	1078.1	1209.86	1286.15	366.72	351.53	371.03	287.43	39015	12350	19507	3342	4193	7316	7631	8738	2362	2218	2587	1656	chr1.1	67390348	67391175	-	--	--	--	--	XP_013469340.1	LCB3_ROBPS RecName: Full=Putative bark agglutinin LECRPA3; Flags: Precursor; Fragment;	At5g10530	GO:0030246,carbohydrate binding; GO:0046872,metal ion binding; GO:0003674,molecular_function; GO:0005488,binding; GO:0043167,ion binding; GO:0043169,cation binding	PF00139.19:Legume lectin domain	--	--	--
MS.gene005852	1163.73	391.77	810.8	107.62	297.74	714.03	173.45	89.76	67.91	489.23	215.07	77.13	7207	2702	6144	741	1959	4863	1098	612	439	3098	1505	446	chr1.1	67406744	67407574	-	--	--	--	--	XP_013469340.1	LCB3_ROBPS RecName: Full=Putative bark agglutinin LECRPA3; Flags: Precursor; Fragment;	At5g65600	GO:0030246,carbohydrate binding; GO:0046872,metal ion binding; GO:0003674,molecular_function; GO:0005488,binding; GO:0043167,ion binding; GO:0043169,cation binding	PF00139.19:Legume lectin domain	--	--	--
MS.gene005853	2426.95	1162.6	1561.04	564.06	720.14	1312.67	861.15	513.67	360.92	242.44	430.41	375.65	15410	8221	12128	3982	4858	9166	5589	3591	2392	1574	3088	2227	chr1.1	67413746	67414597	-	--	--	--	--	XP_003599063.1	LECN_PEA RecName: Full=Non-seed lectin; Flags: Precursor;	At5g65600	GO:0030246,carbohydrate binding; GO:0003674,molecular_function; GO:0005488,binding	PF00139.19:Legume lectin domain	--	--	--
MS.gene005856	6.16	14.6	7.34	1.63	1.14	0.64	2.37	2.66	0.39	1.28	0.18	0	61	161	89	18	12	7	24	29	4	13	2	0	chr1.1	67430502	67433398	-	--	--	K24940 CWF19-like protein 2 | (RefSeq) hypothetical protein (A)	--	XP_003591771.1	--	At2g16980	GO:0016021,integral component of membrane; GO:0022857,transmembrane transporter activity; GO:0003674,molecular_function; GO:0005215,transporter activity; GO:0005575,cellular_component; GO:0016020,membrane; GO:0031224,intrinsic component of membrane; GO:0044425,membrane part	PF07690.16:Major Facilitator Superfamily	--	--	--
MS.gene005857	13.96	13.63	13.48	0.46	1.9	1.38	3.96	8	1.94	0	0.99	0	138	150	163	5	20	15	40	87	20	0	11	0	chr1.1	67439064	67442451	-	--	--	K24940 CWF19-like protein 2 | (RefSeq) hypothetical protein (A)	--	XP_003591772.1	--	At2g16980	GO:0016021,integral component of membrane; GO:0022857,transmembrane transporter activity; GO:0003674,molecular_function; GO:0005215,transporter activity; GO:0005575,cellular_component; GO:0016020,membrane; GO:0031224,intrinsic component of membrane; GO:0044425,membrane part	PF07690.16:Major Facilitator Superfamily	--	--	--
MS.gene005866	5.19	4.66	4.44	2.12	3.55	10.95	9.24	31.94	24.65	40.63	42.82	11.5	44	44	46	20	32	102	80	298	218	352	410	91	chr1.1	67520299	67522051	-	--	--	K14491 two-component response regulator ARR-B family | (RefSeq) two-component response regulator ARR12 isoform X2 (A)	ko04075: Plant hormone signal transduction	XP_003591795.2	HHO2_ARATH RecName: Full=Transcription factor HHO2 {ECO:0000305}; AltName: Full=MYB-domain transcription factor HHO2 {ECO:0000305}; AltName: Full=Protein HRS1 HOMOLOG 2 {ECO:0000303|PubMed:27016098};	At1g68670	GO:0005634,nucleus; GO:0003700,DNA-binding transcription factor activity; GO:0001217,bacterial-type RNA polymerase transcriptional repressor activity, sequence-specific DNA binding; GO:0000976,transcription regulatory region sequence-specific DNA binding; GO:0071456,cellular response to hypoxia; GO:0055062,phosphate ion homeostasis; GO:0006355,regulation of transcription, DNA-templated; GO:000973…	PF00249.31:Myb-like DNA-binding domain	GARP-G2-like	TF	GARP->GARP-G2-like
MS.gene005888	0	0	0	18.9	13.44	0.25	0	20.07	0	1.05	20.75	11.54	0	0	0	78	53	1	0	82	0	4	87	40	chr1.1	67860906	67864317	+	--	--	--	--	GAU16348.1	--	At2g31725	--	PF05811.13:Eukaryotic protein of unknown function (DUF842)	--	--	--
MS.gene005901	0	0	0	30.11	15.88	0.97	5.24	15.57	6.93	1.05	16.12	0	0	0	0	125	63	4	20	64	27	4	68	0	chr1.1	68018510	68021978	+	--	--	--	--	GAU16348.1	--	At2g31725	--	PF05811.13:Eukaryotic protein of unknown function (DUF842)	--	--	--
MS.gene005904	0.11	0.48	0.7	7.2	4.32	2.23	2.3	13.67	5.42	4.91	13.32	13.72	1	5	8	75	43	23	22	141	53	47	141	120	chr1.1	68050502	68051758	+	--	--	K13429 chitin elicitor receptor kinase 1 | (RefSeq) lysM domain receptor-like kinase 3 isoform X1 (A)	ko04626: Plant-pathogen interaction	XP_003591872.1	LYK3_ARATH RecName: Full=LysM domain receptor-like kinase 3; Short=LysM-containing receptor-like kinase 3; EC=2.7.11.-; Flags: Precursor;	At3g57120	GO:0016021,integral component of membrane; GO:0005886,plasma membrane; GO:0005524,ATP binding; GO:0004674,protein serine/threonine kinase activity; GO:0009738,abscisic acid-activated signaling pathway; GO:0006952,defense response; GO:0050832,defense response to fungus; GO:0045087,innate immune response; GO:0031348,negative regulation of defense response; GO:0009789,positive regulation of abscisic…	PF07714.17:Protein tyrosine kinase	--	--	--
MS.gene005931	2.95	3.34	4.09	18.3	13.95	6.19	8.48	11.42	9.84	6.15	10.56	2.96	46	58	78	317	231	106	135	196	160	98	186	43	chr1.3	65763823	65772619	-	--	--	K16298 serine carboxypeptidase-like clade IV [EC:3.4.16.-] | (GenBank) serine carboxypeptidase-like protein (A)	--	XP_013469440.1	SCP49_ARATH RecName: Full=Serine carboxypeptidase-like 49; EC=3.4.16.-; Flags: Precursor;	At3g10410	GO:0005829,cytosol; GO:0005576,extracellular region; GO:0005773,vacuole; GO:0004185,serine-type carboxypeptidase activity; GO:0003674,molecular_function; GO:0003824,catalytic activity; GO:0004180,carboxypeptidase activity; GO:0008236,serine-type peptidase activity; GO:0008233,peptidase activity; GO:0008238,exopeptidase activity; GO:0070011,peptidase activity, acting on L-amino acid peptides; GO:0…	PF00450.22:Serine carboxypeptidase	--	--	--
MS.gene005950	0	0	0	1.63	1.71	0	0.85	1.12	0.56	0	1.03	0	0	0	0	25	25	0	12	17	8	0	16	0	chr1.3	65923935	65931219	-	--	--	--	--	XP_013469514.1	MUC70_ARATH RecName: Full=Probable hexosyltransferase MUCI70 {ECO:0000305}; EC=2.4.1.- {ECO:0000269|PubMed:30228108}; AltName: Full=Protein MUCILAGE-RELATED 70 {ECO:0000303|PubMed:30228108};	At1g34550	GO:0005794,Golgi apparatus; GO:0000139,Golgi membrane; GO:0016021,integral component of membrane; GO:0016757,transferase activity, transferring glycosyl groups; GO:0080001,mucilage extrusion from seed coat; GO:0048358,mucilage pectin biosynthetic process; GO:0010246,rhamnogalacturonan I biosynthetic process; GO:0045491,xylan metabolic process; GO:0003674,molecular_function; GO:0003824,catalytic a…	PF04765.13:Protein of unknown function (DUF616)	--	--	--
MS.gene005953	0	0	0	41.19	37.06	1.22	5.24	52.54	2.82	1.31	22.28	10.33	0	0	0	171	147	5	20	216	11	5	94	36	chr1.3	65940563	65944036	-	--	--	--	--	GAU16348.1	--	At2g31725	--	PF05811.13:Eukaryotic protein of unknown function (DUF842)	--	--	--
MS.gene005974	2.06	1.39	6.05	252.67	76.1	3.29	162.07	230.62	31.97	2.69	214.82	36.3	12	9	43	1633	470	21	963	1476	194	16	1411	197	chr1.3	66279894	66283292	+	--	--	K09872 aquaporin PIP | (RefSeq) aquaporin PIP2-1-like (A)	--	GAU15876.1	PIP22_ARATH RecName: Full=Aquaporin PIP2-2; AltName: Full=Plasma membrane intrinsic protein 2-2; Short=AtPIP2;2; AltName: Full=Plasma membrane intrinsic protein 2b; Short=PIP2b; AltName: Full=TMP2b;	At2g37170	GO:0005783,endoplasmic reticulum; GO:0016021,integral component of membrane; GO:0005886,plasma membrane; GO:0009506,plasmodesma; GO:0003729,mRNA binding; GO:0015250,water channel activity; GO:0009737,response to abscisic acid; GO:0009414,response to water deprivation; GO:0006833,water transport; GO:0003674,molecular_function; GO:0003676,nucleic acid binding; GO:0003723,RNA binding; GO:0005488,bin…	PF00230.20:Major intrinsic protein	--	--	--
MS.gene005985	0	0.21	0.19	0.63	5.89	0	15.42	13.26	3.11	2.04	19.07	21.1	0	1	1	3	27	0	68	63	14	9	93	85	chr1.3	66452275	66454065	-	--	--	K06688 ubiquitin-conjugating enzyme E2 C [EC:2.3.2.23] | (GenBank) ubiquitin-conjugating enzyme E2 (A)	ko04120: Ubiquitin mediated proteolysis	XP_003591943.1	UBC20_ARATH RecName: Full=Ubiquitin-conjugating enzyme E2 20; EC=2.3.2.23; AltName: Full=E2 ubiquitin-conjugating enzyme 20; AltName: Full=Ubiquitin carrier protein 20;	At3g20060	GO:0005634,nucleus; GO:0005524,ATP binding; GO:0061631,ubiquitin conjugating enzyme activity; GO:0004842,ubiquitin-protein transferase activity; GO:0031145,anaphase-promoting complex-dependent catabolic process; GO:0000209,protein polyubiquitination; GO:0030071,regulation of mitotic metaphase/anaphase transition; GO:0000166,nucleotide binding; GO:0003674,molecular_function; GO:0005488,binding; GO…	PF00179.26:Ubiquitin-conjugating enzyme	--	--	--
MS.gene005994	0.6	0.63	0.41	2.06	18.47	0.45	2.05	2.62	0.48	0.1	1.5	3.31	6	7	5	23	197	5	21	29	5	1	17	31	chr1.3	66547201	66548644	-	--	--	K03231 elongation factor 1-alpha | (GenBank) GTP-binding elongation factor Tu family protein (A)	ko03013: RNA transport	XP_003591959.2	EF1A_VICFA RecName: Full=Elongation factor 1-alpha; Short=EF-1-alpha;	At1g07920	GO:0005737,cytoplasm; GO:0005525,GTP binding; GO:0003924,GTPase activity; GO:0003746,translation elongation factor activity; GO:0000166,nucleotide binding; GO:0001882,nucleoside binding; GO:0001883,purine nucleoside binding; GO:0003674,molecular_function; GO:0005488,binding; GO:0017076,purine nucleotide binding; GO:0019001,guanyl nucleotide binding; GO:0032549,ribonucleoside binding; GO:0032550,p…	PF00009.27:Elongation factor Tu GTP binding domain	--	--	--
MS.gene006004	0	1.12	0.58	0	2.51	0.32	2.08	6.61	3.06	2.78	13.67	150.18	0	7	4	0	15	2	12	41	18	16	87	790	chr1.3	66603271	66604026	+	--	--	--	--	XP_003591967.1	--	--	--	--	--	--	--
MS.gene006023	11.88	10.23	11.98	0.09	8.56	7.4	2.16	3.74	4.68	4.22	13.99	0	124	119	153	1	95	85	23	43	51	45	165	0	chr1.3	66801830	66807067	+	--	--	K13696 abhydrolase domain-containing protein 1/3 | (RefSeq) hypothetical protein (A)	--	XP_003591995.1	EMB8_PICGL RecName: Full=Embryogenesis-associated protein EMB8; EC=3.1.1.-;	At1g34340	GO:0052689,carboxylic ester hydrolase activity; GO:0003674,molecular_function; GO:0003824,catalytic activity; GO:0016787,hydrolase activity; GO:0016788,hydrolase activity, acting on ester bonds	PF12146.8:Serine aminopeptidase, S33	--	--	--
MS.gene006034	0.78	5.72	1.7	0	0	0	1.02	0	0.25	0.64	0.12	3.34	6	49	16	0	0	0	8	0	2	5	1	24	chr1.3	66982068	66983852	+	--	--	K21553 isoliquiritigenin 2'-O-methyltransferase [EC:2.1.1.154] | (GenBank) caffeic acid O-methyltransferase (A)	--	P93324.1	CHOMT_MEDSA RecName: Full=Isoliquiritigenin 2'-O-methyltransferase; Short=MsCHMT; EC=2.1.1.154 {ECO:0000269|PubMed:1731632, ECO:0000269|PubMed:9055445}; AltName: Full=Chalcone O-methyltransferase; Short=ChOMT; AltName: Full=Licodione 2'-O-methyltransferase; Short=MsLMT; EC=2.1.1.65 {ECO:0000269|PubMed:9055445};	At5g54160	GO:0033802,isoliquiritigenin 2'-O-methyltransferase activity; GO:0030751,licodione 2'-O-methyltransferase activity; GO:0046983,protein dimerization activity; GO:0032259,methylation; GO:0003674,molecular_function; GO:0003824,catalytic activity; GO:0008168,methyltransferase activity; GO:0008171,O-methyltransferase activity; GO:0008757,S-adenosylmethionine-dependent methyltransferase activity; GO:00…	PF00891.18:O-methyltransferase domain	--	--	--
MS.gene006036	2.86	10.62	1.17	0	0	0	1.65	0.35	0.87	1.91	0.92	0	22	91	11	0	0	0	13	3	7	15	8	0	chr1.3	66997529	66999313	+	--	--	K21553 isoliquiritigenin 2'-O-methyltransferase [EC:2.1.1.154] | (GenBank) caffeic acid O-methyltransferase (A)	--	P93324.1	CHOMT_MEDSA RecName: Full=Isoliquiritigenin 2'-O-methyltransferase; Short=MsCHMT; EC=2.1.1.154 {ECO:0000269|PubMed:1731632, ECO:0000269|PubMed:9055445}; AltName: Full=Chalcone O-methyltransferase; Short=ChOMT; AltName: Full=Licodione 2'-O-methyltransferase; Short=MsLMT; EC=2.1.1.65 {ECO:0000269|PubMed:9055445};	At5g54160	GO:0033802,isoliquiritigenin 2'-O-methyltransferase activity; GO:0030751,licodione 2'-O-methyltransferase activity; GO:0046983,protein dimerization activity; GO:0032259,methylation; GO:0003674,molecular_function; GO:0003824,catalytic activity; GO:0008168,methyltransferase activity; GO:0008171,O-methyltransferase activity; GO:0008757,S-adenosylmethionine-dependent methyltransferase activity; GO:00…	PF00891.18:O-methyltransferase domain	--	--	--
MS.gene006037	8.22	25.2	61.55	5.75	0.86	1.66	13.84	14.92	19.9	4.91	6.26	7.58	36	123	330	28	4	8	62	72	91	22	31	31	chr1.3	67000566	67001501	+	--	--	K21553 isoliquiritigenin 2'-O-methyltransferase [EC:2.1.1.154] | (GenBank) caffeic acid O-methyltransferase (A)	--	P93324.1	CHOMT_MEDSA RecName: Full=Isoliquiritigenin 2'-O-methyltransferase; Short=MsCHMT; EC=2.1.1.154 {ECO:0000269|PubMed:1731632, ECO:0000269|PubMed:9055445}; AltName: Full=Chalcone O-methyltransferase; Short=ChOMT; AltName: Full=Licodione 2'-O-methyltransferase; Short=MsLMT; EC=2.1.1.65 {ECO:0000269|PubMed:9055445};	At5g54160	GO:0033802,isoliquiritigenin 2'-O-methyltransferase activity; GO:0030751,licodione 2'-O-methyltransferase activity; GO:0046983,protein dimerization activity; GO:0032259,methylation; GO:0003674,molecular_function; GO:0003824,catalytic activity; GO:0008168,methyltransferase activity; GO:0008171,O-methyltransferase activity; GO:0008757,S-adenosylmethionine-dependent methyltransferase activity; GO:00…	PF00891.18:O-methyltransferase domain	--	--	--
MS.gene006119	17.09	14.21	19.12	11.76	56.56	53.71	55.2	52.71	41.75	19.18	12.69	71.73	149	138	204	114	524	515	492	506	380	171	125	584	chr1.4	76283139	76284438	+	--	--	K00660 chalcone synthase [EC:2.3.1.74] | (GenBank) chalcone and stilbene synthase family protein (A)	ko00941: Flavonoid biosynthesis; ko01100: Metabolic pathways; ko01110: Biosynthesis of secondary metabolites; ko04712: Circadian rhythm - plant	XP_003592044.1	CHS4_MEDSA RecName: Full=Chalcone synthase 4; EC=2.3.1.74; AltName: Full=CHS12-1; AltName: Full=Naringenin-chalcone synthase 4;	At5g13930	GO:0016210,naringenin-chalcone synthase activity; GO:0009813,flavonoid biosynthetic process; GO:0003674,molecular_function; GO:0003824,catalytic activity; GO:0016740,transferase activity; GO:0016746,transferase activity, transferring acyl groups; GO:0016747,transferase activity, transferring acyl groups other than amino-acyl groups; GO:0008152,metabolic process; GO:0008150,biological_process; GO:…	PF00195.19:Chalcone and stilbene synthases, N-terminal domain	--	--	--
MS.gene006150	0.21	3.36	0.85	18.71	2.94	2.27	25.03	17.57	1.99	30.72	19.7	2.45	1	18	5	100	15	12	123	93	10	151	107	11	chr1.4	76562971	76564525	-	--	--	K12900 serine/arginine-rich splicing factor 10 | (RefSeq) serine/arginine-rich SC35-like splicing factor SCL30A (A)	ko03040: Spliceosome	XP_003592075.1	EF110_ARATH RecName: Full=Ethylene-responsive transcription factor ERF110;	At5g50080	GO:0005634,nucleus; GO:0003677,DNA binding; GO:0003700,DNA-binding transcription factor activity; GO:0009873,ethylene-activated signaling pathway; GO:0045893,positive regulation of transcription, DNA-templated; GO:0048510,regulation of timing of transition from vegetative to reproductive phase; GO:0003674,molecular_function; GO:0003676,nucleic acid binding; GO:0005488,binding; GO:0097159,organic …	PF00847.20:AP2 domain	AP2/ERF-ERF	TF	AP2/ERF->AP2/ERF-ERF
MS.gene006154	129.25	103.29	195.71	38.37	14.57	21.07	76.86	54.58	50.98	22.99	25.37	3.07	1127	1003	2088	372	135	202	685	524	464	205	250	25	chr1.4	76635257	76638180	-	--	--	K02925 large subunit ribosomal protein L3e | (GenBank) 60S ribosomal protein L3B (A)	ko03010: Ribosome	XP_003592084.2	RL31_ARATH RecName: Full=60S ribosomal protein L3-1; AltName: Full=Protein EMBRYO DEFECTIVE 2207;	At1g43170	GO:0005618,cell wall; GO:0005829,cytosol; GO:0022625,cytosolic large ribosomal subunit; GO:0022626,cytosolic ribosome; GO:0005730,nucleolus; GO:0005634,nucleus; GO:0005886,plasma membrane; GO:0009506,plasmodesma; GO:0042788,polysomal ribosome; GO:0005774,vacuolar membrane; GO:0005773,vacuole; GO:0003729,mRNA binding; GO:0003723,RNA binding; GO:0003735,structural constituent of ribosome; GO:000002…	PF00297.22:Ribosomal protein L3	--	--	--
MS.gene006196	5.03	5.17	5.67	9.64	17.7	15.75	13.51	11.08	16.68	24.64	19.3	8.11	166	190	229	354	621	572	456	403	575	832	720	250	chr1.4	77268760	77274704	+	--	--	K05666 ATP-binding cassette, subfamily C (CFTR/MRP), member 2 | (GenBank) ABC transporter-like family-protein (A)	ko02010: ABC transporters	XP_003592151.2	AB10C_ARATH RecName: Full=ABC transporter C family member 10; Short=ABC transporter ABCC.10; Short=AtABCC10; EC=7.6.2.2; AltName: Full=ATP-energized glutathione S-conjugate pump 14; AltName: Full=Glutathione S-conjugate-transporting ATPase 14; AltName: Full=Multidrug resistance-associated protein 14;	At3g59140	GO:0005829,cytosol; GO:0016021,integral component of membrane; GO:0016020,membrane; GO:0000325,plant-type vacuole; GO:0005774,vacuolar membrane; GO:0008559,xenobiotic transmembrane transporting ATPase activity; GO:0005524,ATP binding; GO:0042626,ATPase activity, coupled to transmembrane movement of substances; GO:0055085,transmembrane transport; GO:0003674,molecular_function; GO:0042623,ATPase ac…	PF00005.27:ABC transporter	--	--	--
MS.gene006206	0.04	0.14	0.34	0.03	0.18	0.21	0.78	2.3	0.8	0.15	0.94	0.81	1	4	11	1	5	6	21	67	22	4	28	20	chr1.4	77341207	77351312	-	--	--	K13420 LRR receptor-like serine/threonine-protein kinase FLS2 [EC:2.7.11.1] | (RefSeq) LRR receptor-like serine/threonine-protein kinase FLS2 (A)	ko04016: MAPK signaling pathway - plant; ko04626: Plant-pathogen interaction	PNY03617.1	Y5248_ARATH RecName: Full=G-type lectin S-receptor-like serine/threonine-protein kinase At5g24080; EC=2.7.11.1; Flags: Precursor;	At5g24080	GO:0016021,integral component of membrane; GO:0005886,plasma membrane; GO:0005524,ATP binding; GO:0005516,calmodulin binding; GO:0030246,carbohydrate binding; GO:0106310,NA; GO:0004674,protein serine/threonine kinase activity; GO:0106311,NA; GO:0048544,recognition of pollen; GO:0000166,nucleotide binding; GO:0003674,molecular_function; GO:0005488,binding; GO:0008144,drug binding; GO:0017076,purin…	PF00069.25:Protein kinase domain	--	--	--
MS.gene006227	20.45	30.98	20.11	21.84	36.39	46.77	78.14	53.1	104.07	75.93	37.32	246.71	64	108	77	76	121	161	250	183	340	243	132	721	7052	13244	14265	-	--	--	K11883 RNA-binding protein NOB1 | (RefSeq) RNA-binding protein NOB1 isoform X1 (A)	ko03008: Ribosome biogenesis in eukaryotes	XP_003592192.1	HIP39_ARATH RecName: Full=Heavy metal-associated isoprenylated plant protein 39 {ECO:0000303|PubMed:21072340, ECO:0000303|PubMed:23368984}; Short=AtHIP39 {ECO:0000303|PubMed:21072340, ECO:0000303|PubMed:23368984}; Flags: Precursor;	At1g01490	GO:0046872,metal ion binding; GO:0003674,molecular_function; GO:0005488,binding; GO:0043167,ion binding; GO:0043169,cation binding	PF00403.26:Heavy-metal-associated domain	--	--	--
MS.gene00623	5.98	8.77	11.89	0.36	7.13	1.45	2.83	1.36	0.48	2.53	0.79	0	60	98	146	4	76	16	29	15	5	26	9	0	chr2.1	75758948	75761146	+	--	--	K00655 1-acyl-sn-glycerol-3-phosphate acyltransferase [EC:2.3.1.51] | (RefSeq) uncharacterized protein LOC105166581 (A)	ko00561: Glycerolipid metabolism; ko00564: Glycerophospholipid metabolism; ko01100: Metabolic pathways; ko01110: Biosynthesis of secondary metabolites	XP_003592967.1	MORF1_ARATH RecName: Full=Multiple organellar RNA editing factor 1, mitochondrial {ECO:0000305}; AltName: Full=RNA editing-interacting protein 8 {ECO:0000303|PubMed:23818871}; Flags: Precursor;	At4g20020	GO:0009507,chloroplast; GO:0005739,mitochondrion; GO:0046983,protein dimerization activity; GO:1900865,chloroplast RNA modification; GO:0016554,cytidine to uridine editing; GO:0080156,mitochondrial mRNA modification; GO:1900864,mitochondrial RNA modification; GO:0006397,mRNA processing; GO:0005515,protein binding; GO:0003674,molecular_function; GO:0005488,binding; GO:0008152,metabolic process; GO…	--	--	--	--
MS.gene006239	0	0.08	0.23	4.41	0	0	4.34	6.43	10.22	4.15	0	0	0	1	3	52	0	0	47	75	113	45	0	0	chr1.1	71850605	71852649	-	--	--	K01184 polygalacturonase [EC:3.2.1.15] | (RefSeq) probable polygalacturonase At3g15720 (A)	ko00040: Pentose and glucuronate interconversions; ko01100: Metabolic pathways	XP_003592202.2	PGLR_VITVI RecName: Full=Probable polygalacturonase; Short=PG {ECO:0000250|UniProtKB:Q7M1E7}; EC=3.2.1.15; AltName: Full=Pectinase {ECO:0000250|UniProtKB:Q7M1E7};	At3g48950	GO:0016021,integral component of membrane; GO:0004650,polygalacturonase activity; GO:0005975,carbohydrate metabolic process; GO:0003674,molecular_function; GO:0003824,catalytic activity; GO:0004553,hydrolase activity, hydrolyzing O-glycosyl compounds; GO:0016787,hydrolase activity; GO:0016798,hydrolase activity, acting on glycosyl bonds; GO:0008152,metabolic process; GO:0008150,biological_process…	PF00295.17:Glycosyl hydrolases family 28	--	--	--
MS.gene006242	17.41	25.62	20.15	104.6	27.99	7.91	47.54	123.19	123	139.74	88.8	89.08	72	118	102	481	123	36	201	561	531	591	415	344	chr1.1	71884557	71885111	+	--	--	--	--	AFK38248.1	--	At4g25670	--	--	--	--	--
MS.gene006251	62.23	79.16	68.34	137.6	51.25	106.69	246.7	150.72	303.69	169.9	65.97	1097.64	96	136	129	236	84	181	389	256	489	268	115	1581	chr1.1	71973823	71974571	+	--	--	K02923 large subunit ribosomal protein L38e | (GenBank) 60S ribosomal protein L38A (A)	ko03010: Ribosome	XP_003606815.2	RL38_ARATH RecName: Full=60S ribosomal protein L38;	At2g43460	GO:0005829,cytosol; GO:0022625,cytosolic large ribosomal subunit; GO:0022626,cytosolic ribosome; GO:0003735,structural constituent of ribosome; GO:0022618,ribonucleoprotein complex assembly; GO:0006412,translation; GO:0003674,molecular_function; GO:0005198,structural molecule activity; GO:0008150,biological_process; GO:0009987,cellular process; GO:0022607,cellular component assembly; GO:0016043,c…	PF01781.18:Ribosomal L38e protein family	--	--	--
MS.gene006299	6.83	10.79	2.63	2.6	3.19	7.65	22.71	3.32	18.21	31.99	12.71	200.33	125	220	59	53	62	154	425	67	348	599	263	3425	chr1.1	72492771	72496755	-	--	--	--	--	XP_013469671.1	LTI65_ARATH RecName: Full=Low-temperature-induced 65 kDa protein; AltName: Full=Desiccation-responsive protein 29B;	At5g52300	GO:0009738,abscisic acid-activated signaling pathway; GO:0010150,leaf senescence; GO:0009737,response to abscisic acid; GO:0009409,response to cold; GO:0009651,response to salt stress; GO:0009414,response to water deprivation; GO:0001101,response to acid chemical; GO:0007165,signal transduction; GO:0007154,cell communication; GO:0008150,biological_process; GO:0009719,response to endogenous stimul…	--	--	--	--
MS.gene006310	4.09	4.2	4.18	4.34	7.57	7.97	7.29	18.32	33.33	22.3	24.45	0	28	32	35	33	55	60	51	138	238	156	189	0	chr1.1	72613778	72615093	+	--	--	--	--	XP_013469687.1	FBL53_ARATH RecName: Full=F-box/LRR-repeat protein At3g48880;	At3g48880	GO:1905761,SCF ubiquitin ligase complex binding; GO:0050829,defense response to Gram-negative bacterium; GO:0003674,molecular_function; GO:0005488,binding; GO:0044877,protein-containing complex binding; GO:0006952,defense response; GO:0042742,defense response to bacterium; GO:0006950,response to stress; GO:0008150,biological_process; GO:0009605,response to external stimulus; GO:0009607,response t…	PF12937.7:F-box-like	--	--	--
MS.gene006356	3.36	4.13	2.89	7.47	13.15	26.85	11.42	29.71	13.04	23.34	16.27	0	19	26	20	47	79	167	66	185	77	135	104	0	chr1.1	73288538	73291549	-	--	--	--	--	XP_004496626.1	--	At5g51840	--	PF09548.10:Stage III sporulation protein AB (spore_III_AB)	--	--	--
MS.gene006382	1.34	17.27	18.09	11.47	2.1	5.9	0.44	0.41	0.64	0.66	0.99	0	6	86	99	57	10	29	2	2	3	3	5	0	chr1.3	70451499	70452404	-	--	--	K17290 oxidoreductase [EC:1.1.1.-] | (RefSeq) Oxidoreductase HTATIP2 (A)	--	AAK63815.1	ELI_PEA RecName: Full=Early light-induced protein, chloroplastic; Short=ELIP; Flags: Precursor;	At3g22840	GO:0031969,chloroplast membrane; GO:0016021,integral component of membrane; GO:0005622,intracellular; GO:0005575,cellular_component; GO:0016020,membrane; GO:0005623,cell; GO:0005737,cytoplasm; GO:0043231,intracellular membrane-bounded organelle; GO:0009507,chloroplast; GO:0009526,plastid envelope; GO:0009536,plastid; GO:0009941,chloroplast envelope; GO:0031090,organelle membrane; GO:0031967,organ…	PF00504.21:Chlorophyll A-B binding protein	--	--	--
MS.gene006411	16.93	0.17	0	0.17	5.61	8.43	0.09	0	0.54	0.18	0.17	0	179	2	0	2	63	98	1	0	6	2	2	0	chr1.3	70800670	70805599	-	--	--	K09458 3-oxoacyl-[acyl-carrier-protein] synthase II [EC:2.3.1.179] | (GenBank) 3-oxoacyl-(acyl carrier) synthase II (A)	ko00061: Fatty acid biosynthesis; ko00780: Biotin metabolism; ko01100: Metabolic pathways; ko01212: Fatty acid metabolism; ko01240: Biosynthesis of cofactors	XP_013469773.1	KASC1_ARATH RecName: Full=3-oxoacyl-[acyl-carrier-protein] synthase I, chloroplastic; EC=2.3.1.41; AltName: Full=Beta-ketoacyl-ACP synthase I; Short=KAS I; Flags: Precursor;	At5g46290	GO:0009570,chloroplast stroma; GO:0004315,3-oxoacyl-[acyl-carrier-protein] synthase activity; GO:0006633,fatty acid biosynthetic process; GO:0003674,molecular_function; GO:0003824,catalytic activity; GO:0004312,fatty acid synthase activity; GO:0016740,transferase activity; GO:0016746,transferase activity, transferring acyl groups; GO:0016747,transferase activity, transferring acyl groups other th…	PF00109.26:Beta-ketoacyl synthase, N-terminal domain	--	--	--
MS.gene006418	8.95	18.39	11.54	22.44	15.29	9.2	59.42	73.34	56.61	40.75	43.54	23.95	38	87	60	106	69	43	258	343	251	177	209	95	chr1.3	70871304	70871873	-	--	--	--	--	XP_013469781.1	--	At2g32020	GO:0004042,acetyl-CoA:L-glutamate N-acetyltransferase activity; GO:0103045,methione N-acyltransferase activity; GO:0003674,molecular_function; GO:0003824,catalytic activity; GO:0008080,N-acetyltransferase activity; GO:0016407,acetyltransferase activity; GO:0016410,N-acyltransferase activity; GO:0016740,transferase activity; GO:0016746,transferase activity, transferring acyl groups; GO:0016747,tra…	PF13302.7:Acetyltransferase (GNAT) domain	GNAT	TR	GNAT
MS.gene006450	5.08	3.51	7.34	0.7	0.55	4.08	0.96	0.18	1.12	0.96	1.38	4.6	26	20	46	4	3	23	5	1	6	5	8	22	chr1.2	77187337	77188023	+	--	--	--	--	XP_013469832.1	OFP11_ARATH RecName: Full=Transcription repressor OFP11; AltName: Full=Ovate family protein 11; Short=AtOFP11;	At4g14860	GO:0005634,nucleus; GO:0045892,negative regulation of transcription, DNA-templated; GO:0008152,metabolic process; GO:0006139,nucleobase-containing compound metabolic process; GO:0006351,transcription, DNA-templated; GO:0006355,regulation of transcription, DNA-templated; GO:0006725,cellular aromatic compound metabolic process; GO:0006807,nitrogen compound metabolic process; GO:0008150,biological_p…	PF04844.13:Transcriptional repressor, ovate	OFP	TF	OFP
MS.gene006516	0	0	0	0	0	0	1.14	0.71	1.49	1.9	5.16	31.24	0	0	0	0	0	0	3	2	4	5	15	75	chr4.2	32515896	32516369	-	--	--	--	--	XP_013456600.1	--	At4g33550	--	PF14368.6:Probable lipid transfer	--	--	--
MS.gene006529	1.03	0.65	1.34	13.87	1.55	4.77	9.05	8.59	1.48	6.03	4	0	10	7	16	150	16	51	90	92	15	60	44	0	chr4.2	32362588	32363892	+	--	--	K00671 glycylpeptide N-tetradecanoyltransferase [EC:2.3.1.97] | (GenBank) glycylpeptide N-tetradecanoyltransferase (A)	--	XP_013456609.1	NMT1_ARATH RecName: Full=Glycylpeptide N-tetradecanoyltransferase 1; EC=2.3.1.97 {ECO:0000269|PubMed:10734119, ECO:0000269|PubMed:12912986}; AltName: Full=Myristoyl-CoA:protein N-myristoyltransferase 1; Short=NMT 1; Short=Type I N-myristoyltransferase 1; AltName: Full=Peptide N-myristoyltransferase 1;	At5g57020	GO:0005737,cytoplasm; GO:0005829,cytosol; GO:0009536,plastid; GO:0005840,ribosome; GO:0004379,glycylpeptide N-tetradecanoyltransferase activity; GO:0019107,myristoyltransferase activity; GO:0010064,embryonic shoot morphogenesis; GO:0018008,N-terminal peptidyl-glycine N-myristoylation; GO:0006499,N-terminal protein myristoylation; GO:0003674,molecular_function; GO:0003824,catalytic activity; GO:00…	PF02799.15:Myristoyl-CoA:protein N-myristoyltransferase, C-terminal domain	--	--	--
MS.gene006581	4.37	2.9	2.81	1.59	3.38	1.99	1.43	0.76	0.85	0.51	1.15	4.91	84	62	66	34	69	42	28	16	17	10	25	88	chr4.4	32470287	32474487	+	--	--	K12811 ATP-dependent RNA helicase DDX46/PRP5 [EC:3.6.4.13] | (RefSeq) uncharacterized protein LOC106427234 (A)	ko03040: Spliceosome	XP_013456645.1	Y3293_ARATH RecName: Full=WEB family protein At3g02930, chloroplastic; Flags: Precursor;	At3g02930	GO:0009507,chloroplast; GO:0005783,endoplasmic reticulum; GO:0005875,microtubule associated complex; GO:0007131,reciprocal meiotic recombination; GO:0000003,reproduction; GO:0000280,nuclear division; GO:0008152,metabolic process; GO:0006139,nucleobase-containing compound metabolic process; GO:0006259,DNA metabolic process; GO:0006310,DNA recombination; GO:0006725,cellular aromatic compound metabo…	PF05701.11:Weak chloroplast movement under blue light	--	--	--
MS.gene006620	11.28	10.3	16.37	22.04	19.4	12.56	40.33	53.34	38.19	42.41	23.75	0	58	59	103	126	106	71	212	302	205	223	138	0	chr4.4	31967981	31969312	+	--	--	K09286 EREBP-like factor | (GenBank) ethylene response factor (A)	--	XP_003607496.1	ERF4_TOBAC RecName: Full=Ethylene-responsive transcription factor 4; AltName: Full=Ethylene-responsive element-binding factor 3; Short=EREBP-3; AltName: Full=Ethylene-responsive element-binding factor 4 homolog; AltName: Full=NtERF3;	At5g44210	GO:0005634,nucleus; GO:0003677,DNA binding; GO:0003700,DNA-binding transcription factor activity; GO:0006952,defense response; GO:0009873,ethylene-activated signaling pathway; GO:0003674,molecular_function; GO:0003676,nucleic acid binding; GO:0005488,binding; GO:0097159,organic cyclic compound binding; GO:1901363,heterocyclic compound binding; GO:0140110,transcription regulator activity; GO:00069…	PF00847.20:AP2 domain	AP2/ERF-ERF	TF	AP2/ERF->AP2/ERF-ERF
MS.gene006633	26.66	29.26	9.68	84.45	2.23	0.81	1.74	0.54	0	0	0	11.1	90	110	40	317	8	3	6	2	0	0	0	35	chr4.4	31852362	31853040	+	--	--	K25075 pterocarpan synthase [EC:4.2.1.139] | (RefSeq) dirigent protein 1 (A)	ko00943: Isoflavonoid biosynthesis; ko01100: Metabolic pathways; ko01110: Biosynthesis of secondary metabolites	XP_013456685.1	DIR21_ARATH RecName: Full=Dirigent protein 21; Short=AtDIR21; Flags: Precursor;	At1g65870	GO:0005618,cell wall; GO:0005576,extracellular region; GO:0005575,cellular_component; GO:0005623,cell; GO:0030312,external encapsulating structure; GO:0044464,cell part; GO:0071944,cell periphery	PF03018.14:Dirigent-like protein	--	--	--
MS.gene006644	21.45	18.89	8.14	0.88	9.9	7.39	2.47	2.42	1.61	0.69	2.98	0	153	150	71	7	75	58	18	19	12	5	24	0	chr4.1	26851128	26852674	-	--	--	K16040 trans-resveratrol di-O-methyltransferase [EC:2.1.1.240] | (RefSeq) trans-resveratrol di-O-methyltransferase (A)	ko00945: Stilbenoid, diarylheptanoid and gingerol biosynthesis	XP_003607523.2	OMT3_HUMLU RecName: Full=Probable O-methyltransferase 3 {ECO:0000303|PubMed:18223037}; Short=HlOMT3 {ECO:0000303|PubMed:18223037}; EC=2.1.1.- {ECO:0000305};	At4g35150	GO:0008171,O-methyltransferase activity; GO:0046983,protein dimerization activity; GO:0032259,methylation; GO:0003674,molecular_function; GO:0003824,catalytic activity; GO:0008168,methyltransferase activity; GO:0016740,transferase activity; GO:0016741,transferase activity, transferring one-carbon groups; GO:0005515,protein binding; GO:0005488,binding; GO:0008152,metabolic process; GO:0008150,biol…	PF00891.18:O-methyltransferase domain	--	--	--
MS.gene006675	1.77	0.95	0.96	0.42	6.65	3	7.6	5.13	3.5	17.15	2.81	3.66	15	9	10	4	60	28	66	48	31	149	27	29	chr4.1	26507636	26513219	+	--	--	--	--	XP_003607568.2	--	At2g31130	GO:0005776,autophagosome; GO:0061908,phagophore; GO:0005622,intracellular; GO:0005575,cellular_component; GO:0005773,vacuole; GO:0005623,cell; GO:0005737,cytoplasm; GO:0043231,intracellular membrane-bounded organelle; GO:0043226,organelle; GO:0043227,membrane-bounded organelle; GO:0043229,intracellular organelle; GO:0044424,intracellular part; GO:0044444,cytoplasmic part; GO:0044464,cell part	--	--	--	--
MS.gene006739	0.73	1.31	2.27	21.96	4.4	4.78	1.14	2.39	31.65	13.58	13.19	20.51	5	10	19	167	32	36	8	18	226	95	102	131	chr4.1	25805168	25806085	+	--	--	K08770 ubiquitin C | (RefSeq) pco110026; uncharacterized protein LOC100282068 (A)	ko04120: Ubiquitin mediated proteolysis	XP_015896861.1	UBI1P_NICSY RecName: Full=Polyubiquitin; Contains: RecName: Full=Ubiquitin; Flags: Precursor;	At4g02890	GO:0005737,cytoplasm; GO:0005634,nucleus; GO:0005622,intracellular; GO:0005575,cellular_component; GO:0005623,cell; GO:0044424,intracellular part; GO:0044464,cell part; GO:0043231,intracellular membrane-bounded organelle; GO:0043226,organelle; GO:0043227,membrane-bounded organelle; GO:0043229,intracellular organelle	PF00240.23:Ubiquitin family	--	--	--
MS.gene006747	0.25	3.83	3.99	11.72	7.08	6.95	29.42	5.69	37.45	20.58	23.06	7.78	2	34	39	104	60	61	240	50	312	168	208	58	chr4.1	25718998	25723782	+	--	--	K03522 electron transfer flavoprotein alpha subunit | (GenBank) electron transfer flavoprotein subunit alpha (A)	--	XP_003607652.1	ETFA_ARATH RecName: Full=Electron transfer flavoprotein subunit alpha, mitochondrial; Short=Alpha-ETF; Flags: Precursor;	At1g50940	GO:0005759,mitochondrial matrix; GO:0005739,mitochondrion; GO:0005634,nucleus; GO:0005507,copper ion binding; GO:0009055,electron transfer activity; GO:0050660,flavin adenine dinucleotide binding; GO:0033539,fatty acid beta-oxidation using acyl-CoA dehydrogenase; GO:0003674,molecular_function; GO:0005488,binding; GO:0046872,metal ion binding; GO:0043167,ion binding; GO:0043169,cation binding; GO:…	PF01012.21:Electron transfer flavoprotein domain	--	--	--
MS.gene006767	22.19	11.7	3.74	48.47	11.27	7.37	82.69	140.75	136.32	380.25	225.35	244.05	63	37	13	153	34	23	240	440	404	1104	723	647	chr4.1	25550869	25552407	+	--	--	K03671 thioredoxin 1 | (GenBank) thioredoxin (A)	--	XP_003607703.1	CXXS1_ARATH RecName: Full=Thioredoxin-like protein CXXS1; Short=AtCXXS1; AltName: Full=Mono-cysteine thioredoxin 1;	At1g11530	GO:0005829,cytosol; GO:0005576,extracellular region; GO:0003756,protein disulfide isomerase activity; GO:0003674,molecular_function; GO:0003824,catalytic activity; GO:0016853,isomerase activity; GO:0016860,intramolecular oxidoreductase activity; GO:0016864,intramolecular oxidoreductase activity, transposing S-S bonds; GO:0140096,catalytic activity, acting on a protein; GO:0005622,intracellular; G…	PF00085.20:Thioredoxin	--	--	--
MS.gene006796	63.41	9.36	16	10.18	3.89	6.37	4.22	2.94	5.51	0.35	1.75	0	353	58	109	63	23	39	24	18	32	2	11	0	chr4.1	25190719	25191710	+	--	--	K20628 expansin | (RefSeq) expansin-A1-like (A)	--	XP_003607738.1	EXP10_ARATH RecName: Full=Expansin-A10; Short=AtEXPA10; AltName: Full=Alpha-expansin-10; Short=At-EXP10; Short=AtEx10; AltName: Full=Ath-ExpAlpha-1.1; Flags: Precursor;	At1g26770	GO:0005618,cell wall; GO:0005576,extracellular region; GO:0016020,membrane; GO:0009664,plant-type cell wall organization; GO:0008150,biological_process; GO:0009987,cellular process; GO:0016043,cellular component organization; GO:0045229,external encapsulating structure organization; GO:0071554,cell wall organization or biogenesis; GO:0071555,cell wall organization; GO:0071669,plant-type cell wall…	PF01357.21:Pollen allergen	--	--	--
MS.gene006799	5.89	3.59	2.12	1.48	1.77	4.07	20.5	22.24	11.28	19.11	16.88	0.25	25	17	11	7	8	19	89	104	50	83	81	1	chr4.1	25116095	25117191	-	--	--	--	--	XP_003607732.1	CASP2_MEDTR RecName: Full=Casparian strip membrane protein 2; Short=MtCASP2;	At5g15290	GO:0016021,integral component of membrane; GO:0005886,plasma membrane; GO:0051539,4 iron, 4 sulfur cluster binding; GO:0042545,cell wall modification; GO:0007043,cell-cell junction assembly; GO:0003674,molecular_function; GO:0005488,binding; GO:0048037,cofactor binding; GO:0051536,iron-sulfur cluster binding; GO:0051540,metal cluster binding; GO:0008150,biological_process; GO:0009987,cellular pro…	PF04535.12:Domain of unknown function (DUF588)	--	--	--
MS.gene006801	0.97	1.09	2.11	0.14	0.3	0.22	0.24	0	0.08	0.08	0.07	1.73	12	15	32	2	4	3	3	0	1	1	1	20	chr4.1	25100008	25102687	+	--	--	K11426 [histone H3]-lysine4/36 N-trimethyltransferase SMYD [EC:2.1.1.354 2.1.1.357] | (RefSeq) hypothetical protein (A)	ko00310: Lysine degradation; ko01100: Metabolic pathways	XP_003607750.1	ATXR2_ARATH RecName: Full=Histone-lysine N-methyltransferase ATXR2; EC=2.1.1.-; AltName: Full=Protein SET DOMAIN GROUP 36; AltName: Full=Trithorax-related protein 2; Short=TRX-related protein 2;	At1g26760	GO:0005634,nucleus; GO:0018024,histone-lysine N-methyltransferase activity; GO:0046872,metal ion binding; GO:0003674,molecular_function; GO:0003824,catalytic activity; GO:0008168,methyltransferase activity; GO:0008170,N-methyltransferase activity; GO:0008276,protein methyltransferase activity; GO:0008757,S-adenosylmethionine-dependent methyltransferase activity; GO:0016278,lysine N-methyltransfer…	PF00856.28:SET domain	SET	TR	SET
MS.gene006810	143.92	94.97	81.07	63.89	78.75	44.5	54.31	20.31	25.71	50.43	38.19	20.29	547	402	377	270	318	186	211	85	102	196	164	72	chr4.1	24928953	24932211	-	--	--	K20352 p24 family protein delta-1 | (GenBank) emp24/gp25L/p24 family protein (A)	--	XP_013456763.1	P24D9_ARATH RecName: Full=Transmembrane emp24 domain-containing protein p24delta9; AltName: Full=p24 family protein delta2c; Short=p24delta2c; AltName: Full=p24 family protein delta9; Short=p24delta9; Flags: Precursor;	At1g26690	GO:0030134,COPII-coated ER to Golgi transport vesicle; GO:0005783,endoplasmic reticulum; GO:0005789,endoplasmic reticulum membrane; GO:0005793,endoplasmic reticulum-Golgi intermediate compartment; GO:0005794,Golgi apparatus; GO:0032580,Golgi cisterna membrane; GO:0016021,integral component of membrane; GO:0006888,ER to Golgi vesicle-mediated transport; GO:0007030,Golgi organization; GO:0006886,in…	PF01105.24:emp24/gp25L/p24 family/GOLD	--	--	--
MS.gene006813	7.33	10.07	3.69	4.51	5.9	4.39	20.65	25.6	23.41	16.79	8.48	8.05	117	179	72	80	100	77	337	450	390	274	153	120	chr4.1	24903114	24907177	-	--	--	K21989 calcium permeable stress-gated cation channel | (GenBank) ERD (early-responsive to dehydration stress) family protein (A)	--	XP_013456767.1	CSCLB_ARATH RecName: Full=CSC1-like protein At1g69450;	At1g69450	GO:0016021,integral component of membrane; GO:0005886,plasma membrane; GO:0005227,calcium activated cation channel activity; GO:0003674,molecular_function; GO:0005215,transporter activity; GO:0005216,ion channel activity; GO:0005261,cation channel activity; GO:0022857,transmembrane transporter activity; GO:0008324,cation transmembrane transporter activity; GO:0015075,ion transmembrane transporter…	PF02714.15:Calcium-dependent channel, 7TM region, putative phosphate	--	--	--
MS.gene006832	400.52	419.88	120.46	78.17	82.29	48.07	165.59	83.56	26.3	17.89	8.1	27.76	788	920	290	171	172	104	333	181	54	36	18	51	chr4.1	24689485	24689748	-	--	--	--	--	GAU32880.1	--	--	--	--	--	--	--
MS.gene006841	0	0	0	0	1.08	0	1.86	15.58	4.75	4.97	5.74	4.22	0	0	0	0	9	0	15	135	39	40	51	31	chr4.1	24642215	24644094	-	--	--	K19825 2-alkenal reductase (NADP+) [EC:1.3.1.102] | (RefSeq) NADP-dependent alkenal double bond reductase P2-like (A)	--	XP_003607791.1	DBR_TOBAC RecName: Full=2-alkenal reductase (NADP(+)-dependent); EC=1.3.1.102 {ECO:0000269|PubMed:17945329, ECO:0000269|Ref.3, ECO:0000269|Ref.4}; AltName: Full=Alkenal double bound reductase; AltName: Full=Allylic alcohol dehydrogenase 1 {ECO:0000303|PubMed:11117876}; Short=allyl-ADH1 {ECO:0000303|PubMed:11117876}; AltName: Full=Flavin-free double bond reductase {ECO:0000303|Ref.4}; Short=NtDBR;…	At3g03080	GO:0032440,2-alkenal reductase [NAD(P)] activity; GO:0003674,molecular_function; GO:0003824,catalytic activity; GO:0016491,oxidoreductase activity; GO:0016627,oxidoreductase activity, acting on the CH-CH group of donors; GO:0016628,oxidoreductase activity, acting on the CH-CH group of donors, NAD or NADP as acceptor	PF00107.26:Zinc-binding dehydrogenase	--	--	--
MS.gene006851	0.7	0.21	1.53	11.58	7.93	7.45	2.98	14.68	5.16	15.12	8.91	10.03	3	1	8	55	36	35	13	69	23	66	43	40	chr4.1	24549425	24551306	-	--	--	K19891 glucan endo-1,3-beta-glucosidase 1/2/3 [EC:3.2.1.39] | (RefSeq) glucan endo-1,3-beta-glucosidase 3-like (A)	ko00500: Starch and sucrose metabolism; ko01100: Metabolic pathways	XP_003607801.1	PDCB2_ARATH RecName: Full=PLASMODESMATA CALLOSE-BINDING PROTEIN 2; Short=AtPDCB2; AltName: Full=Glucan endo-1,3-beta-glucosidase-like protein 3; Flags: Precursor;	At5g08000	GO:0031225,anchored component of membrane; GO:0046658,anchored component of plasma membrane; GO:0009506,plasmodesma; GO:0001872,(1->3)-beta-D-glucan binding; GO:0030247,polysaccharide binding; GO:0009408,response to heat; GO:0001871,pattern binding; GO:0003674,molecular_function; GO:0030246,carbohydrate binding; GO:0005488,binding; GO:0006950,response to stress; GO:0008150,biological_process; GO:…	PF07983.13:X8 domain	--	--	--
MS.gene006856	60.78	47.46	43.98	14.1	6.3	24.86	12.62	15.97	6.68	16.73	1.61	0.1	636	553	563	164	70	286	135	184	73	179	19	1	chr4.1	24504684	24508055	+	--	--	K24983 Ras GTPase-activating protein-binding protein 2 | (GenBank) ras-GTPase-activating protein-binding protein, putative (A)	--	XP_003607810.2	NTF2_ARATH RecName: Full=Nuclear transport factor 2 {ECO:0000303|PubMed:28229965}; Short=AtNTF2 {ECO:0000303|PubMed:28229965};	At5g60980	GO:0005737,cytoplasm; GO:0005829,cytosol; GO:0005634,nucleus; GO:0009536,plastid; GO:1990904,ribonucleoprotein complex; GO:0003729,mRNA binding; GO:0031047,gene silencing by RNA; GO:0009737,response to abscisic acid; GO:0003674,molecular_function; GO:0003676,nucleic acid binding; GO:0003723,RNA binding; GO:0005488,binding; GO:0097159,organic cyclic compound binding; GO:1901363,heterocyclic compou…	PF02136.20:Nuclear transport factor 2 (NTF2) domain	--	--	--
MS.gene006857	139.92	119.46	175.28	53.64	19.97	53.71	24.68	21.87	40.65	34.77	18.27	3.68	244	232	374	104	37	103	44	42	74	62	36	6	chr4.1	24479494	24481058	+	--	--	K12622 U6 snRNA-associated Sm-like protein LSm3 | (RefSeq) sm-like protein LSM3B (A)	ko03018: RNA degradation; ko03040: Spliceosome	ACJ86068.1	LSM3A_ARATH RecName: Full=Sm-like protein LSM3A {ECO:0000305}; Short=AtLSM3A {ECO:0000303|PubMed:23620288}; AltName: Full=U6 snRNA-associated Sm-like protein LSM3A {ECO:0000305};	At1g21190	GO:0071013,catalytic step 2 spliceosome; GO:1990726,Lsm1-7-Pat1 complex; GO:0005634,nucleus; GO:0000932,P-body; GO:0071011,precatalytic spliceosome; GO:0046540,U4/U6 x U5 tri-snRNP complex; GO:0005688,U6 snRNP; GO:0003723,RNA binding; GO:0000398,mRNA splicing, via spliceosome; GO:0000956,nuclear-transcribed mRNA catabolic process; GO:0033962,cytoplasmic mRNA processing body assembly; GO:0003674,m…	--	--	--	--
MS.gene006895	9.57	8.59	8.45	15.81	4.14	5.41	3.54	1.17	1.49	2.28	3.2	0	37	37	40	68	17	23	14	5	6	9	14	0	chr4.2	25929100	25932085	-	--	--	K08906 cytochrome c6 | (GenBank) cytochrome protein C (A)	ko00195: Photosynthesis	XP_003607878.1	CYC6_ARATH RecName: Full=Cytochrome c6, chloroplastic {ECO:0000303|PubMed:12037572}; AltName: Full=Cytochrome c-552; Short=Atc6 {ECO:0000303|PubMed:12037572}; AltName: Full=Cytochrome c-553; AltName: Full=Cytochrome c553; AltName: Full=Soluble cytochrome f; Flags: Precursor;	At5g45040	GO:0009543,chloroplast thylakoid lumen; GO:0009055,electron transfer activity; GO:0020037,heme binding; GO:0005506,iron ion binding; GO:0015979,photosynthesis; GO:0003674,molecular_function; GO:0003824,catalytic activity; GO:0016491,oxidoreductase activity; GO:0005488,binding; GO:0046906,tetrapyrrole binding; GO:0048037,cofactor binding; GO:0097159,organic cyclic compound binding; GO:1901363,hete…	PF13442.6:Cytochrome C oxidase, cbb3-type, subunit III	--	--	--
MS.gene006970	39.88	37.32	24.31	367.95	89.76	62.16	79.67	48.1	95.41	263.08	123.42	706.6	189	197	141	1939	452	324	386	251	472	1275	661	3127	chr4.2	25352222	25353535	-	--	--	--	--	XP_013456859.1	Y1648_ARATH RecName: Full=Uncharacterized protein At1g66480;	At2g01340	GO:0005886,plasma membrane; GO:0009620,response to fungus; GO:0008150,biological_process; GO:0009605,response to external stimulus; GO:0009607,response to biotic stimulus; GO:0051707,response to other organism; GO:0043207,response to external biotic stimulus; GO:0050896,response to stimulus; GO:0051704,multi-organism process; GO:0005575,cellular_component; GO:0016020,membrane; GO:0005623,cell; GO…	PF14009.6:Domain of unknown function (DUF4228)	--	--	--
MS.gene007014	4.19	17.41	4.28	0.94	5.43	34.16	2.39	0.95	0.84	0.85	2.32	1.5	24	111	30	6	33	215	14	6	5	5	15	8	51722	5087	6228	+	--	--	K00430 peroxidase [EC:1.11.1.7] | (GenBank) cationic peroxidase (A)	ko00940: Phenylpropanoid biosynthesis; ko01100: Metabolic pathways; ko01110: Biosynthesis of secondary metabolites	XP_013450324.1	PER3_ARATH RecName: Full=Peroxidase 3; Short=Atperox P3; EC=1.11.1.7; AltName: Full=ATPRC; AltName: Full=RCI3A; AltName: Full=Rare cold-inducible protein; Flags: Precursor;	At1g05260	GO:0005783,endoplasmic reticulum; GO:0005576,extracellular region; GO:0009505,plant-type cell wall; GO:0009506,plasmodesma; GO:0020037,heme binding; GO:0046872,metal ion binding; GO:0004601,peroxidase activity; GO:0042744,hydrogen peroxide catabolic process; GO:0042538,hyperosmotic salinity response; GO:0009409,response to cold; GO:0009269,response to desiccation; GO:0006979,response to oxidative…	PF00141.23:Peroxidase	--	--	--
MS.gene007082	0	0	0.26	5.91	5	21.9	0	0.57	0	4.89	16.06	0.33	0	0	1	21	17	77	0	2	0	16	58	1	chr7.3	7179483	7180574	+	--	--	K15095 (+)-neomenthol dehydrogenase [EC:1.1.1.208] | (GenBank) short chain dehydrogenase (A)	ko00902: Monoterpenoid biosynthesis; ko01110: Biosynthesis of secondary metabolites	XP_013450259.1	SDR1_ARATH RecName: Full=(+)-neomenthol dehydrogenase {ECO:0000303|PubMed:18599651}; EC=1.1.1.- {ECO:0000269|PubMed:21169366}; EC=1.1.1.208 {ECO:0000269|PubMed:18599651}; AltName: Full=Menthone:neomenthol reductase; AltName: Full=Short-chain dehydrogenase/reductase 1; Short=AtSDR1;	At3g61220	GO:0005737,cytoplasm; GO:0016020,membrane; GO:0047501,(+)-neomenthol dehydrogenase activity; GO:0006952,defense response; GO:0003674,molecular_function; GO:0003824,catalytic activity; GO:0016491,oxidoreductase activity; GO:0016614,oxidoreductase activity, acting on CH-OH group of donors; GO:0016616,oxidoreductase activity, acting on the CH-OH group of donors, NAD or NADP as acceptor; GO:0006950,r…	PF00106.25:short chain dehydrogenase	--	--	--
MS.gene007083	0	0	0.17	3.69	1.54	1.49	0.2	0.19	0.2	0.2	0.91	0	0	0	1	20	8	8	1	1	1	1	5	0	chr7.3	7192357	7193673	+	--	--	K15095 (+)-neomenthol dehydrogenase [EC:1.1.1.208] | (RefSeq) (+)-neomenthol dehydrogenase-like (A)	ko00902: Monoterpenoid biosynthesis; ko01110: Biosynthesis of secondary metabolites	PNX75564.1	SDR1_ARATH RecName: Full=(+)-neomenthol dehydrogenase {ECO:0000303|PubMed:18599651}; EC=1.1.1.- {ECO:0000269|PubMed:21169366}; EC=1.1.1.208 {ECO:0000269|PubMed:18599651}; AltName: Full=Menthone:neomenthol reductase; AltName: Full=Short-chain dehydrogenase/reductase 1; Short=AtSDR1;	At3g61220	GO:0005737,cytoplasm; GO:0016020,membrane; GO:0047501,(+)-neomenthol dehydrogenase activity; GO:0006952,defense response; GO:0003674,molecular_function; GO:0003824,catalytic activity; GO:0016491,oxidoreductase activity; GO:0016614,oxidoreductase activity, acting on CH-OH group of donors; GO:0016616,oxidoreductase activity, acting on the CH-OH group of donors, NAD or NADP as acceptor; GO:0006950,r…	PF00106.25:short chain dehydrogenase	--	--	--
MS.gene007146	7.42	10.17	7.82	32.32	6.43	10.3	14.71	48.96	46.41	26.74	20.4	15.27	38	58	49	184	35	58	77	276	248	140	118	73	chr7.3	8522202	8522888	+	--	--	--	--	XP_013450186.1	NHL10_ARATH RecName: Full=NDR1/HIN1-like protein 10 {ECO:0000303|PubMed:14666423}; Short=AtNHL10 {ECO:0000305}; AltName: Full=Protein YELLOW-LEAF-SPECIFIC GENE 9 {ECO:0000303|PubMed:11230571};	At2g35980	GO:0046658,anchored component of plasma membrane; GO:0009507,chloroplast; GO:0016021,integral component of membrane; GO:0009506,plasmodesma; GO:0051607,defense response to virus; GO:0010150,leaf senescence; GO:0051707,response to other organism; GO:0002252,immune effector process; GO:0002376,immune system process; GO:0006952,defense response; GO:0009615,response to virus; GO:0006950,response to s…	PF03168.13:Late embryogenesis abundant protein	--	--	--
MS.gene007179	0.81	1.46	0.66	0.24	0.26	0.49	0.53	20.68	16.88	17.5	0	0.58	3	6	3	1	1	2	2	84	65	66	0	2	chr7.3	9385591	9388243	+	--	--	K12733 peptidyl-prolyl cis-trans isomerase-like 1 [EC:5.2.1.8] | (RefSeq) peptidyl-prolyl cis-trans isomerase CYP18-2 (A)	ko03040: Spliceosome	XP_004494215.1	CP18B_ARATH RecName: Full=Peptidyl-prolyl cis-trans isomerase CYP18-2; Short=PPIase CYP18-2; EC=5.2.1.8; AltName: Full=Cyclophilin of 18 kDa 2; AltName: Full=Cyclophilin-18-2;	At2g36130	GO:0005829,cytosol; GO:0005783,endoplasmic reticulum; GO:0005634,nucleus; GO:0003755,peptidyl-prolyl cis-trans isomerase activity; GO:0006457,protein folding; GO:0000413,protein peptidyl-prolyl isomerization; GO:0003674,molecular_function; GO:0003824,catalytic activity; GO:0016853,isomerase activity; GO:0016859,cis-trans isomerase activity; GO:0140096,catalytic activity, acting on a protein; GO:0…	PF00160.21:Cyclophilin type peptidyl-prolyl cis-trans isomerase/CLD	--	--	--
MS.gene007260	0.31	2.2	0.62	3.02	0.67	3.01	1.5	0.28	0.15	0.1	0.23	0.11	6	48	15	66	14	65	30	6	3	2	5	2	chr7.4	6968099	6993126	-	--	--	K00700 1,4-alpha-glucan branching enzyme [EC:2.4.1.18] | (GenBank) starch branching enzyme I (A)	ko00500: Starch and sucrose metabolism; ko01100: Metabolic pathways; ko01110: Biosynthesis of secondary metabolites	XP_003625771.2	GLGB1_PEA RecName: Full=1,4-alpha-glucan-branching enzyme 1, chloroplastic/amyloplastic; EC=2.4.1.18; AltName: Full=Starch branching enzyme I; Flags: Precursor;	At5g03650	GO:0009501,amyloplast; GO:0009507,chloroplast; GO:0003844,1,4-alpha-glucan branching enzyme activity; GO:0102752,1,4-alpha-glucan branching enzyme activity (using a glucosylated glycogenin as primer for glycogen synthesis); GO:0043169,cation binding; GO:0004553,hydrolase activity, hydrolyzing O-glycosyl compounds; GO:0009793,embryo development ending in seed dormancy; GO:0005978,glycogen biosynth…	PF02806.18:Alpha amylase, C-terminal all-beta domain	--	--	--
MS.gene007290	304.12	34.23	82.27	33.39	329.76	299.09	23.77	27.84	18.86	13.65	22.05	0	2441	306	808	298	2812	2640	195	246	158	112	200	0	chr7.4	6666925	6669666	+	--	--	K01623 fructose-bisphosphate aldolase, class I [EC:4.1.2.13] | (RefSeq) fructose-bisphosphate aldolase, cytoplasmic isozyme-like (A)	ko00010: Glycolysis / Gluconeogenesis; ko00030: Pentose phosphate pathway; ko00051: Fructose and mannose metabolism; ko00710: Carbon fixation in photosynthetic organisms; ko01100: Metabolic pathways; ko01110: Biosynthesis of secondary metabolites; ko01200: Carbon metabolism; ko01230: Biosynthesis of amino acids	XP_012569516.1	ALFC6_ARATH RecName: Full=Fructose-bisphosphate aldolase 6, cytosolic {ECO:0000305}; Short=AtFBA6 {ECO:0000303|PubMed:22561114}; EC=4.1.2.13 {ECO:0000269|PubMed:21782461}; AltName: Full=Cytosolic aldolase 2 {ECO:0000303|PubMed:21782461}; Short=cAld2 {ECO:0000303|PubMed:21782461};	At2g36460	GO:0005829,cytosol; GO:0005783,endoplasmic reticulum; GO:0005739,mitochondrion; GO:0005634,nucleus; GO:0005886,plasma membrane; GO:0009506,plasmodesma; GO:0005507,copper ion binding; GO:0004332,fructose-bisphosphate aldolase activity; GO:0003729,mRNA binding; GO:0071456,cellular response to hypoxia; GO:0030388,fructose 1,6-bisphosphate metabolic process; GO:0006094,gluconeogenesis; GO:0006096,gly…	PF00274.19:Fructose-bisphosphate aldolase class-I	--	--	--
MS.gene007323	0	0	0.38	0	0	0.14	2.75	3.55	7.04	1.84	0	0	0	0	3	0	0	1	18	25	47	12	0	0	chr7.4	7937889	7941999	+	--	--	K13463 coronatine-insensitive protein 1 | (RefSeq) coronatine-insensitive protein 1-like (A)	ko04075: Plant hormone signal transduction	GAU16025.1	HDT3_ARATH RecName: Full=Histone deacetylase HDT3; AltName: Full=HD-tuins protein 3; AltName: Full=Histone deacetylase 2c;	At5g03740	GO:0005730,nucleolus; GO:0005886,plasma membrane; GO:0016787,hydrolase activity; GO:0046872,metal ion binding; GO:0000976,transcription regulatory region sequence-specific DNA binding; GO:0006325,chromatin organization; GO:0045892,negative regulation of transcription, DNA-templated; GO:0009737,response to abscisic acid; GO:0009409,response to cold; GO:0009651,response to salt stress; GO:0009414,r…	PF17800.1:Nucleoplasmin-like domain	C2H2	TF	C2H2
MS.gene007329	0.76	0.49	3.19	0.29	0	0.59	57.64	212.96	208.76	71.18	73.42	891.05	7	5	36	3	0	6	544	2165	2012	672	766	7682	chr7.4	7886588	7887826	+	--	--	--	--	XP_013450070.1	--	At3g10040	GO:0003677,DNA binding; GO:0003674,molecular_function; GO:0003676,nucleic acid binding; GO:0005488,binding; GO:0097159,organic cyclic compound binding; GO:1901363,heterocyclic compound binding	PF13837.6:Myb/SANT-like DNA-binding domain	Trihelix	TF	Trihelix
MS.gene007370	0.1	0.19	0.23	0.84	1.74	0.83	1.1	0.26	0.87	0.64	0.12	0	4	8	11	36	71	35	43	11	35	25	5	0	chr7.4	8340651	8374997	-	--	--	K24816 maestro heat-like repeat-containing protein family member 1 | (GenBank) HEAT repeat 7A-like protein (A)	--	XP_003625712.2	SHGR6_ARATH RecName: Full=Protein SHOOT GRAVITROPISM 6;	At2g36810	GO:0009705,plant-type vacuole membrane; GO:0009660,amyloplast organization; GO:0009630,gravitropism; GO:0009959,negative gravitropism; GO:0006996,organelle organization; GO:0008150,biological_process; GO:0009657,plastid organization; GO:0009987,cellular process; GO:0016043,cellular component organization; GO:0071840,cellular component organization or biogenesis; GO:0009605,response to external st…	PF02985.22:HEAT repeat	--	--	--
MS.gene007389	0	0.48	0	40.71	13.69	10.78	0	0.49	0.52	5.8	9.54	0	0	1	0	84	27	22	0	1	1	11	20	0	chr7.4	8558454	8562171	-	--	--	--	--	XP_003625700.1	--	--	GO:0016021,integral component of membrane; GO:0005575,cellular_component; GO:0016020,membrane; GO:0031224,intrinsic component of membrane; GO:0044425,membrane part	--	--	--	--
MS.gene007392	3.19	2.87	4.1	3.28	2.15	2.08	0.74	0.41	2.04	0	0	0	21	21	33	24	15	15	5	3	14	0	0	0	chr7.4	8574361	8576536	-	--	--	K08235 xyloglucan:xyloglucosyl transferase [EC:2.4.1.207] | (GenBank) xyloglucan endotransglucosylase/hydrolase family protein (A)	--	XP_003625695.1	XTH32_ARATH RecName: Full=Probable xyloglucan endotransglucosylase/hydrolase protein 32; Short=At-XTH32; Short=XTH-32; EC=2.4.1.207; Flags: Precursor;	At2g36870	GO:0048046,apoplast; GO:0005618,cell wall; GO:0004553,hydrolase activity, hydrolyzing O-glycosyl compounds; GO:0016762,xyloglucan:xyloglucosyl transferase activity; GO:0042546,cell wall biogenesis; GO:0016998,cell wall macromolecule catabolic process; GO:0071555,cell wall organization; GO:0010411,xyloglucan metabolic process; GO:0003674,molecular_function; GO:0003824,catalytic activity; GO:001678…	PF00722.21:Glycosyl hydrolases family 16	--	--	--
MS.gene007438	12.53	15.31	12.37	11.9	0.82	8.7	3.06	2.37	1.83	0.51	6.62	0.37	72	98	87	76	5	55	18	15	11	3	43	2	chr7.3	11959811	11960581	+	--	--	--	--	XP_003625615.2	FLA11_ARATH RecName: Full=Fasciclin-like arabinogalactan protein 11; Flags: Precursor;	At5g03170	GO:0031225,anchored component of membrane; GO:0005886,plasma membrane; GO:0009834,plant-type secondary cell wall biogenesis; GO:0008150,biological_process; GO:0009832,plant-type cell wall biogenesis; GO:0009987,cellular process; GO:0042546,cell wall biogenesis; GO:0044085,cellular component biogenesis; GO:0071554,cell wall organization or biogenesis; GO:0071669,plant-type cell wall organization o…	PF02469.22:Fasciclin domain	--	--	--
MS.gene007449	56.83	48.67	61.5	84.24	43.59	19.14	13.38	23.9	11.09	4.12	4.19	1.13	108	103	143	178	88	40	26	50	22	8	9	2	chr7.3	12104223	12104777	+	--	--	K10268 F-box and leucine-rich repeat protein 2/20 | (GenBank) DNA-binding protein S1FA (A)	--	XP_003625597.1	S1FA2_ORYSJ RecName: Full=DNA-binding protein S1FA2;	At3g53370	GO:0005634,nucleus; GO:0003677,DNA binding; GO:0006355,regulation of transcription, DNA-templated; GO:0003674,molecular_function; GO:0003676,nucleic acid binding; GO:0005488,binding; GO:0097159,organic cyclic compound binding; GO:1901363,heterocyclic compound binding; GO:0008152,metabolic process; GO:0006139,nucleobase-containing compound metabolic process; GO:0006351,transcription, DNA-templated…	PF04689.13:DNA binding protein S1FA	S1Fa-like	TF	S1Fa-like
MS.gene007508	19.4	4.4	4.85	0.51	1.42	5.39	2.3	2.22	1.71	1.2	0.17	0.1	206	52	63	6	16	63	25	26	19	13	2	1	chr7.4	9369654	9374351	-	--	--	K09523 DnaJ homolog subfamily C member 3 | (GenBank) DnaJ heat shock amino-terminal domain protein (A)	ko04141: Protein processing in endoplasmic reticulum	XP_003625614.1	DNJ36_ARATH RecName: Full=DnaJ protein P58IPK homolog; Short=AtP58IPK; AltName: Full=Chaperone protein dnaJ 36; Short=AtDjA36; Short=AtJ36; Flags: Precursor;	At5g03160	GO:0005783,endoplasmic reticulum; GO:0005788,endoplasmic reticulum lumen; GO:0005886,plasma membrane; GO:0044794,positive regulation by host of viral process; GO:0016032,viral process; GO:0008150,biological_process; GO:0044403,symbiont process; GO:0035821,modification of morphology or physiology of other organism; GO:0043900,regulation of multi-organism process; GO:0043902,positive regulation of …	PF00226.31:DnaJ domain	--	--	--
MS.gene007509	23.67	10.63	23.75	0	1.97	15.67	3.41	5.06	4.17	0.17	0	0	136	68	167	0	12	99	20	32	25	1	0	0	chr7.4	9366558	9367328	+	--	--	--	--	XP_003625615.2	FLA11_ARATH RecName: Full=Fasciclin-like arabinogalactan protein 11; Flags: Precursor;	At5g03170	GO:0031225,anchored component of membrane; GO:0005886,plasma membrane; GO:0009834,plant-type secondary cell wall biogenesis; GO:0008150,biological_process; GO:0009832,plant-type cell wall biogenesis; GO:0009987,cellular process; GO:0042546,cell wall biogenesis; GO:0044085,cellular component biogenesis; GO:0071554,cell wall organization or biogenesis; GO:0071669,plant-type cell wall organization o…	PF02469.22:Fasciclin domain	--	--	--
MS.gene007576	0.62	0.79	1.01	12.83	8.7	7.37	2.84	12.24	9.95	14.81	21.66	86.38	7	10	14	162	105	92	33	153	118	172	278	916	chr7.1	9479813	9481336	+	--	--	K13496 UDP-glucosyltransferase 73C [EC:2.4.1.-] | (GenBank) UDP-glucosyltransferase family protein (A)	ko00908: Zeatin biosynthesis; ko01110: Biosynthesis of secondary metabolites	XP_003625716.1	U73C5_ARATH RecName: Full=UDP-glycosyltransferase 73C5; EC=2.4.1.-; AltName: Full=Cytokinin-O-glucosyltransferase 3; AltName: Full=Deoxynivalenol-glucosyl-transferase 1; AltName: Full=Zeatin O-glucosyltransferase 3; Short=AtZOG3;	At2g36800	GO:0005783,endoplasmic reticulum; GO:0016021,integral component of membrane; GO:0050502,cis-zeatin O-beta-D-glucosyltransferase activity; GO:0046527,glucosyltransferase activity; GO:0080046,quercetin 4'-O-glucosyltransferase activity; GO:0080044,quercetin 7-O-glucosyltransferase activity; GO:0050403,trans-zeatin O-beta-D-glucosyltransferase activity; GO:0008194,UDP-glycosyltransferase activity; G…	PF00201.18:UDP-glucoronosyl and UDP-glucosyl transferase	--	--	--
MS.gene007615	0.43	0.1	1.59	0.39	0.41	1.08	12.82	51.64	29.67	76.37	41.88	118.08	4	1	18	4	4	11	121	525	286	721	437	1018	chr7.3	10755671	10756909	-	--	--	--	--	XP_013450070.1	--	At3g10040	GO:0003677,DNA binding; GO:0003674,molecular_function; GO:0003676,nucleic acid binding; GO:0005488,binding; GO:0097159,organic cyclic compound binding; GO:1901363,heterocyclic compound binding	PF13837.6:Myb/SANT-like DNA-binding domain	Trihelix	TF	Trihelix
MS.gene007659	27.43	9.57	13.14	2.04	2.47	1.91	1.54	1.11	0	0.17	0.46	0	157	61	92	13	15	12	9	7	0	1	3	0	chr4.4	44685693	44686460	-	--	--	K22772 flavonol-3-O-glucoside L-rhamnosyltransferase [EC:2.4.1.159] | (GenBank) UDP-glucosyltransferase family protein (A)	ko00944: Flavone and flavonol biosynthesis; ko01110: Biosynthesis of secondary metabolites	XP_003606381.2	FG2KO_SOYBN RecName: Full=UDP-glycosyltransferase 79A6 {ECO:0000303|PubMed:24072327}; EC=2.4.1.159 {ECO:0000305}; AltName: Full=Flavonol 3-O-glucoside (1->6) rhamnosyltransferase {ECO:0000303|PubMed:24072327}; Short=GmF3G6''Rt-a {ECO:0000303|PubMed:24072327};	At5g54010	GO:0047230,flavonol-3-O-glucoside L-rhamnosyltransferase activity; GO:0003674,molecular_function; GO:0003824,catalytic activity; GO:0008194,UDP-glycosyltransferase activity; GO:0016740,transferase activity; GO:0016757,transferase activity, transferring glycosyl groups; GO:0016758,transferase activity, transferring hexosyl groups	PF00201.18:UDP-glucoronosyl and UDP-glucosyl transferase	--	--	--
MS.gene00766	0.53	0.16	0.36	0.95	3.88	3.19	0.69	0.56	0.08	0.34	0.78	0.09	6	2	5	12	47	40	8	7	1	4	10	1	chr2.3	64478743	64485617	+	--	--	K01578 malonyl-CoA decarboxylase [EC:4.1.1.9] | (GenBank) malonyl-CoA decarboxylase (A)	ko00410: beta-Alanine metabolism; ko00640: Propanoate metabolism; ko01100: Metabolic pathways; ko04146: Peroxisome	XP_013462895.1	--	At4g04320	GO:0005759,mitochondrial matrix; GO:0005782,peroxisomal matrix; GO:0050080,malonyl-CoA decarboxylase activity; GO:0006085,acetyl-CoA biosynthetic process; GO:0006633,fatty acid biosynthetic process; GO:2001294,malonyl-CoA catabolic process; GO:0046321,positive regulation of fatty acid oxidation; GO:0003674,molecular_function; GO:0003824,catalytic activity; GO:0016829,lyase activity; GO:0016830,ca…	PF05292.11:Malonyl-CoA decarboxylase C-terminal domain	--	--	--
MS.gene007670	0.45	0.86	0.63	0.86	1.75	3.03	0.56	0.52	0.31	0.13	0.06	0	7	15	12	15	29	52	9	9	5	2	1	0	chr4.3	42444031	42447168	-	--	--	K14486 auxin response factor | (RefSeq) auxin response factor 19 (A)	ko04075: Plant hormone signal transduction	XP_013456002.1	ARFJ_ARATH RecName: Full=Auxin response factor 10;	At2g28350	GO:0005634,nucleus; GO:0003677,DNA binding; GO:0003700,DNA-binding transcription factor activity; GO:0035198,miRNA binding; GO:0009738,abscisic acid-activated signaling pathway; GO:0009734,auxin-activated signaling pathway; GO:0051301,cell division; GO:0048589,developmental growth; GO:0010154,fruit development; GO:0048366,leaf development; GO:0007389,pattern specification process; GO:0048441,peta…	PF06507.13:Auxin response factor	B3-ARF	TF	B3->B3-ARF
MS.gene007674	27.2	22.11	22.02	14.03	26.81	30.47	4.54	4.33	1.48	4.79	2.74	0	211	191	209	121	221	260	36	37	12	38	24	0	chr4.3	42488579	42491005	-	--	--	K15285 solute carrier family 35, member E3 | (GenBank) nucleotide/sugar transporter family protein (A)	--	XP_013455997.1	UXT1_ARATH RecName: Full=UDP-xylose transporter 1 {ECO:0000312|EMBL:AKA88212.1};	At1g06890	GO:0005783,endoplasmic reticulum; GO:0005789,endoplasmic reticulum membrane; GO:0005794,Golgi apparatus; GO:0000139,Golgi membrane; GO:0016021,integral component of membrane; GO:0015297,antiporter activity; GO:0005338,nucleotide-sugar transmembrane transporter activity; GO:0005464,UDP-xylose transmembrane transporter activity; GO:0008643,carbohydrate transport; GO:1900030,regulation of pectin bio…	PF03151.16:Triose-phosphate Transporter family	--	--	--
MS.gene007683	2.54	3.69	4.39	3.49	3.65	3.87	0.37	0.41	1.29	2.78	1.78	0	34	55	72	52	52	57	5	6	18	38	27	0	chr4.3	42608734	42612133	-	--	--	K01180 endo-1,3(4)-beta-glucanase [EC:3.2.1.6] | (RefSeq) uncharacterized protein LOC111487562 (A)	--	XP_003606364.1	NCRK_ARATH RecName: Full=Receptor-like serine/threonine-protein kinase NCRK; EC=2.7.11.1; Flags: Precursor;	At2g28250	GO:0012505,endomembrane system; GO:0005768,endosome; GO:0010008,endosome membrane; GO:0016021,integral component of membrane; GO:0005886,plasma membrane; GO:0005524,ATP binding; GO:0051020,GTPase binding; GO:0106310,NA; GO:0106311,NA; GO:0006468,protein phosphorylation; GO:0010089,xylem development; GO:0000166,nucleotide binding; GO:0003674,molecular_function; GO:0005488,binding; GO:0008144,drug …	PF00069.25:Protein kinase domain	--	--	--
MS.gene007704	20.96	14.02	19.98	0.76	0.48	0.46	10.79	5.47	10.08	3.9	1.13	2.27	247	184	288	10	6	6	130	71	124	47	15	25	chr4.3	43150288	43152173	+	--	--	K02575 MFS transporter, NNP family, nitrate/nitrite transporter | (GenBank) high affinity nitrate transporter 2.7 (A)	ko00910: Nitrogen metabolism	XP_013455976.1	NRT21_ARATH RecName: Full=High-affinity nitrate transporter 2.1; Short=AtNRT2:1; AltName: Full=Protein ACH1; AltName: Full=Protein LATERAL ROOT INITIATION 1;	At1g08090	GO:0016021,integral component of membrane; GO:0016020,membrane; GO:0009705,plant-type vacuole membrane; GO:0005886,plasma membrane; GO:0015112,nitrate transmembrane transporter activity; GO:0071249,cellular response to nitrate; GO:0048527,lateral root development; GO:0042128,nitrate assimilation; GO:0015706,nitrate transport; GO:0010167,response to nitrate; GO:0003674,molecular_function; GO:00052…	PF07690.16:Major Facilitator Superfamily	--	--	--
MS.gene007705	13.83	11.05	4.51	0.31	0.32	0.08	6.23	2.08	2.68	0.91	0.38	0	163	145	65	4	4	1	75	27	33	11	5	0	chr4.3	43165986	43167895	-	--	--	K02575 MFS transporter, NNP family, nitrate/nitrite transporter | (GenBank) high affinity nitrate transporter 2.7 (A)	ko00910: Nitrogen metabolism	XP_013455976.1	NRT21_ARATH RecName: Full=High-affinity nitrate transporter 2.1; Short=AtNRT2:1; AltName: Full=Protein ACH1; AltName: Full=Protein LATERAL ROOT INITIATION 1;	At1g08090	GO:0016021,integral component of membrane; GO:0016020,membrane; GO:0009705,plant-type vacuole membrane; GO:0005886,plasma membrane; GO:0015112,nitrate transmembrane transporter activity; GO:0071249,cellular response to nitrate; GO:0048527,lateral root development; GO:0042128,nitrate assimilation; GO:0015706,nitrate transport; GO:0010167,response to nitrate; GO:0003674,molecular_function; GO:00052…	PF07690.16:Major Facilitator Superfamily	--	--	--
MS.gene007720	0.89	0.16	3.51	1.61	1.68	0.98	1.93	5.85	10.28	26.25	18.21	93.13	5	1	24	10	10	6	11	36	60	150	115	486	chr4.4	45720523	45721272	-	--	--	K09422 transcription factor MYB, plant | (GenBank) myb transcription factor (A)	--	XP_013455940.1	MYB87_ARATH RecName: Full=Transcription factor MYB87 {ECO:0000305}; AltName: Full=Myb-related protein 87 {ECO:0000305}; Short=AtMYB87 {ECO:0000312|EMBL:CAB09241.1};	At4g37780	GO:0005634,nucleus; GO:0003677,DNA binding; GO:0003700,DNA-binding transcription factor activity; GO:0007275,multicellular organism development; GO:0009664,plant-type cell wall organization; GO:0003674,molecular_function; GO:0003676,nucleic acid binding; GO:0005488,binding; GO:0097159,organic cyclic compound binding; GO:1901363,heterocyclic compound binding; GO:0140110,transcription regulator act…	PF00249.31:Myb-like DNA-binding domain	MYB-related	TF	MYB->MYB-related
MS.gene007740	1.74	1.71	0.65	1.14	4.93	2.74	3.1	6.34	20.06	12.1	15.02	7.81	11	12	5	8	33	19	20	44	132	78	107	46	chr4.4	45956911	45960750	-	--	--	K10144 RING finger and CHY zinc finger domain-containing protein 1 [EC:2.3.2.27] | (RefSeq) RING finger and CHY zinc finger domain-containing protein 1 (A)	ko04120: Ubiquitin mediated proteolysis	XP_003606334.2	ZFP34_ARATH RecName: Full=E3 ubiquitin-protein ligase RZFP34 {ECO:0000305}; EC=2.3.2.27 {ECO:0000269|PubMed:26508764}; AltName: Full=CHY zinc-finger and RING protein 1 {ECO:0000303|PubMed:26508764}; AltName: Full=RING zinc-finger protein 34 {ECO:0000305}; AltName: Full=RZFP34 protein homolog {ECO:0000303|PubMed:25002225}; Short=AtRZPF34 {ECO:0000303|PubMed:25002225};	At5g22920	GO:0005783,endoplasmic reticulum; GO:0005634,nucleus; GO:0061630,ubiquitin protein ligase activity; GO:0008270,zinc ion binding; GO:0016567,protein ubiquitination; GO:1902456,regulation of stomatal opening; GO:0006511,ubiquitin-dependent protein catabolic process; GO:0003674,molecular_function; GO:0003824,catalytic activity; GO:0004842,ubiquitin-protein transferase activity; GO:0016740,transferas…	PF14599.6:Zinc-ribbon	--	--	--
MS.gene007749	0.16	0.44	0.4	0.3	0.77	0.37	1.05	1.19	6.54	6.19	4.95	0.09	2	6	6	4	10	5	13	16	83	77	68	1	chr4.4	46133148	46137462	-	--	--	K13071 pheophorbide a oxygenase [EC:1.14.15.17] | (GenBank) lethal leaf-spot protein, putative (A)	ko00860: Porphyrin and chlorophyll metabolism; ko01110: Biosynthesis of secondary metabolites	XP_003606324.1	PAO_ORYSJ RecName: Full=Pheophorbide a oxygenase, chloroplastic {ECO:0000303|PubMed:21807436}; Short=OsPaO {ECO:0000303|PubMed:21807436}; Short=Pheide a oxygenase {ECO:0000305}; EC=1.14.15.17 {ECO:0000250|UniProtKB:Q9FYC2}; Flags: Precursor;	At3g44880	GO:0009941,chloroplast envelope; GO:0009534,chloroplast thylakoid; GO:0051537,2 iron, 2 sulfur cluster binding; GO:0010277,chlorophyllide a oxygenase [overall] activity; GO:0046872,metal ion binding; GO:0032441,pheophorbide a oxygenase activity; GO:0008219,cell death; GO:0015996,chlorophyll catabolic process; GO:0042742,defense response to bacterium; GO:0009908,flower development; GO:0010154,frui…	PF08417.12:Pheophorbide a oxygenase	--	--	--
MS.gene007753	18.59	43.32	85.02	2.26	6.15	1.83	30.98	1.37	14.44	7.37	12.01	0	37	96	207	5	13	4	63	3	30	15	27	0	chr4.4	46242293	46244686	-	--	--	K02219 cyclin-dependent kinase regulatory subunit CKS1 | (GenBank) cyclin-dependent kinase regulatory subunit (A)	--	XP_003606312.1	CKS1_ARATH RecName: Full=Cyclin-dependent kinases regulatory subunit 1; AltName: Full=CKS1-At;	At2g27960	GO:0000307,cyclin-dependent protein kinase holoenzyme complex; GO:0005737,cytoplasm; GO:0005777,peroxisome; GO:0019005,SCF ubiquitin ligase complex; GO:0061575,cyclin-dependent protein serine/threonine kinase activator activity; GO:0042393,histone binding; GO:0019901,protein kinase binding; GO:0043130,ubiquitin binding; GO:0051301,cell division; GO:0042023,DNA endoreduplication; GO:0000278,mitoti…	PF01111.19:Cyclin-dependent kinase regulatory subunit	--	--	--
MS.gene007767	8.55	1.92	7.32	0.3	0.62	2.02	0.64	1.12	1.34	0.48	0.73	0	104	26	109	4	8	27	8	15	17	6	10	0	chr4.4	46542339	46546821	+	--	--	K08832 serine/threonine-protein kinase SRPK3 [EC:2.7.11.1] | (GenBank) serine kinase-like protein (A)	--	XP_013455901.1	AFC3_ARATH RecName: Full=Serine/threonine-protein kinase AFC3; EC=2.7.12.1;	At3g44850	GO:0005524,ATP binding; GO:0106310,NA; GO:0004674,protein serine/threonine kinase activity; GO:0004712,protein serine/threonine/tyrosine kinase activity; GO:0106311,NA; GO:0004714,transmembrane receptor protein tyrosine kinase activity; GO:0046777,protein autophosphorylation; GO:0000166,nucleotide binding; GO:0003674,molecular_function; GO:0005488,binding; GO:0008144,drug binding; GO:0017076,puri…	PF00069.25:Protein kinase domain	--	--	--
MS.gene007810	0.15	0.41	0.37	6.45	6.47	3.33	1.79	0.42	3.07	13.14	15.4	10.46	1	3	3	47	45	24	12	3	21	88	114	64	chr8.1	53844812	53848102	-	--	--	K04125 gibberellin 2beta-dioxygenase [EC:1.14.11.13] | (GenBank) plant gibberellin 2-oxidase (A)	ko00904: Diterpenoid biosynthesis; ko01110: Biosynthesis of secondary metabolites	XP_013445468.1	G2OX1_PEA RecName: Full=Gibberellin 2-beta-dioxygenase 1; EC=1.14.11.13; AltName: Full=GA 2-oxidase 1; AltName: Full=Gibberellin 2-beta-hydroxylase 1; AltName: Full=Gibberellin 2-oxidase 1; AltName: Full=Protein SLENDER;	At1g78440	GO:0052634,C-19 gibberellin 2-beta-dioxygenase activity; GO:0046872,metal ion binding; GO:0009686,gibberellin biosynthetic process; GO:0003674,molecular_function; GO:0003824,catalytic activity; GO:0016491,oxidoreductase activity; GO:0016705,oxidoreductase activity, acting on paired donors, with incorporation or reduction of molecular oxygen; GO:0016706,oxidoreductase activity, acting on paired do…	PF03171.20:2OG-Fe(II) oxygenase superfamily	--	--	--
MS.gene007847	1.02	0.28	0.58	1.12	1.63	1.21	2.17	1.85	5.53	18.1	6.6	1.43	23	7	16	28	39	30	50	46	130	417	168	30	chr8.1	53375606	53385701	+	--	--	K13416 brassinosteroid insensitive 1-associated receptor kinase 1 [EC:2.7.10.1 2.7.11.1] | (RefSeq) BRASSINOSTEROID INSENSITIVE 1-associated receptor kinase 1-like (A)	ko04016: MAPK signaling pathway - plant; ko04075: Plant hormone signal transduction; ko04626: Plant-pathogen interaction	XP_013445435.1	Y3148_ARATH RecName: Full=Probable leucine-rich repeat receptor-like serine/threonine-protein kinase At3g14840; EC=2.7.11.1; Flags: Precursor;	At3g14840	GO:0005829,cytosol; GO:0016021,integral component of membrane; GO:0005886,plasma membrane; GO:0009506,plasmodesma; GO:0005524,ATP binding; GO:0106310,NA; GO:0004674,protein serine/threonine kinase activity; GO:0106311,NA; GO:0009861,jasmonic acid and ethylene-dependent systemic resistance; GO:0046777,protein autophosphorylation; GO:0045088,regulation of innate immune response; GO:0000166,nucleoti…	PF00069.25:Protein kinase domain	--	--	--
MS.gene007882	0	0	0	69.14	30.92	1.27	0	170.11	10.71	99.11	197.92	95.81	0	0	0	110	47	2	0	268	16	145	320	128	chr8.3	47421679	47422115	+	--	--	--	--	XP_003628521.1	MT3_CARPA RecName: Full=Metallothionein-like protein type 3; Short=MT-3;	--	GO:0005507,copper ion binding; GO:0008270,zinc ion binding; GO:0006878,cellular copper ion homeostasis; GO:0003674,molecular_function; GO:0005488,binding; GO:0046872,metal ion binding; GO:0043167,ion binding; GO:0043169,cation binding; GO:0046914,transition metal ion binding; GO:0006873,cellular ion homeostasis; GO:0006875,cellular metal ion homeostasis; GO:0008150,biological_process; GO:0009987,…	PF01439.18:Metallothionein	--	--	--
MS.gene007917	2.9	3.25	1.69	1.3	0.97	1.51	0.81	0	0.1	0.41	0.27	0	28	35	20	14	10	16	8	0	1	4	3	0	chr8.3	46640186	46641481	-	--	--	--	--	XP_013445507.1	TCP4_ARATH RecName: Full=Transcription factor TCP4; AltName: Full=Protein MATERNAL EFFECT EMBRYO ARREST 35;	At3g15030	GO:0005634,nucleus; GO:0003677,DNA binding; GO:0001216,bacterial-type RNA polymerase transcriptional activator activity, sequence-specific DNA binding; GO:0003700,DNA-binding transcription factor activity; GO:0043565,sequence-specific DNA binding; GO:1990837,sequence-specific double-stranded DNA binding; GO:0048825,cotyledon development; GO:0048826,cotyledon morphogenesis; GO:0009793,embryo devel…	PF03634.13:TCP family transcription factor	TCP	TF	TCP
MS.gene007924	113.51	162.99	103.5	29	120.67	25.3	35.11	35.55	43.85	45.65	41.2	15.74	873	1396	974	248	986	214	276	301	352	359	358	113	chr8.3	46538924	46542264	+	--	--	K00026 malate dehydrogenase [EC:1.1.1.37] | (GenBank) malate dehydrogenase (A)	ko00020: Citrate cycle (TCA cycle); ko00270: Cysteine and methionine metabolism; ko00620: Pyruvate metabolism; ko00630: Glyoxylate and dicarboxylate metabolism; ko00710: Carbon fixation in photosynthetic organisms; ko01100: Metabolic pathways; ko01110: Biosynthesis of secondary metabolites; ko01200: Carbon metabolism	AAB99755.1	MDHM_CITLA RecName: Full=Malate dehydrogenase, mitochondrial; EC=1.1.1.37; AltName: Allergen=Citr l MDH {ECO:0000305}; Flags: Precursor;	At3g15020	GO:0005759,mitochondrial matrix; GO:0030060,L-malate dehydrogenase activity; GO:0005975,carbohydrate metabolic process; GO:0006108,malate metabolic process; GO:0006099,tricarboxylic acid cycle; GO:0003674,molecular_function; GO:0003824,catalytic activity; GO:0016491,oxidoreductase activity; GO:0016614,oxidoreductase activity, acting on CH-OH group of donors; GO:0016615,malate dehydrogenase activi…	PF02866.18:lactate/malate dehydrogenase, alpha/beta C-terminal domain	--	--	--
MS.gene007960	0.13	0.23	1.03	0.11	2.61	0.23	3.94	14.99	19.19	1.6	2.45	0	1	2	10	1	22	2	32	131	159	13	22	0	chr3.3	62874928	62879301	-	--	--	K17500 integrin-linked kinase-associated serine/threonine phosphatase 2C [EC:3.1.3.16] | (RefSeq) WAT1-related protein At3g18200 isoform X1 (A)	--	XP_003601058.1	WTR31_ARATH RecName: Full=WAT1-related protein At4g08290;	At4g08290	GO:0016021,integral component of membrane; GO:0005886,plasma membrane; GO:0022857,transmembrane transporter activity; GO:0003674,molecular_function; GO:0005215,transporter activity; GO:0005575,cellular_component; GO:0016020,membrane; GO:0031224,intrinsic component of membrane; GO:0044425,membrane part; GO:0005623,cell; GO:0044464,cell part; GO:0071944,cell periphery	PF00892.20:EamA-like transporter family	--	--	--
MS.gene007961	0.35	0.31	1.7	0.62	0.54	0.21	0.34	7.85	3.2	18.94	6.84	1.11	3	3	18	6	5	2	3	75	29	168	67	9	chr3.3	62864238	62866278	-	--	--	K17500 integrin-linked kinase-associated serine/threonine phosphatase 2C [EC:3.1.3.16] | (RefSeq) WAT1-related protein At3g18200 isoform X1 (A)	--	XP_003601057.1	WTR31_ARATH RecName: Full=WAT1-related protein At4g08290;	At4g08290	GO:0016021,integral component of membrane; GO:0005886,plasma membrane; GO:0022857,transmembrane transporter activity; GO:0003674,molecular_function; GO:0005215,transporter activity; GO:0005575,cellular_component; GO:0016020,membrane; GO:0031224,intrinsic component of membrane; GO:0044425,membrane part; GO:0005623,cell; GO:0044464,cell part; GO:0071944,cell periphery	PF00892.20:EamA-like transporter family	--	--	--
MS.gene007962	16.39	28.51	19.81	0.51	3.32	3.83	34.96	54.99	62.59	22.48	13.9	50.46	144	279	213	5	31	37	314	532	574	202	138	414	chr3.3	62850306	62854384	-	--	--	K17500 integrin-linked kinase-associated serine/threonine phosphatase 2C [EC:3.1.3.16] | (RefSeq) WAT1-related protein At3g18200 isoform X1 (A)	--	XP_003601053.1	WTR32_ARATH RecName: Full=WAT1-related protein At4g08300;	At4g08300	GO:0016021,integral component of membrane; GO:0005886,plasma membrane; GO:0022857,transmembrane transporter activity; GO:0003674,molecular_function; GO:0005215,transporter activity; GO:0005575,cellular_component; GO:0016020,membrane; GO:0031224,intrinsic component of membrane; GO:0044425,membrane part; GO:0005623,cell; GO:0044464,cell part; GO:0071944,cell periphery	PF00892.20:EamA-like transporter family	--	--	--
MS.gene007981	0	0	0	0.41	0	1.64	30.94	2.46	641.04	4.86	1.2	4.35	0	0	0	1	0	4	70	6	1481	11	3	9	chr3.3	62645582	62646094	-	--	--	--	--	XP_003601026.1	--	At5g27760	GO:0031305,integral component of mitochondrial inner membrane; GO:0005746,mitochondrial respiratory chain; GO:0033617,mitochondrial respiratory chain complex IV assembly; GO:0006996,organelle organization; GO:0007005,mitochondrion organization; GO:0008150,biological_process; GO:0008535,respiratory chain complex IV assembly; GO:0009987,cellular process; GO:0022607,cellular component assembly; GO:0…	PF04588.13:Hypoxia induced protein conserved region	--	--	--
MS.gene007986	0.46	4.57	2.27	0	0	0	4.53	0	14.33	0.6	0	0	3	33	18	0	0	0	30	0	97	4	0	0	chr3.3	62601430	62606655	-	--	--	K15296 alpha-soluble NSF attachment protein | (RefSeq) hypothetical protein (A)	--	XP_007141718.1	SNAA_VITVI RecName: Full=Alpha-soluble NSF attachment protein; Short=Alpha-SNAP; AltName: Full=N-ethylmaleimide-sensitive factor attachment protein alpha;	At3g56190	GO:0016020,membrane; GO:0006886,intracellular protein transport; GO:0016192,vesicle-mediated transport; GO:0008104,protein localization; GO:0006810,transport; GO:0008150,biological_process; GO:0015031,protein transport; GO:0015833,peptide transport; GO:0033036,macromolecule localization; GO:0034613,cellular protein localization; GO:0042886,amide transport; GO:0045184,establishment of protein loca…	PF14938.6:Soluble NSF attachment protein, SNAP	--	--	--
MS.gene008006	1.54	6.06	7.88	0.17	0	0	24.9	2.45	13.67	0.75	0	0	8	35	50	1	0	0	132	14	74	4	0	0	chr3.3	62330015	62330710	-	--	--	K14496 abscisic acid receptor PYR/PYL family | (GenBank) polyketide cyclase/dehydrase and lipid transporter (A)	ko04016: MAPK signaling pathway - plant; ko04075: Plant hormone signal transduction	XP_003600988.1	PYL4_ARATH RecName: Full=Abscisic acid receptor PYL4; AltName: Full=ABI1-binding protein 2; AltName: Full=PYR1-like protein 4; AltName: Full=Regulatory components of ABA receptor 10;	At2g38310	GO:0005737,cytoplasm; GO:0005634,nucleus; GO:0005886,plasma membrane; GO:0010427,abscisic acid binding; GO:0042803,protein homodimerization activity; GO:0004864,protein phosphatase inhibitor activity; GO:0038023,signaling receptor activity; GO:0009738,abscisic acid-activated signaling pathway; GO:0080163,regulation of protein serine/threonine phosphatase activity; GO:0003674,molecular_function; G…	PF10604.9:Polyketide cyclase / dehydrase and lipid transport	--	--	--
MS.gene008008	1.28	2.7	2.58	0	0	0	6.91	0	0.07	0	0.07	0	17	40	42	0	0	0	94	0	1	0	1	0	chr3.3	62268706	62284251	+	--	--	K23877 xyloglucan O-acetyltransferase | (RefSeq) protein ALTERED XYLOGLUCAN 4-like (A)	--	OWM69916.1	TBL33_ARATH RecName: Full=Protein trichome birefringence-like 33 {ECO:0000303|PubMed:20388664};	At2g40320	GO:0005794,Golgi apparatus; GO:0000139,Golgi membrane; GO:0016021,integral component of membrane; GO:0016413,O-acetyltransferase activity; GO:1990538,xylan O-acetyltransferase activity; GO:0009834,plant-type secondary cell wall biogenesis; GO:1990937,xylan acetylation; GO:0003674,molecular_function; GO:0003824,catalytic activity; GO:0008374,O-acyltransferase activity; GO:0016407,acetyltransferase…	PF13839.6:GDSL/SGNH-like Acyl-Esterase family found in Pmr5 and Cas1p	--	--	--
MS.gene008041	0	2.77	0.63	8.67	1.27	0.53	17.54	5.43	8.68	3.21	1.54	0	0	16	4	50	7	3	93	31	47	17	9	0	chr3.3	61926860	61928608	+	--	--	--	--	XP_003600926.1	--	At3g56010	GO:0009535,chloroplast thylakoid membrane; GO:0016021,integral component of membrane; GO:0005622,intracellular; GO:0005575,cellular_component; GO:0016020,membrane; GO:0005623,cell; GO:0005737,cytoplasm; GO:0043231,intracellular membrane-bounded organelle; GO:0009507,chloroplast; GO:0009534,chloroplast thylakoid; GO:0009536,plastid; GO:0009579,thylakoid; GO:0031976,plastid thylakoid; GO:0031984,or…	--	--	--	--
MS.gene008046	0.52	0.78	1.06	0.08	0.16	0.16	2.28	2.82	7.69	1.1	1.6	0	6	10	15	1	2	2	27	36	93	13	21	0	chr3.3	61868305	61869858	+	--	--	K23048 RING finger protein unkempt | (RefSeq) zinc finger CCCH domain-containing protein 23-like (A)	--	XP_003600919.1	C3H29_ARATH RecName: Full=Zinc finger CCCH domain-containing protein 29; Short=AtC3H29; AltName: Full=AtSZF2;	At2g40140	GO:0005634,nucleus; GO:0003677,DNA binding; GO:0003700,DNA-binding transcription factor activity; GO:0046872,metal ion binding; GO:0071456,cellular response to hypoxia; GO:0050832,defense response to fungus; GO:0006355,regulation of transcription, DNA-templated; GO:0010200,response to chitin; GO:0009409,response to cold; GO:0003674,molecular_function; GO:0003676,nucleic acid binding; GO:0005488,b…	PF12796.7:Ankyrin repeats (3 copies)	C3H	TF	C3H
MS.gene008057	0	0	0	0	0	0	4.33	4.41	13.95	0	2.05	0	0	0	0	0	0	0	21	23	69	0	11	0	chr3.3	61664585	61666729	-	--	--	--	--	GAU33640.1	--	--	GO:0004869,cysteine-type endopeptidase inhibitor activity; GO:0003674,molecular_function; GO:0004857,enzyme inhibitor activity; GO:0004866,endopeptidase inhibitor activity; GO:0061135,endopeptidase regulator activity; GO:0098772,molecular function regulator; GO:0030414,peptidase inhibitor activity; GO:0030234,enzyme regulator activity; GO:0061134,peptidase regulator activity	PF16845.5:Aspartic acid proteinase inhibitor	--	--	--
MS.gene008086	29.21	21.58	34.58	14.48	17.64	17.77	12.71	6.79	11.24	7.2	7.84	30.17	254	209	368	140	163	170	113	65	102	64	77	245	chr3.3	61348837	61350003	-	--	--	K11294 nucleolin | (RefSeq) nucleolin 2-like isoform X1 (A)	--	XP_003600855.1	STKLS_ARATH RecName: Full=GLABROUS1 enhancer-binding protein-like {ECO:0000303|PubMed:25877331}; AltName: Full=Mediator-associated protein 1 {ECO:0000303|PubMed:17560376}; AltName: Full=Protein GeBPL {ECO:0000303|PubMed:25877331}; AltName: Full=Storekeeper-like protein At4g25210 {ECO:0000305}; AltName: Full=Transcription factor At4g25210 {ECO:0000305};	At4g25210	GO:0005829,cytosol; GO:0016592,mediator complex; GO:0005730,nucleolus; GO:0005634,nucleus; GO:0000976,transcription regulatory region sequence-specific DNA binding; GO:0006355,regulation of transcription, DNA-templated; GO:0001067,regulatory region nucleic acid binding; GO:0003674,molecular_function; GO:0003676,nucleic acid binding; GO:0003677,DNA binding; GO:0003690,double-stranded DNA binding; …	PF04504.14:Protein of unknown function, DUF573	GeBP	TF	GeBP
MS.gene008107	3.38	3.12	2.21	0.35	3.64	5.09	13.52	24.13	8.05	11.81	12.65	14.17	35	36	28	4	40	58	143	275	87	125	148	137	chr3.3	61030155	61032952	+	--	--	K13493 cytokinin-N-glucosyltransferase [EC:2.4.1.-] | (RefSeq) UDP-glycosyltransferase 76C2 (A)	ko00908: Zeatin biosynthesis; ko01110: Biosynthesis of secondary metabolites	XP_003600815.1	U76F1_ARATH RecName: Full=UDP-glycosyltransferase 76F1; EC=2.4.1.-;	At3g55700	GO:0080043,quercetin 3-O-glucosyltransferase activity; GO:0080044,quercetin 7-O-glucosyltransferase activity; GO:0003674,molecular_function; GO:0003824,catalytic activity; GO:0008194,UDP-glycosyltransferase activity; GO:0016740,transferase activity; GO:0016757,transferase activity, transferring glycosyl groups; GO:0016758,transferase activity, transferring hexosyl groups; GO:0035251,UDP-glucosylt…	PF00201.18:UDP-glucoronosyl and UDP-glucosyl transferase	--	--	--
MS.gene008138	4.19	4.25	4.2	28.8	57.49	34.65	5.16	13.01	12.82	30.26	22	2.46	31	35	38	237	452	282	39	106	99	229	184	17	chr3.4	69403739	69407148	+	--	--	K23948 NADH:quinone reductase (non-electrogenic) [EC:1.6.5.9] | (RefSeq) hypothetical protein (A)	--	XP_003600771.1	--	At5g64250	GO:0051213,dioxygenase activity; GO:0004318,enoyl-[acyl-carrier-protein] reductase (NADH) activity; GO:0016631,enoyl-[acyl-carrier-protein] reductase activity; GO:0018580,nitronate monooxygenase activity; GO:0003674,molecular_function; GO:0003824,catalytic activity; GO:0016491,oxidoreductase activity; GO:0004312,fatty acid synthase activity; GO:0016627,oxidoreductase activity, acting on the CH-CH…	PF03060.15:Nitronate monooxygenase	--	--	--
MS.gene008149	3.47	3.51	3.19	13.87	7.56	10.86	22.3	33.92	35.99	21.87	23.44	26.28	16	18	18	71	37	55	105	172	173	103	122	113	chr3.4	69257345	69258562	+	--	--	K14497 protein phosphatase 2C [EC:3.1.3.16] | (GenBank) protein phosphatase 2C-like protein (A)	ko04016: MAPK signaling pathway - plant; ko04075: Plant hormone signal transduction	XP_013460724.1	P2C37_ARATH RecName: Full=Protein phosphatase 2C 37; Short=AtPP2C37; EC=3.1.3.16; AltName: Full=Protein ABA-HYPERSENSITIVE GERMINATION 3; AltName: Full=Protein phosphatase 2C A; Short=PP2CA;	At3g11410	GO:0005829,cytosol; GO:0005634,nucleus; GO:0019900,kinase binding; GO:0046872,metal ion binding; GO:0016791,phosphatase activity; GO:0004721,phosphoprotein phosphatase activity; GO:0019901,protein kinase binding; GO:0106306,NA; GO:0004722,protein serine/threonine phosphatase activity; GO:0106307,NA; GO:0009738,abscisic acid-activated signaling pathway; GO:0009788,negative regulation of abscisic a…	PF00481.21:Protein phosphatase 2C	--	--	--
MS.gene008172	0	0.15	0.4	1.47	8.76	10.54	8.3	1.48	15.95	1.6	1.01	0	0	1	3	10	57	71	52	10	102	10	7	0	chr3.4	69004329	69008440	-	--	--	K16283 E3 ubiquitin-protein ligase SDIR1 [EC:2.3.2.27] | (GenBank) RING zinc finger protein, putative (A)	--	XP_013460692.1	SDIR1_ARATH RecName: Full=E3 ubiquitin-protein ligase SDIR1 {ECO:0000305}; EC=2.3.2.27 {ECO:0000269|PubMed:17573536}; AltName: Full=Protein SALT- AND DROUGHT-INDUCED RING FINGER 1 {ECO:0000303|PubMed:17573536}; AltName: Full=RING-type E3 ubiquitin transferase SDIR1 {ECO:0000305};	At3g55530	GO:0005789,endoplasmic reticulum membrane; GO:0016021,integral component of membrane; GO:0043231,intracellular membrane-bounded organelle; GO:0046872,metal ion binding; GO:0061630,ubiquitin protein ligase activity; GO:0004842,ubiquitin-protein transferase activity; GO:0009789,positive regulation of abscisic acid-activated signaling pathway; GO:0016567,protein ubiquitination; GO:0009737,response t…	PF13639.6:Ring finger domain	--	--	--
MS.gene008206	0	0	0	5.22	2.19	0	27.85	24.27	18.92	0.57	1.03	0	0	0	0	10	4	0	49	46	34	1	2	0	chr3.1	55956672	55956902	+	--	--	--	--	XP_013460649.1	--	At5g17460	GO:0016021,integral component of membrane; GO:0005575,cellular_component; GO:0016020,membrane; GO:0031224,intrinsic component of membrane; GO:0044425,membrane part	--	--	--	--
MS.gene008230	118.13	310.66	403.66	13.75	440.42	93.16	119.68	10.07	44.32	99.08	564.67	252.63	309	905	1292	40	1224	268	320	29	121	265	1669	617	chr3.1	55543788	55544138	-	--	--	K23637 WAP four-disulfide core domain protein 3 | (RefSeq) hypothetical protein (A)	--	XP_013460631.1	ALB1D_PEA RecName: Full=Albumin-1 D; AltName: Full=PA1 D; AltName: Full=PsaA1b012; Contains: RecName: Full=Albumin-1 D chain b; AltName: Full=Leginsulin D; AltName: Full=PA1b D; Contains: RecName: Full=Albumin-1 D chain a; AltName: Full=PA1a D; Flags: Precursor;	--	GO:0045735,nutrient reservoir activity; GO:0090729,toxin activity; GO:0009405,pathogenesis; GO:0003674,molecular_function; GO:0008150,biological_process; GO:0044419,interspecies interaction between organisms; GO:0051704,multi-organism process	PF16720.5:Albumin I chain a	--	--	--
MS.gene008242	460.63	144.75	652.91	2.51	368.37	341.47	14.28	3.39	0	126.67	31.61	11.98	1483	519	2572	9	1260	1209	47	12	0	417	115	36	chr3.1	55416762	55417327	-	--	--	K23637 WAP four-disulfide core domain protein 3 | (RefSeq) hypothetical protein (A)	--	XP_003600742.1	ALB1D_PEA RecName: Full=Albumin-1 D; AltName: Full=PA1 D; AltName: Full=PsaA1b012; Contains: RecName: Full=Albumin-1 D chain b; AltName: Full=Leginsulin D; AltName: Full=PA1b D; Contains: RecName: Full=Albumin-1 D chain a; AltName: Full=PA1a D; Flags: Precursor;	--	GO:0045735,nutrient reservoir activity; GO:0090729,toxin activity; GO:0009405,pathogenesis; GO:0003674,molecular_function; GO:0008150,biological_process; GO:0044419,interspecies interaction between organisms; GO:0051704,multi-organism process	PF16720.5:Albumin I chain a	--	--	--
MS.gene008243	1.36	1.62	4.18	6.1	16.87	15.34	6.19	5.74	10.53	3.53	15.86	16.61	9	12	34	45	119	112	42	42	73	24	119	103	chr3.1	55395614	55399551	-	--	--	--	--	XP_013460584.1	PTST_ARATH RecName: Full=Protein PTST, chloroplastic {ECO:0000303|PubMed:25710501}; AltName: Full=PROTEIN TARGETING TO STARCH {ECO:0000303|PubMed:25710501}; Flags: Precursor;	At5g39790	GO:0009507,chloroplast; GO:0009569,chloroplast starch grain; GO:0009570,chloroplast stroma; GO:0030247,polysaccharide binding; GO:2001070,starch binding; GO:0010581,regulation of starch biosynthetic process; GO:0019252,starch biosynthetic process; GO:0001871,pattern binding; GO:0003674,molecular_function; GO:0030246,carbohydrate binding; GO:0005488,binding; GO:0000271,polysaccharide biosynthetic …	PF16561.5:Glycogen recognition site of AMP-activated protein kinase	--	--	--
MS.gene008306	1.76	2.04	1.1	2.88	4.67	4.7	7.68	11.07	6.63	7.07	6.03	24.56	17	22	13	31	48	50	76	118	67	70	66	222	chr3.1	54542523	54543821	+	--	--	K10260 F-box and WD-40 domain protein 7 | (RefSeq) WD40 repeat protein (A)	ko04120: Ubiquitin mediated proteolysis	XP_003600684.1	PUB21_ARATH RecName: Full=U-box domain-containing protein 21; EC=2.3.2.27; AltName: Full=Plant U-box protein 21; AltName: Full=RING-type E3 ubiquitin transferase PUB21 {ECO:0000305};	At5g37490	GO:0004842,ubiquitin-protein transferase activity; GO:0010200,response to chitin; GO:0003674,molecular_function; GO:0003824,catalytic activity; GO:0016740,transferase activity; GO:0019787,ubiquitin-like protein transferase activity; GO:0140096,catalytic activity, acting on a protein; GO:0008150,biological_process; GO:0042493,response to drug; GO:0010033,response to organic substance; GO:0010243,r…	PF04564.15:U-box domain	--	--	--
MS.gene008325	1.28	1.31	0.03	0	0.08	0.07	0.1	0	0.06	0.06	0.04	0	64	73	2	0	4	4	5	0	3	3	2	0	chr3.1	54184680	54195013	-	--	--	K11262 acetyl-CoA carboxylase / biotin carboxylase 1 [EC:6.4.1.2 6.3.4.14 2.1.3.15] | (GenBank) acetyl-CoA carboxylase (A)	ko00061: Fatty acid biosynthesis; ko00254: Aflatoxin biosynthesis; ko00620: Pyruvate metabolism; ko00640: Propanoate metabolism; ko01100: Metabolic pathways; ko01110: Biosynthesis of secondary metabolites; ko01212: Fatty acid metabolism	XP_013460845.1	ACC1_ARATH RecName: Full=Acetyl-CoA carboxylase 1; Short=AtACC1; EC=6.4.1.2 {ECO:0000269|PubMed:9008389}; AltName: Full=Protein EMBRYO DEFECTIVE 22; AltName: Full=Protein GURKE; AltName: Full=Protein PASTICCINO 3; Includes: RecName: Full=Biotin carboxylase; EC=6.3.4.14;	At1g36160	GO:0005829,cytosol; GO:0005634,nucleus; GO:0005886,plasma membrane; GO:0003989,acetyl-CoA carboxylase activity; GO:0005524,ATP binding; GO:0004075,biotin carboxylase activity; GO:0046872,metal ion binding; GO:0009793,embryo development ending in seed dormancy; GO:0030497,fatty acid elongation; GO:2001295,malonyl-CoA biosynthetic process; GO:0009933,meristem structural organization; GO:0010072,pri…	PF08326.12:Acetyl-CoA carboxylase, central region	--	--	--
MS.gene008353	0	0.61	0	1.21	0.21	2.04	13.41	11.02	56.42	4.62	2.19	0.48	0	3	0	6	1	10	61	54	262	21	11	2	chr3.1	53756022	53756742	+	--	--	--	--	XP_003600619.2	--	At5g56550	--	--	--	--	--
MS.gene00837	0.2	2.91	13.56	0.73	3.05	0	0	0.37	0.39	0	1.43	0	1	16	82	4	16	0	0	2	2	0	8	0	chr2.3	65018766	65019428	-	--	--	--	--	XP_013462812.1	--	At1g11700	--	PF04520.13:Senescence regulator	--	--	--
MS.gene008424	4.54	3.08	5.97	4.78	10.42	9.56	14.84	47.56	16.02	46.56	32.82	43.4	41	31	66	48	100	95	137	473	151	430	335	366	chr3.3	56864209	56869039	-	--	--	K14709 solute carrier family 39 (zinc transporter), member 1/2/3 | (GenBank) ZIP zinc/iron transport family protein (A)	--	XP_003600559.1	MTP4_ORYSJ RecName: Full=Metal tolerance protein 4; Short=OsMTP4;	At3g58060	GO:0016021,integral component of membrane; GO:0016020,membrane; GO:0005774,vacuolar membrane; GO:0008324,cation transmembrane transporter activity; GO:0005384,manganese ion transmembrane transporter activity; GO:0003674,molecular_function; GO:0005215,transporter activity; GO:0022857,transmembrane transporter activity; GO:0015075,ion transmembrane transporter activity; GO:0046873,metal ion transme…	PF01545.21:Cation efflux family	--	--	--
MS.gene008425	5.82	0.28	3	3.86	102.08	16.71	26.08	32.83	7.92	163.89	19.52	3.94	19	1	12	14	354	60	87	118	27	547	72	12	chr3.3	56862382	56863438	+	--	--	K02866 large subunit ribosomal protein L10e | (GenBank) 60S ribosomal protein L10-2 (A)	ko03010: Ribosome	XP_003600557.1	RL10_VITRI RecName: Full=60S ribosomal protein L10; AltName: Full=QM protein homolog;	At1g26910	GO:0005840,ribosome; GO:0003735,structural constituent of ribosome; GO:0006412,translation; GO:0003674,molecular_function; GO:0005198,structural molecule activity; GO:0008152,metabolic process; GO:0006518,peptide metabolic process; GO:0006807,nitrogen compound metabolic process; GO:0008150,biological_process; GO:0009058,biosynthetic process; GO:0009059,macromolecule biosynthetic process; GO:00099…	PF00252.18:Ribosomal protein L16p/L10e	--	--	--
MS.gene008426	6.04	6.28	3.08	2.26	17.05	9.29	20.08	11.97	13.16	59.39	29.74	39.34	120	139	75	50	360	203	408	262	273	1207	668	730	chr3.3	56853889	56860557	+	--	--	K16224 senescence-induced receptor-like serine/threonine-protein kinase | (RefSeq) senescence-induced receptor-like serine/threonine-protein kinase (A)	ko04016: MAPK signaling pathway - plant; ko04626: Plant-pathogen interaction	XP_003600556.1	Y1684_ARATH RecName: Full=Probable LRR receptor-like serine/threonine-protein kinase At1g06840; EC=2.7.11.1; Flags: Precursor;	At1g06840	GO:0016021,integral component of membrane; GO:0005886,plasma membrane; GO:0005524,ATP binding; GO:0106310,NA; GO:0106311,NA; GO:0000166,nucleotide binding; GO:0003674,molecular_function; GO:0005488,binding; GO:0008144,drug binding; GO:0017076,purine nucleotide binding; GO:0030554,adenyl nucleotide binding; GO:0032553,ribonucleotide binding; GO:0032555,purine ribonucleotide binding; GO:0032559,ade…	PF00069.25:Protein kinase domain	--	--	--
MS.gene008454	3.96	9.15	4.63	104.9	90.86	85.46	29.36	97.45	82.72	46.79	106.48	104.3	14	36	20	412	341	332	106	379	305	169	425	344	chr3.3	56216319	56217940	+	--	--	K00799 glutathione S-transferase [EC:2.5.1.18] | (GenBank) glutathione S-transferase, amino-terminal domain protein (A)	ko00480: Glutathione metabolism; ko01100: Metabolic pathways	XP_013460469.1	GSTXA_TOBAC RecName: Full=Probable glutathione S-transferase parA; EC=2.5.1.18; AltName: Full=Auxin-regulated protein parA; AltName: Full=STR246C protein;	At1g17180	GO:0005737,cytoplasm; GO:0004364,glutathione transferase activity; GO:0009734,auxin-activated signaling pathway; GO:0006749,glutathione metabolic process; GO:0003674,molecular_function; GO:0003824,catalytic activity; GO:0016740,transferase activity; GO:0016765,transferase activity, transferring alkyl or aryl (other than methyl) groups; GO:0007165,signal transduction; GO:0007154,cell communication…	PF13410.6:Glutathione S-transferase, C-terminal domain	--	--	--
MS.gene008455	2.78	2.68	2.27	21.99	12.16	9.76	7.2	24.19	25.9	28.38	42.58	26.83	14	15	14	123	65	54	37	134	136	146	242	126	chr3.3	56212548	56214668	+	--	--	K00799 glutathione S-transferase [EC:2.5.1.18] | (GenBank) glutathione S-transferase, amino-terminal domain protein (A)	ko00480: Glutathione metabolism; ko01100: Metabolic pathways	XP_013460469.1	GSTXA_TOBAC RecName: Full=Probable glutathione S-transferase parA; EC=2.5.1.18; AltName: Full=Auxin-regulated protein parA; AltName: Full=STR246C protein;	At1g17180	GO:0005737,cytoplasm; GO:0004364,glutathione transferase activity; GO:0009734,auxin-activated signaling pathway; GO:0006749,glutathione metabolic process; GO:0003674,molecular_function; GO:0003824,catalytic activity; GO:0016740,transferase activity; GO:0016765,transferase activity, transferring alkyl or aryl (other than methyl) groups; GO:0007165,signal transduction; GO:0007154,cell communication…	PF02798.20:Glutathione S-transferase, N-terminal domain	--	--	--
MS.gene008456	4.97	8.03	5.2	12.52	14.03	11.57	31.12	76.37	112.56	148.92	115.59	96.66	25	45	32	70	75	64	160	423	591	766	657	454	chr3.3	56207641	56209110	+	--	--	K00799 glutathione S-transferase [EC:2.5.1.18] | (GenBank) glutathione S-transferase, amino-terminal domain protein (A)	ko00480: Glutathione metabolism; ko01100: Metabolic pathways	XP_013460468.1	GSTXA_TOBAC RecName: Full=Probable glutathione S-transferase parA; EC=2.5.1.18; AltName: Full=Auxin-regulated protein parA; AltName: Full=STR246C protein;	At1g17180	GO:0005737,cytoplasm; GO:0004364,glutathione transferase activity; GO:0009734,auxin-activated signaling pathway; GO:0006749,glutathione metabolic process; GO:0003674,molecular_function; GO:0003824,catalytic activity; GO:0016740,transferase activity; GO:0016765,transferase activity, transferring alkyl or aryl (other than methyl) groups; GO:0007165,signal transduction; GO:0007154,cell communication…	PF02798.20:Glutathione S-transferase, N-terminal domain	--	--	--
MS.gene008460	4.71	2.62	2.19	3.36	2.37	2.88	11.04	6.27	18.43	3.89	7.54	21.21	58	36	33	46	31	39	139	85	237	49	105	244	chr3.3	56169325	56172092	-	--	--	K18875 enhanced disease susceptibility 1 protein | (RefSeq) protein EDS1-like (A)	ko04626: Plant-pathogen interaction	XP_013460462.1	SG101_ARATH RecName: Full=Senescence-associated carboxylesterase 101; EC=3.1.1.1; Flags: Precursor;	At5g14930	GO:0005737,cytoplasm; GO:0016021,integral component of membrane; GO:0005634,nucleus; GO:0052689,carboxylic ester hydrolase activity; GO:0080030,methyl indole-3-acetate esterase activity; GO:0007568,aging; GO:0050829,defense response to Gram-negative bacterium; GO:0060866,leaf abscission; GO:0016042,lipid catabolic process; GO:1900426,positive regulation of defense response to bacterium; GO:190229…	PF18117.1:Enhanced disease susceptibility 1 protein EP domain	--	--	--
MS.gene008463	5.94	5.69	3.04	3.13	1.94	2.16	26.26	12.65	11.68	10.76	9.39	11.79	75	80	47	44	26	30	339	176	154	139	134	139	chr3.3	56060576	56063111	+	--	--	K18875 enhanced disease susceptibility 1 protein | (RefSeq) protein EDS1B-like (A)	ko04626: Plant-pathogen interaction	XP_004500367.1	SG101_ARATH RecName: Full=Senescence-associated carboxylesterase 101; EC=3.1.1.1; Flags: Precursor;	At5g14930	GO:0005737,cytoplasm; GO:0016021,integral component of membrane; GO:0005634,nucleus; GO:0052689,carboxylic ester hydrolase activity; GO:0080030,methyl indole-3-acetate esterase activity; GO:0007568,aging; GO:0050829,defense response to Gram-negative bacterium; GO:0060866,leaf abscission; GO:0016042,lipid catabolic process; GO:1900426,positive regulation of defense response to bacterium; GO:190229…	PF18117.1:Enhanced disease susceptibility 1 protein EP domain	--	--	--
MS.gene008509	0.94	2.86	1.3	0.93	2.03	1.45	0.37	0	0	0	0.08	0	10	34	17	11	23	17	4	0	0	0	1	0	chr3.3	55152812	55154242	-	--	--	--	--	XP_013460423.1	Y3720_ARATH RecName: Full=UPF0481 protein At3g47200;	At3g50180	GO:0016021,integral component of membrane; GO:0005886,plasma membrane; GO:0005575,cellular_component; GO:0016020,membrane; GO:0031224,intrinsic component of membrane; GO:0044425,membrane part; GO:0005623,cell; GO:0044464,cell part; GO:0071944,cell periphery	PF03140.15:Plant protein of unknown function	--	--	--
MS.gene008521	0.84	1.25	1.22	0	0.88	0.08	0	0.08	0	0.27	0.33	0	9	15	16	0	10	1	0	1	0	3	4	0	chr3.3	54875281	54876723	+	--	--	--	--	XP_013442893.1	Y3720_ARATH RecName: Full=UPF0481 protein At3g47200;	At2g36430	GO:0016021,integral component of membrane; GO:0005886,plasma membrane; GO:0005575,cellular_component; GO:0016020,membrane; GO:0031224,intrinsic component of membrane; GO:0044425,membrane part; GO:0005623,cell; GO:0044464,cell part; GO:0071944,cell periphery	PF03140.15:Plant protein of unknown function	--	--	--
MS.gene008564	0.63	1.3	0.44	0.69	0.77	0.25	0.13	0.08	0.09	0.27	0.64	3.01	14	32	12	17	18	6	3	2	2	6	16	62	chr3.3	54125605	54132608	+	--	--	--	--	XP_013460383.1	TI110_PEA RecName: Full=Protein TIC110, chloroplastic; AltName: Full=Chloroplast inner envelope protein, 110 kDa; Short=psIEP110; AltName: Full=IAP100; AltName: Full=Translocon at the inner envelope membrane of chloroplasts 110; Flags: Precursor;	At1g06950	GO:0009706,chloroplast inner membrane; GO:0016021,integral component of membrane; GO:0015031,protein transport; GO:0008104,protein localization; GO:0006810,transport; GO:0008150,biological_process; GO:0015833,peptide transport; GO:0033036,macromolecule localization; GO:0042886,amide transport; GO:0045184,establishment of protein localization; GO:0051179,localization; GO:0051234,establishment of l…	PF16940.5:Chloroplast envelope transporter	--	--	--
MS.gene008631	3.63	5.64	2.57	62.9	9.51	6.6	3.93	8.37	10.06	13.53	3.13	9.14	37	64	32	713	103	74	41	94	107	141	36	87	chr3.4	60648066	60656108	-	--	--	K08059 interferon, gamma-inducible protein 30 | (GenBank) gamma interferon inducible lysosomal thiol reductase (A)	--	KFK43004.1	GILT_ARATH RecName: Full=Gamma-interferon-responsive lysosomal thiol protein {ECO:0000303|PubMed:21052676}; Short=AtGILT {ECO:0000303|PubMed:21052676}; Flags: Precursor;	At1g07080	GO:0005576,extracellular region; GO:0005764,lysosome; GO:0016491,oxidoreductase activity; GO:0003674,molecular_function; GO:0003824,catalytic activity; GO:0005575,cellular_component; GO:0005622,intracellular; GO:0000323,lytic vacuole; GO:0005773,vacuole; GO:0005623,cell; GO:0005737,cytoplasm; GO:0043231,intracellular membrane-bounded organelle; GO:0043226,organelle; GO:0043227,membrane-bounded or…	PF03227.16:Gamma interferon inducible lysosomal thiol reductase (GILT)	--	--	--
MS.gene00867	0.94	4.24	4.78	43.79	68.39	10.81	41.17	192.32	69.97	78.26	82.68	117.24	5	25	31	258	385	63	223	1122	387	424	495	580	chr2.3	65403060	65409201	-	--	--	K01953 asparagine synthase (glutamine-hydrolysing) [EC:6.3.5.4] | (RefSeq) asparagine synthetase [glutamine-hydrolyzing] 2-like (A)	ko00250: Alanine, aspartate and glutamate metabolism; ko01100: Metabolic pathways; ko01110: Biosynthesis of secondary metabolites; ko01230: Biosynthesis of amino acids	XP_013462754.1	TSJT1_TOBAC RecName: Full=Stem-specific protein TSJT1;	At5g19140	--	PF12481.8:Aluminium induced protein	--	--	--
MS.gene00868	0.31	5.7	19.81	10.2	66.38	10.03	22.8	226.65	78.23	68.87	92.79	83.89	3	61	233	109	678	106	224	2399	785	677	1008	753	chr2.3	65447530	65448819	+	--	--	K22683 aspartyl protease family protein [EC:3.4.23.-] | (RefSeq) aspartyl protease family protein 2-like (A)	--	XP_013462752.1	GIP2_NICBE RecName: Full=Probable aspartic proteinase GIP2 {ECO:0000305}; EC=3.4.23.- {ECO:0000305}; AltName: Full=Glucanase inhibitor protein 2 {ECO:0000303|PubMed:28082413}; Short=NbGIP2 {ECO:0000303|PubMed:28082413}; Flags: Precursor;	At1g03230	GO:0048046,apoplast; GO:0004190,aspartic-type endopeptidase activity; GO:0006952,defense response; GO:0003674,molecular_function; GO:0003824,catalytic activity; GO:0004175,endopeptidase activity; GO:0008233,peptidase activity; GO:0070011,peptidase activity, acting on L-amino acid peptides; GO:0016787,hydrolase activity; GO:0070001,aspartic-type peptidase activity; GO:0140096,catalytic activity, a…	PF14541.6:Xylanase inhibitor C-terminal	--	--	--
MS.gene00870	0.31	1.77	4	1.96	7.15	2.27	9.26	50.54	24.32	24.92	17.77	43	3	19	47	21	73	24	91	535	244	245	193	386	chr2.3	65475860	65477149	+	--	--	K22683 aspartyl protease family protein [EC:3.4.23.-] | (RefSeq) protein ASPARTIC PROTEASE IN GUARD CELL 1 (A)	--	XP_013462751.1	GIP2_NICBE RecName: Full=Probable aspartic proteinase GIP2 {ECO:0000305}; EC=3.4.23.- {ECO:0000305}; AltName: Full=Glucanase inhibitor protein 2 {ECO:0000303|PubMed:28082413}; Short=NbGIP2 {ECO:0000303|PubMed:28082413}; Flags: Precursor;	At1g03230	GO:0048046,apoplast; GO:0004190,aspartic-type endopeptidase activity; GO:0006952,defense response; GO:0003674,molecular_function; GO:0003824,catalytic activity; GO:0004175,endopeptidase activity; GO:0008233,peptidase activity; GO:0070011,peptidase activity, acting on L-amino acid peptides; GO:0016787,hydrolase activity; GO:0070001,aspartic-type peptidase activity; GO:0140096,catalytic activity, a…	PF14541.6:Xylanase inhibitor C-terminal	--	--	--
MS.gene008718	20.52	16.21	30.52	6.27	22.79	290.67	19.27	26.46	13.76	5.22	7.63	0	50	44	91	17	59	779	48	71	35	13	21	0	chr4.4	25225152	25226216	+	--	--	K01738 cysteine synthase [EC:2.5.1.47] | (GenBank) O-acetylserine (thiol) lyase (A)	ko00270: Cysteine and methionine metabolism; ko00920: Sulfur metabolism; ko01100: Metabolic pathways; ko01110: Biosynthesis of secondary metabolites; ko01200: Carbon metabolism; ko01230: Biosynthesis of amino acids	XP_003608087.1	CYSKM_ARATH RecName: Full=Cysteine synthase, mitochondrial; EC=2.5.1.47; AltName: Full=Beta-substituted Ala synthase 2;2; Short=ARAth-Bsas2;2; AltName: Full=CSase C; Short=AtCS-C; Short=CS-C; AltName: Full=O-acetylserine (thiol)-lyase; AltName: Full=O-acetylserine sulfhydrylase; AltName: Full=OAS-TL C; Flags: Precursor;	At3g59760	GO:0005737,cytoplasm; GO:0005739,mitochondrion; GO:0004124,cysteine synthase activity; GO:0042802,identical protein binding; GO:0030170,pyridoxal phosphate binding; GO:0006535,cysteine biosynthetic process from serine; GO:0009567,double fertilization forming a zygote and endosperm; GO:0009860,pollen tube growth; GO:0003674,molecular_function; GO:0003824,catalytic activity; GO:0016740,transferase …	PF00291.25:Pyridoxal-phosphate dependent enzyme	--	--	--
MS.gene00873	14.34	23.14	16.49	21.43	45.07	27.63	69.92	39.3	172.8	71.56	93.8	120.54	59	106	83	98	197	125	294	178	742	301	436	463	chr2.3	65515107	65515658	-	--	--	K22683 aspartyl protease family protein [EC:3.4.23.-] | (RefSeq) Eukaryotic aspartyl protease family protein (A)	--	XP_013462750.1	GIP2_NICBE RecName: Full=Probable aspartic proteinase GIP2 {ECO:0000305}; EC=3.4.23.- {ECO:0000305}; AltName: Full=Glucanase inhibitor protein 2 {ECO:0000303|PubMed:28082413}; Short=NbGIP2 {ECO:0000303|PubMed:28082413}; Flags: Precursor;	At1g03220	GO:0048046,apoplast; GO:0004190,aspartic-type endopeptidase activity; GO:0006952,defense response; GO:0003674,molecular_function; GO:0003824,catalytic activity; GO:0004175,endopeptidase activity; GO:0008233,peptidase activity; GO:0070011,peptidase activity, acting on L-amino acid peptides; GO:0016787,hydrolase activity; GO:0070001,aspartic-type peptidase activity; GO:0140096,catalytic activity, a…	PF14541.6:Xylanase inhibitor C-terminal	--	--	--
MS.gene008736	6.62	5.94	1.12	11.08	4.94	2.91	13.17	81.04	80.24	232.11	125.42	83.1	29	29	6	54	23	14	59	391	367	1040	621	340	chr4.4	25456727	25458274	+	--	--	--	--	AFK38978.1	MEE14_ARATH RecName: Full=CCG-binding protein 1; Short=AtCBP1 {ECO:0000303|PubMed:26462908}; AltName: Full=Protein MATERNAL EFFECT EMBRYO ARREST 14 {ECO:0000305};	At2g15890	GO:0009507,chloroplast; GO:0005829,cytosol; GO:0005634,nucleus; GO:0036033,mediator complex binding; GO:0071456,cellular response to hypoxia; GO:0050832,defense response to fungus; GO:0009793,embryo development ending in seed dormancy; GO:0010183,pollen tube guidance; GO:0003674,molecular_function; GO:0005488,binding; GO:0044877,protein-containing complex binding; GO:0001666,response to hypoxia; …	--	--	--	--
MS.gene008740	32.92	26.51	16.02	17.85	21.64	17.71	13.03	5.59	7.22	6.64	7.89	3.9	262	235	156	158	183	155	106	49	60	54	71	29	chr4.4	25491968	25493789	+	--	--	K24028 salicylic acid 3-hydroxylase [EC:1.14.11.-] | (RefSeq) protein DMR6-LIKE OXYGENASE 2-like (A)	--	XP_003608050.1	GAOX1_ARATH RecName: Full=Gibberellin 20 oxidase 1; EC=1.14.11.-; AltName: Full=GA 20-oxidase 1; Short=AtGA20ox1; AltName: Full=Gibberellin C-20 oxidase 1;	At3g19000	GO:0005737,cytoplasm; GO:0051213,dioxygenase activity; GO:0045544,gibberellin 20-oxidase activity; GO:0046872,metal ion binding; GO:0009908,flower development; GO:0009740,gibberellic acid mediated signaling pathway; GO:0009686,gibberellin biosynthetic process; GO:0048366,leaf development; GO:0009739,response to gibberellin; GO:0009416,response to light stimulus; GO:0048575,short-day photoperiodis…	PF14226.6:non-haem dioxygenase in morphine synthesis N-terminal	--	--	--
MS.gene008742	2.21	0.8	2.17	280.81	196.12	189.67	10.4	70.59	10.82	202.47	350.97	34.86	10	4	12	1410	941	942	48	351	51	935	1791	147	chr4.4	25523530	25525811	+	--	--	K05278 flavonol synthase [EC:1.14.20.6] | (RefSeq) flavonol synthase/flavanone 3-hydroxylase-like (A)	ko00941: Flavonoid biosynthesis; ko01100: Metabolic pathways; ko01110: Biosynthesis of secondary metabolites	XP_003608047.1	DMR6_ARATH RecName: Full=Protein DOWNY MILDEW RESISTANCE 6 {ECO:0000303|PubMed:15986928}; Short=AtDMR6 {ECO:0000303|PubMed:15986928}; EC=1.14.11.- {ECO:0000255|PROSITE-ProRule:PRU00805}; AltName: Full=2-oxoglutarate (2OG)-Fe(II) oxygenase-like protein DMR6 {ECO:0000303|PubMed:18248595}; AltName: Full=Salicylate 3-hydroxylase DMR6 {ECO:0000305}; Short=S3H DMR6 {ECO:0000305}; Short=SA 3-hydroxylase…	At3g19000	GO:0051213,dioxygenase activity; GO:0033759,flavone synthase activity; GO:0046872,metal ion binding; GO:0034785,salicylate 5-hydroxylase activity; GO:0071456,cellular response to hypoxia; GO:0042742,defense response to bacterium; GO:0002229,defense response to oomycetes; GO:0009813,flavonoid biosynthetic process; GO:0010150,leaf senescence; GO:0009617,response to bacterium; GO:0009620,response to…	PF14226.6:non-haem dioxygenase in morphine synthesis N-terminal	--	--	--
MS.gene008743	0	0.4	0.92	0	0.21	0	0	0	0	1.98	4.18	13.96	0	2	5	0	1	0	0	0	0	9	21	58	chr4.4	25534621	25536800	+	--	--	K14442 ATP-dependent RNA helicase DHX36 [EC:3.6.4.13] | (GenBank) ATP-dependent RNA helicase DHX36-like protein (A)	ko03018: RNA degradation	XP_003631052.2	DEXH3_ARATH RecName: Full=DExH-box ATP-dependent RNA helicase DExH3 {ECO:0000305}; EC=3.6.4.13 {ECO:0000305};	At1g48650	GO:0005524,ATP binding; GO:0016787,hydrolase activity; GO:0003723,RNA binding; GO:0003724,RNA helicase activity; GO:0000166,nucleotide binding; GO:0003674,molecular_function; GO:0005488,binding; GO:0008144,drug binding; GO:0017076,purine nucleotide binding; GO:0030554,adenyl nucleotide binding; GO:0032553,ribonucleotide binding; GO:0032555,purine ribonucleotide binding; GO:0032559,adenyl ribonucl…	PF00271.31:Helicase conserved C-terminal domain	--	--	--
MS.gene008746	0	0	0	0	2.26	0	0	21.04	1.53	19.53	34.64	27.37	0	0	0	0	3	0	0	29	2	25	49	32	chr4.4	25557663	25557830	-	--	--	--	--	XP_003608044.1	--	--	--	--	--	--	--
MS.gene00875	0.71	1.46	3.16	4.02	11.86	10.45	13.82	0.74	6.04	2.29	10.08	13.72	7	16	38	44	124	113	139	8	62	23	112	126	chr2.3	65526924	65528243	-	--	--	K22683 aspartyl protease family protein [EC:3.4.23.-] | (RefSeq) aspartic proteinase nepenthesin-2 (A)	--	XP_013462745.1	GIP2_NICBE RecName: Full=Probable aspartic proteinase GIP2 {ECO:0000305}; EC=3.4.23.- {ECO:0000305}; AltName: Full=Glucanase inhibitor protein 2 {ECO:0000303|PubMed:28082413}; Short=NbGIP2 {ECO:0000303|PubMed:28082413}; Flags: Precursor;	At1g03220	GO:0048046,apoplast; GO:0004190,aspartic-type endopeptidase activity; GO:0006952,defense response; GO:0003674,molecular_function; GO:0003824,catalytic activity; GO:0004175,endopeptidase activity; GO:0008233,peptidase activity; GO:0070011,peptidase activity, acting on L-amino acid peptides; GO:0016787,hydrolase activity; GO:0070001,aspartic-type peptidase activity; GO:0140096,catalytic activity, a…	PF14541.6:Xylanase inhibitor C-terminal	--	--	--
MS.gene00876	13.39	12.77	12.21	15.68	41.9	28.88	67.21	28.18	43.65	10.86	42.71	21.79	129	137	144	168	429	306	662	299	439	107	465	196	chr2.3	65531910	65533202	-	--	--	K22683 aspartyl protease family protein [EC:3.4.23.-] | (RefSeq) protein ASPARTIC PROTEASE IN GUARD CELL 1-like (A)	--	XP_013462742.1	GIP2_NICBE RecName: Full=Probable aspartic proteinase GIP2 {ECO:0000305}; EC=3.4.23.- {ECO:0000305}; AltName: Full=Glucanase inhibitor protein 2 {ECO:0000303|PubMed:28082413}; Short=NbGIP2 {ECO:0000303|PubMed:28082413}; Flags: Precursor;	At1g03220	GO:0048046,apoplast; GO:0004190,aspartic-type endopeptidase activity; GO:0006952,defense response; GO:0003674,molecular_function; GO:0003824,catalytic activity; GO:0004175,endopeptidase activity; GO:0008233,peptidase activity; GO:0070011,peptidase activity, acting on L-amino acid peptides; GO:0016787,hydrolase activity; GO:0070001,aspartic-type peptidase activity; GO:0140096,catalytic activity, a…	PF14541.6:Xylanase inhibitor C-terminal	--	--	--
MS.gene008763	0	0.07	0	1.8	1.88	0.84	2.78	2.16	3.46	0.68	1.97	1.48	0	1	0	26	26	12	37	31	47	9	29	18	chr4.4	25802233	25806971	+	--	--	K13220 WW domain-binding protein 4 | (GenBank) nucleic acid-binding protein (A)	--	XP_003608021.1	ZOP1_ARATH RecName: Full=Zinc finger protein ZOP1 {ECO:0000305}; AltName: Full=Zinc-finger and OCRE domain-containing protein 1 {ECO:0000303|PubMed:23524848};	At1g49590	GO:0015030,Cajal body; GO:0071011,precatalytic spliceosome; GO:0003690,double-stranded DNA binding; GO:0003725,double-stranded RNA binding; GO:0003723,RNA binding; GO:0008270,zinc ion binding; GO:0080188,RNA-directed DNA methylation; GO:0000398,mRNA splicing, via spliceosome; GO:0008380,RNA splicing; GO:0009845,seed germination; GO:0003674,molecular_function; GO:0003676,nucleic acid binding; GO:0…	PF06220.12:U1 zinc finger	--	--	--
MS.gene008892	0.15	0	0	3.94	0.84	2.03	1.24	0.47	0.78	0.87	0.59	0	2	0	0	59	12	30	17	7	11	12	9	0	chr8.1	35968037	35971002	-	--	--	--	--	XP_003628937.2	Y1790_ARATH RecName: Full=BTB/POZ domain-containing protein At1g67900;	At1g67900	GO:0016567,protein ubiquitination; GO:0008152,metabolic process; GO:0006464,cellular protein modification process; GO:0006807,nitrogen compound metabolic process; GO:0008150,biological_process; GO:0009987,cellular process; GO:0019538,protein metabolic process; GO:0032446,protein modification by small protein conjugation; GO:0036211,protein modification process; GO:0043170,macromolecule metabolic …	PF03000.14:NPH3 family	--	--	--
MS.gene008894	1.81	5.43	0	36.97	19.91	11.54	42.58	126.81	35.9	29.56	33.17	442.8	3	10	0	68	35	21	72	231	62	50	62	684	chr8.2	33795846	33796236	+	--	--	--	--	ACJ84100.1	--	--	--	--	--	--	--
MS.gene008911	0.27	0.24	0.22	4.66	1.03	6.7	1.07	0.37	0	0	0.6	0	2	2	2	38	8	54	8	3	0	0	5	0	chr8.2	34125194	34128848	-	--	--	K10703 very-long-chain (3R)-3-hydroxyacyl-CoA dehydratase [EC:4.2.1.134] | (GenBank) 3-hydroxyacyl-CoA dehydratase (A)	ko00062: Fatty acid elongation; ko01040: Biosynthesis of unsaturated fatty acids; ko01100: Metabolic pathways; ko01110: Biosynthesis of secondary metabolites; ko01212: Fatty acid metabolism	XP_013446112.1	HACDA_ORYSJ RecName: Full=Very-long-chain (3R)-3-hydroxyacyl-CoA dehydratase PASTICCINO 2A {ECO:0000305}; EC=4.2.1.134 {ECO:0000250|UniProtKB:Q8VZB2}; AltName: Full=3-hydroxyacyl-CoA dehydratase PASTICCINO 2A; Short=HACD; Short=PAS2A; AltName: Full=Protein tyrosine phosphatase-like protein;	At5g10480	GO:0030176,integral component of endoplasmic reticulum membrane; GO:0102343,3-hydroxy-arachidoyl-CoA dehydratase activity; GO:0102344,3-hydroxy-behenoyl-CoA dehydratase activity; GO:0102345,3-hydroxy-lignoceroyl-CoA dehydratase activity; GO:0018812,3-hydroxyacyl-CoA dehydratase activity; GO:0102158,very-long-chain 3-hydroxyacyl-CoA dehydratase activity; GO:0030497,fatty acid elongation; GO:000727…	PF04387.14:Protein tyrosine phosphatase-like protein, PTPLA	--	--	--
MS.gene008949	118.77	96.39	116.35	162.63	77.48	100.12	30.17	45.38	15.59	5.03	17.69	11.11	1248	1128	1496	1900	865	1157	324	525	171	54	210	109	chr8.2	34644615	34646024	+	--	--	K18823 soyasaponin III rhamnosyltransferase [EC:2.4.1.273] | (RefSeq) soyasaponin III rhamnosyltransferase (A)	--	XP_013446076.1	U91A1_ARATH RecName: Full=UDP-glycosyltransferase 91A1; EC=2.4.1.-;	At2g22590	GO:0043231,intracellular membrane-bounded organelle; GO:0008194,UDP-glycosyltransferase activity; GO:0003674,molecular_function; GO:0003824,catalytic activity; GO:0016740,transferase activity; GO:0016757,transferase activity, transferring glycosyl groups; GO:0005622,intracellular; GO:0005575,cellular_component; GO:0005623,cell; GO:0043226,organelle; GO:0043227,membrane-bounded organelle; GO:00432…	PF00201.18:UDP-glucoronosyl and UDP-glucosyl transferase	--	--	--
MS.gene008970	0	0	0	0	0.19	0.19	0.07	6.54	1.05	0	0	0	0	0	0	0	3	3	1	105	16	0	0	0	chr8.2	35021218	35023173	+	--	--	K22133 oxalate---CoA ligase [EC:6.2.1.8] | (RefSeq) oxalate--CoA ligase (A)	ko00630: Glyoxylate and dicarboxylate metabolism; ko01100: Metabolic pathways	XP_013446070.1	LRK91_ARATH RecName: Full=L-type lectin-domain containing receptor kinase IX.1 {ECO:0000303|PubMed:19773388}; Short=LecRK-IX.1 {ECO:0000303|PubMed:19773388}; EC=2.7.11.1 {ECO:0000255|PROSITE-ProRule:PRU00159}; Flags: Precursor;	At5g10530	GO:0016021,integral component of membrane; GO:0005886,plasma membrane; GO:0005524,ATP binding; GO:0030246,carbohydrate binding; GO:0106310,NA; GO:0106311,NA; GO:0004675,transmembrane receptor protein serine/threonine kinase activity; GO:0042742,defense response to bacterium; GO:0002229,defense response to oomycetes; GO:0010942,positive regulation of cell death; GO:0010726,positive regulation of h…	PF00139.19:Legume lectin domain	--	--	--
MS.gene009006	0.6	0.68	0.37	4.2	13.18	4.11	0.15	0.41	1.15	0.15	0	0	4	5	3	31	93	30	1	3	8	1	0	0	chr8.2	35836471	35837361	-	--	--	--	--	XP_003628799.1	--	--	GO:0016021,integral component of membrane; GO:0005575,cellular_component; GO:0016020,membrane; GO:0031224,intrinsic component of membrane; GO:0044425,membrane part	--	--	--	--
MS.gene009009	0	4.77	1.55	15	14.98	8.1	9.64	25.3	13.07	2.78	1.51	0.2	0	28	10	88	84	47	52	147	72	15	9	1	chr8.2	35918983	35921509	+	--	--	--	--	XP_003628796.1	RITF1_ARATH RecName: Full=Protein RGF1 INDUCIBLE TRANSCRIPTION FACTOR 1 {ECO:0000303|PubMed:31801996};	At4g17900	GO:0005634,nucleus; GO:0046872,metal ion binding; GO:0010078,maintenance of root meristem identity; GO:2000377,regulation of reactive oxygen species metabolic process; GO:2000280,regulation of root development; GO:0043434,response to peptide hormone; GO:0003674,molecular_function; GO:0005488,binding; GO:0043167,ion binding; GO:0043169,cation binding; GO:0007275,multicellular organism development;…	PF04640.14:PLATZ transcription factor	PLATZ	TF	PLATZ
MS.gene00901	17.39	24.05	11.46	554.89	266.72	198.9	56.24	309.46	145.88	901.05	974.85	2329.61	124	191	100	4400	2021	1560	410	2430	1086	6571	7856	15513	chr2.3	65851031	65851987	-	--	--	--	--	XP_003594125.1	--	At1g55230	GO:0016021,integral component of membrane; GO:0005575,cellular_component; GO:0016020,membrane; GO:0031224,intrinsic component of membrane; GO:0044425,membrane part	PF04819.12:Family of unknown function (DUF716)	--	--	--
MS.gene009017	2.87	4.83	3.42	4.84	2.03	7.5	8.31	19.23	16.96	12.75	6.03	28.31	24	45	35	45	18	69	71	177	148	109	57	221	chr8.2	36011365	36012486	+	--	--	K00913 inositol-1,3,4-trisphosphate 5/6-kinase / inositol-tetrakisphosphate 1-kinase [EC:2.7.1.159 2.7.1.134] | (GenBank) inositol 1,3,4-trisphosphate 5/6-kinase (A)	ko00562: Inositol phosphate metabolism; ko01100: Metabolic pathways; ko04070: Phosphatidylinositol signaling system	XP_003628787.1	ITPK5_ORYSI RecName: Full=Inositol-tetrakisphosphate 1-kinase 5 {ECO:0000305}; EC=2.7.1.134 {ECO:0000305}; AltName: Full=Inositol 1,3,4-trisphosphate 5/6-kinase 5 {ECO:0000305}; Short=Inositol-triphosphate 5/6-kinase 5 {ECO:0000305}; Short=Ins(1,3,4)P(3) 5/6-kinase 5 {ECO:0000305}; Short=OsITP5/6K-5 {ECO:0000305}; Short=OsITPK5 {ECO:0000305}; EC=2.7.1.159 {ECO:0000305};	At5g16760	GO:0005524,ATP binding; GO:0047325,inositol tetrakisphosphate 1-kinase activity; GO:0052726,inositol-1,3,4-trisphosphate 5-kinase activity; GO:0052725,inositol-1,3,4-trisphosphate 6-kinase activity; GO:0000287,magnesium ion binding; GO:0032957,inositol trisphosphate metabolic process; GO:0000166,nucleotide binding; GO:0003674,molecular_function; GO:0005488,binding; GO:0008144,drug binding; GO:001…	PF05770.11:Inositol 1,3,4-trisphosphate 5/6-kinase ATP-grasp domain	--	--	--
MS.gene009050	5.13	7.8	7.45	18.06	17.97	12.56	18.4	54.08	39.85	49.04	25.59	0	36	61	64	141	134	97	132	418	292	352	203	0	chr8.2	36432003	36436491	+	--	--	K09716 D-aminoacyl-tRNA deacylase [EC:3.1.1.96] | (GenBank) D-aminoacyl-tRNA deacylase (A)	--	XP_003628728.2	GEK1_ARATH RecName: Full=D-aminoacyl-tRNA deacylase {ECO:0000303|PubMed:17251192}; EC=3.1.1.96 {ECO:0000269|PubMed:17251192}; AltName: Full=Ethanol tolerance protein GEKO1;	At2g03800	GO:0005829,cytosol; GO:0005634,nucleus; GO:0051499,D-aminoacyl-tRNA deacylase activity; GO:0046872,metal ion binding; GO:0019478,D-amino acid catabolic process; GO:0002161,aminoacyl-tRNA editing activity; GO:0003674,molecular_function; GO:0003824,catalytic activity; GO:0016787,hydrolase activity; GO:0016788,hydrolase activity, acting on ester bonds; GO:0052689,carboxylic ester hydrolase activity;…	PF04414.12:D-aminoacyl-tRNA deacylase	--	--	--
MS.gene00919	7.61	3.17	3.79	14.69	15.2	4.89	2.72	3.03	5.33	1.45	0.16	0	41	19	25	88	87	29	15	18	30	8	1	0	chr2.3	66059531	66060253	+	--	--	K00942 guanylate kinase [EC:2.7.4.8] | (GenBank) guanylate kinase-like protein (A)	ko00230: Purine metabolism; ko01100: Metabolic pathways	XP_013462709.1	GMK3_ARATH RecName: Full=Guanylate kinase 3, chloroplastic; Short=AtGK3; EC=2.7.4.8; AltName: Full=GMP kinase 3; Flags: Precursor;	At3g06200	GO:0009507,chloroplast; GO:0005829,cytosol; GO:0005524,ATP binding; GO:0004385,guanylate kinase activity; GO:0048638,regulation of developmental growth; GO:0000166,nucleotide binding; GO:0003674,molecular_function; GO:0005488,binding; GO:0008144,drug binding; GO:0017076,purine nucleotide binding; GO:0030554,adenyl nucleotide binding; GO:0032553,ribonucleotide binding; GO:0032555,purine ribonucleo…	PF00625.21:Guanylate kinase	--	--	--
MS.gene009237	1.05	0.94	1.28	20.23	7.14	6.42	15.87	1.19	27.06	0.51	0.93	0	4	4	6	86	29	27	62	5	108	2	4	0	chr3.3	555720	561959	-	--	--	K17784 MICOS complex subunit MIC10 | (GenBank) DUF543 domain protein (A)	--	XP_003597993.1	--	At1g22520	GO:0061617,MICOS complex; GO:0005622,intracellular; GO:0005575,cellular_component; GO:0016021,integral component of membrane; GO:0016020,membrane; GO:0005739,mitochondrion; GO:0005623,cell; GO:0005737,cytoplasm; GO:0005740,mitochondrial envelope; GO:0005743,mitochondrial inner membrane; GO:0043231,intracellular membrane-bounded organelle; GO:0019866,organelle inner membrane; GO:0031090,organelle …	PF04418.12:Domain of unknown function (DUF543)	--	--	--
MS.gene00925	9.07	8.52	24.71	8.91	3.63	5.59	4.28	1.14	3.8	4.49	2.58	51.14	87	91	290	95	37	59	42	12	38	44	28	458	chr2.3	66121345	66124470	+	--	--	K01915 glutamine synthetase [EC:6.3.1.2] | (GenBank) glutamine synthetase domain protein (A)	ko00220: Arginine biosynthesis; ko00250: Alanine, aspartate and glutamate metabolism; ko00630: Glyoxylate and dicarboxylate metabolism; ko00910: Nitrogen metabolism; ko01100: Metabolic pathways; ko01230: Biosynthesis of amino acids	Q9XQ94.1	GLNA2_MEDSA RecName: Full=Glutamine synthetase leaf isozyme, chloroplastic; EC=6.3.1.2; AltName: Full=GS2; AltName: Full=Glutamate--ammonia ligase; Flags: Precursor;	At5g35630	GO:0009507,chloroplast; GO:0005524,ATP binding; GO:0004356,glutamate-ammonia ligase activity; GO:0006542,glutamine biosynthetic process; GO:0000166,nucleotide binding; GO:0003674,molecular_function; GO:0005488,binding; GO:0008144,drug binding; GO:0017076,purine nucleotide binding; GO:0030554,adenyl nucleotide binding; GO:0032553,ribonucleotide binding; GO:0032555,purine ribonucleotide binding; GO…	PF00120.24:Glutamine synthetase, catalytic domain	--	--	--
MS.gene009280	96.34	41.4	88.86	1.24	67.36	98.86	16.16	4.37	7.91	8.75	68.82	0.74	140	67	158	2	104	158	24	7	12	13	113	1	chr3.2	254451	255063	+	--	--	--	--	XP_003598036.1	--	--	GO:0016021,integral component of membrane; GO:0016760,cellulose synthase (UDP-forming) activity; GO:0030244,cellulose biosynthetic process; GO:0003674,molecular_function; GO:0003824,catalytic activity; GO:0008194,UDP-glycosyltransferase activity; GO:0016740,transferase activity; GO:0016757,transferase activity, transferring glycosyl groups; GO:0016758,transferase activity, transferring hexosyl gr…	PF03552.14:Cellulose synthase	--	--	--
MS.gene009281	233.79	125.67	128.68	28.08	226.44	184.96	81.16	50.86	47.48	43.72	68.16	61.59	2793	1672	1881	373	2874	2430	991	669	592	534	920	687	chr3.2	309219	314152	+	--	--	K10999 cellulose synthase A [EC:2.4.1.12] | (RefSeq) cellulose synthase A catalytic subunit 7 [UDP-forming] (A)	--	XP_003598036.1	CSLG2_ARATH RecName: Full=Cellulose synthase-like protein G2; Short=AtCslG2; EC=2.4.1.-;	At4g23990	GO:0000139,Golgi membrane; GO:0016021,integral component of membrane; GO:0005886,plasma membrane; GO:0005802,trans-Golgi network; GO:0016760,cellulose synthase (UDP-forming) activity; GO:0051753,mannan synthase activity; GO:0071555,cell wall organization; GO:0030244,cellulose biosynthetic process; GO:0009833,plant-type primary cell wall biogenesis; GO:0003674,molecular_function; GO:0003824,cataly…	PF03552.14:Cellulose synthase	--	--	--
MS.gene009285	2.15	1.79	1.71	0.72	1.41	1.18	0.15	0.05	0.53	0.78	0.44	0	43	40	42	16	30	26	3	1	11	16	10	0	chr3.1	890133	901378	-	--	--	K12837 splicing factor U2AF 65 kDa subunit | (GenBank) U2 snRNP auxilliary factor, large subunit, splicing factor (A)	ko03040: Spliceosome	XP_003598047.1	U2A2B_NICPL RecName: Full=Splicing factor U2af large subunit B; AltName: Full=NpU2AF65b; AltName: Full=U2 auxiliary factor 65 kDa subunit B; AltName: Full=U2 small nuclear ribonucleoprotein auxiliary factor large subunit B; Short=U2 snRNP auxiliary factor large subunit B;	At4g36690	GO:0005634,nucleus; GO:0003723,RNA binding; GO:0006397,mRNA processing; GO:0008380,RNA splicing; GO:0003674,molecular_function; GO:0003676,nucleic acid binding; GO:0005488,binding; GO:0097159,organic cyclic compound binding; GO:1901363,heterocyclic compound binding; GO:0008152,metabolic process; GO:0006139,nucleobase-containing compound metabolic process; GO:0006396,RNA processing; GO:0006725,cel…	PF00076.22:RNA recognition motif. (a.k.a. RRM, RBD, or RNP domain)	--	--	--
MS.gene00933	0.87	2.02	2.27	6.39	40.96	2.52	14.76	27.71	28.4	77.82	4.3	16.71	5	13	16	41	251	16	87	176	171	459	28	90	chr2.3	66286319	66288176	+	--	--	K24205 protein lifeguard | (GenBank) inhibitor of apoptosis-promoting Bax1 protein (A)	--	XP_003594082.2	LFG5_ARATH RecName: Full=BI1-like protein; AltName: Full=Protein LIFEGUARD 5 {ECO:0000303|PubMed:23888068}; Short=AtLFG5 {ECO:0000303|PubMed:23888068};	At1g03070	GO:0016021,integral component of membrane; GO:0005575,cellular_component; GO:0016020,membrane; GO:0031224,intrinsic component of membrane; GO:0044425,membrane part	PF01027.20:Inhibitor of apoptosis-promoting Bax1	--	--	--
MS.gene009341	4.19	4.02	2.72	12.41	15.59	7.7	23.93	16.6	6.56	17.68	44.47	24.16	44	47	35	145	174	89	257	192	72	190	528	237	chr3.1	2179943	2184192	-	--	--	K17616 CTD small phosphatase-like protein 2 [EC:3.1.3.-] | (GenBank) NLI interacting factor-like phosphatase (A)	--	XP_013458789.1	TIM50_PHYIN RecName: Full=Mitochondrial import inner membrane translocase subunit TIM50; AltName: Full=NIF domain protein 3; Flags: Precursor;	At5g11860	GO:0016021,integral component of membrane; GO:0005744,TIM23 mitochondrial import inner membrane translocase complex; GO:0015031,protein transport; GO:0008104,protein localization; GO:0006810,transport; GO:0008150,biological_process; GO:0015833,peptide transport; GO:0033036,macromolecule localization; GO:0042886,amide transport; GO:0045184,establishment of protein localization; GO:0051179,localiza…	PF03031.18:NLI interacting factor-like phosphatase	--	--	--
MS.gene009450	30.56	27.7	19.19	1.17	13.68	6.44	32.91	47.9	119.18	129.86	151.41	459.99	328	331	252	14	156	76	361	566	1335	1425	1836	4609	chr3.2	3257974	3259413	-	--	--	K13420 LRR receptor-like serine/threonine-protein kinase FLS2 [EC:2.7.11.1] | (RefSeq) probable LRR receptor-like serine/threonine-protein kinase At3g47570 isoform X1 (A)	ko04016: MAPK signaling pathway - plant; ko04626: Plant-pathogen interaction	XP_003598256.1	PGIP2_ARATH RecName: Full=Polygalacturonase inhibitor 2; AltName: Full=Polygalacturonase-inhibiting protein 2; Short=PGIP-2; Flags: Precursor;	At1g33590	GO:0005618,cell wall; GO:0005576,extracellular region; GO:0016020,membrane; GO:0009505,plant-type cell wall; GO:0009506,plasmodesma; GO:0090353,polygalacturonase inhibitor activity; GO:0003674,molecular_function; GO:0004857,enzyme inhibitor activity; GO:0098772,molecular function regulator; GO:0030234,enzyme regulator activity; GO:0005575,cellular_component; GO:0005623,cell; GO:0030312,external e…	PF13855.6:Leucine rich repeat	--	--	--
MS.gene00946	0.91	5.97	3.9	0.46	5.73	0.32	0.5	0.46	0.63	0.45	0.67	0.98	18	131	94	10	120	7	10	10	13	9	15	18	chr2.3	66390134	66393304	+	--	--	--	--	XP_003594059.2	RF298_ARATH RecName: Full=Putative E3 ubiquitin-protein ligase RF298; EC=2.3.2.27; AltName: Full=RING finger protein 298; AltName: Full=RING-type E3 ubiquitin transferase RF298 {ECO:0000305};	At1g03370_1	GO:0046872,metal ion binding; GO:0016740,transferase activity; GO:0016567,protein ubiquitination; GO:0003674,molecular_function; GO:0005488,binding; GO:0043167,ion binding; GO:0043169,cation binding; GO:0003824,catalytic activity; GO:0008152,metabolic process; GO:0006464,cellular protein modification process; GO:0006807,nitrogen compound metabolic process; GO:0008150,biological_process; GO:000998…	PF13920.6:Zinc finger, C3HC4 type (RING finger)	--	--	--
MS.gene009466	1.94	1.3	2.29	0.2	0.34	0.9	0.44	0.21	0.61	0.27	0.4	0	43	32	62	5	8	22	10	5	14	6	10	0	chr3.2	3646011	3648980	+	--	--	--	--	XP_013458843.1	--	At5g56220	GO:0016787,hydrolase activity; GO:0000725,recombinational repair; GO:0003674,molecular_function; GO:0003824,catalytic activity; GO:0008152,metabolic process; GO:0006139,nucleobase-containing compound metabolic process; GO:0006259,DNA metabolic process; GO:0006281,DNA repair; GO:0006310,DNA recombination; GO:0006725,cellular aromatic compound metabolic process; GO:0006807,nitrogen compound metabol…	PF00931.22:NB-ARC domain	--	--	--
MS.gene009520	1.41	1.68	1.53	1.47	2.2	1.92	5.96	7.44	9.2	1.6	0.62	0	6	8	8	7	10	9	26	35	41	7	3	0	chr5.3	62733722	62734428	+	--	--	K23327 protein Hikeshi | (GenBank) OPI10-like protein (A)	--	XP_003616198.1	--	At1g66080	GO:0005829,cytosol; GO:0005634,nucleus; GO:0061608,nuclear import signal receptor activity; GO:0006606,protein import into nucleus; GO:0003674,molecular_function; GO:0140104,molecular carrier activity; GO:0140142,nucleocytoplasmic carrier activity; GO:0008104,protein localization; GO:0006810,transport; GO:0006886,intracellular protein transport; GO:0006913,nucleocytoplasmic transport; GO:0008150,…	PF05603.12:Protein of unknown function (DUF775)	--	--	--
MS.gene009604	7.89	18.11	32.97	0	0	0	7.72	0	15.96	5.15	4.66	25.36	9	23	46	0	0	0	9	0	19	6	6	27	chr5.3	61200499	61200651	+	--	--	--	--	XP_003616112.1	--	At3g02700	GO:0016746,transferase activity, transferring acyl groups; GO:0003674,molecular_function; GO:0003824,catalytic activity; GO:0016740,transferase activity	--	--	--	--
MS.gene009605	12.72	11.03	23.83	0.2	2.27	2.99	6.86	1.79	12.18	2.57	7.37	0	58	56	133	1	11	15	32	9	58	12	38	0	chr5.3	61196368	61200472	+	--	--	K03283 heat shock 70kDa protein 1/2/6/8 | (RefSeq) heat shock cognate 70 kDa protein 2-like (A)	ko03040: Spliceosome; ko04141: Protein processing in endoplasmic reticulum; ko04144: Endocytosis	XP_003616112.1	PSE1_ARATH RecName: Full=Protein LEAD-SENSITIVE 1 {ECO:0000303|PubMed:27335453}; Short=Protein Pb-SENSITIVE 1 {ECO:0000303|PubMed:27335453};	At3g02700	GO:0005737,cytoplasm; GO:0071284,cellular response to lead ion; GO:0015692,lead ion transport; GO:0046938,phytochelatin biosynthetic process; GO:0010288,response to lead ion; GO:0008150,biological_process; GO:0010038,response to metal ion; GO:0009987,cellular process; GO:0010035,response to inorganic substance; GO:0070887,cellular response to chemical stimulus; GO:0042221,response to chemical; GO…	PF04970.13:Lecithin retinol acyltransferase	--	--	--
MS.gene00961	49.97	70	47.08	25.83	62.89	61.26	12.16	23.32	7.67	25.2	23.46	5.62	543	847	626	312	726	732	135	279	87	280	288	57	chr2.3	66579277	66584837	-	--	--	K03444 MFS transporter, SP family, ERD6-like sugar transporter | (GenBank) sugar porter (SP) family MFS transporter (A)	--	XP_003594043.1	EDL16_ARATH RecName: Full=Sugar transporter ERD6-like 16;	At5g18840	GO:0016021,integral component of membrane; GO:0022857,transmembrane transporter activity; GO:0008643,carbohydrate transport; GO:0003674,molecular_function; GO:0005215,transporter activity; GO:0006810,transport; GO:0008150,biological_process; GO:0051179,localization; GO:0051234,establishment of localization; GO:0071702,organic substance transport; GO:0005575,cellular_component; GO:0016020,membrane…	PF00083.24:Sugar (and other) transporter	--	--	--
MS.gene009616	0.35	1.71	0	4.19	7.31	17.59	0.17	4.39	2.15	21.62	31.18	188.66	2	11	0	27	45	112	1	28	13	128	204	1020	chr5.3	61086760	61087536	+	--	--	K04077 chaperonin GroEL | (RefSeq) chaperonin CPN60-like 2, mitochondrial (A)	ko03018: RNA degradation	XP_004490745.1	NHL6_ARATH RecName: Full=NDR1/HIN1-like protein 6 {ECO:0000303|PubMed:26849212};	At5g36970	GO:0005829,cytosol; GO:0016021,integral component of membrane; GO:0005886,plasma membrane; GO:0009738,abscisic acid-activated signaling pathway; GO:0010116,positive regulation of abscisic acid biosynthetic process; GO:0009737,response to abscisic acid; GO:0006970,response to osmotic stress; GO:1902074,response to salt; GO:0001101,response to acid chemical; GO:0007165,signal transduction; GO:00071…	PF03168.13:Late embryogenesis abundant protein	--	--	--
MS.gene009647	941.59	558.12	468.91	124.16	121.94	251.74	193.9	486.09	183.97	214.94	195.88	9.91	1221	806	744	179	168	359	257	694	249	285	287	12	chr5.3	60674682	60674855	-	--	--	K00430 peroxidase [EC:1.11.1.7] | (RefSeq) peroxidase P7-like isoform X1 (A)	ko00940: Phenylpropanoid biosynthesis; ko01100: Metabolic pathways; ko01110: Biosynthesis of secondary metabolites	XP_003616060.1	UCRQ2_ARATH RecName: Full=Cytochrome b-c1 complex subunit 8-2, mitochondrial; AltName: Full=Complex III subunit 8-2; AltName: Full=Complex III subunit VIII; AltName: Full=Ubiquinol-cytochrome c oxidoreductase subunit 8-2; AltName: Full=Ubiquinol-cytochrome c reductase complex ubiquinone-binding protein QP-C;	At5g05370	GO:0016021,integral component of membrane; GO:0005750,mitochondrial respiratory chain complex III; GO:0005886,plasma membrane; GO:0008121,ubiquinol-cytochrome-c reductase activity; GO:0009055,electron transfer activity; GO:0003674,molecular_function; GO:0003824,catalytic activity; GO:0016491,oxidoreductase activity; GO:0016679,oxidoreductase activity, acting on diphenols and related substances as…	PF10890.8:Cytochrome b-c1 complex subunit 8	--	--	--
MS.gene009652	2.34	1.46	2.84	0	0	0.39	1.39	0.26	0.48	0.14	1.38	0	33	23	49	0	0	6	20	4	7	2	22	0	chr5.3	60615545	60617703	-	--	--	K20359 PRA1 family protein 1 | (RefSeq) hypothetical protein (A)	--	XP_003616055.1	Y5830_ARATH RecName: Full=Probable inactive receptor kinase At5g58300; Flags: Precursor;	At5g58300	GO:0016021,integral component of membrane; GO:0005886,plasma membrane; GO:0005524,ATP binding; GO:0004672,protein kinase activity; GO:0000166,nucleotide binding; GO:0003674,molecular_function; GO:0005488,binding; GO:0008144,drug binding; GO:0017076,purine nucleotide binding; GO:0030554,adenyl nucleotide binding; GO:0032553,ribonucleotide binding; GO:0032555,purine ribonucleotide binding; GO:00325…	PF00069.25:Protein kinase domain	--	--	--
MS.gene009658	24.88	29.79	14.89	22.53	6.74	5.77	0.48	6.8	4.21	11.93	13.82	9.93	153	204	112	154	44	39	3	46	27	75	96	57	chr5.3	60494569	60497768	-	--	--	K03238 translation initiation factor 2 subunit 2 | (GenBank) eukaryotic translation initiation factor 2 subunit beta (A)	ko03013: RNA transport	XP_003616045.1	IF2B_MALDO RecName: Full=Eukaryotic translation initiation factor 2 subunit beta; Short=eIF-2-beta;	At5g20920	GO:0046872,metal ion binding; GO:0003743,translation initiation factor activity; GO:0003674,molecular_function; GO:0005488,binding; GO:0043167,ion binding; GO:0043169,cation binding; GO:0003676,nucleic acid binding; GO:0003723,RNA binding; GO:0008135,translation factor activity, RNA binding; GO:0097159,organic cyclic compound binding; GO:1901363,heterocyclic compound binding	PF01873.17:Domain found in IF2B/IF5	--	--	--
MS.gene009662	103.66	132.21	86.45	29.6	38.45	39.55	41.69	134.13	75.81	56.86	94.63	35.9	1175	1669	1199	373	463	493	483	1674	897	659	1212	380	chr5.3	60401099	60405617	-	--	--	K00487 trans-cinnamate 4-monooxygenase [EC:1.14.14.91] | (GenBank) cytochrome P450 family cinnamate 4-hydroxylase (A)	ko00130: Ubiquinone and other terpenoid-quinone biosynthesis; ko00940: Phenylpropanoid biosynthesis; ko00941: Flavonoid biosynthesis; ko00945: Stilbenoid, diarylheptanoid and gingerol biosynthesis; ko01100: Metabolic pathways; ko01110: Biosynthesis of secondary metabolites	XP_003616037.1	TCMO_MEDSA RecName: Full=Trans-cinnamate 4-monooxygenase; EC=1.14.14.91 {ECO:0000250|UniProtKB:Q04468}; AltName: Full=Cinnamic acid 4-hydroxylase; Short=C4H; Short=CA4H; AltName: Full=Cytochrome P450 73; AltName: Full=Cytochrome P450C4H;	At2g30490	GO:0016021,integral component of membrane; GO:0020037,heme binding; GO:0005506,iron ion binding; GO:0016710,trans-cinnamate 4-monooxygenase activity; GO:0003674,molecular_function; GO:0005488,binding; GO:0046906,tetrapyrrole binding; GO:0048037,cofactor binding; GO:0097159,organic cyclic compound binding; GO:1901363,heterocyclic compound binding; GO:0046872,metal ion binding; GO:0043167,ion bindi…	PF00067.22:Cytochrome P450	--	--	--
MS.gene009712	0.27	0.36	2.57	0.12	0.55	0.29	0.13	0.08	0.04	0.97	0.24	0	6	9	70	3	13	7	3	2	1	22	6	0	chr5.3	59046956	59054884	-	--	--	--	--	XP_003615974.1	TI110_PEA RecName: Full=Protein TIC110, chloroplastic; AltName: Full=Chloroplast inner envelope protein, 110 kDa; Short=psIEP110; AltName: Full=IAP100; AltName: Full=Translocon at the inner envelope membrane of chloroplasts 110; Flags: Precursor;	At1g06950	GO:0009706,chloroplast inner membrane; GO:0016021,integral component of membrane; GO:0015031,protein transport; GO:0008104,protein localization; GO:0006810,transport; GO:0008150,biological_process; GO:0015833,peptide transport; GO:0033036,macromolecule localization; GO:0042886,amide transport; GO:0045184,establishment of protein localization; GO:0051179,localization; GO:0051234,establishment of l…	PF16940.5:Chloroplast envelope transporter	--	--	--
MS.gene009750	2.08	3.55	3.63	4.05	4.44	4.22	8.55	12.91	15.88	2.85	9.08	17.68	30	57	64	65	68	67	126	205	239	42	148	238	chr5.3	58377820	58379754	+	--	--	K07195 exocyst complex component 7 | (RefSeq) exocyst complex component EXO70B1-like (A)	--	XP_003615883.1	E70B1_ARATH RecName: Full=Exocyst complex component EXO70B1 {ECO:0000303|PubMed:23944713}; Short=AtExo70b1 {ECO:0000303|PubMed:23944713}; AltName: Full=Exocyst subunit Exo70 family protein B1 {ECO:0000303|PubMed:23944713};	At5g58430	GO:0005829,cytosol; GO:0012505,endomembrane system; GO:0000145,exocyst; GO:0070062,extracellular exosome; GO:0045335,phagocytic vesicle; GO:0005886,plasma membrane; GO:0006952,defense response; GO:0052542,defense response by callose deposition; GO:0042742,defense response to bacterium; GO:0050832,defense response to fungus; GO:0006887,exocytosis; GO:0006955,immune response; GO:0009789,positive re…	PF03081.15:Exo70 exocyst complex subunit	--	--	--
MS.gene009824	0.1	1.03	0.26	1.22	0	0.19	5.29	5.2	7.77	4.98	4.23	4.57	1	11	3	13	0	2	52	55	78	49	46	41	chr5.3	56738145	56739516	+	--	--	K20716 mitogen-activated protein kinase kinase kinase 17/18 | (RefSeq) mitogen-activated protein kinase kinase kinase 18-like (A)	ko04016: MAPK signaling pathway - plant	XP_003615727.2	M3K17_ARATH RecName: Full=Mitogen-activated protein kinase kinase kinase 17 {ECO:0000303|PubMed:25720833}; EC=2.7.11.25 {ECO:0000250|UniProtKB:Q9ZVP5, ECO:0000255|PROSITE-ProRule:PRU00159};	At2g30040	GO:0005634,nucleus; GO:0005524,ATP binding; GO:0004709,MAP kinase kinase kinase activity; GO:0019901,protein kinase binding; GO:0106310,NA; GO:0004674,protein serine/threonine kinase activity; GO:0106311,NA; GO:0009738,abscisic acid-activated signaling pathway; GO:0009737,response to abscisic acid; GO:0006970,response to osmotic stress; GO:0007165,signal transduction; GO:0000166,nucleotide bindin…	PF00069.25:Protein kinase domain	--	--	--
MS.gene009841	2.15	4.95	3.37	10.09	8.47	7.26	9.17	18.64	20.82	13.82	12.5	17.98	34	87	65	177	142	126	148	324	343	223	223	265	chr5.3	56454542	56456659	+	--	--	K23047 E3 ubiquitin-protein ligase UNKL [EC:2.3.2.27] | (RefSeq) zinc finger CCCH domain-containing protein 2-like isoform X2 (A)	--	XP_003615688.2	C3H66_ARATH RecName: Full=Zinc finger CCCH domain-containing protein 66; Short=AtC3H66;	At5g58620	GO:0010494,cytoplasmic stress granule; GO:0000932,P-body; GO:0003677,DNA binding; GO:0003700,DNA-binding transcription factor activity; GO:0046872,metal ion binding; GO:0003723,RNA binding; GO:0006355,regulation of transcription, DNA-templated; GO:0006412,translation; GO:0003674,molecular_function; GO:0003676,nucleic acid binding; GO:0005488,binding; GO:0097159,organic cyclic compound binding; GO…	PF12796.7:Ankyrin repeats (3 copies)	C3H	TF	C3H
MS.gene009843	17.62	21.16	18.28	1.42	16.3	14.93	9.21	3.9	5.19	7.22	8.73	11.86	234	313	297	21	230	218	125	57	72	98	131	147	chr5.3	56394790	56399877	+	--	--	K05857 phosphatidylinositol phospholipase C, delta [EC:3.1.4.11] | (GenBank) phosphatidylinositol-specific phospholipase C (A)	ko00562: Inositol phosphate metabolism; ko01100: Metabolic pathways; ko04070: Phosphatidylinositol signaling system	XP_003615684.2	PLCD4_ARATH RecName: Full=Phosphoinositide phospholipase C 4; EC=3.1.4.11; AltName: Full=Phosphoinositide phospholipase PLC4; Short=AtPLC4; Short=PI-PLC4;	At5g58700	GO:0005829,cytosol; GO:0005886,plasma membrane; GO:0004435,phosphatidylinositol phospholipase C activity; GO:0016042,lipid catabolic process; GO:0048015,phosphatidylinositol-mediated signaling; GO:0003674,molecular_function; GO:0003824,catalytic activity; GO:0004620,phospholipase activity; GO:0004629,phospholipase C activity; GO:0008081,phosphoric diester hydrolase activity; GO:0016298,lipase act…	PF00388.19:Phosphatidylinositol-specific phospholipase C, X domain	--	--	--
MS.gene009861	1.76	4.02	2.55	82.41	15.31	11.09	9.81	1.11	14.15	12.33	9.84	0	13	33	23	676	120	90	74	9	109	93	82	0	chr5.3	56192892	56200881	-	--	--	K17893 ubiquinol oxidase [EC:1.10.3.11] | (GenBank) ubiquinol oxidase 1a (A)	--	AGQ42776.1	AOX3_SOYBN RecName: Full=Alternative oxidase 3, mitochondrial; EC=1.10.3.11; Flags: Precursor;	At5g64210	GO:0016021,integral component of membrane; GO:0005743,mitochondrial inner membrane; GO:0005739,mitochondrion; GO:0070469,respiratory chain; GO:0009916,alternative oxidase activity; GO:0046872,metal ion binding; GO:0102721,ubiquinol:oxygen oxidoreductase activity; GO:0010230,alternative respiration; GO:0003674,molecular_function; GO:0003824,catalytic activity; GO:0016491,oxidoreductase activity; G…	PF01786.17:Alternative oxidase	--	--	--
MS.gene00991	29.37	50.95	0.82	0.75	1.26	1.67	2.61	11.22	2.24	0.98	1.18	0.36	176	340	6	5	8	11	16	74	14	6	8	2	chr2.3	66947192	66950176	-	--	--	K10144 RING finger and CHY zinc finger domain-containing protein 1 [EC:2.3.2.27] | (GenBank) CHY and CTCHY and RING-type zinc finger protein (A)	ko04120: Ubiquitin mediated proteolysis	XP_003593984.1	MIEL1_ARATH RecName: Full=E3 ubiquitin-protein ligase MIEL1 {ECO:0000303|PubMed:23403577}; EC=2.3.2.27 {ECO:0000305}; AltName: Full=MYB30-interacting E3 ligase 1 {ECO:0000303|PubMed:23403577}; AltName: Full=Pirh2-like protein 1 {ECO:0000303|PubMed:21526181}; Short=AtPILP1 {ECO:0000303|PubMed:21526181}; AltName: Full=RING-type E3 ubiquitin transferase MIEL1 {ECO:0000305};	At5g18650	GO:0005737,cytoplasm; GO:0005634,nucleus; GO:0008134,transcription factor binding; GO:0061630,ubiquitin protein ligase activity; GO:0004842,ubiquitin-protein transferase activity; GO:0008270,zinc ion binding; GO:0006952,defense response; GO:1900425,negative regulation of defense response to bacterium; GO:1901485,positive regulation of transcription factor catabolic process; GO:0016567,protein ubi…	PF14599.6:Zinc-ribbon	--	--	--
MS.gene009922	3.68	4.38	9.02	9.07	10.69	5.53	3.76	1.67	0.84	0.94	2.05	0.94	46	61	138	126	142	76	48	23	11	12	29	11	chr5.3	55407101	55411545	+	--	--	K05909 laccase [EC:1.10.3.2] | (GenBank) laccase/diphenol oxidase family protein (A)	--	XP_003615575.2	LAC4_ARATH RecName: Full=Laccase-4; EC=1.10.3.2; AltName: Full=Benzenediol:oxygen oxidoreductase 4; AltName: Full=Diphenol oxidase 4; AltName: Full=Protein IRREGULAR XYLEM 12; AltName: Full=Urishiol oxidase 4; Flags: Precursor;	At2g38080	GO:0048046,apoplast; GO:0009505,plant-type cell wall; GO:0005507,copper ion binding; GO:0052716,hydroquinone:oxygen oxidoreductase activity; GO:0016491,oxidoreductase activity; GO:0009809,lignin biosynthetic process; GO:0046274,lignin catabolic process; GO:0009834,plant-type secondary cell wall biogenesis; GO:0003674,molecular_function; GO:0005488,binding; GO:0046872,metal ion binding; GO:0043167…	PF00394.22:Multicopper oxidase	--	--	--
MS.gene00994	3.28	1.59	3.49	0.23	0.37	0.43	0.59	1.18	0.37	2.45	0.5	0.42	76	41	99	6	9	11	14	30	9	58	13	9	chr2.3	66975928	66983941	+	--	--	K11654 SWI/SNF-related matrix-associated actin-dependent regulator of chromatin subfamily A member 5 [EC:3.6.4.-] | (GenBank) chromatin remodeling factor, putative (A)	--	XP_003593979.1	ISW2_ORYSJ RecName: Full=Probable chromatin-remodeling complex ATPase chain; EC=3.6.4.-; AltName: Full=ISW2-like; AltName: Full=Sucrose nonfermenting protein 2 homolog;	At3g06400	GO:0005634,nucleus; GO:0005524,ATP binding; GO:0008094,DNA-dependent ATPase activity; GO:0003677,DNA binding; GO:0004386,helicase activity; GO:0031491,nucleosome binding; GO:0070615,nucleosome-dependent ATPase activity; GO:0043044,ATP-dependent chromatin remodeling; GO:0016584,nucleosome positioning; GO:0000166,nucleotide binding; GO:0003674,molecular_function; GO:0005488,binding; GO:0008144,drug…	PF00176.23:SNF2 family N-terminal domain	SNF2	TR	SNF2
MS.gene009955	0	0	0.37	0.82	0	0.1	0.45	4.77	2.4	1	1.72	0	0	0	4	8	0	1	4	46	22	9	17	0	chr5.3	54985006	54986837	-	--	--	K01623 fructose-bisphosphate aldolase, class I [EC:4.1.2.13] | (GenBank) fructose-bisphosphate aldolase (A)	ko00010: Glycolysis / Gluconeogenesis; ko00030: Pentose phosphate pathway; ko00051: Fructose and mannose metabolism; ko00710: Carbon fixation in photosynthetic organisms; ko01100: Metabolic pathways; ko01110: Biosynthesis of secondary metabolites; ko01200: Carbon metabolism; ko01230: Biosynthesis of amino acids	XP_003615520.2	ALF2_PEA RecName: Full=Fructose-bisphosphate aldolase, cytoplasmic isozyme 2; EC=4.1.2.13;	At3g52930	GO:0005737,cytoplasm; GO:0004332,fructose-bisphosphate aldolase activity; GO:0006096,glycolytic process; GO:0003674,molecular_function; GO:0003824,catalytic activity; GO:0016829,lyase activity; GO:0016830,carbon-carbon lyase activity; GO:0016832,aldehyde-lyase activity; GO:0008152,metabolic process; GO:0005975,carbohydrate metabolic process; GO:0006082,organic acid metabolic process; GO:0006090,p…	PF00274.19:Fructose-bisphosphate aldolase class-I	--	--	--
MS.gene010007	12.05	0.16	1.34	0.49	1.03	0	11.61	14.59	2.97	7.68	7.11	10.36	66	1	9	3	6	0	65	88	17	43	44	53	chr5.3	54318231	54323008	-	--	--	--	--	XP_003616349.1	--	--	GO:0061630,ubiquitin protein ligase activity; GO:0003674,molecular_function; GO:0003824,catalytic activity; GO:0004842,ubiquitin-protein transferase activity; GO:0016740,transferase activity; GO:0019787,ubiquitin-like protein transferase activity; GO:0061659,ubiquitin-like protein ligase activity; GO:0140096,catalytic activity, acting on a protein	--	--	--	--
MS.gene010024	0	0	0	2.55	0.47	1.52	0.82	0.15	1.12	0	0	0	0	0	0	17	3	10	5	1	7	0	0	0	chr5.3	53920077	53922380	+	--	--	K15382 solute carrier family 50 (sugar transporter) | (GenBank) bidirectional sugar transporter (A)	--	XP_003615405.1	NOD3_MEDTR RecName: Full=Bidirectional sugar transporter N3; AltName: Full=Nodulin 3; Short=MtN3; Short=N-3;	At5g13170	GO:0005887,integral component of plasma membrane; GO:0051119,sugar transmembrane transporter activity; GO:0003674,molecular_function; GO:0005215,transporter activity; GO:0022857,transmembrane transporter activity; GO:0015144,carbohydrate transmembrane transporter activity; GO:0005886,plasma membrane; GO:0005575,cellular_component; GO:0016021,integral component of membrane; GO:0016020,membrane; GO…	PF03083.16:Sugar efflux transporter for intercellular exchange	--	--	--
MS.gene010046	0.1	0	0	0.18	0.09	0.09	2.94	2.45	0	0.1	0.8	0	1	0	0	2	1	1	30	27	0	1	9	0	chr5.4	52485315	52493644	-	--	--	K07198 5'-AMP-activated protein kinase, catalytic alpha subunit [EC:2.7.11.11] | (RefSeq) CBL-interacting serine/threonine-protein kinase 1-like isoform X1 (A)	--	XP_003615372.2	CIPK8_ARATH RecName: Full=CBL-interacting serine/threonine-protein kinase 8; EC=2.7.11.1; AltName: Full=SNF1-related kinase 3.13; AltName: Full=SOS2-like protein kinase PKS11;	At4g24400	GO:0005737,cytoplasm; GO:0005634,nucleus; GO:0005886,plasma membrane; GO:0005524,ATP binding; GO:0004672,protein kinase activity; GO:0106310,NA; GO:0004674,protein serine/threonine kinase activity; GO:0106311,NA; GO:0035556,intracellular signal transduction; GO:0046777,protein autophosphorylation; GO:0006468,protein phosphorylation; GO:0009749,response to glucose; GO:0010167,response to nitrate; …	PF00069.25:Protein kinase domain	--	--	--
MS.gene010081	0.68	1.71	0.56	9.44	0.9	9.55	8.27	3.22	5.75	3.33	0.97	0.29	5	14	5	77	7	77	62	26	44	25	8	2	chr5.2	56486763	56494713	+	--	--	K21444 poly(rC)-binding protein 3/4 | (RefSeq) KH domain-containing protein HEN4 isoform X1 (A)	--	XP_003615317.1	GAT25_ARATH RecName: Full=GATA transcription factor 25; AltName: Full=Protein TIFY 1; AltName: Full=Protein ZIM;	At4g24470	GO:0005634,nucleus; GO:0042802,identical protein binding; GO:0043565,sequence-specific DNA binding; GO:0008270,zinc ion binding; GO:0006355,regulation of transcription, DNA-templated; GO:0005515,protein binding; GO:0003674,molecular_function; GO:0005488,binding; GO:0003676,nucleic acid binding; GO:0003677,DNA binding; GO:0097159,organic cyclic compound binding; GO:1901363,heterocyclic compound bi…	PF06203.14:CCT motif	C2C2-GATA	TF	C2C2->C2C2-GATA
MS.gene010114	29.38	34.77	56.25	33.2	33.11	18.03	9.91	7.89	17.33	7.57	25.62	9.61	406	535	951	510	486	274	140	120	250	107	400	124	chr5.2	55897165	55906806	+	--	--	K01810 glucose-6-phosphate isomerase [EC:5.3.1.9] | (GenBank) glucose-6-phosphate isomerase (A)	ko00010: Glycolysis / Gluconeogenesis; ko00030: Pentose phosphate pathway; ko00500: Starch and sucrose metabolism; ko00520: Amino sugar and nucleotide sugar metabolism; ko01100: Metabolic pathways; ko01110: Biosynthesis of secondary metabolites; ko01200: Carbon metabolism	XP_003615260.2	G6PIP_ARATH RecName: Full=Glucose-6-phosphate isomerase 1, chloroplastic; Short=GPI 1; EC=5.3.1.9; AltName: Full=Phosphoglucose isomerase 1; Short=PGI 1; AltName: Full=Phosphohexose isomerase; Short=PHI; Flags: Precursor;	At4g24620	GO:0009507,chloroplast; GO:0009941,chloroplast envelope; GO:0009570,chloroplast stroma; GO:0005829,cytosol; GO:0009536,plastid; GO:0004347,glucose-6-phosphate isomerase activity; GO:0048029,monosaccharide binding; GO:0006094,gluconeogenesis; GO:0051156,glucose 6-phosphate metabolic process; GO:0006096,glycolytic process; GO:0009911,positive regulation of flower development; GO:0005982,starch meta…	PF00342.19:Phosphoglucose isomerase	--	--	--
MS.gene010119	0.58	1.21	0.95	18.73	8.71	7.01	20.18	18.74	3.14	29.22	10.41	26.43	3	7	6	108	48	40	107	107	17	155	61	128	chr5.2	55740541	55744992	+	--	--	--	--	XP_003615240.1	STR6_ARATH RecName: Full=Rhodanese-like domain-containing protein 6; AltName: Full=Sulfurtransferase 6; Short=AtStr6;	At4g24380	GO:0005737,cytoplasm; GO:0005634,nucleus; GO:0005622,intracellular; GO:0005575,cellular_component; GO:0005623,cell; GO:0044424,intracellular part; GO:0044464,cell part; GO:0043231,intracellular membrane-bounded organelle; GO:0043226,organelle; GO:0043227,membrane-bounded organelle; GO:0043229,intracellular organelle	PF03959.13:Serine hydrolase (FSH1)	--	--	--
MS.gene010192	9.18	6.6	6.71	88.23	70.27	29.67	61.3	133.35	89.74	259.08	288.66	632.94	85	68	76	908	691	302	580	1359	867	2452	3019	5470	chr5.1	49248289	49251750	-	--	--	K23452 UDP-glucosyltransferase 85A [EC:2.4.1.-] | (RefSeq) UDP-glycosyltransferase 85A2 (A)	ko00908: Zeatin biosynthesis; ko01110: Biosynthesis of secondary metabolites	XP_003615138.1	UGT2_GARJA RecName: Full=7-deoxyloganetin glucosyltransferase; EC=2.4.1.324; AltName: Full=Genipin glucosyltransferase; AltName: Full=UDP-glucose glucosyltransferase 2; Short=GjUGT2; AltName: Full=UDP-glycosyltransferase 85A24;	At1g22360	GO:0035251,UDP-glucosyltransferase activity; GO:0003674,molecular_function; GO:0003824,catalytic activity; GO:0008194,UDP-glycosyltransferase activity; GO:0016740,transferase activity; GO:0016757,transferase activity, transferring glycosyl groups; GO:0016758,transferase activity, transferring hexosyl groups; GO:0046527,glucosyltransferase activity	PF00201.18:UDP-glucoronosyl and UDP-glucosyl transferase	--	--	--
MS.gene010193	0.48	0.14	0.26	0	0.15	0	4.71	13.1	1.84	8.31	25.68	1352.15	3	1	2	0	1	0	30	90	12	53	181	7875	chr5.1	49235667	49239107	-	--	--	K23452 UDP-glucosyltransferase 85A [EC:2.4.1.-] | (RefSeq) UDP-glycosyltransferase 85A2-like (A)	ko00908: Zeatin biosynthesis; ko01110: Biosynthesis of secondary metabolites	XP_013454066.1	UGT2_GARJA RecName: Full=7-deoxyloganetin glucosyltransferase; EC=2.4.1.324; AltName: Full=Genipin glucosyltransferase; AltName: Full=UDP-glucose glucosyltransferase 2; Short=GjUGT2; AltName: Full=UDP-glycosyltransferase 85A24;	At1g22360	GO:0035251,UDP-glucosyltransferase activity; GO:0003674,molecular_function; GO:0003824,catalytic activity; GO:0008194,UDP-glycosyltransferase activity; GO:0016740,transferase activity; GO:0016757,transferase activity, transferring glycosyl groups; GO:0016758,transferase activity, transferring hexosyl groups; GO:0046527,glucosyltransferase activity	--	--	--	--
MS.gene010226	17.89	11.31	28.76	18.84	26.37	19.05	48.6	153.3	104.87	59.4	96.98	48.28	152	107	299	178	238	178	422	1434	930	516	931	383	chr5.1	48512352	48514624	-	--	--	K01087 trehalose 6-phosphate phosphatase [EC:3.1.3.12] | (GenBank) trehalose-6-phosphate phosphatase (A)	ko00500: Starch and sucrose metabolism; ko01100: Metabolic pathways; ko01110: Biosynthesis of secondary metabolites	ADK11431.1	TPPB_ARATH RecName: Full=Trehalose-phosphate phosphatase B; Short=AtTPPB; EC=3.1.3.12; AltName: Full=Trehalose 6-phosphate phosphatase;	At1g78090	GO:0004805,trehalose-phosphatase activity; GO:0005992,trehalose biosynthetic process; GO:0003674,molecular_function; GO:0003824,catalytic activity; GO:0016787,hydrolase activity; GO:0016788,hydrolase activity, acting on ester bonds; GO:0016791,phosphatase activity; GO:0019203,carbohydrate phosphatase activity; GO:0042578,phosphoric ester hydrolase activity; GO:0008152,metabolic process; GO:000597…	PF02358.16:Trehalose-phosphatase	--	--	--
MS.gene010290	4.33	7.02	0.2	0	0	0	0.12	0.33	0.12	1.06	0	0	36	65	2	0	0	0	1	3	1	9	0	0	chr5.4	47648210	47650356	-	--	--	K11294 nucleolin | (RefSeq) nucleolin-like (A)	--	PNX72859.1	--	At2g01840	GO:0016021,integral component of membrane; GO:0003676,nucleic acid binding; GO:0008270,zinc ion binding; GO:0003674,molecular_function; GO:0005488,binding; GO:0097159,organic cyclic compound binding; GO:1901363,heterocyclic compound binding; GO:0046872,metal ion binding; GO:0043167,ion binding; GO:0043169,cation binding; GO:0046914,transition metal ion binding; GO:0005575,cellular_component; GO:0…	PF14111.6:Domain of unknown function (DUF4283)	--	--	--
MS.gene01038	0.13	0.58	0.42	0.69	0.48	0.12	2.64	13.19	9.11	0.75	3.64	5.09	1	5	4	6	4	1	21	113	74	6	32	37	chr2.4	70436323	70438123	-	--	--	K09510 DnaJ homolog subfamily B member 4 | (GenBank) DnaJ heat shock family protein (A)	--	XP_003593642.1	DNJH_ATRNU RecName: Full=DnaJ protein homolog ANJ1; Flags: Precursor;	At2g20560	GO:0016020,membrane; GO:0005524,ATP binding; GO:0030544,Hsp70 protein binding; GO:0046872,metal ion binding; GO:0051082,unfolded protein binding; GO:0006457,protein folding; GO:0009408,response to heat; GO:0000166,nucleotide binding; GO:0003674,molecular_function; GO:0005488,binding; GO:0008144,drug binding; GO:0017076,purine nucleotide binding; GO:0030554,adenyl nucleotide binding; GO:0032553,ri…	PF01556.18:DnaJ C terminal domain	--	--	--
MS.gene010381	70.88	99.89	77.98	95.11	84.2	129.73	199.27	321.25	256.45	343.44	368.44	238.05	309	485	416	461	390	622	888	1542	1167	1531	1815	969	chr5.4	10800807	10801968	+	--	--	--	--	XP_003611770.1	PCR2_ARATH RecName: Full=Protein PLANT CADMIUM RESISTANCE 2; Short=AtPCR2;	At1g14870	GO:0016021,integral component of membrane; GO:0005886,plasma membrane; GO:0006979,response to oxidative stress; GO:0006950,response to stress; GO:0008150,biological_process; GO:0050896,response to stimulus; GO:0005575,cellular_component; GO:0016020,membrane; GO:0031224,intrinsic component of membrane; GO:0044425,membrane part; GO:0005623,cell; GO:0044464,cell part; GO:0071944,cell periphery	PF04749.17:PLAC8 family	--	--	--
MS.gene010404	0.85	2.19	0.52	0.29	2.29	1.16	5.5	3.08	11.17	1.66	3.1	0.11	8	23	6	3	23	12	53	32	110	16	33	1	chr5.4	11023389	11026243	-	--	--	K20721 reticulon-1 | (GenBank) reticulon-like protein (A)	--	XP_003611810.2	RTNLM_ARATH RecName: Full=Reticulon-like protein B13; Short=AtRTNLB13;	At2g23640	GO:0005789,endoplasmic reticulum membrane; GO:0071782,endoplasmic reticulum tubular network; GO:0071458,integral component of cytoplasmic side of endoplasmic reticulum membrane; GO:0071786,endoplasmic reticulum tubular network organization; GO:0006996,organelle organization; GO:0007029,endoplasmic reticulum organization; GO:0008150,biological_process; GO:0009987,cellular process; GO:0010256,endom…	PF02453.17:Reticulon	--	--	--
MS.gene010408	75.56	70.74	119.91	238.63	70.64	59.62	231.22	381.16	491.82	235.28	289.84	335.88	446	465	866	1566	443	387	1395	2477	3030	1420	1933	1851	chr5.4	11069780	11073551	-	--	--	K20802 (R)-mandelonitrile lyase [EC:4.1.2.10] | (RefSeq) MES5; methyl esterase 5 (A)	ko00460: Cyanoamino acid metabolism; ko01100: Metabolic pathways; ko01110: Biosynthesis of secondary metabolites	XP_003611828.1	MES3_ARATH RecName: Full=Methylesterase 3; Short=AtMES3; EC=3.1.1.-;	At2g23610	GO:0005773,vacuole; GO:0016788,hydrolase activity, acting on ester bonds; GO:0080030,methyl indole-3-acetate esterase activity; GO:0080032,methyl jasmonate esterase activity; GO:0080031,methyl salicylate esterase activity; GO:0009694,jasmonic acid metabolic process; GO:0009696,salicylic acid metabolic process; GO:0003674,molecular_function; GO:0003824,catalytic activity; GO:0016787,hydrolase acti…	PF12697.7:Alpha/beta hydrolase family	--	--	--
MS.gene010442	0.1	0.53	0.32	4.16	1.39	3.58	0.29	1.07	0.47	3.56	1.39	0.11	1	6	4	47	15	40	3	12	5	37	16	1	chr5.4	11532711	11535621	+	--	--	K15472 premnaspirodiene oxygenase [EC:1.14.14.151] | (RefSeq) premnaspirodiene oxygenase (A)	ko00909: Sesquiterpenoid and triterpenoid biosynthesis; ko01110: Biosynthesis of secondary metabolites	XP_003611886.1	C71D8_SOYBN RecName: Full=Cytochrome P450 71D8; EC=1.14.-.-; AltName: Full=Cytochrome P450 CP7;	At3g26300	GO:0020037,heme binding; GO:0005506,iron ion binding; GO:0004497,monooxygenase activity; GO:0016705,oxidoreductase activity, acting on paired donors, with incorporation or reduction of molecular oxygen; GO:0003674,molecular_function; GO:0005488,binding; GO:0046906,tetrapyrrole binding; GO:0048037,cofactor binding; GO:0097159,organic cyclic compound binding; GO:1901363,heterocyclic compound bindin…	PF00067.22:Cytochrome P450	--	--	--
MS.gene010449	1.07	2.31	4.55	0	0	0	2.09	1.17	0.62	3.98	6.06	0	5	12	26	0	0	0	10	6	3	19	32	0	chr5.3	11038551	11040486	+	--	--	K13250 translocon-associated protein subunit beta | (GenBank) translocon-associated protein beta family-like protein (A)	ko04141: Protein processing in endoplasmic reticulum	XP_013449457.1	RBOHC_SOLTU RecName: Full=Respiratory burst oxidase homolog protein C; EC=1.11.1.-; EC=1.6.3.-; AltName: Full=NADPH oxidase RBOHC; AltName: Full=StRBOHC;	At5g14030	GO:0016021,integral component of membrane; GO:0005886,plasma membrane; GO:0005509,calcium ion binding; GO:0016174,NAD(P)H oxidase activity; GO:0004601,peroxidase activity; GO:0003674,molecular_function; GO:0005488,binding; GO:0046872,metal ion binding; GO:0043167,ion binding; GO:0043169,cation binding; GO:0003824,catalytic activity; GO:0016491,oxidoreductase activity; GO:0016651,oxidoreductase ac…	PF05753.14:Translocon-associated protein beta (TRAPB)	--	--	--
MS.gene010472	5.8	5.58	1.86	5.03	1.95	4.52	14.99	6.21	10.71	15.39	27.12	182.97	28	30	11	27	10	24	74	33	54	76	148	825	chr5.2	11101153	11102736	+	--	--	K09338 homeobox-leucine zipper protein | (GenBank) homeobox leucine zipper protein (A)	--	GAU16599.1	ATB40_ARATH RecName: Full=Homeobox-leucine zipper protein ATHB-40; AltName: Full=HD-ZIP protein ATHB-40; AltName: Full=Homeodomain transcription factor ATHB-40;	At4g36740	GO:0005634,nucleus; GO:0003700,DNA-binding transcription factor activity; GO:0000981,DNA-binding transcription factor activity, RNA polymerase II-specific; GO:0043565,sequence-specific DNA binding; GO:0000976,transcription regulatory region sequence-specific DNA binding; GO:0045893,positive regulation of transcription, DNA-templated; GO:0009733,response to auxin; GO:0140110,transcription regulato…	PF00046.29:Homeodomain	HB-other	TF	HB->HB-other
MS.gene010548	14.69	18.38	19.83	0.3	4.19	2.25	6.14	11.09	9.65	1.78	13.58	0	89	124	147	2	27	15	38	74	61	11	93	0	chr5.1	12141426	12144526	+	--	--	K01726 gamma-carbonic anhydrase [EC:4.2.1.-] | (GenBank) gamma carbonic anhydrase-like protein (A)	--	XP_003612060.1	GCA1_ARATH RecName: Full=Gamma carbonic anhydrase 1, mitochondrial; Short=AtCA1; Short=GAMMA CA1; EC=4.2.1.-; Flags: Precursor;	At1g19580	GO:0031966,mitochondrial membrane; GO:0005747,mitochondrial respiratory chain complex I; GO:0005739,mitochondrion; GO:0005634,nucleus; GO:0045271,respiratory chain complex I; GO:0004089,carbonate dehydratase activity; GO:0046872,metal ion binding; GO:0009853,photorespiration; GO:0070207,protein homotrimerization; GO:0003674,molecular_function; GO:0003824,catalytic activity; GO:0016829,lyase activ…	PF00132.24:Bacterial transferase hexapeptide (six repeats)	--	--	--
MS.gene01056	31.27	83.52	36.88	234.26	114.75	29.87	611.85	733.4	1175.58	222.59	283.05	190.35	79	235	114	658	308	83	1580	2040	3100	575	808	449	chr2.4	70640300	70641115	+	--	--	--	--	XP_003593620.1	DRM1_PEA RecName: Full=Dormancy-associated protein 1 {ECO:0000303|PubMed:9684359}; Short=PsDRM1 {ECO:0000303|PubMed:9684359};	At2g33830	GO:0007275,multicellular organism development; GO:0008150,biological_process; GO:0032501,multicellular organismal process; GO:0032502,developmental process; GO:0048856,anatomical structure development	PF05564.12:Dormancy/auxin associated protein	--	--	--
MS.gene010578	5.33	9.3	6.65	21.34	14.76	13.44	25.27	13.88	23.98	23.3	15.12	13.67	53	103	81	236	156	147	257	152	249	237	170	127	chr5.1	12486645	12492192	+	--	--	K18204 D-2-hydroxyglutarate dehydrogenase [EC:1.1.99.39] | (GenBank) D-2-hydroxyglutarate dehydrogenase (A)	--	XP_003612098.2	D2HDH_ARATH RecName: Full=D-2-hydroxyglutarate dehydrogenase, mitochondrial; Short=AtD-2HGDH; EC=1.1.99.39; Flags: Precursor;	At4g36400	GO:0005739,mitochondrion; GO:0005886,plasma membrane; GO:0051990,(R)-2-hydroxyglutarate dehydrogenase activity; GO:0047545,2-hydroxyglutarate dehydrogenase activity; GO:0071949,FAD binding; GO:0006807,nitrogen compound metabolic process; GO:0009853,photorespiration; GO:0003674,molecular_function; GO:0003824,catalytic activity; GO:0016491,oxidoreductase activity; GO:0016614,oxidoreductase activity…	PF02913.19:FAD linked oxidases, C-terminal domain	--	--	--
MS.gene010625	60.09	95.08	30.61	81.91	106.77	37	142.87	173.51	112.55	741.79	415.4	352.65	223	393	139	338	421	151	542	709	436	2815	1742	1222	chr5.1	13247133	13247630	+	--	--	K03686 molecular chaperone DnaJ | (RefSeq) uncharacterized protein LOC107014433 isoform X1 (A)	--	AKA20389.1	DNJ11_ARATH RecName: Full=Chaperone protein dnaJ 11, chloroplastic; Short=AtDjC11; Short=AtJ11; Flags: Precursor;	At4g36040	GO:0009507,chloroplast; GO:0009570,chloroplast stroma; GO:0005634,nucleus; GO:0009536,plastid; GO:0005622,intracellular; GO:0005575,cellular_component; GO:0005623,cell; GO:0005737,cytoplasm; GO:0043231,intracellular membrane-bounded organelle; GO:0043226,organelle; GO:0043227,membrane-bounded organelle; GO:0043229,intracellular organelle; GO:0044424,intracellular part; GO:0044444,cytoplasmic part…	PF00226.31:DnaJ domain	--	--	--
MS.gene010627	1.07	6.25	3.06	64.08	4.03	2.92	38.78	6.57	21.81	97.44	60.92	198.22	4	26	14	266	16	12	148	27	85	372	257	691	chr5.1	13286701	13287201	-	--	--	K23051 NAD(P)H-quinone oxidoreductase subunit T, chloroplastic [EC:7.1.1.-] | (RefSeq) NAD(P)H-quinone oxidoreductase subunit T, chloroplastic (A)	--	XP_003612179.1	DNJ11_ARATH RecName: Full=Chaperone protein dnaJ 11, chloroplastic; Short=AtDjC11; Short=AtJ11; Flags: Precursor;	At4g36040	GO:0009507,chloroplast; GO:0009570,chloroplast stroma; GO:0005634,nucleus; GO:0009536,plastid; GO:0005622,intracellular; GO:0005575,cellular_component; GO:0005623,cell; GO:0005737,cytoplasm; GO:0043231,intracellular membrane-bounded organelle; GO:0043226,organelle; GO:0043227,membrane-bounded organelle; GO:0043229,intracellular organelle; GO:0044424,intracellular part; GO:0044444,cytoplasmic part…	PF00226.31:DnaJ domain	--	--	--
MS.gene010678	2.31	2.87	5.95	0	0.17	0	0	5.32	1.19	0.87	1.41	0	13	18	41	0	1	0	0	33	7	5	9	0	chr4.4	83069741	83078037	-	--	--	--	--	XP_013454882.1	BAG4_ARATH RecName: Full=BAG family molecular chaperone regulator 4; AltName: Full=Bcl-2-associated athanogene 4;	At3g51780	GO:0005737,cytoplasm; GO:0005829,cytosol; GO:0005783,endoplasmic reticulum; GO:0070971,endoplasmic reticulum exit site; GO:0000774,adenyl-nucleotide exchange factor activity; GO:0051087,chaperone binding; GO:0031072,heat shock protein binding; GO:0043268,positive regulation of potassium ion transport; GO:0050821,protein stabilization; GO:0006612,protein targeting to membrane; GO:0010119,regulatio…	PF02179.16:BAG domain	--	--	--
MS.gene010691	0	0.71	0	0.24	0.25	0	5.92	14.1	2.52	0.51	3.03	24.8	0	3	0	1	1	0	23	59	10	2	13	88	chr4.4	83183711	83184669	-	--	--	--	--	XP_013454869.1	--	At5g01300	--	PF01161.20:Phosphatidylethanolamine-binding protein	--	--	--
MS.gene010701	1.92	0.96	2.7	0.86	0.5	0.97	12.32	11.54	14.32	9.81	13.6	13.03	18	10	31	9	5	10	118	119	140	94	144	114	chr7.4	61008799	61013306	+	--	--	--	--	XP_013443372.1	Y3272_ARATH RecName: Full=Kelch repeat-containing protein At3g27220;	At1g51540_2	GO:0005768,endosome; GO:0005794,Golgi apparatus; GO:0005797,Golgi medial cisterna; GO:0016021,integral component of membrane; GO:0005802,trans-Golgi network; GO:0009061,anaerobic respiration; GO:0071456,cellular response to hypoxia; GO:0008152,metabolic process; GO:0006091,generation of precursor metabolites and energy; GO:0055114,oxidation-reduction process; GO:0008150,biological_process; GO:000…	PF13964.6:Kelch motif	--	--	--
MS.gene010749	1.79	1.51	1.28	3.12	7.26	14.95	2.08	3.05	0.21	0.33	3.17	2.63	16	15	14	31	69	147	19	30	2	3	32	22	chr7.4	59181460	59184343	-	--	--	K01184 polygalacturonase [EC:3.2.1.15] | (RefSeq) polygalacturonase-like (A)	ko00040: Pentose and glucuronate interconversions; ko01100: Metabolic pathways	XP_004513513.2	PGLR_PRUPE RecName: Full=Polygalacturonase; Short=PG; EC=3.2.1.15; AltName: Full=Pectinase; Flags: Precursor;	At2g43890	GO:0005618,cell wall; GO:0005576,extracellular region; GO:0004650,polygalacturonase activity; GO:0005975,carbohydrate metabolic process; GO:0071555,cell wall organization; GO:0009835,fruit ripening; GO:0003674,molecular_function; GO:0003824,catalytic activity; GO:0004553,hydrolase activity, hydrolyzing O-glycosyl compounds; GO:0016787,hydrolase activity; GO:0016798,hydrolase activity, acting on g…	PF00295.17:Glycosyl hydrolases family 28	--	--	--
MS.gene010834	2.65	1.62	1.16	31.11	27.65	17.66	3.99	12.22	6.36	20.2	13	23.14	28	19	15	365	310	205	43	142	70	218	155	228	chr7.2	54743805	54745220	-	--	--	K08237 hydroquinone glucosyltransferase [EC:2.4.1.218] | (GenBank) UDP-glucosyltransferase family protein (A)	--	XP_013442415.1	HQGT_RAUSE RecName: Full=Hydroquinone glucosyltransferase; EC=2.4.1.218; AltName: Full=Arbutin synthase;	At4g01070	GO:0050505,hydroquinone glucosyltransferase activity; GO:0003674,molecular_function; GO:0003824,catalytic activity; GO:0008194,UDP-glycosyltransferase activity; GO:0016740,transferase activity; GO:0016757,transferase activity, transferring glycosyl groups; GO:0016758,transferase activity, transferring hexosyl groups; GO:0035251,UDP-glucosyltransferase activity; GO:0046527,glucosyltransferase acti…	PF00201.18:UDP-glucoronosyl and UDP-glucosyl transferase	--	--	--
MS.gene010877	33.32	14.86	46.61	0.6	1.26	4.07	7.22	15.44	9.64	9.19	16.03	5.75	149	74	255	3	6	20	33	76	45	42	81	24	chr7.2	53832203	53832802	+	--	--	--	--	XP_003625763.1	ALB2_PEA RecName: Full=Albumin-2; AltName: Full=PA2;	--	GO:0005829,cytosol; GO:0005509,calcium ion binding; GO:0045735,nutrient reservoir activity; GO:0003674,molecular_function; GO:0005488,binding; GO:0046872,metal ion binding; GO:0043167,ion binding; GO:0043169,cation binding; GO:0005622,intracellular; GO:0005575,cellular_component; GO:0005623,cell; GO:0005737,cytoplasm; GO:0044424,intracellular part; GO:0044444,cytoplasmic part; GO:0044464,cell part	PF00045.19:Hemopexin	--	--	--
MS.gene010930	0	0	0	3.27	6.36	1.89	3.05	1.89	1.25	1.27	1.61	0	0	0	0	14	26	8	12	8	5	5	7	0	chr7.1	52183070	52183710	+	--	--	K14442 ATP-dependent RNA helicase DHX36 [EC:3.6.4.13] | (RefSeq) DExH-box ATP-dependent RNA helicase DExH6-like (A)	ko03018: RNA degradation	PNX75801.1	RNHX1_ARATH RecName: Full=Putative ribonuclease H protein At1g65750; EC=3.1.26.4;	At2g22350	GO:0046872,metal ion binding; GO:0003676,nucleic acid binding; GO:0004523,RNA-DNA hybrid ribonuclease activity; GO:0003674,molecular_function; GO:0005488,binding; GO:0043167,ion binding; GO:0043169,cation binding; GO:0097159,organic cyclic compound binding; GO:1901363,heterocyclic compound binding; GO:0003824,catalytic activity; GO:0004518,nuclease activity; GO:0004519,endonuclease activity; GO:0…	PF13456.6:Reverse transcriptase-like	--	--	--
MS.gene010989	237.72	165.85	289.61	46.67	49.44	117.48	77.36	74.02	79.15	53.34	54.11	103.56	2955	2296	4405	645	653	1606	983	1013	1027	678	760	1202	chr7.1	50813396	50815299	-	--	--	K01051 pectinesterase [EC:3.1.1.11] | (GenBank) pectinesterase/pectinesterase inhibitor (A)	ko00040: Pentose and glucuronate interconversions; ko01100: Metabolic pathways	XP_003622699.1	PME18_ARATH RecName: Full=Pectinesterase/pectinesterase inhibitor 18; AltName: Full=AtPMEpcrA; Contains: RecName: Full=Pectinesterase inhibitor 18; AltName: Full=Pectin methylesterase inhibitor 18; Contains: RecName: Full=Bifunctional pectinesterase 18/rRNA N-glycosylase; Short=PE 18; EC=3.1.1.11; EC=3.2.2.22; AltName: Full=Pectin methylesterase 18; AltName: Full=Pectin methylesterase 4; Short=At…	At1g11580	GO:0005618,cell wall; GO:0005829,cytosol; GO:0005576,extracellular region; GO:0016020,membrane; GO:0005774,vacuolar membrane; GO:0045330,aspartyl esterase activity; GO:0030599,pectinesterase activity; GO:0046910,pectinesterase inhibitor activity; GO:0030598,rRNA N-glycosylase activity; GO:0090729,toxin activity; GO:0042545,cell wall modification; GO:0050832,defense response to fungus; GO:0031640,…	PF01095.19:Pectinesterase	--	--	--
MS.gene011012	6.52	3	9.42	0.14	1.43	0.83	0	0.28	0.44	4.15	0.27	0	43	22	76	1	10	6	0	2	3	28	2	0	chr7.1	50179260	50180431	-	--	--	--	--	XP_020208412.1	--	--	--	PF03004.14:Plant transposase (Ptta/En/Spm family)	--	--	--
MS.gene011015	0.33	1.27	0.89	3.24	3.8	7.14	0.32	0.69	0	0.43	0.39	0	3	13	10	33	37	72	3	7	0	4	4	0	chr7.1	49878074	49879850	-	--	--	K23279 gallate 1-beta-glucosyltransferase [EC:2.4.1.136] | (RefSeq) putative UDP-glucose glucosyltransferase (A)	--	XP_013470035.1	GGT24_PUNGR RecName: Full=Gallate 1-beta-glucosyltransferase 84A24 {ECO:0000305}; EC=2.4.1.136 {ECO:0000269|PubMed:27227328}; AltName: Full=UDP-glucose:gallate glucosyltransferase {ECO:0000305}; AltName: Full=UDP-glycosyltransferase 84A24 {ECO:0000303|PubMed:27227328}; EC=2.4.1.120 {ECO:0000269|PubMed:27227328}; EC=2.4.1.170 {ECO:0000269|PubMed:27227328}; EC=2.4.1.177 {ECO:0000269|PubMed:27227328…	At4g15480	GO:0005737,cytoplasm; GO:0047250,4-hydroxybenzoate 4-O-beta-D-glucosyltransferase activity; GO:0050412,cinnamate beta-D-glucosyltransferase activity; GO:0047891,flavone 7-O-beta-glucosyltransferase activity; GO:0047913,gallate 1-beta-glucosyltransferase activity; GO:0050004,isoflavone 7-O-glucosyltransferase activity; GO:0050284,sinapate 1-glucosyltransferase activity; GO:0035251,UDP-glucosyltran…	PF00201.18:UDP-glucoronosyl and UDP-glucosyl transferase	--	--	--
MS.gene011022	0.76	1.02	1.24	2.15	1.9	0.8	8.75	2.17	7.97	3.45	7.14	4.86	6	9	12	19	16	7	71	19	66	28	64	36	chr7.1	49553303	49558805	+	--	--	--	--	XP_003622783.1	--	At2g26470	GO:0008233,peptidase activity; GO:0003697,single-stranded DNA binding; GO:0006974,cellular response to DNA damage stimulus; GO:0018142,protein-DNA covalent cross-linking; GO:0003674,molecular_function; GO:0003824,catalytic activity; GO:0016787,hydrolase activity; GO:0140096,catalytic activity, acting on a protein; GO:0003676,nucleic acid binding; GO:0003677,DNA binding; GO:0005488,binding; GO:009…	PF02586.14:SOS response associated peptidase (SRAP)	--	--	--
MS.gene011069	2.72	6.02	4	6.03	5.11	8.07	12.93	17.27	15.27	24.26	34.78	12.41	15	37	27	37	30	49	73	105	88	137	217	64	chr8.3	74139155	74140818	+	--	--	K14484 auxin-responsive protein IAA | (GenBank) auxin response factor (A)	ko04075: Plant hormone signal transduction	XP_003627047.1	IAA26_ARATH RecName: Full=Auxin-responsive protein IAA26; AltName: Full=Indoleacetic acid-induced protein 26; AltName: Full=Phytochrome-associated protein 1;	At3g16500	GO:0005634,nucleus; GO:0003700,DNA-binding transcription factor activity; GO:0042802,identical protein binding; GO:0009734,auxin-activated signaling pathway; GO:0009733,response to auxin; GO:0140110,transcription regulator activity; GO:0003674,molecular_function; GO:0005515,protein binding; GO:0005488,binding; GO:0007165,signal transduction; GO:0007154,cell communication; GO:0008150,biological_pr…	PF02309.16:AUX/IAA family	AUX/IAA	TR	AUX/IAA
MS.gene011070	0.9	9.49	4.28	0.81	7.14	5.75	6.9	1.89	1.56	0.18	0.56	0	10	117	58	10	84	70	78	23	18	2	7	0	chr8.3	74133547	74137190	+	--	--	K00844 hexokinase [EC:2.7.1.1] | (GenBank) hexokinase (A)	ko00010: Glycolysis / Gluconeogenesis; ko00051: Fructose and mannose metabolism; ko00052: Galactose metabolism; ko00500: Starch and sucrose metabolism; ko00520: Amino sugar and nucleotide sugar metabolism; ko00524: Neomycin, kanamycin and gentamicin biosynthesis; ko01100: Metabolic pathways; ko01110: Biosynthesis of secondary metabolites; ko01200: Carbon metabolism	XP_003627048.1	HXK1_TOBAC RecName: Full=Hexokinase-1; EC=2.7.1.1 {ECO:0000250|UniProtKB:Q6Q8A5}; AltName: Full=NtHxK1;	At4g29130	GO:0009707,chloroplast outer membrane; GO:0005829,cytosol; GO:0016021,integral component of membrane; GO:0005739,mitochondrion; GO:0005524,ATP binding; GO:0008865,fructokinase activity; GO:0004340,glucokinase activity; GO:0005536,glucose binding; GO:0019158,mannokinase activity; GO:0001678,cellular glucose homeostasis; GO:0051156,glucose 6-phosphate metabolic process; GO:0006096,glycolytic proces…	PF03727.16:Hexokinase	--	--	--
MS.gene011077	47.29	41.7	297.88	9.21	31.01	66.13	19.88	22.33	14.07	1.17	5.89	0	277	272	2135	60	193	426	119	144	86	7	39	0	chr8.3	74068314	74069779	+	--	--	K20728 vegetative storage protein 2 | (RefSeq) vegetative storage protein 2-like (A)	ko04016: MAPK signaling pathway - plant	XP_003627058.1	VSPA_SOYBN RecName: Full=Stem 28 kDa glycoprotein; AltName: Full=Vegetative storage protein A; Flags: Precursor;	At4g25150	GO:0045735,nutrient reservoir activity; GO:0003674,molecular_function	PF03767.14:HAD superfamily, subfamily IIIB (Acid phosphatase)	--	--	--
MS.gene011080	1.27	13.21	5.06	0	0.05	0.05	2.18	0.18	0.68	0.35	0.76	3.26	25	290	122	0	1	1	44	4	14	7	17	60	chr8.3	74025469	74030513	-	--	--	K16224 senescence-induced receptor-like serine/threonine-protein kinase | (RefSeq) senescence-induced receptor-like serine/threonine-protein kinase (A)	ko04016: MAPK signaling pathway - plant; ko04626: Plant-pathogen interaction	XP_003627062.2	Y1570_ARATH RecName: Full=Probable LRR receptor-like serine/threonine-protein kinase At1g05700; EC=2.7.11.1; Flags: Precursor;	At1g05700	GO:0016021,integral component of membrane; GO:0005524,ATP binding; GO:0106310,NA; GO:0106311,NA; GO:0000166,nucleotide binding; GO:0003674,molecular_function; GO:0005488,binding; GO:0008144,drug binding; GO:0017076,purine nucleotide binding; GO:0030554,adenyl nucleotide binding; GO:0032553,ribonucleotide binding; GO:0032555,purine ribonucleotide binding; GO:0032559,adenyl ribonucleotide binding; …	PF12819.7:Malectin-like domain	--	--	--
MS.gene01110	0	0	0.06	1.34	3.85	6.23	6.33	4.46	0.29	2.11	0.07	0	0	0	1	20	55	92	87	66	4	29	1	0	chr2.1	74646265	74656939	-	--	--	K25193 serine decarboxylase [EC:4.1.1.-] | (GenBank) serine decarboxylase (A)	ko00564: Glycerophospholipid metabolism	XP_003593129.1	SDC1_ARATH RecName: Full=Serine decarboxylase; Short=AtSDC; EC=4.1.1.-; AltName: Full=Protein EMBRYO DEFECTIVE 1075; AltName: Full=Serine decarboxylase 1; Short=AtSDC1;	At1g43710	GO:0005829,cytosol; GO:0005886,plasma membrane; GO:0030170,pyridoxal phosphate binding; GO:0102705,serine decarboxylase activity; GO:0019752,carboxylic acid metabolic process; GO:0006580,ethanolamine metabolic process; GO:0003674,molecular_function; GO:0005488,binding; GO:0008144,drug binding; GO:0019842,vitamin binding; GO:0036094,small molecule binding; GO:0043167,ion binding; GO:0043168,anion …	PF00282.19:Pyridoxal-dependent decarboxylase conserved domain	--	--	--
MS.gene011103	0	0	0	0	0.51	0.49	3.16	2.28	2.07	1.93	0.95	0	0	0	0	0	3	3	18	14	12	11	6	0	chr8.3	73740633	73745108	+	--	--	K15128 mediator of RNA polymerase II transcription subunit 6 | (GenBank) mediator of RNA polymerase II transcription subunit 6 (A)	--	XP_013444227.1	MED6_ARATH RecName: Full=Mediator of RNA polymerase II transcription subunit 6;	At3g21350	GO:0070847,core mediator complex; GO:0016592,mediator complex; GO:0003713,transcription coactivator activity; GO:0006357,regulation of transcription by RNA polymerase II; GO:0140110,transcription regulator activity; GO:0003674,molecular_function; GO:0003712,transcription coregulator activity; GO:0008152,metabolic process; GO:0006366,transcription by RNA polymerase II; GO:0006139,nucleobase-contai…	PF04934.14:MED6 mediator sub complex component	MED6	TR	MED6
MS.gene011134	2.46	2.99	1.43	17.35	9.08	7.82	6.35	5.42	22.01	2.23	18.78	0.75	14	19	10	110	55	49	37	34	131	13	121	4	chr8.3	73350579	73357152	-	--	--	K16196 eukaryotic translation initiation factor 2-alpha kinase 4 [EC:2.7.11.1] | (RefSeq) eIF-2-alpha kinase GCN2-like (A)	ko04141: Protein processing in endoplasmic reticulum	XP_013444254.1	--	At1g51730	GO:0005844,polysome; GO:0002181,cytoplasmic translation; GO:0008152,metabolic process; GO:0006412,translation; GO:0006518,peptide metabolic process; GO:0006807,nitrogen compound metabolic process; GO:0008150,biological_process; GO:0009058,biosynthetic process; GO:0009059,macromolecule biosynthetic process; GO:0009987,cellular process; GO:0010467,gene expression; GO:0019538,protein metabolic proce…	PF05773.22:RWD domain	--	--	--
MS.gene01115	0.22	0	0	0.4	1.37	0.41	0.88	15.88	15.04	8.77	17.66	0	2	0	0	4	13	4	8	156	140	80	178	0	chr2.1	74575105	74577540	+	--	--	K17500 integrin-linked kinase-associated serine/threonine phosphatase 2C [EC:3.1.3.16] | (RefSeq) WAT1-related protein At3g18200-like (A)	--	XP_003593115.1	WTR6_ARATH RecName: Full=WAT1-related protein At1g25270;	At1g25270	GO:0016021,integral component of membrane; GO:0005886,plasma membrane; GO:0022857,transmembrane transporter activity; GO:0003674,molecular_function; GO:0005215,transporter activity; GO:0005575,cellular_component; GO:0016020,membrane; GO:0031224,intrinsic component of membrane; GO:0044425,membrane part; GO:0005623,cell; GO:0044464,cell part; GO:0071944,cell periphery	PF00892.20:EamA-like transporter family	--	--	--
MS.gene011157	1.08	0.19	1.41	0.19	2.24	2.95	6.13	6.48	9.52	5.49	3.25	13.89	5	1	8	1	11	15	29	33	46	26	17	60	chr8.3	73081398	73082018	+	--	--	K20043 clathrin coat assembly protein AP180 | (RefSeq) putative clathrin assembly protein At5g35200 (A)	--	XP_013444275.1	DOF17_ARATH RecName: Full=Dof zinc finger protein DOF1.7; Short=AtDOF1.7;	At1g51700	GO:0005634,nucleus; GO:0003700,DNA-binding transcription factor activity; GO:0046872,metal ion binding; GO:0000976,transcription regulatory region sequence-specific DNA binding; GO:0006355,regulation of transcription, DNA-templated; GO:0010200,response to chitin; GO:0140110,transcription regulator activity; GO:0003674,molecular_function; GO:0005488,binding; GO:0043167,ion binding; GO:0043169,cati…	PF02701.15:Dof domain, zinc finger	C2C2-Dof	TF	C2C2->C2C2-Dof
MS.gene011159	0.2	2.01	1.16	0.73	3.44	2.22	17.5	8.31	15.78	4.57	4.32	0	1	11	7	4	18	12	88	45	81	23	24	0	chr8.3	73039391	73041041	-	--	--	K13248 pyridoxal phosphate phosphatase PHOSPHO2 [EC:3.1.3.74] | (GenBank) 2,3-diketo-5-methylthio-1-phosphopentane phosphatase (A)	ko00750: Vitamin B6 metabolism; ko01100: Metabolic pathways; ko01240: Biosynthesis of cofactors	XP_013444282.1	PPSP2_ARATH RecName: Full=Inorganic pyrophosphatase 2; Short=AtPPsPase2; Short=PPi phosphatase 2; Short=Pyrophosphate-specific phosphatase 2; EC=3.6.1.1;	At1g17710	GO:0004427,inorganic diphosphatase activity; GO:0046872,metal ion binding; GO:0016791,phosphatase activity; GO:0052731,phosphocholine phosphatase activity; GO:0052732,phosphoethanolamine phosphatase activity; GO:0051262,protein tetramerization; GO:0003674,molecular_function; GO:0003824,catalytic activity; GO:0016462,pyrophosphatase activity; GO:0016787,hydrolase activity; GO:0016817,hydrolase act…	PF06888.12:Putative Phosphatase	--	--	--
MS.gene011173	0.32	0.23	0.19	0.63	1.45	1.4	0.34	0.26	0.33	1.22	0.98	0	11	9	8	24	53	53	12	10	12	43	38	0	chr8.3	72880217	72889392	-	--	--	K05666 ATP-binding cassette, subfamily C (CFTR/MRP), member 2 | (RefSeq) uncharacterized protein LOC109812631 (A)	ko02010: ABC transporters	CBI35971.3	AB8C_ARATH RecName: Full=ABC transporter C family member 8; Short=ABC transporter ABCC.8; Short=AtABCC8; EC=7.6.2.2; AltName: Full=ATP-energized glutathione S-conjugate pump 6; AltName: Full=Glutathione S-conjugate-transporting ATPase 6; AltName: Full=Multidrug resistance-associated protein 6; Flags: Precursor;	At3g21250	GO:0005829,cytosol; GO:0016021,integral component of membrane; GO:0016020,membrane; GO:0000325,plant-type vacuole; GO:0005774,vacuolar membrane; GO:0008559,xenobiotic transmembrane transporting ATPase activity; GO:0005524,ATP binding; GO:0042626,ATPase activity, coupled to transmembrane movement of substances; GO:0055085,transmembrane transport; GO:0003674,molecular_function; GO:0042623,ATPase ac…	PF00005.27:ABC transporter	--	--	--
MS.gene011174	178.03	179.38	171.86	44.44	89.61	120.42	47.1	34.87	45.28	6.39	8.11	2.82	1827	2050	2158	507	977	1359	494	394	485	67	94	27	chr8.3	72875173	72878238	+	--	--	K01495 GTP cyclohydrolase IA [EC:3.5.4.16] | (GenBank) GTP cyclohydrolase I 1 (A)	ko00790: Folate biosynthesis; ko01100: Metabolic pathways; ko01240: Biosynthesis of cofactors	XP_013444296.1	GCH1_SOLLC RecName: Full=GTP cyclohydrolase 1 {ECO:0000305}; EC=3.5.4.16 {ECO:0000269|PubMed:12221287}; AltName: Full=GTP cyclohydrolase I {ECO:0000303|PubMed:12221287};	At3g07270	GO:0005737,cytoplasm; GO:0005525,GTP binding; GO:0003934,GTP cyclohydrolase I activity; GO:0042803,protein homodimerization activity; GO:0008270,zinc ion binding; GO:0035998,7,8-dihydroneopterin 3'-triphosphate biosynthetic process; GO:0006729,tetrahydrobiopterin biosynthetic process; GO:0046654,tetrahydrofolate biosynthetic process; GO:0000166,nucleotide binding; GO:0001882,nucleoside binding; G…	PF01227.22:GTP cyclohydrolase I	--	--	--
MS.gene011186	4.58	6.37	3.18	1.2	1.71	1.89	93.36	18.11	7.56	19.34	17.88	0.23	86	133	73	25	34	39	1790	374	148	371	379	4	chr8.3	72721763	72727296	-	--	--	K12309 beta-galactosidase [EC:3.2.1.23] | (RefSeq) beta-galactosidase 2 (A)	ko00052: Galactose metabolism; ko00511: Other glycan degradation; ko00531: Glycosaminoglycan degradation; ko00600: Sphingolipid metabolism; ko00604: Glycosphingolipid biosynthesis - ganglio series; ko01100: Metabolic pathways	XP_013444317.1	BGAL1_ARATH RecName: Full=Beta-galactosidase 1; Short=Lactase 1; EC=3.2.1.23; Flags: Precursor;	At3g13750	GO:0048046,apoplast; GO:0005618,cell wall; GO:0005829,cytosol; GO:0009505,plant-type cell wall; GO:0009506,plasmodesma; GO:0005773,vacuole; GO:0004565,beta-galactosidase activity; GO:0030246,carbohydrate binding; GO:0005975,carbohydrate metabolic process; GO:0003674,molecular_function; GO:0003824,catalytic activity; GO:0004553,hydrolase activity, hydrolyzing O-glycosyl compounds; GO:0015925,galac…	PF01301.19:Glycosyl hydrolases family 35	--	--	--
MS.gene011195	0.47	0.47	0.85	0	0	0	0	0	0	0	0	0	9	10	20	0	0	0	0	0	0	0	0	0	chr8.2	76685113	76689859	+	--	--	K13430 serine/threonine-protein kinase PBS1 [EC:2.7.11.1] | (RefSeq) serine/threonine-protein kinase PBS1 (A)	ko04626: Plant-pathogen interaction	XP_013444324.1	ALE2_ARATH RecName: Full=Receptor-like serine/threonine-protein kinase ALE2; EC=2.7.11.1; AltName: Full=Protein ABNORMAL LEAF SHAPE 2; Flags: Precursor;	At2g20300	GO:0016021,integral component of membrane; GO:0005886,plasma membrane; GO:0005524,ATP binding; GO:0016301,kinase activity; GO:0106310,NA; GO:0004674,protein serine/threonine kinase activity; GO:0106311,NA; GO:0030154,cell differentiation; GO:0090558,plant epidermis development; GO:1905393,plant organ formation; GO:0046777,protein autophosphorylation; GO:0010068,protoderm histogenesis; GO:0000166,…	PF07714.17:Protein tyrosine kinase	--	--	--
MS.gene01121	2.74	4.1	2.56	0.82	7.73	1.07	7.4	9.95	15.74	10.97	10.96	0.42	21	35	24	7	63	9	58	84	126	86	95	3	chr2.1	74500760	74504170	+	--	--	K03841 fructose-1,6-bisphosphatase I [EC:3.1.3.11] | (GenBank) fructose-1,6-bisphosphatase, cytosolic-like protein (A)	ko00010: Glycolysis / Gluconeogenesis; ko00030: Pentose phosphate pathway; ko00051: Fructose and mannose metabolism; ko00710: Carbon fixation in photosynthetic organisms; ko01100: Metabolic pathways; ko01110: Biosynthesis of secondary metabolites; ko01200: Carbon metabolism	XP_003593121.1	F16P2_BETVU RecName: Full=Fructose-1,6-bisphosphatase, cytosolic; Short=FBPase; EC=3.1.3.11; AltName: Full=D-fructose-1,6-bisphosphate 1-phosphohydrolase;	At1g43670	GO:0005737,cytoplasm; GO:0042132,fructose 1,6-bisphosphate 1-phosphatase activity; GO:0046872,metal ion binding; GO:0005975,carbohydrate metabolic process; GO:0003674,molecular_function; GO:0003824,catalytic activity; GO:0016787,hydrolase activity; GO:0016788,hydrolase activity, acting on ester bonds; GO:0016791,phosphatase activity; GO:0019203,carbohydrate phosphatase activity; GO:0042578,phosph…	PF00316.20:Fructose-1-6-bisphosphatase, N-terminal domain	C3H	TF	C3H
MS.gene011244	15.07	11.77	24.33	1.08	20.1	42.01	76.3	54.81	45.83	1.6	0.48	0	276	240	545	22	391	846	1428	1105	876	30	10	0	chr8.2	75937496	75942505	+	--	--	K15718 linoleate 9S-lipoxygenase [EC:1.13.11.58] | (GenBank) seed linoleate 9S-lipoxygenase (A)	ko00591: Linoleic acid metabolism	XP_003627173.1	LOX3_SOYBN RecName: Full=Seed linoleate 9S-lipoxygenase-3; EC=1.13.11.58; AltName: Full=Lipoxygenase-3; Short=L-3;	At1g55020	GO:0005737,cytoplasm; GO:1990136,linoleate 9S-lipoxygenase activity; GO:0046872,metal ion binding; GO:0016702,oxidoreductase activity, acting on single donors with incorporation of molecular oxygen, incorporation of two atoms of oxygen; GO:0006633,fatty acid biosynthetic process; GO:0034440,lipid oxidation; GO:0031408,oxylipin biosynthetic process; GO:0003674,molecular_function; GO:0003824,cataly…	PF00305.19:Lipoxygenase	--	--	--
MS.gene011270	1.2	1.24	1.73	1.58	0.52	0.67	8.75	12.82	31.19	4.42	6.04	4.15	13	15	23	19	6	8	97	153	353	49	74	42	chr8.2	75338503	75342431	-	--	--	K15121 solute carrier family 25, member 44 | (RefSeq) uncharacterized protein LOC112037286 (A)	--	XP_003622863.2	--	--	GO:0016021,integral component of membrane; GO:0016020,membrane; GO:0005575,cellular_component; GO:0031224,intrinsic component of membrane; GO:0044425,membrane part	PF13962.6:Domain of unknown function	--	--	--
MS.gene011279	2.53	4.32	2.49	4.56	3.46	1.73	10.41	15.19	17.48	4.34	3.48	4.34	20	38	24	40	29	15	84	132	144	35	31	32	chr8.2	75078634	75079692	-	--	--	K15121 solute carrier family 25, member 44 | (GenBank) substrate carrier family protein (A)	--	XP_013444416.1	FOLT1_ARATH RecName: Full=Folate transporter 1, chloroplastic; Short=AtFOLT1;	At1g72820	GO:0009507,chloroplast; GO:0009941,chloroplast envelope; GO:0031969,chloroplast membrane; GO:0016021,integral component of membrane; GO:0015230,FAD transmembrane transporter activity; GO:0008517,folic acid transmembrane transporter activity; GO:0003674,molecular_function; GO:0005215,transporter activity; GO:0022857,transmembrane transporter activity; GO:0008509,anion transmembrane transporter act…	PF00153.27:Mitochondrial carrier protein	--	--	--
MS.gene011301	0	0	0	5.67	2.21	3.73	1.58	0	0	6.6	0.52	2.98	0	0	0	43	16	28	11	0	0	46	4	19	chr8.2	74742751	74745626	+	--	--	K23901 calumenin | (RefSeq) hypothetical protein (A)	--	PNX96509.1	CML12_ARATH RecName: Full=Calmodulin-like protein 12 {ECO:0000303|Ref.7}; AltName: Full=Touch-induced calmodulin-related protein 3 {ECO:0000303|PubMed:2302732};	At5g08580	GO:0005829,cytosol; GO:0009506,plasmodesma; GO:0005774,vacuolar membrane; GO:0005509,calcium ion binding; GO:0003729,mRNA binding; GO:0071456,cellular response to hypoxia; GO:0009646,response to absence of light; GO:0009612,response to mechanical stimulus; GO:0009652,thigmotropism; GO:0003674,molecular_function; GO:0005488,binding; GO:0046872,metal ion binding; GO:0043167,ion binding; GO:0043169,…	PF00036.32:EF hand	--	--	--
MS.gene011303	0.16	0.44	0	2.06	3.7	1.04	3.21	1.93	5.02	7.05	2.32	5.62	1	3	0	14	24	7	20	13	32	44	16	32	chr8.2	74691319	74693292	-	--	--	K23901 calumenin | (GenBank) calcium-binding EF hand-like protein (A)	--	XP_003627249.1	--	At5g08580	GO:0005783,endoplasmic reticulum; GO:0005509,calcium ion binding; GO:0003674,molecular_function; GO:0005488,binding; GO:0046872,metal ion binding; GO:0043167,ion binding; GO:0043169,cation binding; GO:0005622,intracellular; GO:0005575,cellular_component; GO:0005623,cell; GO:0005737,cytoplasm; GO:0043231,intracellular membrane-bounded organelle; GO:0012505,endomembrane system; GO:0043226,organelle…	PF13202.6:EF hand	--	--	--
MS.gene01132	2.35	1.25	1.68	0.95	2.97	1.13	0.61	0.91	1.19	0.14	0.08	0	49	29	43	22	66	26	13	21	26	3	2	0	chr2.1	74378610	74384387	-	--	--	K00430 peroxidase [EC:1.11.1.7] | (GenBank) class III peroxidase (A)	ko00940: Phenylpropanoid biosynthesis; ko01100: Metabolic pathways; ko01110: Biosynthesis of secondary metabolites	XP_003593137.1	CAP4_ARATH RecName: Full=Putative clathrin assembly protein At1g03050;	At1g03050	GO:0005905,clathrin-coated pit; GO:0030136,clathrin-coated vesicle; GO:0005794,Golgi apparatus; GO:0090406,pollen tube; GO:0090404,pollen tube tip; GO:0005545,1-phosphatidylinositol binding; GO:0032050,clathrin heavy chain binding; GO:0005546,phosphatidylinositol-4,5-bisphosphate binding; GO:0000149,SNARE binding; GO:0048268,clathrin coat assembly; GO:0072583,clathrin-dependent endocytosis; GO:00…	PF07651.16:ANTH domain	--	--	--
MS.gene011325	7.91	11.47	14.85	8.63	6.11	4.67	5.62	3.07	2.65	2.05	2.33	3.69	117	189	269	142	96	76	85	50	41	31	39	51	chr8.4	21194643	21196628	-	--	--	K01176 alpha-amylase [EC:3.2.1.1] | (RefSeq) alpha-amylase isozyme 2A (A)	ko00500: Starch and sucrose metabolism; ko01100: Metabolic pathways; ko01110: Biosynthesis of secondary metabolites	XP_013457757.1	LRKS1_ARATH RecName: Full=L-type lectin-domain containing receptor kinase S.1 {ECO:0000303|PubMed:19773388}; Short=LecRK-S.1 {ECO:0000303|PubMed:19773388}; EC=2.7.11.1 {ECO:0000255|PROSITE-ProRule:PRU00159}; Flags: Precursor;	At1g15530	GO:0016021,integral component of membrane; GO:0005886,plasma membrane; GO:0005773,vacuole; GO:0005524,ATP binding; GO:0030246,carbohydrate binding; GO:0106310,NA; GO:0106311,NA; GO:0004675,transmembrane receptor protein serine/threonine kinase activity; GO:0042742,defense response to bacterium; GO:0002229,defense response to oomycetes; GO:0000166,nucleotide binding; GO:0003674,molecular_function;…	PF00139.19:Legume lectin domain	--	--	--
MS.gene011339	10.59	23.28	111.08	4.47	0.61	2.95	59.82	7.07	3.31	4.23	21.04	14.35	49	120	629	23	3	15	283	36	16	20	110	62	chr8.4	21342309	21343473	+	--	--	--	--	XP_013457732.1	NRT31_ARATH RecName: Full=High-affinity nitrate transporter 3.1; AltName: Full=Protein WOUND-RESPONSIVE 3; Flags: Precursor;	At5g50200	GO:0016021,integral component of membrane; GO:0005886,plasma membrane; GO:0015112,nitrate transmembrane transporter activity; GO:0042128,nitrate assimilation; GO:0015706,nitrate transport; GO:0010167,response to nitrate; GO:0009611,response to wounding; GO:0003674,molecular_function; GO:0005215,transporter activity; GO:0022857,transmembrane transporter activity; GO:0008509,anion transmembrane tra…	PF16974.5:High-affinity nitrate transporter accessory	--	--	--
MS.gene011340	39.33	31.43	62.34	11.66	1.83	4.32	22.41	15.11	6.42	12.26	4.59	46.98	182	162	353	60	9	22	106	77	31	58	24	203	chr8.4	21351960	21352696	+	--	--	--	--	XP_013457732.1	NRT31_ARATH RecName: Full=High-affinity nitrate transporter 3.1; AltName: Full=Protein WOUND-RESPONSIVE 3; Flags: Precursor;	At5g50200	GO:0016021,integral component of membrane; GO:0005886,plasma membrane; GO:0015112,nitrate transmembrane transporter activity; GO:0042128,nitrate assimilation; GO:0015706,nitrate transport; GO:0010167,response to nitrate; GO:0009611,response to wounding; GO:0003674,molecular_function; GO:0005215,transporter activity; GO:0022857,transmembrane transporter activity; GO:0008509,anion transmembrane tra…	PF16974.5:High-affinity nitrate transporter accessory	--	--	--
MS.gene01136	289.69	238.6	331.54	247.74	291.94	261.28	149	216.41	129.1	55.19	54.62	32.04	3070	2816	4299	2919	3287	3045	1614	2525	1428	598	654	317	chr2.1	74349826	74351247	-	--	--	K18823 soyasaponin III rhamnosyltransferase [EC:2.4.1.273] | (GenBank) UDP-glucosyltransferase family protein (A)	--	XP_003593142.1	SGT3_SOYBN RecName: Full=Soyasaponin III rhamnosyltransferase; EC=2.4.1.273 {ECO:0000269|PubMed:20350545}; AltName: Full=Soyasaponin glycosyltransferase 3; AltName: Full=UDP-rhamnose:soyasaponin III-rhamnosyltransferase;	At2g22590	GO:0043231,intracellular membrane-bounded organelle; GO:0102241,soyasaponin III rhamnosyltransferase activity; GO:0008194,UDP-glycosyltransferase activity; GO:0003674,molecular_function; GO:0003824,catalytic activity; GO:0016740,transferase activity; GO:0016757,transferase activity, transferring glycosyl groups; GO:0016758,transferase activity, transferring hexosyl groups; GO:0005622,intracellula…	PF00201.18:UDP-glucoronosyl and UDP-glucosyl transferase	--	--	--
MS.gene011364	18.68	1.54	0.7	2.32	36.89	26.15	46.52	64.28	95.24	115.01	35.89	41.32	152	14	7	21	319	234	387	576	809	957	330	314	chr8.4	21607223	21610640	-	--	--	K10523 speckle-type POZ protein | (RefSeq) hypothetical protein (A)	--	XP_003608891.1	BT2_ARATH RecName: Full=BTB/POZ and TAZ domain-containing protein 2; AltName: Full=BTB and TAZ domain protein 2;	At3g48360	GO:0005737,cytoplasm; GO:0005634,nucleus; GO:0005516,calmodulin binding; GO:0046872,metal ion binding; GO:0009738,abscisic acid-activated signaling pathway; GO:0009734,auxin-activated signaling pathway; GO:0007623,circadian rhythm; GO:0051973,positive regulation of telomerase activity; GO:0016567,protein ubiquitination; GO:0006355,regulation of transcription, DNA-templated; GO:0009737,response to…	PF00651.31:BTB/POZ domain	TAZ	TR	TAZ
MS.gene01137	7.41	28.82	37.1	6.83	79.46	30.66	18.77	3.02	5	4.46	4.37	0.41	78	338	478	80	889	355	202	35	55	48	52	4	chr2.1	74340036	74341448	-	--	--	K18823 soyasaponin III rhamnosyltransferase [EC:2.4.1.273] | (RefSeq) soyasaponin III rhamnosyltransferase-like (A)	--	XP_003593143.1	SGT3_SOYBN RecName: Full=Soyasaponin III rhamnosyltransferase; EC=2.4.1.273 {ECO:0000269|PubMed:20350545}; AltName: Full=Soyasaponin glycosyltransferase 3; AltName: Full=UDP-rhamnose:soyasaponin III-rhamnosyltransferase;	At2g22590	GO:0043231,intracellular membrane-bounded organelle; GO:0102241,soyasaponin III rhamnosyltransferase activity; GO:0008194,UDP-glycosyltransferase activity; GO:0003674,molecular_function; GO:0003824,catalytic activity; GO:0016740,transferase activity; GO:0016757,transferase activity, transferring glycosyl groups; GO:0016758,transferase activity, transferring hexosyl groups; GO:0005622,intracellula…	PF00201.18:UDP-glucoronosyl and UDP-glucosyl transferase	--	--	--
MS.gene011370	8.26	13.18	6.39	42.4	26.73	13.52	17.47	48.36	37.31	33.12	32.11	1.97	130	231	123	742	447	234	281	838	613	533	571	29	chr8.4	21693868	21697511	+	--	--	K16865 programmed cell death protein 4 | (RefSeq) hypothetical protein (A)	--	XP_003608913.2	MRF1_ARATH RecName: Full=MA3 DOMAIN-CONTAINING TRANSLATION REGULATORY FACTOR 1 {ECO:0000303|PubMed:29084871}; AltName: Full=MA3 domain-containing protein 6 {ECO:0000303|PubMed:24041411};	At5g63190	GO:0005829,cytosol; GO:0005634,nucleus; GO:0003729,mRNA binding; GO:0043022,ribosome binding; GO:0045892,negative regulation of transcription, DNA-templated; GO:0006417,regulation of translation; GO:0009646,response to absence of light; GO:0090549,response to carbon starvation; GO:0003674,molecular_function; GO:0003676,nucleic acid binding; GO:0003723,RNA binding; GO:0005488,binding; GO:0097159,o…	PF02847.17:MA3 domain	--	--	--
[truncated: 6,219 more rows]
