# Supplementary material for: Genome-wide transcriptomic analysis identifies candidate genes involved in jasmonic acid-mediated salt tolerance of alfalfa
Source: PeerJ. 2023 May 5;11:e15324. doi: 10.7717/peerj.15324 (PMC10166079; doi:10.7717/peerj.15324)
Supplement: Supplemental Information 3 [file peerj-11-15324-s003.xlsx]

## Sheet: Sheet1
ID	C/S regulated	S/JS regulated	KEGG	KEGG pathway	NR	Swissprot	KOG	GO	Pfam	TF-Family	TF-Category	TF-Classification
MS.gene002145	up	down	K19600 tubby and related proteins | (GenBank) tubby-F-box-like protein (A)	--	XP_003593111.1	TLP8_ORYSJ RecName: Full=Tubby-like F-box protein 8; Short=OsTLP8; AltName: Full=Tubby-like F-box protein 1; Short=OsTLP1;	At1g25280	--	PF01167.18:Tub family	TUB	TF	TUB
MS.gene002414	up	down	K01466 allantoinase [EC:3.5.2.5] | (GenBank) allantoinase (A)	ko00230: Purine metabolism; ko01100: Metabolic pathways	XP_003593522.1	ALN_ARATH RecName: Full=Allantoinase; Short=AtALN; EC=3.5.2.5;	YIR027c	GO:0005737,cytoplasm; GO:0005783,endoplasmic reticulum; GO:0004038,allantoinase activity; GO:0050897,cobalt ion binding; GO:0008270,zinc ion binding; GO:0000256,allantoin catabolic process; GO:0006995,cellular response to nitrogen starvation; GO:0006145,purine nucleobase catabolic process; GO:0010136,ureide catabolic process; GO:0003674,molecular_function; GO:0003824,catalytic activity; GO:001678…	PF01979.20:Amidohydrolase family	--	--	--
MS.gene002661	up	down	K01230 mannosyl-oligosaccharide alpha-1,2-mannosidase [EC:3.2.1.113] | (RefSeq) mannosyl-oligosaccharide 1,2-alpha-mannosidase MNS1 (A)	ko00510: N-Glycan biosynthesis; ko00513: Various types of N-glycan biosynthesis; ko01100: Metabolic pathways; ko04141: Protein processing in endoplasmic reticulum	XP_020203984.1	--	At3g17450	GO:0005634,nucleus; GO:0003677,DNA binding; GO:0008878,glucose-1-phosphate adenylyltransferase activity; GO:0046872,metal ion binding; GO:0046983,protein dimerization activity; GO:0005978,glycogen biosynthetic process; GO:0003674,molecular_function; GO:0003676,nucleic acid binding; GO:0005488,binding; GO:0097159,organic cyclic compound binding; GO:1901363,heterocyclic compound binding; GO:0003824…	PF04937.15:Protein of unknown function (DUF 659)	--	--	--
MS.gene004548	up	down	K12862 pleiotropic regulator 1 | (GenBank) PP1/PP2A phosphatase pleiotropic regulator PRL1 (A)	ko03040: Spliceosome	XP_013463226.1	PRL2_ARATH RecName: Full=Protein pleiotropic regulator PRL2;	At3g16650	GO:0071013,catalytic step 2 spliceosome; GO:0080008,Cul4-RING E3 ubiquitin ligase complex; GO:0000974,Prp19 complex; GO:0000398,mRNA splicing, via spliceosome; GO:0000375,RNA splicing, via transesterification reactions; GO:0000377,RNA splicing, via transesterification reactions with bulged adenosine as nucleophile; GO:0008152,metabolic process; GO:0006139,nucleobase-containing compound metabolic …	PF00400.32:WD domain, G-beta repeat	--	--	--
MS.gene004787	up	down	--	--	XP_003590760.1	SEOB_ARATH RecName: Full=Protein SIEVE ELEMENT OCCLUSION B {ECO:0000303|PubMed:20932300}; Short=AtSEOb {ECO:0000303|PubMed:20932300}; AltName: Full=Protein SIEVE ELEMENT OCCLUSION-RELATED 1 {ECO:0000303|PubMed:22470058}; Short=AtSEOR1 {ECO:0000303|PubMed:22470058};	At3g01680	GO:0042803,protein homodimerization activity; GO:0043621,protein self-association; GO:0010088,phloem development; GO:0005515,protein binding; GO:0003674,molecular_function; GO:0005488,binding; GO:0046983,protein dimerization activity; GO:0042802,identical protein binding; GO:0009888,tissue development; GO:0008150,biological_process; GO:0010087,phloem or xylem histogenesis; GO:0032502,developmenta…	PF14576.6:Sieve element occlusion N-terminus	--	--	--
MS.gene007981	up	down	--	--	XP_003601026.1	--	At5g27760	GO:0031305,integral component of mitochondrial inner membrane; GO:0005746,mitochondrial respiratory chain; GO:0033617,mitochondrial respiratory chain complex IV assembly; GO:0006996,organelle organization; GO:0007005,mitochondrion organization; GO:0008150,biological_process; GO:0008535,respiratory chain complex IV assembly; GO:0009987,cellular process; GO:0022607,cellular component assembly; GO:0…	PF04588.13:Hypoxia induced protein conserved region	--	--	--
MS.gene008206	up	down	--	--	XP_013460649.1	--	At5g17460	GO:0016021,integral component of membrane; GO:0005575,cellular_component; GO:0016020,membrane; GO:0031224,intrinsic component of membrane; GO:0044425,membrane part	--	--	--	--
MS.gene008970	up	down	K22133 oxalate---CoA ligase [EC:6.2.1.8] | (RefSeq) oxalate--CoA ligase (A)	ko00630: Glyoxylate and dicarboxylate metabolism; ko01100: Metabolic pathways	XP_013446070.1	LRK91_ARATH RecName: Full=L-type lectin-domain containing receptor kinase IX.1 {ECO:0000303|PubMed:19773388}; Short=LecRK-IX.1 {ECO:0000303|PubMed:19773388}; EC=2.7.11.1 {ECO:0000255|PROSITE-ProRule:PRU00159}; Flags: Precursor;	At5g10530	GO:0016021,integral component of membrane; GO:0005886,plasma membrane; GO:0005524,ATP binding; GO:0030246,carbohydrate binding; GO:0106310,NA; GO:0106311,NA; GO:0004675,transmembrane receptor protein serine/threonine kinase activity; GO:0042742,defense response to bacterium; GO:0002229,defense response to oomycetes; GO:0010942,positive regulation of cell death; GO:0010726,positive regulation of h…	PF00139.19:Legume lectin domain	--	--	--
MS.gene009237	up	down	K17784 MICOS complex subunit MIC10 | (GenBank) DUF543 domain protein (A)	--	XP_003597993.1	--	At1g22520	GO:0061617,MICOS complex; GO:0005622,intracellular; GO:0005575,cellular_component; GO:0016021,integral component of membrane; GO:0016020,membrane; GO:0005739,mitochondrion; GO:0005623,cell; GO:0005737,cytoplasm; GO:0005740,mitochondrial envelope; GO:0005743,mitochondrial inner membrane; GO:0043231,intracellular membrane-bounded organelle; GO:0019866,organelle inner membrane; GO:0031090,organelle …	PF04418.12:Domain of unknown function (DUF543)	--	--	--
MS.gene011244	up	down	K15718 linoleate 9S-lipoxygenase [EC:1.13.11.58] | (GenBank) seed linoleate 9S-lipoxygenase (A)	ko00591: Linoleic acid metabolism	XP_003627173.1	LOX3_SOYBN RecName: Full=Seed linoleate 9S-lipoxygenase-3; EC=1.13.11.58; AltName: Full=Lipoxygenase-3; Short=L-3;	At1g55020	GO:0005737,cytoplasm; GO:1990136,linoleate 9S-lipoxygenase activity; GO:0046872,metal ion binding; GO:0016702,oxidoreductase activity, acting on single donors with incorporation of molecular oxygen, incorporation of two atoms of oxygen; GO:0006633,fatty acid biosynthetic process; GO:0034440,lipid oxidation; GO:0031408,oxylipin biosynthetic process; GO:0003674,molecular_function; GO:0003824,cataly…	PF00305.19:Lipoxygenase	--	--	--
MS.gene011579	up	down	K20628 expansin | (RefSeq) expansin-B3-like (A)	--	AFK45939.1	EXLB1_ARATH RecName: Full=Expansin-like B1; Short=At-EXPR1; Short=AtEXLB1; Short=AtEXPR1; AltName: Full=Ath-ExpBeta-3.1; Flags: Precursor;	At4g17030	GO:0005576,extracellular region; GO:0019953,sexual reproduction; GO:0000003,reproduction; GO:0008150,biological_process; GO:0022414,reproductive process; GO:0044703,multi-organism reproductive process; GO:0051704,multi-organism process; GO:0005575,cellular_component	PF01357.21:Pollen allergen	--	--	--
MS.gene016051	up	down	K00131 glyceraldehyde-3-phosphate dehydrogenase (NADP+) [EC:1.2.1.9] | (GenBank) NADP-dependent glyceraldehyde-3-phosphate dehydrogenase (A)	ko00010: Glycolysis / Gluconeogenesis; ko00030: Pentose phosphate pathway; ko01100: Metabolic pathways; ko01200: Carbon metabolism	XP_003588885.1	GAPN_PEA RecName: Full=NADP-dependent glyceraldehyde-3-phosphate dehydrogenase; EC=1.2.1.9; AltName: Full=Glyceraldehyde-3-phosphate dehydrogenase [NADP(+)]; AltName: Full=Non-phosphorylating glyceraldehyde 3-phosphate dehydrogenase; AltName: Full=Triosephosphate dehydrogenase;	At2g24270	GO:0005737,cytoplasm; GO:0008886,glyceraldehyde-3-phosphate dehydrogenase (NADP+) (non-phosphorylating) activity; GO:0003674,molecular_function; GO:0003824,catalytic activity; GO:0016491,oxidoreductase activity; GO:0016620,oxidoreductase activity, acting on the aldehyde or oxo group of donors, NAD or NADP as acceptor; GO:0016903,oxidoreductase activity, acting on the aldehyde or oxo group of dono…	PF00171.22:Aldehyde dehydrogenase family	--	--	--
MS.gene017563	up	down	K20547 basic endochitinase B [EC:3.2.1.14] | (GenBank) Chitinase (Class Ib) / Hevein (A)	ko00520: Amino sugar and nucleotide sugar metabolism; ko01100: Metabolic pathways; ko04016: MAPK signaling pathway - plant	XP_003629192.1	CHIX_PEA RecName: Full=Endochitinase; EC=3.2.1.14; Flags: Precursor;	At3g12500	GO:0008061,chitin binding; GO:0004568,chitinase activity; GO:0016998,cell wall macromolecule catabolic process; GO:0006032,chitin catabolic process; GO:0006952,defense response; GO:0000272,polysaccharide catabolic process; GO:0003674,molecular_function; GO:0005488,binding; GO:0008144,drug binding; GO:0097367,carbohydrate derivative binding; GO:0003824,catalytic activity; GO:0004553,hydrolase acti…	PF00182.19:Chitinase class I	--	--	--
MS.gene024794	up	down	K22767 histone acetyltransferase MCC1 [EC:2.3.1.48] | (GenBank) GCN5-related N-acetyltransferase (GNAT) family protein (A)	--	XP_003610822.1	MCC1_ARATH RecName: Full=Histone acetyltransferase MCC1; EC=2.3.1.48; AltName: Full=Protein MEIOTIC CONTROL OF CROSSOVERS 1;	At5g16800	GO:0000139,Golgi membrane; GO:0004402,histone acetyltransferase activity; GO:0004596,peptide alpha-N-acetyltransferase activity; GO:0007059,chromosome segregation; GO:0043966,histone H3 acetylation; GO:0043967,histone H4 acetylation; GO:0051321,meiotic cell cycle; GO:0017196,N-terminal peptidyl-methionine acetylation; GO:0003674,molecular_function; GO:0003824,catalytic activity; GO:0008080,N-acet…	PF00583.25:Acetyltransferase (GNAT) family	GNAT	TR	GNAT
MS.gene025675	up	down	K11294 nucleolin | (RefSeq) nucleolin-like (A)	--	PNX72859.1	--	At2g15520	GO:0016021,integral component of membrane; GO:0003676,nucleic acid binding; GO:0008270,zinc ion binding; GO:0003674,molecular_function; GO:0005488,binding; GO:0097159,organic cyclic compound binding; GO:1901363,heterocyclic compound binding; GO:0046872,metal ion binding; GO:0043167,ion binding; GO:0043169,cation binding; GO:0046914,transition metal ion binding; GO:0005575,cellular_component; GO:0…	PF14111.6:Domain of unknown function (DUF4283)	--	--	--
MS.gene026520	up	down	--	--	--	--	--	--	--	--	--	--
MS.gene02757	up	down	K19706 dihydroceramide fatty acyl 2-hydroxylase [EC:1.14.18.7] | (GenBank) fatty acid 2-hydroxylase-like protein (A)	--	XP_003594600.1	FAH1_ARATH RecName: Full=Dihydroceramide fatty acyl 2-hydroxylase FAH1 {ECO:0000305}; EC=1.14.18.7 {ECO:0000269|PubMed:22635113}; AltName: Full=Fatty acid 2-hydroxylase 1 {ECO:0000303|PubMed:19054355}; Short=AtFAH1 {ECO:0000303|PubMed:19054355};	At2g34770	GO:0005783,endoplasmic reticulum; GO:0005789,endoplasmic reticulum membrane; GO:0016021,integral component of membrane; GO:0080132,fatty acid alpha-hydroxylase activity; GO:0005506,iron ion binding; GO:0102771,sphingolipid very long chain fatty acid alpha-hydroxylase activity; GO:0006633,fatty acid biosynthetic process; GO:0006631,fatty acid metabolic process; GO:0000038,very long-chain fatty aci…	--	--	--	--
MS.gene03108	up	down	--	--	XP_013450170.1	--	--	--	--	--	--	--
MS.gene031372	up	down	K03231 elongation factor 1-alpha | (GenBank) elongation factor 1-alpha-like protein (A)	ko03013: RNA transport	XP_013464767.1	EF1A_VICFA RecName: Full=Elongation factor 1-alpha; Short=EF-1-alpha;	At1g07920	GO:0005737,cytoplasm; GO:0005525,GTP binding; GO:0003924,GTPase activity; GO:0003746,translation elongation factor activity; GO:0000166,nucleotide binding; GO:0001882,nucleoside binding; GO:0001883,purine nucleoside binding; GO:0003674,molecular_function; GO:0005488,binding; GO:0017076,purine nucleotide binding; GO:0019001,guanyl nucleotide binding; GO:0032549,ribonucleoside binding; GO:0032550,p…	PF00009.27:Elongation factor Tu GTP binding domain	--	--	--
MS.gene034876	up	down	K12856 pre-mRNA-processing factor 8 | (RefSeq) pre-mRNA-processing-splicing factor 8-like (A)	ko03040: Spliceosome	XP_004486659.1	PRP8A_ARATH RecName: Full=Pre-mRNA-processing-splicing factor 8A {ECO:0000305}; AltName: Full=PRP8 homolog A {ECO:0000305}; Short=AtPRP8A {ECO:0000303|PubMed:19261069}; AltName: Full=Protein ABNORMAL SUSPENSOR 2 {ECO:0000303|Ref.3}; AltName: Full=Protein EMBRYO DEFECTIVE 14 {ECO:0000303|Ref.3}; AltName: Full=Protein EMBRYO DEFECTIVE 177 {ECO:0000303|Ref.3}; AltName: Full=Protein EMBRYO DEFECTIVE …	At1g80070	GO:0071013,catalytic step 2 spliceosome; GO:0005739,mitochondrion; GO:0005682,U5 snRNP; GO:0070122,isopeptidase activity; GO:0008237,metallopeptidase activity; GO:0097157,pre-mRNA intronic binding; GO:0030619,U1 snRNA binding; GO:0030620,U2 snRNA binding; GO:0030623,U5 snRNA binding; GO:0017070,U6 snRNA binding; GO:0000380,alternative mRNA splicing, via spliceosome; GO:0000398,mRNA splicing, via …	PF08083.11:PROCN (NUC071) domain	--	--	--
MS.gene047665	up	down	K00430 peroxidase [EC:1.11.1.7] | (GenBank) class III peroxidase (A)	ko00940: Phenylpropanoid biosynthesis; ko01100: Metabolic pathways; ko01110: Biosynthesis of secondary metabolites	XP_003611788.1	PER10_ARATH RecName: Full=Peroxidase 10; Short=Atperox P10; EC=1.11.1.7; AltName: Full=ATP5a; Flags: Precursor;	At1g49570	GO:0005576,extracellular region; GO:0020037,heme binding; GO:0046872,metal ion binding; GO:0004601,peroxidase activity; GO:0042744,hydrogen peroxide catabolic process; GO:0006979,response to oxidative stress; GO:0003674,molecular_function; GO:0005488,binding; GO:0046906,tetrapyrrole binding; GO:0048037,cofactor binding; GO:0097159,organic cyclic compound binding; GO:1901363,heterocyclic compound …	PF00141.23:Peroxidase	--	--	--
MS.gene051061	up	down	K07441 beta-1,4-N-acetylglucosaminyltransferase [EC:2.4.1.141] | (RefSeq) UDP-N-acetylglucosamine transferase subunit ALG14 homolog (A)	ko00510: N-Glycan biosynthesis; ko00513: Various types of N-glycan biosynthesis; ko01100: Metabolic pathways	XP_003627387.1	SAU77_ARATH RecName: Full=Auxin-responsive protein SAUR77 {ECO:0000305}; AltName: Full=Protein SMALL AUXIN UP RNA 77 {ECO:0000303|PubMed:26207341};	At1g72430	GO:0005737,cytoplasm; GO:0019897,extrinsic component of plasma membrane; GO:0005634,nucleus; GO:0009873,ethylene-activated signaling pathway; GO:0007275,multicellular organism development; GO:0030307,positive regulation of cell growth; GO:0009733,response to auxin; GO:0000160,phosphorelay signal transduction system; GO:0007165,signal transduction; GO:0035556,intracellular signal transduction; GO:…	PF02519.14:Auxin responsive protein	--	--	--
MS.gene054073	up	down	K03283 heat shock 70kDa protein 1/2/6/8 | (RefSeq) heat shock cognate 70 kDa protein 2-like (A)	ko03040: Spliceosome; ko04141: Protein processing in endoplasmic reticulum; ko04144: Endocytosis	XP_013466322.1	LRK10_WHEAT RecName: Full=Rust resistance kinase Lr10 {ECO:0000312|EMBL:AAC49629.1}; EC=2.7.11.1; AltName: Full=Probable receptor-like serine/threonine-protein kinase LRK10; Flags: Precursor;	At5g38280	GO:0016021,integral component of membrane; GO:0005886,plasma membrane; GO:0005524,ATP binding; GO:0106310,NA; GO:0106311,NA; GO:0000166,nucleotide binding; GO:0003674,molecular_function; GO:0005488,binding; GO:0008144,drug binding; GO:0017076,purine nucleotide binding; GO:0030554,adenyl nucleotide binding; GO:0032553,ribonucleotide binding; GO:0032555,purine ribonucleotide binding; GO:0032559,ade…	PF00069.25:Protein kinase domain	--	--	--
MS.gene066033	up	down	K07300 Ca2+:H+ antiporter | (RefSeq) cax1; Ca2+/H+ antiporter, cation antiporter, membrane protein (A)	--	XP_003590834.1	GLTP1_ARATH RecName: Full=Glycolipid transfer protein 1 {ECO:0000303|PubMed:16309699};	At2g33470	GO:0005829,cytosol; GO:0016020,membrane; GO:0005886,plasma membrane; GO:1902387,ceramide 1-phosphate binding; GO:1902388,ceramide 1-phosphate transporter activity; GO:0035627,ceramide transport; GO:0120009,intermembrane lipid transfer; GO:0003674,molecular_function; GO:0005488,binding; GO:0005543,phospholipid binding; GO:0008289,lipid binding; GO:0033218,amide binding; GO:0043167,ion binding; GO:…	PF08718.11:Glycolipid transfer protein (GLTP)	--	--	--
MS.gene067278	up	down	--	--	XP_013444602.1	--	At1g01240	GO:0016021,integral component of membrane; GO:0005575,cellular_component; GO:0016020,membrane; GO:0031224,intrinsic component of membrane; GO:0044425,membrane part	--	--	--	--
MS.gene068867	up	down	K11098 small nuclear ribonucleoprotein F | (GenBank) small nuclear ribonucleoprotein (A)	ko03040: Spliceosome	XP_003610112.1	RUXF_ARATH RecName: Full=Probable small nuclear ribonucleoprotein F; Short=snRNP-F; AltName: Full=Sm protein F; Short=Sm-F; Short=SmF;	At4g30220	GO:0071013,catalytic step 2 spliceosome; GO:0005685,U1 snRNP; GO:0003723,RNA binding; GO:0000398,mRNA splicing, via spliceosome; GO:0000387,spliceosomal snRNP assembly; GO:0003674,molecular_function; GO:0003676,nucleic acid binding; GO:0005488,binding; GO:0097159,organic cyclic compound binding; GO:1901363,heterocyclic compound binding; GO:0000375,RNA splicing, via transesterification reactions; …	PF01423.22:LSM domain	--	--	--
MS.gene069906	up	down	K03363 cell division cycle 20, cofactor of APC complex | (GenBank) anaphase-promoting complex subunit cdc20-like protein (A)	ko04120: Ubiquitin mediated proteolysis	XP_003597637.1	--	--	--	--	--	--	--
MS.gene20153	up	down	K02910 large subunit ribosomal protein L31e | (GenBank) 60S ribosomal protein L31B (A)	ko03010: Ribosome	XP_003630662.2	RL31_NICGU RecName: Full=60S ribosomal protein L31;	At5g56710	GO:0005840,ribosome; GO:0003735,structural constituent of ribosome; GO:0006412,translation; GO:0003674,molecular_function; GO:0005198,structural molecule activity; GO:0008152,metabolic process; GO:0006518,peptide metabolic process; GO:0006807,nitrogen compound metabolic process; GO:0008150,biological_process; GO:0009058,biosynthetic process; GO:0009059,macromolecule biosynthetic process; GO:00099…	PF01198.19:Ribosomal protein L31e	--	--	--
MS.gene20199	up	down	K11153 retinol dehydrogenase 12 [EC:1.1.1.300] | (RefSeq) short-chain dehydrogenase TIC 32, chloroplastic (A)	ko01100: Metabolic pathways; ko01240: Biosynthesis of cofactors	XP_013447262.1	TC32A_BRANA RecName: Full=Short-chain dehydrogenase TIC 32 A, chloroplastic {ECO:0000305}; EC=1.1.1.- {ECO:0000305}; AltName: Full=Pod-specific dehydrogenase SAC25 {ECO:0000303|PubMed:8111020}; AltName: Full=Translocon at the inner envelope membrane of chloroplasts 32 A {ECO:0000305}; Short=BnTIC32A {ECO:0000305};	At4g24050	GO:0009706,chloroplast inner membrane; GO:0005516,calmodulin binding; GO:0016491,oxidoreductase activity; GO:0015031,protein transport; GO:0005515,protein binding; GO:0003674,molecular_function; GO:0005488,binding; GO:0003824,catalytic activity; GO:0008104,protein localization; GO:0006810,transport; GO:0008150,biological_process; GO:0015833,peptide transport; GO:0033036,macromolecule localization…	PF00106.25:short chain dehydrogenase	--	--	--
MS.gene25173	up	down	--	--	--	--	--	--	--	--	--	--
MS.gene25906	up	down	K11593 eukaryotic translation initiation factor 2C | (GenBank) eukaryotic translation initiation factor 2c, putative (A)	--	XP_013461066.1	AGO4_ARATH RecName: Full=Protein argonaute 4 {ECO:0000303|PubMed:12522258, ECO:0000303|PubMed:28229965}; Short=AtAGO4 {ECO:0000303|PubMed:12522258, ECO:0000303|PubMed:28229965}; AltName: Full=Protein OVEREXPRESSOR OF CATIONIC PEROXIDASE 11;	At2g27040	GO:0015030,Cajal body; GO:0000791,euchromatin; GO:0005730,nucleolus; GO:0005654,nucleoplasm; GO:0003682,chromatin binding; GO:0004521,endoribonuclease activity; GO:0035198,miRNA binding; GO:0035197,siRNA binding; GO:0006342,chromatin silencing; GO:0042742,defense response to bacterium; GO:0051607,defense response to virus; GO:0006306,DNA methylation; GO:0016458,gene silencing; GO:0080188,RNA-dire…	PF02171.17:Piwi domain	--	--	--
MS.gene28358	up	down	K01188 beta-glucosidase [EC:3.2.1.21] | (GenBank) glycoside hydrolase family 1 protein (A)	ko00460: Cyanoamino acid metabolism; ko00500: Starch and sucrose metabolism; ko00940: Phenylpropanoid biosynthesis; ko01100: Metabolic pathways; ko01110: Biosynthesis of secondary metabolites	ABW76287.1	BGL12_ORYSI RecName: Full=Beta-glucosidase 12 {ECO:0000305}; EC=3.2.1.21 {ECO:0000305}; Flags: Precursor;	At2g44480	GO:0005576,extracellular region; GO:0008422,beta-glucosidase activity; GO:0102483,scopolin beta-glucosidase activity; GO:0005975,carbohydrate metabolic process; GO:0003674,molecular_function; GO:0003824,catalytic activity; GO:0004553,hydrolase activity, hydrolyzing O-glycosyl compounds; GO:0015926,glucosidase activity; GO:0016787,hydrolase activity; GO:0016798,hydrolase activity, acting on glycos…	PF00232.18:Glycosyl hydrolase family 1	--	--	--
MS.gene28392	up	down	--	--	XP_003630263.1	--	--	--	--	--	--	--
MS.gene32828	up	down	K01369 legumain [EC:3.4.22.34] | (GenBank) vacuolar processing enzyme (A)	--	XP_003603121.1	VPEG_ARATH RecName: Full=Vacuolar-processing enzyme gamma-isozyme; EC=3.4.22.34 {ECO:0000250|UniProtKB:Q84LM2}; AltName: Full=Asparaginyl endopeptidase gamma-VPE {ECO:0000305}; AltName: Full=Gamma-VPE; Flags: Precursor;	At4g32940	GO:0000323,lytic vacuole; GO:0000326,protein storage vacuole; GO:0004197,cysteine-type endopeptidase activity; GO:0004175,endopeptidase activity; GO:0010150,leaf senescence; GO:0051603,proteolysis involved in cellular protein catabolic process; GO:0009723,response to ethylene; GO:0009753,response to jasmonic acid; GO:0009751,response to salicylic acid; GO:0009611,response to wounding; GO:0006624,…	PF01650.18:Peptidase C13 family	--	--	--
MS.gene33139	up	down	K00131 glyceraldehyde-3-phosphate dehydrogenase (NADP+) [EC:1.2.1.9] | (GenBank) NADP-dependent glyceraldehyde-3-phosphate dehydrogenase (A)	ko00010: Glycolysis / Gluconeogenesis; ko00030: Pentose phosphate pathway; ko01100: Metabolic pathways; ko01200: Carbon metabolism	XP_003588885.1	GAPN_PEA RecName: Full=NADP-dependent glyceraldehyde-3-phosphate dehydrogenase; EC=1.2.1.9; AltName: Full=Glyceraldehyde-3-phosphate dehydrogenase [NADP(+)]; AltName: Full=Non-phosphorylating glyceraldehyde 3-phosphate dehydrogenase; AltName: Full=Triosephosphate dehydrogenase;	At2g24270	GO:0005737,cytoplasm; GO:0008886,glyceraldehyde-3-phosphate dehydrogenase (NADP+) (non-phosphorylating) activity; GO:0003674,molecular_function; GO:0003824,catalytic activity; GO:0016491,oxidoreductase activity; GO:0016620,oxidoreductase activity, acting on the aldehyde or oxo group of donors, NAD or NADP as acceptor; GO:0016903,oxidoreductase activity, acting on the aldehyde or oxo group of dono…	PF00171.22:Aldehyde dehydrogenase family	--	--	--
MS.gene35606	up	down	K09527 DnaJ homolog subfamily C member 7 | (GenBank) TPR repeat thioredoxin TTL1-like protein (A)	--	XP_013460872.1	TTL1_ARATH RecName: Full=TPR repeat-containing thioredoxin TTL1; AltName: Full=Tetratricopeptide repeat thioredoxin-like 1;	At1g78120	GO:0005737,cytoplasm; GO:0009738,abscisic acid-activated signaling pathway; GO:0009789,positive regulation of abscisic acid-activated signaling pathway; GO:0009737,response to abscisic acid; GO:0006970,response to osmotic stress; GO:0009651,response to salt stress; GO:0001101,response to acid chemical; GO:0007165,signal transduction; GO:0007154,cell communication; GO:0008150,biological_process; G…	PF00515.28:Tetratricopeptide repeat	--	--	--
MS.gene36254	up	down	--	--	XP_003596701.1	--	--	GO:0004869,cysteine-type endopeptidase inhibitor activity; GO:0003674,molecular_function; GO:0004857,enzyme inhibitor activity; GO:0004866,endopeptidase inhibitor activity; GO:0061135,endopeptidase regulator activity; GO:0098772,molecular function regulator; GO:0030414,peptidase inhibitor activity; GO:0030234,enzyme regulator activity; GO:0061134,peptidase regulator activity	PF16845.5:Aspartic acid proteinase inhibitor	--	--	--
MS.gene38396	up	down	K18875 enhanced disease susceptibility 1 protein | (RefSeq) protein EDS1-like (A)	ko04626: Plant-pathogen interaction	XP_004500367.1	SG101_ARATH RecName: Full=Senescence-associated carboxylesterase 101; EC=3.1.1.1; Flags: Precursor;	At5g14930	GO:0005737,cytoplasm; GO:0016021,integral component of membrane; GO:0005634,nucleus; GO:0052689,carboxylic ester hydrolase activity; GO:0080030,methyl indole-3-acetate esterase activity; GO:0007568,aging; GO:0050829,defense response to Gram-negative bacterium; GO:0060866,leaf abscission; GO:0016042,lipid catabolic process; GO:1900426,positive regulation of defense response to bacterium; GO:190229…	PF18117.1:Enhanced disease susceptibility 1 protein EP domain	--	--	--
MS.gene41103	up	down	K10704 ubiquitin-conjugating enzyme E2 variant | (RefSeq) ubiquitin-conjugating enzyme E2 variant 1C (A)	--	XP_013467919.1	UEV1D_ARATH RecName: Full=Ubiquitin-conjugating enzyme E2 variant 1D; Short=Ubc enzyme variant 1D; AltName: Full=Protein MMS ZWEI HOMOLOG 4;	At3g52560	GO:0005634,nucleus; GO:0006301,postreplication repair; GO:0070534,protein K63-linked ubiquitination; GO:0000209,protein polyubiquitination; GO:0008152,metabolic process; GO:0006139,nucleobase-containing compound metabolic process; GO:0006259,DNA metabolic process; GO:0006281,DNA repair; GO:0006725,cellular aromatic compound metabolic process; GO:0006807,nitrogen compound metabolic process; GO:000…	PF00179.26:Ubiquitin-conjugating enzyme	--	--	--
MS.gene42233	up	down	--	--	ABN08827.1	FB345_ARATH RecName: Full=F-box protein At4g00755;	--	--	PF12937.7:F-box-like	--	--	--
MS.gene48390	up	down	K10260 F-box and WD-40 domain protein 7 | (RefSeq) WD40 repeat protein (A)	ko04120: Ubiquitin mediated proteolysis	XP_003608976.1	PUB19_ARATH RecName: Full=U-box domain-containing protein 19; EC=2.3.2.27; AltName: Full=Plant U-box protein 19; AltName: Full=RING-type E3 ubiquitin transferase PUB19 {ECO:0000305};	At1g60190	GO:0005737,cytoplasm; GO:0005634,nucleus; GO:0004842,ubiquitin-protein transferase activity; GO:0010029,regulation of seed germination; GO:0003674,molecular_function; GO:0003824,catalytic activity; GO:0016740,transferase activity; GO:0019787,ubiquitin-like protein transferase activity; GO:0140096,catalytic activity, acting on a protein; GO:0007275,multicellular organism development; GO:0008150,bi…	PF04564.15:U-box domain	--	--	--
MS.gene52413	up	down	K05931 type I protein arginine methyltransferase [EC:2.1.1.319] | (GenBank) histone-arginine methyltransferase, putative (A)	--	XP_013463251.1	ANM14_ARATH RecName: Full=Probable histone-arginine methyltransferase 1.4; Short=AtPRMT14; EC=2.1.1.319; AltName: Full=Coactivator-associated methyltransferase 1B; AltName: Full=Protein arginine N-methyltransferase 4A; Short=AtPRMT4A;	At5g49020	GO:0009507,chloroplast; GO:0005737,cytoplasm; GO:0005634,nucleus; GO:0016277,[myelin basic protein]-arginine N-methyltransferase activity; GO:0008469,histone-arginine N-methyltransferase activity; GO:0046982,protein heterodimerization activity; GO:0042803,protein homodimerization activity; GO:0035242,protein-arginine omega-N asymmetric methyltransferase activity; GO:0035241,protein-arginine omega…	PF13649.6:Methyltransferase domain	--	--	--
MS.gene54823	up	down	K04424 sterile alpha motif and leucine zipper containing kinase AZK [EC:2.7.11.25] | (RefSeq) probable serine/threonine-protein kinase SIS8 isoform X1 (A)	--	XP_003597130.2	EDR1_ARATH RecName: Full=Serine/threonine-protein kinase EDR1; EC=2.7.11.1; AltName: Full=MAPKK kinase EDR1; AltName: Full=Protein ENHANCED DISEASE RESISTANCE 1; Short=AtEDR1; AltName: Full=Serine/threonine/tyrosine-protein kinase 10;	At3g58640	GO:0005737,cytoplasm; GO:0005829,cytosol; GO:0005769,early endosome; GO:0005783,endoplasmic reticulum; GO:0005768,endosome; GO:0005634,nucleus; GO:0005886,plasma membrane; GO:0005802,trans-Golgi network; GO:0012510,trans-Golgi network transport vesicle membrane; GO:0005524,ATP binding; GO:0016301,kinase activity; GO:0004709,MAP kinase kinase kinase activity; GO:0004672,protein kinase activity; GO…	PF07714.17:Protein tyrosine kinase	--	--	--
MS.gene56926	up	down	K10260 F-box and WD-40 domain protein 7 | (RefSeq) WD40 repeat protein (A)	ko04120: Ubiquitin mediated proteolysis	XP_003608976.1	PUB19_ARATH RecName: Full=U-box domain-containing protein 19; EC=2.3.2.27; AltName: Full=Plant U-box protein 19; AltName: Full=RING-type E3 ubiquitin transferase PUB19 {ECO:0000305};	At1g60190	GO:0005737,cytoplasm; GO:0005634,nucleus; GO:0004842,ubiquitin-protein transferase activity; GO:0010029,regulation of seed germination; GO:0003674,molecular_function; GO:0003824,catalytic activity; GO:0016740,transferase activity; GO:0019787,ubiquitin-like protein transferase activity; GO:0140096,catalytic activity, acting on a protein; GO:0007275,multicellular organism development; GO:0008150,bi…	PF04564.15:U-box domain	--	--	--
MS.gene60301	up	down	K06990 MEMO1 family protein | (GenBank) AmmeMemoRadiSam system protein B (A)	--	XP_013465804.1	--	At2g25280	--	PF01875.17:Memo-like protein	--	--	--
MS.gene60356	up	down	K10260 F-box and WD-40 domain protein 7 | (RefSeq) WD40 repeat protein (A)	ko04120: Ubiquitin mediated proteolysis	XP_003608976.1	PUB19_ARATH RecName: Full=U-box domain-containing protein 19; EC=2.3.2.27; AltName: Full=Plant U-box protein 19; AltName: Full=RING-type E3 ubiquitin transferase PUB19 {ECO:0000305};	At1g60190	GO:0005737,cytoplasm; GO:0005634,nucleus; GO:0004842,ubiquitin-protein transferase activity; GO:0010029,regulation of seed germination; GO:0003674,molecular_function; GO:0003824,catalytic activity; GO:0016740,transferase activity; GO:0019787,ubiquitin-like protein transferase activity; GO:0140096,catalytic activity, acting on a protein; GO:0007275,multicellular organism development; GO:0008150,bi…	PF04564.15:U-box domain	--	--	--
MS.gene62286	up	down	K00703 starch synthase [EC:2.4.1.21] | (RefSeq) Starch synthase (A)	ko00500: Starch and sucrose metabolism; ko01100: Metabolic pathways; ko01110: Biosynthesis of secondary metabolites	XP_013460584.1	PTST_ARATH RecName: Full=Protein PTST, chloroplastic {ECO:0000303|PubMed:25710501}; AltName: Full=PROTEIN TARGETING TO STARCH {ECO:0000303|PubMed:25710501}; Flags: Precursor;	At5g39790	GO:0009507,chloroplast; GO:0009569,chloroplast starch grain; GO:0009570,chloroplast stroma; GO:0030247,polysaccharide binding; GO:2001070,starch binding; GO:0010581,regulation of starch biosynthetic process; GO:0019252,starch biosynthetic process; GO:0001871,pattern binding; GO:0003674,molecular_function; GO:0030246,carbohydrate binding; GO:0005488,binding; GO:0000271,polysaccharide biosynthetic …	PF16561.5:Glycogen recognition site of AMP-activated protein kinase	--	--	--
MS.gene62886	up	down	K11855 ubiquitin carboxyl-terminal hydrolase 36/42 [EC:3.4.19.12] | (RefSeq) ubiquitin carboxyl-terminal hydrolase 36 (A)	--	XP_003608741.1	14KD_DAUCA RecName: Full=14 kDa proline-rich protein DC2.15; Flags: Precursor;	At2g45180	GO:0016021,integral component of membrane; GO:0005575,cellular_component; GO:0016020,membrane; GO:0031224,intrinsic component of membrane; GO:0044425,membrane part	PF14547.6:Hydrophobic seed protein	--	--	--
MS.gene62950	up	down	K01180 endo-1,3(4)-beta-glucanase [EC:3.2.1.6] | (RefSeq) uncharacterized protein LOC111487562 (A)	--	XP_013460640.1	PEK11_ARATH RecName: Full=Putative proline-rich receptor-like protein kinase PERK11; EC=2.7.11.1; AltName: Full=Proline-rich extensin-like receptor kinase 11; Short=AtPERK11;	At5g37790	GO:0016021,integral component of membrane; GO:0005886,plasma membrane; GO:0005524,ATP binding; GO:0106310,NA; GO:0106311,NA; GO:0000166,nucleotide binding; GO:0003674,molecular_function; GO:0005488,binding; GO:0008144,drug binding; GO:0017076,purine nucleotide binding; GO:0030554,adenyl nucleotide binding; GO:0032553,ribonucleotide binding; GO:0032555,purine ribonucleotide binding; GO:0032559,ade…	PF00069.25:Protein kinase domain	--	--	--
MS.gene68181	up	down	K14975 codeine 3-O-demethylase [EC:1.14.11.32] | (RefSeq) codeine O-demethylase (A)	ko00950: Isoquinoline alkaloid biosynthesis; ko01100: Metabolic pathways; ko01110: Biosynthesis of secondary metabolites	XP_003604000.1	ODD11_ORYSJ RecName: Full=2-oxoglutarate-dependent dioxygenase 11 {ECO:0000303|PubMed:25728912}; EC=1.14.11.- {ECO:0000255|PROSITE-ProRule:PRU00805, ECO:0000269|PubMed:25728912}; AltName: Full=Melatonin 2-hydroxylase {ECO:0000303|PubMed:25728912};	At5g20400	GO:0005737,cytoplasm; GO:0051213,dioxygenase activity; GO:0031418,L-ascorbic acid binding; GO:0046872,metal ion binding; GO:0003674,molecular_function; GO:0003824,catalytic activity; GO:0016491,oxidoreductase activity; GO:0030246,carbohydrate binding; GO:0005488,binding; GO:0019842,vitamin binding; GO:0031406,carboxylic acid binding; GO:0036094,small molecule binding; GO:0043167,ion binding; GO:0…	PF03171.20:2OG-Fe(II) oxygenase superfamily	--	--	--
MS.gene72002	up	down	K20628 expansin | (RefSeq) EXPB9; expansin-B3-like precursor (A)	--	AFK45939.1	EXLB1_ARATH RecName: Full=Expansin-like B1; Short=At-EXPR1; Short=AtEXLB1; Short=AtEXPR1; AltName: Full=Ath-ExpBeta-3.1; Flags: Precursor;	At4g17030	GO:0005576,extracellular region; GO:0019953,sexual reproduction; GO:0000003,reproduction; GO:0008150,biological_process; GO:0022414,reproductive process; GO:0044703,multi-organism reproductive process; GO:0051704,multi-organism process; GO:0005575,cellular_component	PF01357.21:Pollen allergen	--	--	--
MS.gene73382	up	down	K00411 ubiquinol-cytochrome c reductase iron-sulfur subunit [EC:7.1.1.8] | (GenBank) cytochrome B-c1 complex subunit Rieske protein (A)	ko00190: Oxidative phosphorylation; ko01100: Metabolic pathways	XP_003624512.1	UCRI2_TOBAC RecName: Full=Cytochrome b-c1 complex subunit Rieske-2, mitochondrial; EC=7.1.1.8; AltName: Full=Complex III subunit 5-2; AltName: Full=Rieske iron-sulfur protein 2; Short=RISP2; AltName: Full=Ubiquinol-cytochrome c reductase iron-sulfur subunit 2; Flags: Precursor;	At5g13440	GO:0016021,integral component of membrane; GO:0005750,mitochondrial respiratory chain complex III; GO:0051537,2 iron, 2 sulfur cluster binding; GO:0046872,metal ion binding; GO:0016491,oxidoreductase activity; GO:0008121,ubiquinol-cytochrome-c reductase activity; GO:0006122,mitochondrial electron transport, ubiquinol to cytochrome c; GO:0003674,molecular_function; GO:0005488,binding; GO:0048037,c…	PF00355.26:Rieske [2Fe-2S] domain	--	--	--
MS.gene89070	up	down	--	--	XP_003596701.1	--	--	GO:0004869,cysteine-type endopeptidase inhibitor activity; GO:0003674,molecular_function; GO:0004857,enzyme inhibitor activity; GO:0004866,endopeptidase inhibitor activity; GO:0061135,endopeptidase regulator activity; GO:0098772,molecular function regulator; GO:0030414,peptidase inhibitor activity; GO:0030234,enzyme regulator activity; GO:0061134,peptidase regulator activity	PF16845.5:Aspartic acid proteinase inhibitor	--	--	--
MS.gene91489	up	down	K12836 splicing factor U2AF 35 kDa subunit | (GenBank) splicing factor U2af small subunit A-like protein (A)	ko03040: Spliceosome	XP_013464901.1	U2AFA_ORYSJ RecName: Full=Splicing factor U2af small subunit A; AltName: Full=U2 auxiliary factor 35 kDa subunit A; AltName: Full=U2 small nuclear ribonucleoprotein auxiliary factor small subunit A; Short=U2 snRNP auxiliary factor small subunit A; AltName: Full=Zinc finger CCCH domain-containing protein 60; Short=OsC3H60;	At5g42820	GO:0005681,spliceosomal complex; GO:0089701,U2AF; GO:0003677,DNA binding; GO:0046872,metal ion binding; GO:0030628,pre-mRNA 3'-splice site binding; GO:0000398,mRNA splicing, via spliceosome; GO:0003674,molecular_function; GO:0003676,nucleic acid binding; GO:0005488,binding; GO:0097159,organic cyclic compound binding; GO:1901363,heterocyclic compound binding; GO:0043167,ion binding; GO:0043169,cat…	PF00642.24:Zinc finger C-x8-C-x5-C-x3-H type (and similar)	--	--	--
MS.gene98524	up	down	--	--	XP_003616815.1	--	--	--	PF07172.11:Glycine rich protein family	--	--	--
novel.10968	up	down	--	--	XP_003611989.2	--	--	--	--	--	--	--
novel.16981	up	down	--	--	--	--	--	--	--	--	--	--
novel.17046	up	down	--	--	XP_013443359.1	--	--	--	--	--	--	--
novel.19467	up	down	--	--	--	--	--	--	--	--	--	--
novel.2604	up	down	--	--	XP_013460511.1	--	--	GO:0016021,integral component of membrane; GO:0005575,cellular_component; GO:0016020,membrane; GO:0031224,intrinsic component of membrane; GO:0044425,membrane part	--	--	--	--
novel.3628	up	down	--	--	XP_003604868.1	--	--	GO:0016620,oxidoreductase activity, acting on the aldehyde or oxo group of donors, NAD or NADP as acceptor; GO:0003674,molecular_function; GO:0003824,catalytic activity; GO:0016491,oxidoreductase activity; GO:0016903,oxidoreductase activity, acting on the aldehyde or oxo group of donors	--	--	--	--
novel.3686	up	down	--	--	--	--	--	--	--	--	--	--
novel.5405	up	down	--	--	XP_013464786.1	--	At4g10270	--	PF12609.8:Wound-induced protein	--	--	--
novel.6048	up	down	--	--	--	--	--	--	--	--	--	--
novel.6049	up	down	--	--	--	--	--	--	--	--	--	--
novel.6418	up	down	--	--	XP_003598610.1	--	--	GO:0016021,integral component of membrane; GO:0005575,cellular_component; GO:0016020,membrane; GO:0031224,intrinsic component of membrane; GO:0044425,membrane part	--	--	--	--
novel.6603	up	down	--	--	--	--	--	--	--	--	--	--
novel.6995	up	down	--	--	XP_003598610.1	--	--	GO:0016021,integral component of membrane; GO:0005575,cellular_component; GO:0016020,membrane; GO:0031224,intrinsic component of membrane; GO:0044425,membrane part	--	--	--	--
novel.7175	up	down	--	--	--	--	--	--	--	--	--	--
novel.7558	up	down	--	--	XP_003596658.1	--	--	GO:0008233,peptidase activity; GO:0003674,molecular_function; GO:0003824,catalytic activity; GO:0016787,hydrolase activity; GO:0140096,catalytic activity, acting on a protein	--	--	--	--
novel.7728	up	down	--	--	--	--	--	--	--	--	--	--
novel.9133	up	down	K01303 acylaminoacyl-peptidase [EC:3.4.19.1] | (RefSeq) uncharacterized LOC101311565 (A)	--	XP_014621692.1	M750_ARATH RecName: Full=Uncharacterized mitochondrial protein AtMg00750; AltName: Full=ORF119;	At1g42375	GO:0005739,mitochondrion; GO:0005622,intracellular; GO:0005575,cellular_component; GO:0005623,cell; GO:0005737,cytoplasm; GO:0043231,intracellular membrane-bounded organelle; GO:0043226,organelle; GO:0043227,membrane-bounded organelle; GO:0043229,intracellular organelle; GO:0044424,intracellular part; GO:0044444,cytoplasmic part; GO:0044464,cell part	PF17917.1:RNase H-like domain found in reverse transcriptase	--	--	--
novel.9134	up	down	--	--	--	--	--	--	--	--	--	--
novel.9607	up	down	--	--	XP_013468068.1	--	--	GO:0016021,integral component of membrane; GO:0005575,cellular_component; GO:0016020,membrane; GO:0031224,intrinsic component of membrane; GO:0044425,membrane part	--	--	--	--
MS.gene013412	down	up	K04564 superoxide dismutase, Fe-Mn family [EC:1.15.1.1] | (GenBank) superoxide dismutase (A)	ko04146: Peroxisome	XP_013461533.1	SODM_PEA RecName: Full=Superoxide dismutase [Mn], mitochondrial; EC=1.15.1.1; Flags: Precursor;	At3g10920	GO:0005759,mitochondrial matrix; GO:0046872,metal ion binding; GO:0004784,superoxide dismutase activity; GO:0003674,molecular_function; GO:0005488,binding; GO:0043167,ion binding; GO:0043169,cation binding; GO:0003824,catalytic activity; GO:0016491,oxidoreductase activity; GO:0016209,antioxidant activity; GO:0016721,oxidoreductase activity, acting on superoxide radicals as acceptor; GO:0005622,in…	PF02777.18:Iron/manganese superoxide dismutases, C-terminal domain	--	--	--
MS.gene016126	down	up	--	--	XP_013465848.1	AHK5_ARATH RecName: Full=Histidine kinase 5; EC=2.7.13.3; AltName: Full=Arabidopsis histidine kinase 5; Short=AtHK5; AltName: Full=Protein AUTHENTIC HIS-KINASE 5; AltName: Full=Protein CYTOKININ-INDEPENDENT 2;	At5g10720	GO:0005737,cytoplasm; GO:0005887,integral component of plasma membrane; GO:0005886,plasma membrane; GO:0005773,vacuole; GO:0009927,histidine phosphotransfer kinase activity; GO:0046872,metal ion binding; GO:0000155,phosphorelay sensor kinase activity; GO:0004673,protein histidine kinase activity; GO:0009738,abscisic acid-activated signaling pathway; GO:0070301,cellular response to hydrogen peroxi…	PF00512.25:His Kinase A (phospho-acceptor) domain	--	--	--
MS.gene017642	down	up	K00475 naringenin 3-dioxygenase [EC:1.14.11.9] | (GenBank) naringenin 3-dioxygenase (flavanone-3-hydroxylase) (A)	ko00941: Flavonoid biosynthesis; ko01100: Metabolic pathways; ko01110: Biosynthesis of secondary metabolites	XP_003629323.1	FL3H_PETHY RecName: Full=Naringenin,2-oxoglutarate 3-dioxygenase; EC=1.14.11.9 {ECO:0000250|UniProtKB:Q7XZQ7}; AltName: Full=FHT; AltName: Full=Flavanone-3-hydroxylase; Short=F3H; Flags: Fragment;	At3g51240	GO:0031418,L-ascorbic acid binding; GO:0046872,metal ion binding; GO:0045486,naringenin 3-dioxygenase activity; GO:0009813,flavonoid biosynthetic process; GO:0003674,molecular_function; GO:0030246,carbohydrate binding; GO:0005488,binding; GO:0019842,vitamin binding; GO:0031406,carboxylic acid binding; GO:0036094,small molecule binding; GO:0043167,ion binding; GO:0043168,anion binding; GO:0043177,…	PF03171.20:2OG-Fe(II) oxygenase superfamily	--	--	--
MS.gene02080	down	up	K00430 peroxidase [EC:1.11.1.7] | (GenBank) peroxidase family protein (A)	ko00940: Phenylpropanoid biosynthesis; ko01100: Metabolic pathways; ko01110: Biosynthesis of secondary metabolites	XP_003594491.1	PER15_IPOBA RecName: Full=Peroxidase 15 {ECO:0000303|PubMed:17936696}; Short=Prx15 {ECO:0000303|PubMed:17936696}; EC=1.11.1.7; AltName: Full=Anionic peroxidase {ECO:0000303|PubMed:17936696}; Flags: Precursor;	At2g38380	GO:0005576,extracellular region; GO:0020037,heme binding; GO:0046872,metal ion binding; GO:0004601,peroxidase activity; GO:0042744,hydrogen peroxide catabolic process; GO:0006979,response to oxidative stress; GO:0003674,molecular_function; GO:0005488,binding; GO:0046906,tetrapyrrole binding; GO:0048037,cofactor binding; GO:0097159,organic cyclic compound binding; GO:1901363,heterocyclic compound …	PF00141.23:Peroxidase	--	--	--
MS.gene021652	down	up	K15040 voltage-dependent anion channel protein 2 | (GenBank) porin/voltage-dependent anion-selective channel protein (A)	--	XP_003621109.1	VDAC_PEA RecName: Full=Outer plastidial membrane protein porin; AltName: Full=Voltage-dependent anion-selective channel protein; Short=VDAC;	At3g01280	GO:0031307,integral component of mitochondrial outer membrane; GO:0009527,plastid outer membrane; GO:0046930,pore complex; GO:0015288,porin activity; GO:0008308,voltage-gated anion channel activity; GO:0003674,molecular_function; GO:0005215,transporter activity; GO:0022857,transmembrane transporter activity; GO:0015267,channel activity; GO:0022803,passive transmembrane transporter activity; GO:00…	PF01459.22:Eukaryotic porin	--	--	--
MS.gene023421	down	up	--	--	XP_013446572.1	--	At1g67350	GO:0005747,mitochondrial respiratory chain complex I; GO:0005622,intracellular; GO:0005575,cellular_component; GO:0016020,membrane; GO:0005739,mitochondrion; GO:0005623,cell; GO:0005737,cytoplasm; GO:0005740,mitochondrial envelope; GO:0005743,mitochondrial inner membrane; GO:0005746,mitochondrial respiratory chain; GO:0043231,intracellular membrane-bounded organelle; GO:0019866,organelle inner me…	PF17250.2:NADH-ubiquinone oxidoreductase 11 kDa subunit	--	--	--
MS.gene026707	down	up	--	--	XP_013466382.1	--	--	GO:0016021,integral component of membrane; GO:0005575,cellular_component; GO:0016020,membrane; GO:0031224,intrinsic component of membrane; GO:0044425,membrane part	PF06376.12:Arabinogalactan peptide	--	--	--
MS.gene029234	down	up	K15601 [histone H3]-dimethyl-L-lysine9 demethylase [EC:1.14.11.65] | (GenBank) transcription factor jumonji (JmjC) domain protein (A)	--	XP_003592704.2	JMJ25_ARATH RecName: Full=Lysine-specific demethylase JMJ25; EC=1.14.11.-; AltName: Full=Jumonji domain-containing protein 25; AltName: Full=Lysine-specific histone demethylase JMJ25; AltName: Full=Protein INCREASE IN BONSAI METHYLATION 1; AltName: Full=Protein JUMONJI 25;	At3g07610	GO:0000785,chromatin; GO:0000118,histone deacetylase complex; GO:0031490,chromatin DNA binding; GO:0051213,dioxygenase activity; GO:0032454,histone demethylase activity (H3-K9 specific); GO:0046872,metal ion binding; GO:0003712,transcription coregulator activity; GO:0033169,histone H3-K9 demethylation; GO:0060969,negative regulation of gene silencing; GO:0006357,regulation of transcription by RNA…	PF02373.22:JmjC domain, hydroxylase	Jumonji	TR	Jumonji
MS.gene031895	down	up	--	--	XP_003601039.1	Y2048_ARATH RecName: Full=WEB family protein At2g40480;	At2g40480	GO:0005829,cytosol; GO:0009904,chloroplast accumulation movement; GO:0009903,chloroplast avoidance movement; GO:0006996,organelle organization; GO:0008150,biological_process; GO:0009657,plastid organization; GO:0009658,chloroplast organization; GO:0009902,chloroplast relocation; GO:0009987,cellular process; GO:0016043,cellular component organization; GO:0019750,chloroplast localization; GO:005117…	PF05701.11:Weak chloroplast movement under blue light	--	--	--
MS.gene039663	down	up	K00930 acetylglutamate kinase [EC:2.7.2.8] | (RefSeq) acetylglutamate kinase, chloroplastic (A)	ko00220: Arginine biosynthesis; ko01100: Metabolic pathways; ko01110: Biosynthesis of secondary metabolites; ko01210: 2-Oxocarboxylic acid metabolism; ko01230: Biosynthesis of amino acids	XP_003526445.1	NAGK_ARATH RecName: Full=Acetylglutamate kinase, chloroplastic; EC=2.7.2.8; AltName: Full=N-acetyl-L-glutamate 5-phosphotransferase; AltName: Full=NAG kinase; Short=AtNAGK; Flags: Precursor;	At3g57560	GO:0009507,chloroplast; GO:0009570,chloroplast stroma; GO:0009534,chloroplast thylakoid; GO:0005829,cytosol; GO:0005759,mitochondrial matrix; GO:0003991,acetylglutamate kinase activity; GO:0034618,arginine binding; GO:0005524,ATP binding; GO:0006526,arginine biosynthetic process; GO:0042450,arginine biosynthetic process via ornithine; GO:0003674,molecular_function; GO:0003824,catalytic activity; …	--	--	--	--
MS.gene039767	down	up	K19784 chromate reductase, NAD(P)H dehydrogenase (quinone) | (GenBank) NADPH:quinone oxidoreductase-like protein (A)	--	XP_003598677.2	NQR_ARATH RecName: Full=NADPH:quinone oxidoreductase; EC=1.6.5.2;	At3g27890	GO:0009507,chloroplast; GO:0009570,chloroplast stroma; GO:0005829,cytosol; GO:0005886,plasma membrane; GO:0010181,FMN binding; GO:0050136,NADH dehydrogenase (quinone) activity; GO:0008753,NADPH dehydrogenase (quinone) activity; GO:0042742,defense response to bacterium; GO:0000166,nucleotide binding; GO:0003674,molecular_function; GO:0005488,binding; GO:0032553,ribonucleotide binding; GO:0036094,s…	PF03358.15:NADPH-dependent FMN reductase	--	--	--
MS.gene049312	down	up	K10260 F-box and WD-40 domain protein 7 | (RefSeq) WD40/YVTN repeat-like-containing domain (A)	ko04120: Ubiquitin mediated proteolysis	XP_003602564.1	PUB27_ARATH RecName: Full=U-box domain-containing protein 27; EC=2.3.2.27; AltName: Full=Plant U-box protein 27; AltName: Full=RING-type E3 ubiquitin transferase PUB27 {ECO:0000305};	At5g64660	GO:0004842,ubiquitin-protein transferase activity; GO:0010200,response to chitin; GO:0003674,molecular_function; GO:0003824,catalytic activity; GO:0016740,transferase activity; GO:0019787,ubiquitin-like protein transferase activity; GO:0140096,catalytic activity, acting on a protein; GO:0008150,biological_process; GO:0042493,response to drug; GO:0010033,response to organic substance; GO:0010243,r…	PF04564.15:U-box domain	--	--	--
MS.gene059919	down	up	--	--	XP_013457858.1	DDR4_ARATH RecName: Full=DDT domain-containing protein DDR4 {ECO:0000305}; AltName: Full=DDT-related protein 4 {ECO:0000303|PubMed:23691993};	At1g18950	GO:0005634,nucleus; GO:0005622,intracellular; GO:0005575,cellular_component; GO:0005623,cell; GO:0043231,intracellular membrane-bounded organelle; GO:0043226,organelle; GO:0043227,membrane-bounded organelle; GO:0043229,intracellular organelle; GO:0044424,intracellular part; GO:0044464,cell part	PF15612.6:WSTF, HB1, Itc1p, MBD9 motif 1	DDT	TR	DDT
MS.gene064413	down	up	K12385 Niemann-Pick C1 protein | (GenBank) niemann-pick C1-like protein (A)	--	XP_013462284.1	--	At1g42470	GO:0016021,integral component of membrane; GO:0005319,lipid transporter activity; GO:0003674,molecular_function; GO:0005215,transporter activity; GO:0005575,cellular_component; GO:0016020,membrane; GO:0031224,intrinsic component of membrane; GO:0044425,membrane part	PF02460.18:Patched family	--	--	--
MS.gene065606	down	up	--	--	XP_003619571.1	PIP21_PEA RecName: Full=Kunitz-type trypsin inhibitor-like 1 protein; AltName: Full=Protease inhibitor from pea 1; Flags: Precursor;	--	GO:0005576,extracellular region; GO:0004867,serine-type endopeptidase inhibitor activity; GO:0003674,molecular_function; GO:0004857,enzyme inhibitor activity; GO:0004866,endopeptidase inhibitor activity; GO:0061135,endopeptidase regulator activity; GO:0098772,molecular function regulator; GO:0030414,peptidase inhibitor activity; GO:0030234,enzyme regulator activity; GO:0061134,peptidase regulator…	PF00197.18:Trypsin and protease inhibitor	--	--	--
MS.gene066940	down	up	K01742 thebaine synthase [EC:4.2.99.24] | (RefSeq) major latex protein 149-like (A)	ko00950: Isoquinoline alkaloid biosynthesis; ko01100: Metabolic pathways; ko01110: Biosynthesis of secondary metabolites	XP_013445249.1	MLP43_ARATH RecName: Full=MLP-like protein 43;	At1g70890	GO:0009507,chloroplast; GO:0005829,cytosol; GO:0005739,mitochondrion; GO:0006952,defense response; GO:0006950,response to stress; GO:0008150,biological_process; GO:0050896,response to stimulus; GO:0005622,intracellular; GO:0005575,cellular_component; GO:0005623,cell; GO:0005737,cytoplasm; GO:0043231,intracellular membrane-bounded organelle; GO:0009536,plastid; GO:0043226,organelle; GO:0043227,mem…	PF00407.19:Pathogenesis-related protein Bet v I family	--	--	--
MS.gene08096	down	up	K02469 DNA gyrase subunit A [EC:5.6.2.2] | (RefSeq) DNA gyrase subunit A, chloroplastic/mitochondrial-like (A)	--	KOM57180.1	--	At1g36590_2	GO:0003676,nucleic acid binding; GO:0016740,transferase activity; GO:0015074,DNA integration; GO:0003674,molecular_function; GO:0005488,binding; GO:0097159,organic cyclic compound binding; GO:1901363,heterocyclic compound binding; GO:0003824,catalytic activity; GO:0008152,metabolic process; GO:0006139,nucleobase-containing compound metabolic process; GO:0006259,DNA metabolic process; GO:0006725,c…	PF00385.24:Chromo (CHRromatin Organisation MOdifier) domain	--	--	--
MS.gene09041	down	up	K14308 nuclear pore complex protein Nup54 | (RefSeq) LOW QUALITY PROTEIN: uncharacterized protein LOC106359187 (A)	ko03013: RNA transport	XP_013446556.1	FBK28_ARATH RecName: Full=F-box/kelch-repeat protein At1g67480;	At1g67480	--	PF01344.25:Kelch motif	--	--	--
MS.gene36780	down	up	K03231 elongation factor 1-alpha | (GenBank) elongation factor 1-alpha (A)	ko03013: RNA transport	XP_013469711.1	EF1A_ORYSJ RecName: Full=Elongation factor 1-alpha; Short=EF-1-alpha;	At1g07920	GO:0005737,cytoplasm; GO:0005525,GTP binding; GO:0003924,GTPase activity; GO:0003746,translation elongation factor activity; GO:0006412,translation; GO:0006414,translational elongation; GO:0000166,nucleotide binding; GO:0001882,nucleoside binding; GO:0001883,purine nucleoside binding; GO:0003674,molecular_function; GO:0005488,binding; GO:0017076,purine nucleotide binding; GO:0019001,guanyl nucleo…	PF00009.27:Elongation factor Tu GTP binding domain	--	--	--
MS.gene36960	down	up	K03231 elongation factor 1-alpha | (GenBank) elongation factor 1-alpha (A)	ko03013: RNA transport	XP_003626999.1	EF1A_VICFA RecName: Full=Elongation factor 1-alpha; Short=EF-1-alpha;	At1g07920	GO:0005737,cytoplasm; GO:0005525,GTP binding; GO:0003924,GTPase activity; GO:0003746,translation elongation factor activity; GO:0000166,nucleotide binding; GO:0001882,nucleoside binding; GO:0001883,purine nucleoside binding; GO:0003674,molecular_function; GO:0005488,binding; GO:0017076,purine nucleotide binding; GO:0019001,guanyl nucleotide binding; GO:0032549,ribonucleoside binding; GO:0032550,p…	PF03143.17:Elongation factor Tu C-terminal domain	--	--	--
MS.gene60716	down	up	K02964 small subunit ribosomal protein S18e | (GenBank) ribosomal protein S13P/S18e (A)	ko03010: Ribosome	XP_003592049.1	RS18_ARATH RecName: Full=40S ribosomal protein S18;	At1g22780	GO:0005618,cell wall; GO:0005829,cytosol; GO:0022626,cytosolic ribosome; GO:0022627,cytosolic small ribosomal subunit; GO:0005730,nucleolus; GO:0005634,nucleus; GO:0005886,plasma membrane; GO:0009506,plasmodesma; GO:0005840,ribosome; GO:0015935,small ribosomal subunit; GO:0005774,vacuolar membrane; GO:0005773,vacuole; GO:0003729,mRNA binding; GO:0019843,rRNA binding; GO:0003735,structural constit…	PF00416.22:Ribosomal protein S13/S18	--	--	--
MS.gene82911	down	up	K10842 CDK-activating kinase assembly factor MAT1 | (GenBank) CDK-activating kinase assembly factor MAT1, putative (A)	ko03022: Basal transcription factors; ko03420: Nucleotide excision repair	XP_003618273.1	--	At4g30820_1	GO:0005675,transcription factor TFIIH holo complex; GO:0016301,kinase activity; GO:0006281,DNA repair; GO:0000079,regulation of cyclin-dependent protein serine/threonine kinase activity; GO:0006357,regulation of transcription by RNA polymerase II; GO:0003674,molecular_function; GO:0003824,catalytic activity; GO:0016740,transferase activity; GO:0016772,transferase activity, transferring phosphorus…	PF06391.13:CDK-activating kinase assembly factor MAT1	--	--	--
MS.gene94703	down	up	K00695 sucrose synthase [EC:2.4.1.13] | (GenBank) sucrose synthase (A)	ko00500: Starch and sucrose metabolism; ko01100: Metabolic pathways; ko01110: Biosynthesis of secondary metabolites	XP_013449178.1	TMVRN_NICGU RecName: Full=TMV resistance protein N; EC=3.2.2.6 {ECO:0000255|PROSITE-ProRule:PRU00204};	At5g17680	GO:0005737,cytoplasm; GO:0043531,ADP binding; GO:0005524,ATP binding; GO:0050135,NAD(P)+ nucleosidase activity; GO:0061809,NAD+ nucleotidase, cyclic ADP-ribose generating; GO:0009626,plant-type hypersensitive response; GO:0007165,signal transduction; GO:0000166,nucleotide binding; GO:0003674,molecular_function; GO:0005488,binding; GO:0017076,purine nucleotide binding; GO:0030554,adenyl nucleotide…	PF00931.22:NB-ARC domain	--	--	--
MS.gene96064	down	up	--	--	XP_003623784.1	--	At2g45520	--	--	--	--	--
novel.11043	down	up	--	--	--	--	--	--	--	--	--	--
novel.4771	down	up	--	--	XP_003593621.1	DRM1_PEA RecName: Full=Dormancy-associated protein 1 {ECO:0000303|PubMed:9684359}; Short=PsDRM1 {ECO:0000303|PubMed:9684359};	--	GO:0007275,multicellular organism development; GO:0008150,biological_process; GO:0032501,multicellular organismal process; GO:0032502,developmental process; GO:0048856,anatomical structure development	--	--	--	--
novel.5861	down	up	--	--	XP_003598614.1	--	--	GO:0016021,integral component of membrane; GO:0005575,cellular_component; GO:0016020,membrane; GO:0031224,intrinsic component of membrane; GO:0044425,membrane part	--	--	--	--
novel.9110	down	up	--	--	--	--	--	--	--	--	--	--
MS.gene004239	up	up	K08332 vacuolar protein 8 | (RefSeq) LOW QUALITY PROTEIN: U-box domain-containing protein 3 (A)	--	XP_003593767.1	PUB45_ARATH RecName: Full=U-box domain-containing protein 45; EC=2.3.2.27; AltName: Full=Plant U-box protein 45; AltName: Full=RING-type E3 ubiquitin transferase PUB45 {ECO:0000305};	At2g27430	GO:0005737,cytoplasm; GO:0005634,nucleus; GO:0070696,transmembrane receptor protein serine/threonine kinase binding; GO:0004842,ubiquitin-protein transferase activity; GO:0016567,protein ubiquitination; GO:0005515,protein binding; GO:0003674,molecular_function; GO:0005102,signaling receptor binding; GO:0005488,binding; GO:0033612,receptor serine/threonine kinase binding; GO:0003824,catalytic acti…	PF00514.23:Armadillo/beta-catenin-like repeat	--	--	--
MS.gene005306	up	up	K06674 structural maintenance of chromosome 2 | (RefSeq) hypothetical protein (A)	--	XP_003591211.1	USPAL_ARATH RecName: Full=Universal stress protein A-like protein;	At3g62550	GO:0005829,cytosol; GO:0005886,plasma membrane; GO:0016208,AMP binding; GO:0000166,nucleotide binding; GO:0003674,molecular_function; GO:0005488,binding; GO:0008144,drug binding; GO:0017076,purine nucleotide binding; GO:0030554,adenyl nucleotide binding; GO:0032553,ribonucleotide binding; GO:0032555,purine ribonucleotide binding; GO:0032559,adenyl ribonucleotide binding; GO:0036094,small molecule…	PF00582.26:Universal stress protein family	--	--	--
MS.gene00901	up	up	--	--	XP_003594125.1	--	At1g55230	GO:0016021,integral component of membrane; GO:0005575,cellular_component; GO:0016020,membrane; GO:0031224,intrinsic component of membrane; GO:0044425,membrane part	PF04819.12:Family of unknown function (DUF716)	--	--	--
MS.gene011756	up	up	K13260 isoflavone/4'-methoxyisoflavone 2'-hydroxylase [EC:1.14.14.90 1.14.14.89] | (GenBank) cytochrome P450 family protein (A)	ko00943: Isoflavonoid biosynthesis; ko01100: Metabolic pathways; ko01110: Biosynthesis of secondary metabolites	ACJ85868.1	C81E8_MEDTR RecName: Full=Cytochrome P450 81E8 {ECO:0000303|PubMed:14617078}; EC=1.14.13.- {ECO:0000305};	At4g37370	GO:0016021,integral component of membrane; GO:0020037,heme binding; GO:0005506,iron ion binding; GO:0004497,monooxygenase activity; GO:0016705,oxidoreductase activity, acting on paired donors, with incorporation or reduction of molecular oxygen; GO:0003674,molecular_function; GO:0005488,binding; GO:0046906,tetrapyrrole binding; GO:0048037,cofactor binding; GO:0097159,organic cyclic compound bindi…	PF00067.22:Cytochrome P450	--	--	--
MS.gene015472	up	up	K00002 alcohol dehydrogenase (NADP+) [EC:1.1.1.2] | (RefSeq) aldo-keto reductase family 4 member C9-like (A)	ko00010: Glycolysis / Gluconeogenesis; ko00040: Pentose and glucuronate interconversions; ko00053: Ascorbate and aldarate metabolism; ko00561: Glycerolipid metabolism; ko00620: Pyruvate metabolism; ko01100: Metabolic pathways; ko01110: Biosynthesis of secondary metabolites; ko01240: Biosynthesis of cofactors	XP_003611241.2	--	At2g45360	GO:0008168,methyltransferase activity; GO:0032259,methylation; GO:0003674,molecular_function; GO:0003824,catalytic activity; GO:0016740,transferase activity; GO:0016741,transferase activity, transferring one-carbon groups; GO:0008152,metabolic process; GO:0008150,biological_process	PF07279.11:Protein of unknown function (DUF1442)	--	--	--
MS.gene024202	up	up	--	--	XP_003624395.2	--	--	--	--	--	--	--
MS.gene024838	up	up	K05894 12-oxophytodienoic acid reductase [EC:1.3.1.42] | (GenBank) 12-oxophytodienoate reductase-like protein (A)	ko00592: alpha-Linolenic acid metabolism; ko01100: Metabolic pathways; ko01110: Biosynthesis of secondary metabolites	XP_003610759.1	OPR11_ORYSJ RecName: Full=Putative 12-oxophytodienoate reductase 11; EC=1.3.1.-; AltName: Full=OPDA-reductase 11; Short=OsOPR11;	At1g76690	GO:0010181,FMN binding; GO:0016491,oxidoreductase activity; GO:0006633,fatty acid biosynthetic process; GO:0031408,oxylipin biosynthetic process; GO:0000166,nucleotide binding; GO:0003674,molecular_function; GO:0005488,binding; GO:0032553,ribonucleotide binding; GO:0036094,small molecule binding; GO:0043167,ion binding; GO:0043168,anion binding; GO:0048037,cofactor binding; GO:0050662,coenzyme bi…	PF00724.20:NADH:flavin oxidoreductase / NADH oxidase family	--	--	--
MS.gene032515	up	up	K01188 beta-glucosidase [EC:3.2.1.21] | (RefSeq) beta-glucosidase 12 (A)	ko00460: Cyanoamino acid metabolism; ko00500: Starch and sucrose metabolism; ko00940: Phenylpropanoid biosynthesis; ko01100: Metabolic pathways; ko01110: Biosynthesis of secondary metabolites	XP_003621809.1	PGIP_PYRCO RecName: Full=Polygalacturonase inhibitor; AltName: Full=Polygalacturonase-inhibiting protein; Short=PGIG; Flags: Precursor;	At5g06870	GO:0048046,apoplast; GO:0005618,cell wall; GO:0005575,cellular_component; GO:0005576,extracellular region; GO:0005623,cell; GO:0030312,external encapsulating structure; GO:0044464,cell part; GO:0071944,cell periphery	PF13855.6:Leucine rich repeat	--	--	--
MS.gene048332	up	up	--	--	ACJ84100.1	--	--	--	--	--	--	--
MS.gene056649	up	up	--	--	XP_013456342.1	--	At5g66580	--	PF14009.6:Domain of unknown function (DUF4228)	--	--	--
MS.gene07054	up	up	--	--	XP_003625968.1	BZP53_ARATH RecName: Full=bZIP transcription factor 53 {ECO:0000303|PubMed:11906833}; Short=AtbZIP53 {ECO:0000303|PubMed:11906833};	At3g62420	GO:0005634,nucleus; GO:0003700,DNA-binding transcription factor activity; GO:0045735,nutrient reservoir activity; GO:0046982,protein heterodimerization activity; GO:0043565,sequence-specific DNA binding; GO:0000976,transcription regulatory region sequence-specific DNA binding; GO:0009267,cellular response to starvation; GO:0006971,hypotonic response; GO:2000693,positive regulation of seed maturat…	PF00170.21:bZIP transcription factor	bZIP	TF	bZIP
MS.gene070872	up	up	K23232 8-hydroxygeraniol dehydrogenase [EC:1.1.1.324] | (RefSeq) 8-hydroxygeraniol dehydrogenase (A)	ko00902: Monoterpenoid biosynthesis; ko01100: Metabolic pathways; ko01110: Biosynthesis of secondary metabolites	XP_003612978.1	MTDH_FRAAN RecName: Full=Probable mannitol dehydrogenase; EC=1.1.1.255; AltName: Full=NAD-dependent mannitol dehydrogenase;	At4g37990	GO:0046029,mannitol dehydrogenase activity; GO:0008270,zinc ion binding; GO:0003674,molecular_function; GO:0003824,catalytic activity; GO:0016491,oxidoreductase activity; GO:0016614,oxidoreductase activity, acting on CH-OH group of donors; GO:0016616,oxidoreductase activity, acting on the CH-OH group of donors, NAD or NADP as acceptor; GO:0031320,hexitol dehydrogenase activity; GO:0005488,binding…	PF08240.12:Alcohol dehydrogenase GroES-like domain	--	--	--
MS.gene074091	up	up	K09841 xanthoxin dehydrogenase [EC:1.1.1.288] | (RefSeq) xanthoxin dehydrogenase (A)	ko00906: Carotenoid biosynthesis; ko01100: Metabolic pathways; ko01110: Biosynthesis of secondary metabolites	XP_003618852.1	NEPS2_NEPRA RecName: Full=(+)-cis,trans-nepetalactol synthase NEPS2 {ECO:0000305}; EC=5.5.1.34 {ECO:0000269|PubMed:30531909, ECO:0000269|PubMed:30664302}; AltName: Full=Nepetalactol-related short-chain reductase 2 {ECO:0000303|PubMed:30531909}; Short=NmNEPS2 {ECO:0000303|PubMed:30531909};	At2g47140	GO:0016853,isomerase activity; GO:0016491,oxidoreductase activity; GO:0003674,molecular_function; GO:0003824,catalytic activity	PF13561.6:Enoyl-(Acyl carrier protein) reductase	--	--	--
MS.gene21813	up	up	K05894 12-oxophytodienoic acid reductase [EC:1.3.1.42] | (GenBank) 12-oxophytodienoate reductase-like protein (A)	ko00592: alpha-Linolenic acid metabolism; ko01100: Metabolic pathways; ko01110: Biosynthesis of secondary metabolites	XP_003610758.1	OPR11_ORYSJ RecName: Full=Putative 12-oxophytodienoate reductase 11; EC=1.3.1.-; AltName: Full=OPDA-reductase 11; Short=OsOPR11;	At1g76690	GO:0010181,FMN binding; GO:0016491,oxidoreductase activity; GO:0006633,fatty acid biosynthetic process; GO:0031408,oxylipin biosynthetic process; GO:0000166,nucleotide binding; GO:0003674,molecular_function; GO:0005488,binding; GO:0032553,ribonucleotide binding; GO:0036094,small molecule binding; GO:0043167,ion binding; GO:0043168,anion binding; GO:0048037,cofactor binding; GO:0050662,coenzyme bi…	PF00724.20:NADH:flavin oxidoreductase / NADH oxidase family	--	--	--
MS.gene22556	up	up	K00002 alcohol dehydrogenase (NADP+) [EC:1.1.1.2] | (RefSeq) aldo-keto reductase family 4 member C9-like (A)	ko00010: Glycolysis / Gluconeogenesis; ko00040: Pentose and glucuronate interconversions; ko00053: Ascorbate and aldarate metabolism; ko00561: Glycerolipid metabolism; ko00620: Pyruvate metabolism; ko01100: Metabolic pathways; ko01110: Biosynthesis of secondary metabolites; ko01240: Biosynthesis of cofactors	XP_003611239.1	--	At2g45360	--	PF07279.11:Protein of unknown function (DUF1442)	--	--	--
MS.gene24453	up	up	K22419 Delta4-3-oxosteroid 5beta-reductase [EC:1.3.1.3] | (GenBank) 3-oxo-delta(4,5)-steroid 5-beta-reductase-like protein (A)	--	ABD33275.2	CYC2_CAMAC RecName: Full=(S)-8-oxocitronellyl enol synthase CYC2 {ECO:0000305}; EC=1.3.1.122 {ECO:0000269|PubMed:27432874}; AltName: Full=Cyclase 2 {ECO:0000303|PubMed:27432874}; AltName: Full=Iridoid synthase {ECO:0000305}; Short=ISY {ECO:0000305};	At4g24220	GO:0016627,oxidoreductase activity, acting on the CH-CH group of donors; GO:0043693,monoterpene biosynthetic process; GO:0003674,molecular_function; GO:0003824,catalytic activity; GO:0016491,oxidoreductase activity; GO:0008152,metabolic process; GO:0006629,lipid metabolic process; GO:0006720,isoprenoid metabolic process; GO:0008150,biological_process; GO:0008299,isoprenoid biosynthetic process; G…	PF01370.21:NAD dependent epimerase/dehydratase family	--	--	--
MS.gene29793	up	up	K13448 calcium-binding protein CML | (GenBank) EF hand calcium-binding family protein (A)	ko04626: Plant-pathogen interaction	KRH54197.1	--	--	--	--	--	--	--
MS.gene32201	up	up	--	--	AFK44316.1	FB316_ARATH RecName: Full=F-box protein At1g61340;	At1g61340	GO:0071456,cellular response to hypoxia; GO:0009961,response to 1-aminocyclopropane-1-carboxylic acid; GO:0009737,response to abscisic acid; GO:0009617,response to bacterium; GO:0009753,response to jasmonic acid; GO:0006970,response to osmotic stress; GO:0009751,response to salicylic acid; GO:0009651,response to salt stress; GO:0009611,response to wounding; GO:0001666,response to hypoxia; GO:0006…	--	--	--	--
MS.gene34342	up	up	--	--	XP_013450719.1	GT121_ARATH RecName: Full=Putative glutamine amidotransferase GAT1_2.1 {ECO:0000305}; EC=2.4.2.- {ECO:0000305}; AltName: Full=Class I glutamine amidotransferase {ECO:0000303|PubMed:22885937}; AltName: Full=GAT1_2 domain-containing protein 1 {ECO:0000305};	At5g38200	GO:0016811,hydrolase activity, acting on carbon-nitrogen (but not peptide) bonds, in linear amides; GO:0016740,transferase activity; GO:0006541,glutamine metabolic process; GO:2000032,regulation of secondary shoot formation; GO:0003674,molecular_function; GO:0003824,catalytic activity; GO:0016787,hydrolase activity; GO:0016810,hydrolase activity, acting on carbon-nitrogen (but not peptide) bonds;…	PF07722.13:Peptidase C26	--	--	--
MS.gene40474	up	up	K05894 12-oxophytodienoic acid reductase [EC:1.3.1.42] | (GenBank) 12-oxophytodienoate reductase-like protein (A)	ko00592: alpha-Linolenic acid metabolism; ko01100: Metabolic pathways; ko01110: Biosynthesis of secondary metabolites	XP_003610759.1	OPR11_ORYSJ RecName: Full=Putative 12-oxophytodienoate reductase 11; EC=1.3.1.-; AltName: Full=OPDA-reductase 11; Short=OsOPR11;	At1g76690	GO:0010181,FMN binding; GO:0016491,oxidoreductase activity; GO:0006633,fatty acid biosynthetic process; GO:0031408,oxylipin biosynthetic process; GO:0000166,nucleotide binding; GO:0003674,molecular_function; GO:0005488,binding; GO:0032553,ribonucleotide binding; GO:0036094,small molecule binding; GO:0043167,ion binding; GO:0043168,anion binding; GO:0048037,cofactor binding; GO:0050662,coenzyme bi…	PF00724.20:NADH:flavin oxidoreductase / NADH oxidase family	--	--	--
MS.gene43278	up	up	--	--	XP_003608927.1	--	At1g19020	--	--	--	--	--
MS.gene43930	up	up	K11820 N-hydroxythioamide S-beta-glucosyltransferase [EC:2.4.1.195] | (GenBank) UDP-glucosyltransferase family protein (A)	ko00380: Tryptophan metabolism; ko00966: Glucosinolate biosynthesis; ko01100: Metabolic pathways; ko01110: Biosynthesis of secondary metabolites; ko01210: 2-Oxocarboxylic acid metabolism	XP_003613349.2	U74B1_ARATH RecName: Full=UDP-glycosyltransferase 74B1; AltName: Full=N-hydroxythioamide S-beta-glucosyltransferase; EC=2.4.1.195 {ECO:0000269|PubMed:15584955}; AltName: Full=Thiohydroximate S-glucosyltransferase;	At1g24100	GO:0005829,cytosol; GO:0005634,nucleus; GO:0080043,quercetin 3-O-glucosyltransferase activity; GO:0080044,quercetin 7-O-glucosyltransferase activity; GO:0047251,thiohydroximate beta-D-glucosyltransferase activity; GO:0102659,UDP-glucose: 4-methylthiobutylhydroximate S-glucosyltransferase activity; GO:0103100,UDP-glucose: 6-methylthiohexylhydroximate S-glucosyltransferase activity; GO:0103103,UDP-…	PF00201.18:UDP-glucoronosyl and UDP-glucosyl transferase	--	--	--
MS.gene43932	up	up	K11820 N-hydroxythioamide S-beta-glucosyltransferase [EC:2.4.1.195] | (GenBank) UDP-glucosyltransferase family protein (A)	ko00380: Tryptophan metabolism; ko00966: Glucosinolate biosynthesis; ko01100: Metabolic pathways; ko01110: Biosynthesis of secondary metabolites; ko01210: 2-Oxocarboxylic acid metabolism	XP_003613351.1	U74B1_ARATH RecName: Full=UDP-glycosyltransferase 74B1; AltName: Full=N-hydroxythioamide S-beta-glucosyltransferase; EC=2.4.1.195 {ECO:0000269|PubMed:15584955}; AltName: Full=Thiohydroximate S-glucosyltransferase;	At1g24100	GO:0005829,cytosol; GO:0005634,nucleus; GO:0080043,quercetin 3-O-glucosyltransferase activity; GO:0080044,quercetin 7-O-glucosyltransferase activity; GO:0047251,thiohydroximate beta-D-glucosyltransferase activity; GO:0102659,UDP-glucose: 4-methylthiobutylhydroximate S-glucosyltransferase activity; GO:0103100,UDP-glucose: 6-methylthiohexylhydroximate S-glucosyltransferase activity; GO:0103103,UDP-…	PF00201.18:UDP-glucoronosyl and UDP-glucosyl transferase	--	--	--
MS.gene45737	up	up	K11968 ariadne-1 [EC:2.3.2.31] | (RefSeq) probable E3 ubiquitin-protein ligase ARI2 isoform X1 (A)	--	Q9FVL0.1	HBL1_MEDSA RecName: Full=Non-symbiotic hemoglobin 1; AltName: Full=MEDsa GLB1;	At2g16060	GO:0005737,cytoplasm; GO:0016363,nuclear matrix; GO:0020037,heme binding; GO:0046872,metal ion binding; GO:0019825,oxygen binding; GO:0003674,molecular_function; GO:0005488,binding; GO:0046906,tetrapyrrole binding; GO:0048037,cofactor binding; GO:0097159,organic cyclic compound binding; GO:1901363,heterocyclic compound binding; GO:0043167,ion binding; GO:0043169,cation binding; GO:0008144,drug bi…	PF00042.22:Globin	--	--	--
MS.gene48582	up	up	K13264 isoflavone 7-O-glucoside-6''-O-malonyltransferase [EC:2.3.1.115] | (RefSeq) phenolic glucoside malonyltransferase 1-like (A)	ko00943: Isoflavonoid biosynthesis; ko00944: Flavone and flavonol biosynthesis	XP_003621460.2	PMAT1_ARATH RecName: Full=Phenolic glucoside malonyltransferase 1; EC=2.3.1.-;	At5g39050	GO:0005829,cytosol; GO:0050736,O-malonyltransferase activity; GO:0009636,response to toxic substance; GO:0003674,molecular_function; GO:0003824,catalytic activity; GO:0008374,O-acyltransferase activity; GO:0016420,malonyltransferase activity; GO:0016740,transferase activity; GO:0016746,transferase activity, transferring acyl groups; GO:0016747,transferase activity, transferring acyl groups other …	PF02458.15:Transferase family	--	--	--
MS.gene49270	up	up	K13448 calcium-binding protein CML | (RefSeq) putative calcium-binding protein CML19 (A)	ko04626: Plant-pathogen interaction	KRH54197.1	--	--	--	--	--	--	--
MS.gene50632	up	up	K14516 ethylene-responsive transcription factor 1 | (GenBank) AP2 domain class transcription factor (A)	ko04016: MAPK signaling pathway - plant; ko04075: Plant hormone signal transduction	XP_013468495.1	ERF92_ARATH RecName: Full=Ethylene-responsive transcription factor 1B; Short=AtERF1B; AltName: Full=Ethylene-responsive element-binding factor 1B; Short=EREBP-1B;	At3g23240	GO:0005634,nucleus; GO:0003677,DNA binding; GO:0003700,DNA-binding transcription factor activity; GO:0000976,transcription regulatory region sequence-specific DNA binding; GO:0006952,defense response; GO:0009873,ethylene-activated signaling pathway; GO:0009867,jasmonic acid mediated signaling pathway; GO:0003674,molecular_function; GO:0003676,nucleic acid binding; GO:0005488,binding; GO:0097159,o…	PF00847.20:AP2 domain	AP2/ERF-ERF	TF	AP2/ERF->AP2/ERF-ERF
MS.gene66256	up	up	K00640 serine O-acetyltransferase [EC:2.3.1.30] | (GenBank) serine acetyltransferase (A)	ko00270: Cysteine and methionine metabolism; ko00920: Sulfur metabolism; ko01100: Metabolic pathways; ko01110: Biosynthesis of secondary metabolites; ko01200: Carbon metabolism; ko01230: Biosynthesis of amino acids	XP_013459995.1	SAT3_ARATH RecName: Full=Serine acetyltransferase 3, mitochondrial; Short=AtSAT-3; Short=AtSERAT2;2; Short=SAT-m; EC=2.3.1.30; Flags: Precursor;	At3g13110	GO:0005829,cytosol; GO:0005739,mitochondrion; GO:0009001,serine O-acetyltransferase activity; GO:0008270,zinc ion binding; GO:0019344,cysteine biosynthetic process; GO:0006535,cysteine biosynthetic process from serine; GO:0046686,response to cadmium ion; GO:0003674,molecular_function; GO:0003824,catalytic activity; GO:0008374,O-acyltransferase activity; GO:0016407,acetyltransferase activity; GO:0…	PF06426.14:Serine acetyltransferase, N-terminal	--	--	--
MS.gene71614	up	up	--	--	XP_013469983.1	--	--	--	--	--	--	--
MS.gene78901	up	up	K17873 11-oxo-beta-amyrin 30-oxidase [EC:1.14.14.115] | (GenBank) cytochrome P450 family 72 protein (A)	--	XP_003628067.1	C7263_MEDTR RecName: Full=11-oxo-beta-amyrin 30-oxidase; EC=1.14.14.115 {ECO:0000269|PubMed:22128119}; AltName: Full=Cytochrome P450 72A63;	At3g14690	GO:0016021,integral component of membrane; GO:0102375,11-oxo-beta-amyrin 30-oxidase activity; GO:0020037,heme binding; GO:0005506,iron ion binding; GO:0016709,oxidoreductase activity, acting on paired donors, with incorporation or reduction of molecular oxygen, NAD(P)H as one donor, and incorporation of one atom of oxygen; GO:1902382,11-oxo-beta-amyrin catabolic process; GO:1902386,glycyrrhetinat…	PF00067.22:Cytochrome P450	--	--	--
MS.gene80269	up	up	K07904 Ras-related protein Rab-11A | (RefSeq) LOW QUALITY PROTEIN: ras and EF-hand domain-containing protein (A)	ko04144: Endocytosis	XP_003613226.1	--	At1g23710	--	PF07816.11:Protein of unknown function (DUF1645)	--	--	--
MS.gene82784	up	up	--	--	XP_013450719.1	GT121_ARATH RecName: Full=Putative glutamine amidotransferase GAT1_2.1 {ECO:0000305}; EC=2.4.2.- {ECO:0000305}; AltName: Full=Class I glutamine amidotransferase {ECO:0000303|PubMed:22885937}; AltName: Full=GAT1_2 domain-containing protein 1 {ECO:0000305};	At5g38200	GO:0016811,hydrolase activity, acting on carbon-nitrogen (but not peptide) bonds, in linear amides; GO:0016740,transferase activity; GO:0006541,glutamine metabolic process; GO:2000032,regulation of secondary shoot formation; GO:0003674,molecular_function; GO:0003824,catalytic activity; GO:0016787,hydrolase activity; GO:0016810,hydrolase activity, acting on carbon-nitrogen (but not peptide) bonds;…	PF07722.13:Peptidase C26	--	--	--
MS.gene82913	up	up	--	--	AFK38768.1	--	--	--	PF07816.11:Protein of unknown function (DUF1645)	--	--	--
MS.gene86524	up	up	K24139 auxin efflux carrier family protein | (GenBank) auxin efflux carrier family protein (A)	--	XP_003612402.1	PILS7_ARATH RecName: Full=Protein PIN-LIKES 7 {ECO:0000303|PubMed:22504182}; AltName: Full=Auxin efflux carrier-like protein 7 {ECO:0000303|PubMed:22504182};	At5g65980	GO:0005789,endoplasmic reticulum membrane; GO:0016021,integral component of membrane; GO:0009734,auxin-activated signaling pathway; GO:0009733,response to auxin; GO:0055085,transmembrane transport; GO:0007165,signal transduction; GO:0007154,cell communication; GO:0008150,biological_process; GO:0009719,response to endogenous stimulus; GO:0009725,response to hormone; GO:0009755,hormone-mediated sig…	PF03547.18:Membrane transport protein	--	--	--
MS.gene91775	up	up	K00924 kinase [EC:2.7.1.-] | (RefSeq) probable receptor-like protein kinase At3g55450 (A)	--	XP_003595279.1	RIPK_ARATH RecName: Full=Serine/threonine-protein kinase RIPK {ECO:0000305}; EC=2.7.11.1 {ECO:0000305|PubMed:21320696}; AltName: Full=ACIK1A/PBL14; AltName: Full=ACRE protein ortholog 264A {ECO:0000305}; Short=AtACRE264a {ECO:0000303|PubMed:15181213}; AltName: Full=PBS1-like protein 14 {ECO:0000303|PubMed:20413097}; AltName: Full=RPM1-induced protein kinase {ECO:0000303|PubMed:21320696};	At2g05940	GO:0005886,plasma membrane; GO:0005524,ATP binding; GO:0106310,NA; GO:0004674,protein serine/threonine kinase activity; GO:0106311,NA; GO:0042742,defense response to bacterium; GO:0006468,protein phosphorylation; GO:0000166,nucleotide binding; GO:0003674,molecular_function; GO:0005488,binding; GO:0008144,drug binding; GO:0017076,purine nucleotide binding; GO:0030554,adenyl nucleotide binding; GO:…	PF07714.17:Protein tyrosine kinase	--	--	--
MS.gene98636	up	up	K22745 apoptosis-inducing factor 2 | (GenBank) pyridine nucleotide-disulfide oxidoreductase family protein (A)	--	XP_013455748.1	NDC1_ARATH RecName: Full=Alternative NAD(P)H-ubiquinone oxidoreductase C1, chloroplastic/mitochondrial {ECO:0000303|PubMed:15333756}; EC=1.6.5.9 {ECO:0000269|PubMed:21844348}; AltName: Full=Alternative NADH dehydrogenase NDC1 {ECO:0000303|PubMed:15333756}; AltName: Full=Demethylphylloquinone reductase NDC1 {ECO:0000303|PubMed:26023160}; EC=1.6.5.12 {ECO:0000269|PubMed:21844348, ECO:0000269|PubMed…	At3g44190	GO:0009507,chloroplast; GO:0005743,mitochondrial inner membrane; GO:0005739,mitochondrion; GO:0010287,plastoglobule; GO:0003955,NAD(P)H dehydrogenase (quinone) activity; GO:0050136,NADH dehydrogenase (quinone) activity; GO:0016491,oxidoreductase activity; GO:0019646,aerobic electron transport chain; GO:0071482,cellular response to light stimulus; GO:0042372,phylloquinone biosynthetic process; GO:…	PF07992.14:Pyridine nucleotide-disulphide oxidoreductase	--	--	--
MS.gene98679	up	up	K09286 EREBP-like factor | (RefSeq) dehydration-responsive element-binding protein 2C-like (A)	--	XP_003623385.2	DRE2A_ARATH RecName: Full=Dehydration-responsive element-binding protein 2A; Short=Protein DREB2A;	At5g05410	GO:0005634,nucleus; GO:0003700,DNA-binding transcription factor activity; GO:0000976,transcription regulatory region sequence-specific DNA binding; GO:0071456,cellular response to hypoxia; GO:0010286,heat acclimation; GO:0045893,positive regulation of transcription, DNA-templated; GO:0009408,response to heat; GO:0042542,response to hydrogen peroxide; GO:0010224,response to UV-B; GO:0009414,respon…	PF00847.20:AP2 domain	AP2/ERF-ERF	TF	AP2/ERF->AP2/ERF-ERF
MS.gene99096	up	up	K04077 chaperonin GroEL | (RefSeq) chaperonin CPN60-like 2, mitochondrial (A)	ko03018: RNA degradation	XP_004490745.1	NHL6_ARATH RecName: Full=NDR1/HIN1-like protein 6 {ECO:0000303|PubMed:26849212};	At5g36970	GO:0005829,cytosol; GO:0016021,integral component of membrane; GO:0005886,plasma membrane; GO:0009738,abscisic acid-activated signaling pathway; GO:0010116,positive regulation of abscisic acid biosynthetic process; GO:0009737,response to abscisic acid; GO:0006970,response to osmotic stress; GO:1902074,response to salt; GO:0001101,response to acid chemical; GO:0007165,signal transduction; GO:00071…	PF03168.13:Late embryogenesis abundant protein	--	--	--
novel.11058	up	up	--	--	--	--	--	--	--	--	--	--
novel.11657	up	up	--	--	XP_003613226.1	--	At1g23710	--	PF07816.11:Protein of unknown function (DUF1645)	--	--	--
novel.12063	up	up	--	--	--	--	--	--	--	--	--	--
novel.17466	up	up	K13448 calcium-binding protein CML | (RefSeq) putative calcium-binding protein CML19 (A)	ko04626: Plant-pathogen interaction	XP_004515822.1	--	--	GO:0005509,calcium ion binding; GO:0003674,molecular_function; GO:0005488,binding; GO:0046872,metal ion binding; GO:0043167,ion binding; GO:0043169,cation binding	PF00036.32:EF hand	--	--	--
MS.gene004535	down	down	K15889 prenylcysteine alpha-carboxyl methylesterase [EC:3.1.1.-] | (RefSeq) probable isoprenylcysteine alpha-carbonyl methylesterase ICMEL2 (A)	ko00900: Terpenoid backbone biosynthesis; ko01100: Metabolic pathways; ko01110: Biosynthesis of secondary metabolites	PNX66071.1	--	At5g53670	--	PF14223.6:gag-polypeptide of LTR copia-type	--	--	--
MS.gene007509	down	down	--	--	XP_003625615.2	FLA11_ARATH RecName: Full=Fasciclin-like arabinogalactan protein 11; Flags: Precursor;	At5g03170	GO:0031225,anchored component of membrane; GO:0005886,plasma membrane; GO:0009834,plant-type secondary cell wall biogenesis; GO:0008150,biological_process; GO:0009832,plant-type cell wall biogenesis; GO:0009987,cellular process; GO:0042546,cell wall biogenesis; GO:0044085,cellular component biogenesis; GO:0071554,cell wall organization or biogenesis; GO:0071669,plant-type cell wall organization o…	PF02469.22:Fasciclin domain	--	--	--
MS.gene011174	down	down	K01495 GTP cyclohydrolase IA [EC:3.5.4.16] | (GenBank) GTP cyclohydrolase I 1 (A)	ko00790: Folate biosynthesis; ko01100: Metabolic pathways; ko01240: Biosynthesis of cofactors	XP_013444296.1	GCH1_SOLLC RecName: Full=GTP cyclohydrolase 1 {ECO:0000305}; EC=3.5.4.16 {ECO:0000269|PubMed:12221287}; AltName: Full=GTP cyclohydrolase I {ECO:0000303|PubMed:12221287};	At3g07270	GO:0005737,cytoplasm; GO:0005525,GTP binding; GO:0003934,GTP cyclohydrolase I activity; GO:0042803,protein homodimerization activity; GO:0008270,zinc ion binding; GO:0035998,7,8-dihydroneopterin 3'-triphosphate biosynthetic process; GO:0006729,tetrahydrobiopterin biosynthetic process; GO:0046654,tetrahydrofolate biosynthetic process; GO:0000166,nucleotide binding; GO:0001882,nucleoside binding; G…	PF01227.22:GTP cyclohydrolase I	--	--	--
MS.gene026605	down	down	--	--	XP_013466513.1	MLP43_ARATH RecName: Full=MLP-like protein 43;	At1g70890	GO:0009507,chloroplast; GO:0005829,cytosol; GO:0005739,mitochondrion; GO:0006952,defense response; GO:0006950,response to stress; GO:0008150,biological_process; GO:0050896,response to stimulus; GO:0005622,intracellular; GO:0005575,cellular_component; GO:0005623,cell; GO:0005737,cytoplasm; GO:0043231,intracellular membrane-bounded organelle; GO:0009536,plastid; GO:0043226,organelle; GO:0043227,mem…	PF00407.19:Pathogenesis-related protein Bet v I family	--	--	--
MS.gene25137	down	down	--	--	XP_003627277.1	AB19A_PRUPE RecName: Full=Auxin-binding protein ABP19a; Flags: Precursor;	At1g72610	GO:0048046,apoplast; GO:0005618,cell wall; GO:0030145,manganese ion binding; GO:0009734,auxin-activated signaling pathway; GO:0003674,molecular_function; GO:0005488,binding; GO:0046872,metal ion binding; GO:0043167,ion binding; GO:0043169,cation binding; GO:0046914,transition metal ion binding; GO:0007165,signal transduction; GO:0007154,cell communication; GO:0008150,biological_process; GO:000971…	PF00190.22:Cupin	--	--	--
MS.gene36734	down	down	K20728 vegetative storage protein 2 | (RefSeq) vegetative storage protein 2-like (A)	ko04016: MAPK signaling pathway - plant	XP_003627058.1	VSPA_SOYBN RecName: Full=Stem 28 kDa glycoprotein; AltName: Full=Vegetative storage protein A; Flags: Precursor;	At4g25150	GO:0045735,nutrient reservoir activity; GO:0003674,molecular_function	PF03767.14:HAD superfamily, subfamily IIIB (Acid phosphatase)	--	--	--
MS.gene75296	down	down	K07870 mitochondrial Rho GTPase 1 [EC:3.6.5.-] | (RefSeq) uncharacterized protein LOC103958384 (A)	--	XP_013462014.1	BSPA_POPDE RecName: Full=Bark storage protein A; Flags: Precursor;	At4g28940	GO:0003824,catalytic activity; GO:0045735,nutrient reservoir activity; GO:0009116,nucleoside metabolic process; GO:0003674,molecular_function; GO:0008152,metabolic process; GO:0006139,nucleobase-containing compound metabolic process; GO:0006725,cellular aromatic compound metabolic process; GO:0006807,nitrogen compound metabolic process; GO:0008150,biological_process; GO:0009987,cellular process; …	PF01048.20:Phosphorylase superfamily	--	--	--
