# Supplementary material for: Genome-wide transcriptomic analysis identifies candidate genes involved in jasmonic acid-mediated salt tolerance of alfalfa
Source: PeerJ. 2023 May 5;11:e15324. doi: 10.7717/peerj.15324 (PMC10166079; doi:10.7717/peerj.15324)
Supplement: Supplemental Information 4 [file peerj-11-15324-s004.xlsx]

## Sheet: C vs S
GeneID	exonStart_0base	exonEnd	upstreamES	upstreamEE	downstreamES	downstreamEE	IJC_SAMPLE_1	SJC_SAMPLE_1	IJC_SAMPLE_2	SJC_SAMPLE_2	IncFormLen	SkipFormLen	PValue	FDR	IncLevel1	IncLevel2	IncLevelDifference	regulation	chr	start	end	strand	gene_name	gene_description	KEGG	KEGG pathway	NR	Swissprot	KOG	GO	Pfam	TF-Family	TF-Category	TF-Classification
MS.gene86994	143759	143914	142594	142780	144252	144403	90,110,128	0,6,6	156,182,204	0,2,0	298	149	0.000315764	0.0120035	1.0,0.902,0.914	1.0,0.978,1.0	-0.054	down	chr2.3	140748	144403	-	--	--	K09753 cinnamoyl-CoA reductase [EC:1.2.1.44] | (GenBank) cinnamoyl-CoA reductase-like protein (A)	ko00940: Phenylpropanoid biosynthesis; ko01100: Metabolic pathways; ko01110: Biosynthesis of secondary metabolites	XP_013465595.1	CCR1_PETHY RecName: Full=Cinnamoyl-CoA reductase 1 {ECO:0000303|PubMed:24985707, ECO:0000303|PubMed:25217505}; Short=PhCCR1 {ECO:0000303|PubMed:24985707, ECO:0000303|PubMed:25217505}; EC=1.2.1.44 {ECO:0000250|UniProtKB:Q9S9N9}; AltName: Full=Coniferylaldehyde synthase {ECO:0000305}; EC=1.2.1.- {ECO:0000269|PubMed:24985707, ECO:0000269|PubMed:25217505};	At1g15950	GO:0005737,cytoplasm; GO:0016621,cinnamoyl-CoA reductase activity; GO:0000166,nucleotide binding; GO:0007623,circadian rhythm; GO:0010597,green leaf volatile biosynthetic process; GO:0009809,lignin biosynthetic process; GO:0009699,phenylpropanoid biosynthetic process; GO:0003674,molecular_function; GO:0003824,catalytic activity; GO:0016491,oxidoreductase activity; GO:0016620,oxidoreductase activi…	PF01370.21:NAD dependent epimerase/dehydratase family	--	--	--
MS.gene03218	74024266	74024333	74023977	74024029	74025191	74025294	143,209,182	0,0,15	152,462,279	2,0,0	215	149	0.00146198	0.0425172	1.0,1.0,0.894	0.981,1.0,1.0	-0.029	down	chr3.3	74023187	74025294	+	--	--	--	--	XP_013461302.1	--	At1g77350	GO:0016021,integral component of membrane; GO:0042543,protein N-linked glycosylation via arginine; GO:0008152,metabolic process; GO:0006464,cellular protein modification process; GO:0006486,protein glycosylation; GO:0006487,protein N-linked glycosylation; GO:0006807,nitrogen compound metabolic process; GO:0008150,biological_process; GO:0009058,biosynthetic process; GO:0009059,macromolecule biosyn…	PF09775.9:Keratinocyte-associated protein 2	--	--	--
MS.gene30664	28254	28325	28019	28117	32042	32070	92,8,22	4,0,11	25,121,19	0,0,0	219	149	7.29499e-06	0.000626193	0.94,1.0,0.576	1.0,1.0,1.0	-0.161	down	42997	17514	32324	+	--	--	K22757 glutaminyl-peptide cyclotransferase [EC:2.3.2.5] | (GenBank) glutamine cyclotransferase (A)	--	XP_013442952.1	QPCT_ARATH RecName: Full=Glutaminyl-peptide cyclotransferase; EC=2.3.2.5; AltName: Full=Glutaminyl cyclase;	At4g25720	GO:0005789,endoplasmic reticulum membrane; GO:0016021,integral component of membrane; GO:0005886,plasma membrane; GO:0016603,glutaminyl-peptide cyclotransferase activity; GO:0017186,peptidyl-pyroglutamic acid biosynthetic process, using glutaminyl-peptide cyclotransferase; GO:0003674,molecular_function; GO:0003824,catalytic activity; GO:0016740,transferase activity; GO:0016746,transferase activit…	PF05096.12:Glutamine cyclotransferase	--	--	--
MS.gene38737	83981503	83981591	83981173	83981240	83982041	83982254	21,23,12	2,4,4	7,27,23	0,1,0	236	149	2.41266e-05	0.00156588	0.869,0.784,0.654	1.0,0.945,1.0	-0.213	down	chr3.3	83977165	83982254	-	--	--	K01719 uroporphyrinogen-III synthase [EC:4.2.1.75] | (GenBank) uroporphyrinogen III synthase (A)	ko00860: Porphyrin and chlorophyll metabolism; ko01100: Metabolic pathways; ko01110: Biosynthesis of secondary metabolites; ko01240: Biosynthesis of cofactors	XP_003603006.1	HEM4_ARATH RecName: Full=Uroporphyrinogen-III synthase, chloroplastic; Short=AtUROS; EC=4.2.1.75; AltName: Full=Hydroxymethylbilane hydrolyase [cyclizing]; AltName: Full=Uroporphyrinogen-III cosynthase; Flags: Precursor;	At2g26540	GO:0009507,chloroplast; GO:0005777,peroxisome; GO:0004852,uroporphyrinogen-III synthase activity; GO:0015995,chlorophyll biosynthetic process; GO:0006782,protoporphyrinogen IX biosynthetic process; GO:0006780,uroporphyrinogen III biosynthetic process; GO:0003674,molecular_function; GO:0003824,catalytic activity; GO:0016829,lyase activity; GO:0016835,carbon-oxygen lyase activity; GO:0016836,hydro-…	PF02602.15:Uroporphyrinogen-III synthase HemD	--	--	--
MS.gene069843	21460309	21460383	21460147	21460196	21460790	21460865	61,108,117	3,10,4	22,44,47	0,0,0	222	149	3.85994e-05	0.00236122	0.932,0.879,0.952	1.0,1.0,1.0	-0.079	down	chr6.2	21459205	21462871	-	--	--	K13717 OTU domain-containing protein 3 [EC:3.4.19.12] | (RefSeq) OTU domain-containing protein 3 isoform X1 (A)	--	XP_013451591.1	OTU12_ARATH RecName: Full=OVARIAN TUMOR DOMAIN-containing deubiquitinating enzyme 12 {ECO:0000303|PubMed:24659992}; Short=OTU domain-containing protein 12 {ECO:0000303|PubMed:24659992}; EC=3.4.19.12 {ECO:0000250|UniProtKB:Q96G74}; AltName: Full=Deubiquitinating enzyme OTU12 {ECO:0000303|PubMed:24659992};	At3g02070	GO:0004843,thiol-dependent ubiquitin-specific protease activity; GO:0016579,protein deubiquitination; GO:0003674,molecular_function; GO:0003824,catalytic activity; GO:0008234,cysteine-type peptidase activity; GO:0036459,thiol-dependent ubiquitinyl hydrolase activity; GO:0008233,peptidase activity; GO:0070011,peptidase activity, acting on L-amino acid peptides; GO:0016787,hydrolase activity; GO:00…	PF02338.19:OTU-like cysteine protease	--	--	--
MS.gene83563	955437	955508	955021	955096	956808	958038	118,145,122	1,0,14	109,131,72	1,0,0	219	149	0.000420557	0.0154359	0.988,1.0,0.856	0.987,1.0,1.0	-0.048	down	chr2.2	951019	959355	-	--	--	K14972 PAX-interacting protein 1 | (GenBank) transcription cofactor, putative (A)	--	XP_003597955.1	MD15A_ARATH RecName: Full=Mediator of RNA polymerase II transcription subunit 15a;	At1g15780	GO:0016592,mediator complex; GO:0005634,nucleus; GO:0031490,chromatin DNA binding; GO:0003713,transcription coactivator activity; GO:0045723,positive regulation of fatty acid biosynthetic process; GO:0009751,response to salicylic acid; GO:0003674,molecular_function; GO:0003676,nucleic acid binding; GO:0003677,DNA binding; GO:0003682,chromatin binding; GO:0005488,binding; GO:0097159,organic cyclic…	PF16987.5:KIX domain	--	--	--
MS.gene048797	6077766	6077972	6077400	6077480	6078136	6078349	148,243,200	6,19,8	265,166,64	0,0,0	298	149	4.07414e-10	1.80688e-07	0.925,0.865,0.926	1.0,1.0,1.0	-0.095	down	chr4.3	6076250	6078349	+	--	--	K00799 glutathione S-transferase [EC:2.5.1.18] | (GenBank) glutathione S-transferase theta (A)	ko00480: Glutathione metabolism; ko01100: Metabolic pathways	AFK47457.1	GSTT1_ARATH RecName: Full=Glutathione S-transferase T1; Short=AtGSTT1; EC=2.5.1.18; AltName: Full=GST class-theta member 1; AltName: Full=Glutathione S-transferase 10;	At5g41210	GO:0005737,cytoplasm; GO:0005634,nucleus; GO:0005777,peroxisome; GO:0009536,plastid; GO:0004364,glutathione transferase activity; GO:0004601,peroxidase activity; GO:0006749,glutathione metabolic process; GO:0009407,toxin catabolic process; GO:0003674,molecular_function; GO:0003824,catalytic activity; GO:0016740,transferase activity; GO:0016765,transferase activity, transferring alkyl or aryl (oth…	PF02798.20:Glutathione S-transferase, N-terminal domain	--	--	--
MS.gene76820	76575551	76575623	76575344	76575416	76575716	76575860	18,49,40	0,0,0	17,37,10	0,2,11	220	149	0.00013288	0.00647149	1.0,1.0,1.0	1.0,0.926,0.381	0.231	up	chr1.1	76575140	76577038	-	--	--	K13418 somatic embryogenesis receptor kinase 1 [EC:2.7.10.1 2.7.11.1] | (RefSeq) LRR receptor kinase BAK1 (A)	--	XP_013469995.1	LRR1_ARATH RecName: Full=Leucine-rich repeat protein 1 {ECO:0000303|PubMed:19712067}; Short=AtLRR1 {ECO:0000303|PubMed:19712067}; Flags: Precursor;	At5g21090	GO:0006952,defense response; GO:0007165,signal transduction; GO:0006950,response to stress; GO:0008150,biological_process; GO:0050896,response to stimulus; GO:0007154,cell communication; GO:0009987,cellular process; GO:0023052,signaling; GO:0050789,regulation of biological process; GO:0050794,regulation of cellular process; GO:0051716,cellular response to stimulus; GO:0065007,biological regulation	PF13855.6:Leucine rich repeat	--	--	--
MS.gene65344	15331052	15331177	15330732	15330854	15331281	15331361	136,49,86	12,9,8	2,15,24	0,0,0	273	149	3.82626e-06	0.000384214	0.861,0.748,0.854	1.0,1.0,1.0	-0.179	down	chr5.2	15329400	15331602	-	--	--	K24139 auxin efflux carrier family protein | (GenBank) auxin efflux carrier family protein (A)	--	XP_013453598.1	PILS7_ARATH RecName: Full=Protein PIN-LIKES 7 {ECO:0000303|PubMed:22504182}; AltName: Full=Auxin efflux carrier-like protein 7 {ECO:0000303|PubMed:22504182};	At5g65980	GO:0005789,endoplasmic reticulum membrane; GO:0016021,integral component of membrane; GO:0009734,auxin-activated signaling pathway; GO:0009733,response to auxin; GO:0055085,transmembrane transport; GO:0007165,signal transduction; GO:0007154,cell communication; GO:0008150,biological_process; GO:0009719,response to endogenous stimulus; GO:0009725,response to hormone; GO:0009755,hormone-mediated sig…	PF03547.18:Membrane transport protein	--	--	--
MS.gene30663	13359	13430	13124	13222	13722	13750	328,105,261	6,10,4	219,222,183	3,2,0	219	149	0.00136962	0.040495	0.974,0.877,0.978	0.98,0.987,1.0	-0.046	down	42997	12864	14781	+	--	--	K22757 glutaminyl-peptide cyclotransferase [EC:2.3.2.5] | (GenBank) glutamine cyclotransferase (A)	--	XP_013442950.1	QPCT_ARATH RecName: Full=Glutaminyl-peptide cyclotransferase; EC=2.3.2.5; AltName: Full=Glutaminyl cyclase;	At4g25720	GO:0005789,endoplasmic reticulum membrane; GO:0016021,integral component of membrane; GO:0005886,plasma membrane; GO:0016603,glutaminyl-peptide cyclotransferase activity; GO:0017186,peptidyl-pyroglutamic acid biosynthetic process, using glutaminyl-peptide cyclotransferase; GO:0003674,molecular_function; GO:0003824,catalytic activity; GO:0016740,transferase activity; GO:0016746,transferase activit…	PF05096.12:Glutamine cyclotransferase	--	--	--
MS.gene025938	1197890	1197939	1197293	1197529	1198074	1198123	7,30,42	0,11,15	18,35,4	0,0,0	197	149	6.35365e-08	1.02467e-05	1.0,0.673,0.679	1.0,1.0,1.0	-0.216	down	chr7.1	1196462	1199608	-	--	--	K09060 plant G-box-binding factor | (GenBank) bZIP transcription factor family protein (A)	--	AEW66884.1	CPRF1_PETCR RecName: Full=Common plant regulatory factor 1; Short=CPRF-1;	At2g46270	GO:0005634,nucleus; GO:0003677,DNA binding; GO:0003700,DNA-binding transcription factor activity; GO:0003674,molecular_function; GO:0003676,nucleic acid binding; GO:0005488,binding; GO:0097159,organic cyclic compound binding; GO:1901363,heterocyclic compound binding; GO:0140110,transcription regulator activity; GO:0005622,intracellular; GO:0005575,cellular_component; GO:0005623,cell; GO:0043231,i…	PF07777.11:G-box binding protein MFMR	bZIP	TF	bZIP
MS.gene025938	1198511	1198553	1198260	1198421	1198829	1198910	4,31,65	0,0,0	28,39,3	1,8,3	190	149	1.54997e-05	0.00109986	1.0,1.0,1.0	0.956,0.793,0.44	0.27	up	chr7.1	1196462	1199608	-	--	--	K09060 plant G-box-binding factor | (GenBank) bZIP transcription factor family protein (A)	--	AEW66884.1	CPRF1_PETCR RecName: Full=Common plant regulatory factor 1; Short=CPRF-1;	At2g46270	GO:0005634,nucleus; GO:0003677,DNA binding; GO:0003700,DNA-binding transcription factor activity; GO:0003674,molecular_function; GO:0003676,nucleic acid binding; GO:0005488,binding; GO:0097159,organic cyclic compound binding; GO:1901363,heterocyclic compound binding; GO:0140110,transcription regulator activity; GO:0005622,intracellular; GO:0005575,cellular_component; GO:0005623,cell; GO:0043231,i…	PF07777.11:G-box binding protein MFMR	bZIP	TF	bZIP
MS.gene39417	21858402	21858493	21858021	21858069	21859406	21859864	5,23,2	5,0,2	11,12,16	0,0,0	239	149	0.000139642	0.00663549	0.384,1.0,0.384	1.0,1.0,1.0	-0.411	down	chr4.2	21853884	21859864	-	--	--	K03217 YidC/Oxa1 family membrane protein insertase | (GenBank) 60 kDa inner membrane protein (A)	ko03060: Protein export	XP_013457089.1	OXA1_ARATH RecName: Full=Mitochondrial inner membrane protein OXA1; AltName: Full=Oxidase assembly 1 protein; Short=AtOXA1; Flags: Precursor;	At5g62050	GO:0031305,integral component of mitochondrial inner membrane; GO:0005743,mitochondrial inner membrane; GO:0005739,mitochondrion; GO:0032977,membrane insertase activity; GO:0033617,mitochondrial respiratory chain complex IV assembly; GO:0051205,protein insertion into membrane; GO:0032979,protein insertion into mitochondrial inner membrane from matrix side; GO:0003674,molecular_function; GO:000521…	PF02096.20:60Kd inner membrane protein	--	--	--
MS.gene96656	45492222	45492352	45492050	45492080	45492598	45492745	70,13,88	4,2,8	60,29,48	0,0,0	278	149	3.36471e-06	0.00035814	0.904,0.777,0.855	1.0,1.0,1.0	-0.155	down	chr5.3	45491507	45495081	+	--	--	K18368 caffeoylshikimate esterase [EC:3.1.1.-] | (GenBank) alpha/beta-hydrolase superfamily protein (A)	ko00940: Phenylpropanoid biosynthesis; ko01100: Metabolic pathways; ko01110: Biosynthesis of secondary metabolites	XP_003614638.1	CSE_ARATH RecName: Full=Caffeoylshikimate esterase; EC=3.1.1.-; AltName: Full=Lysophospholipase 2; Short=LysoPL2;	At1g77420	GO:0005783,endoplasmic reticulum; GO:0005794,Golgi apparatus; GO:0016020,membrane; GO:0005634,nucleus; GO:0005886,plasma membrane; GO:0009506,plasmodesma; GO:0003846,2-acylglycerol O-acyltransferase activity; GO:0090430,caffeoyl-CoA: alcohol caffeoyl transferase activity; GO:0016787,hydrolase activity; GO:0016298,lipase activity; GO:0004622,lysophospholipase activity; GO:0009809,lignin biosynthet…	PF12146.8:Serine aminopeptidase, S33	--	--	--
MS.gene037325	80200925	80201019	80198845	80200309	80201192	80201398	5,23,52	0,12,12	5,6,2	0,0,0	242	149	1.65687e-06	0.000191693	1.0,0.541,0.727	1.0,1.0,1.0	-0.244	down	chr1.1	80198846	80201661	-	--	--	K14515 EIN3-binding F-box protein | (RefSeq) hypothetical protein (A)	ko04016: MAPK signaling pathway - plant; ko04075: Plant hormone signal transduction	XP_003592693.1	FBL10_ARATH RecName: Full=F-box/LRR-repeat protein 10;	At2g17020	GO:0019005,SCF ubiquitin ligase complex; GO:0031146,SCF-dependent proteasomal ubiquitin-dependent protein catabolic process; GO:0019941,modification-dependent protein catabolic process; GO:0008152,metabolic process; GO:0006508,proteolysis; GO:0051603,proteolysis involved in cellular protein catabolic process; GO:0006511,ubiquitin-dependent protein catabolic process; GO:0006807,nitrogen compound m…	PF13516.6:Leucine Rich repeat	--	--	--
MS.gene016842	74169533	74169572	74169358	74169415	74169670	74169775	35,56,25	1,9,0	30,11,36	0,0,0	187	149	0.000251682	0.010071	0.965,0.832,1.0	1.0,1.0,1.0	-0.068	down	chr5.2	74167316	74170831	+	--	--	K06961 ribosomal RNA assembly protein | (GenBank) KRR1 small subunit processome component (A)	--	XP_003617063.1	--	At5g08420	GO:0005730,nucleolus; GO:0003723,RNA binding; GO:0006364,rRNA processing; GO:0003674,molecular_function; GO:0003676,nucleic acid binding; GO:0005488,binding; GO:0097159,organic cyclic compound binding; GO:1901363,heterocyclic compound binding; GO:0042254,ribosome biogenesis; GO:0008152,metabolic process; GO:0006139,nucleobase-containing compound metabolic process; GO:0006396,RNA processing; GO:00…	PF17903.1:Krr1 KH1 domain	--	--	--
MS.gene043157	71561510	71561630	71561239	71561315	71561752	71562002	22,35,28	6,2,2	19,10,7	0,0,0	268	149	2.30293e-05	0.00151311	0.671,0.907,0.886	1.0,1.0,1.0	-0.179	down	chr4.2	71557599	71564597	-	--	--	K15865 threonylcarbamoyladenosine tRNA methylthiotransferase CDKAL1 [EC:2.8.4.5] | (GenBank) dimethylallyl, adenosine tRNA methylthiotransferase (A)	--	XP_013455261.1	CK5P1_ARATH RecName: Full=CDK5RAP1-like protein;	At1g72090	GO:0005829,cytosol; GO:0005739,mitochondrion; GO:0051539,4 iron, 4 sulfur cluster binding; GO:0046872,metal ion binding; GO:0035597,N6-isopentenyladenosine methylthiotransferase activity; GO:0045736,negative regulation of cyclin-dependent protein serine/threonine kinase activity; GO:0000079,regulation of cyclin-dependent protein serine/threonine kinase activity; GO:0003674,molecular_function; GO:…	PF04055.21:Radical SAM superfamily	--	--	--
MS.gene056778	66282748	66282861	66282111	66282156	66283305	66283393	109,101,113	13,0,4	10,31,53	0,1,0	261	149	0.00051983	0.0184436	0.827,1.0,0.942	1.0,0.947,1.0	-0.059	down	chr8.4	66278139	66286808	-	--	--	K01068 acyl-coenzyme A thioesterase 1/2/4 [EC:3.1.2.2] | (GenBank) acyl-CoA thioesterase (A)	ko00062: Fatty acid elongation; ko01040: Biosynthesis of unsaturated fatty acids; ko01100: Metabolic pathways; ko01110: Biosynthesis of secondary metabolites	XP_013444837.1	--	At4g00520	GO:0005829,cytosol; GO:0047617,acyl-CoA hydrolase activity; GO:0006637,acyl-CoA metabolic process; GO:0009062,fatty acid catabolic process; GO:0003674,molecular_function; GO:0003824,catalytic activity; GO:0016289,CoA hydrolase activity; GO:0016787,hydrolase activity; GO:0016788,hydrolase activity, acting on ester bonds; GO:0016790,thiolester hydrolase activity; GO:0006790,sulfur compound metaboli…	PF13622.6:Thioesterase-like superfamily	--	--	--
MS.gene056778	66284538	66284585	66284287	66284413	66285170	66285252	66,69,60	7,7,6	34,58,49	1,1,0	195	149	1.08451e-05	0.000812927	0.878,0.883,0.884	0.963,0.978,1.0	-0.099	down	chr8.4	66278139	66286808	-	--	--	K01068 acyl-coenzyme A thioesterase 1/2/4 [EC:3.1.2.2] | (GenBank) acyl-CoA thioesterase (A)	ko00062: Fatty acid elongation; ko01040: Biosynthesis of unsaturated fatty acids; ko01100: Metabolic pathways; ko01110: Biosynthesis of secondary metabolites	XP_013444837.1	--	At4g00520	GO:0005829,cytosol; GO:0047617,acyl-CoA hydrolase activity; GO:0006637,acyl-CoA metabolic process; GO:0009062,fatty acid catabolic process; GO:0003674,molecular_function; GO:0003824,catalytic activity; GO:0016289,CoA hydrolase activity; GO:0016787,hydrolase activity; GO:0016788,hydrolase activity, acting on ester bonds; GO:0016790,thiolester hydrolase activity; GO:0006790,sulfur compound metaboli…	PF13622.6:Thioesterase-like superfamily	--	--	--
MS.gene59400	12731127	12731193	12730318	12730384	12731708	12731829	102,135,111	9,13,15	75,63,87	0,0,4	214	149	1.08835e-06	0.000141273	0.888,0.878,0.837	1.0,1.0,0.938	-0.112	down	chr5.4	12729397	12732522	+	--	--	K01507 inorganic pyrophosphatase [EC:3.6.1.1] | (GenBank) soluble inorganic pyrophosphatase (A)	ko00190: Oxidative phosphorylation	XP_003612058.1	IPYR_SOLTU RecName: Full=Soluble inorganic pyrophosphatase PPA1 {ECO:0000303|PubMed:10092174}; EC=3.6.1.1 {ECO:0000269|PubMed:8552717}; AltName: Full=Pyrophosphate phospho-hydrolase {ECO:0000303|PubMed:8552717}; Short=PPase {ECO:0000303|PubMed:8552717};	At1g01050	GO:0005829,cytosol; GO:0004427,inorganic diphosphatase activity; GO:0000287,magnesium ion binding; GO:0071344,diphosphate metabolic process; GO:0006796,phosphate-containing compound metabolic process; GO:0003674,molecular_function; GO:0003824,catalytic activity; GO:0016462,pyrophosphatase activity; GO:0016787,hydrolase activity; GO:0016817,hydrolase activity, acting on acid anhydrides; GO:0016818…	PF00719.19:Inorganic pyrophosphatase	--	--	--
MS.gene030979	5444044	5444126	5443499	5443570	5444846	5445002	17,26,10	7,0,2	9,23,11	0,0,0	230	149	2.55127e-05	0.00163589	0.611,1.0,0.764	1.0,1.0,1.0	-0.208	down	chr6.2	5435860	5462918	+	--	--	K13024 inositol-hexakisphosphate/diphosphoinositol-pentakisphosphate 1-kinase [EC:2.7.4.24] | (GenBank) phosphoglycerate mutase-like protein (A)	ko04070: Phosphatidylinositol signaling system	XP_013450919.1	VIP2L_ARATH RecName: Full=Inositol hexakisphosphate and diphosphoinositol-pentakisphosphate kinase VIP2 {ECO:0000303|PubMed:25231822}; EC=2.7.4.21 {ECO:0000269|PubMed:25231822}; EC=2.7.4.24 {ECO:0000269|PubMed:25231822}; AltName: Full=Protein VIP HOMOLOG 1 {ECO:0000303|PubMed:25901085}; AltName: Full=VIP1 homolog protein 2 {ECO:0000303|PubMed:25231822}; Short=Arabidopsis homolog protein of yeast …	At3g01310	GO:0005829,cytosol; GO:0005886,plasma membrane; GO:0009536,plastid; GO:0102092,5-diphosphoinositol pentakisphosphate 3-kinase activity; GO:0005524,ATP binding; GO:0033857,diphosphoinositol-pentakisphosphate kinase activity; GO:0000829,inositol heptakisphosphate kinase activity; GO:0052723,inositol hexakisphosphate 1-kinase activity; GO:0052724,inositol hexakisphosphate 3-kinase activity; GO:00008…	PF00328.22:Histidine phosphatase superfamily (branch 2)	--	--	--
MS.gene70310	9413789	9413824	9413487	9413596	9414395	9414446	97,35,44	29,1,6	2,1,131	0,1,0	183	149	0.000121846	0.00609535	0.731,0.966,0.857	1.0,0.449,1.0	0.035	up	chr4.1	9412870	9417437	-	--	--	K22763 deubiquitinase DESI2 [EC:3.4.19.12] | (Kazusa) Lj2g3v1989220.3; - (A)	--	XP_013446850.1	NUDT2_ARATH RecName: Full=Nudix hydrolase 2; Short=AtNUDT2; EC=3.6.1.-; AltName: Full=ADP-ribose pyrophosphatase; EC=3.6.1.13; AltName: Full=NADH pyrophosphatase; EC=3.6.1.22;	At5g47650	GO:0005829,cytosol; GO:0047631,ADP-ribose diphosphatase activity; GO:0046872,metal ion binding; GO:0051287,NAD binding; GO:0000210,NAD+ diphosphatase activity; GO:0035529,NADH pyrophosphatase activity; GO:0006979,response to oxidative stress; GO:0003674,molecular_function; GO:0003824,catalytic activity; GO:0016462,pyrophosphatase activity; GO:0016787,hydrolase activity; GO:0016817,hydrolase activ…	PF00293.28:NUDIX domain	--	--	--
MS.gene72695	16175848	16176004	16175312	16175399	16176097	16176204	126,92,253	0,0,16	144,314,261	0,0,0	298	149	1.70103e-05	0.0011757	1.0,1.0,0.888	1.0,1.0,1.0	-0.037	down	chr5.4	16173696	16178154	-	--	--	K22848 diacylglycerol O-acyltransferase 2, plant [EC:2.3.1.20] | (GenBank) type 2 acyl-CoA diacylglycerol acyltransferase (A)	ko00561: Glycerolipid metabolism; ko01100: Metabolic pathways	XP_003612436.1	DAT2D_SOYBN RecName: Full=Diacylglycerol O-acyltransferase 2D {ECO:0000305}; Short=GmDGAT2D {ECO:0000303|PubMed:27345221}; EC=2.3.1.20 {ECO:0000269|PubMed:27345221};	At3g51520	GO:0005789,endoplasmic reticulum membrane; GO:0016021,integral component of membrane; GO:0005811,lipid droplet; GO:0004144,diacylglycerol O-acyltransferase activity; GO:0008374,O-acyltransferase activity; GO:0006071,glycerol metabolic process; GO:0006629,lipid metabolic process; GO:0019432,triglyceride biosynthetic process; GO:0003674,molecular_function; GO:0003824,catalytic activity; GO:0016411,…	PF03982.13:Diacylglycerol acyltransferase	--	--	--
MS.gene72695	16176097	16176204	16175312	16175399	16177616	16177702	38,23,116	6,33,47	23,69,39	0,0,0	255	149	1.00797e-12	7.66346e-10	0.787,0.289,0.591	1.0,1.0,1.0	-0.444	down	chr5.4	16173696	16178154	-	--	--	K22848 diacylglycerol O-acyltransferase 2, plant [EC:2.3.1.20] | (GenBank) type 2 acyl-CoA diacylglycerol acyltransferase (A)	ko00561: Glycerolipid metabolism; ko01100: Metabolic pathways	XP_003612436.1	DAT2D_SOYBN RecName: Full=Diacylglycerol O-acyltransferase 2D {ECO:0000305}; Short=GmDGAT2D {ECO:0000303|PubMed:27345221}; EC=2.3.1.20 {ECO:0000269|PubMed:27345221};	At3g51520	GO:0005789,endoplasmic reticulum membrane; GO:0016021,integral component of membrane; GO:0005811,lipid droplet; GO:0004144,diacylglycerol O-acyltransferase activity; GO:0008374,O-acyltransferase activity; GO:0006071,glycerol metabolic process; GO:0006629,lipid metabolic process; GO:0019432,triglyceride biosynthetic process; GO:0003674,molecular_function; GO:0003824,catalytic activity; GO:0016411,…	PF03982.13:Diacylglycerol acyltransferase	--	--	--
MS.gene07269	69583007	69583078	69582503	69582561	69583441	69583943	24,14,40	5,8,5	9,13,11	0,0,0	219	149	4.2529e-07	6.11728e-05	0.766,0.544,0.845	1.0,1.0,1.0	-0.282	down	chr1.4	69581072	69583943	+	--	--	K08819 cyclin-dependent kinase 12/13 [EC:2.7.11.22 2.7.11.23] | (GenBank) Cdc2 kinase, putative (A)	--	XP_003591426.2	CDKC2_ORYSJ RecName: Full=Cyclin-dependent kinase C-2; Short=CDKC;2; EC=2.7.11.22; EC=2.7.11.23;	At5g64960	GO:0000307,cyclin-dependent protein kinase holoenzyme complex; GO:0005634,nucleus; GO:0005524,ATP binding; GO:0004693,cyclin-dependent protein serine/threonine kinase activity; GO:0106310,NA; GO:0106311,NA; GO:0008353,RNA polymerase II CTD heptapeptide repeat kinase activity; GO:0070816,phosphorylation of RNA polymerase II C-terminal domain; GO:0032968,positive regulation of transcription elongat…	--	--	--	--
MS.gene034454	12501601	12501767	12500892	12501161	12502339	12502559	1081,101,274	0,4,0	115,93,176	7,0,4	298	149	0.0016638	0.0473515	1.0,0.927,1.0	0.891,1.0,0.957	0.026	up	chr2.3	12500893	12502984	-	--	--	K02865 large subunit ribosomal protein L10Ae | (GenBank) ribosomal protein L1p/L10e family protein (A)	ko03010: Ribosome	XP_003596822.1	R10A1_ARATH RecName: Full=60S ribosomal protein L10a-1;	At2g27530	GO:0005829,cytosol; GO:0022625,cytosolic large ribosomal subunit; GO:0022626,cytosolic ribosome; GO:0005576,extracellular region; GO:0005886,plasma membrane; GO:0009506,plasmodesma; GO:0042788,polysomal ribosome; GO:0003723,RNA binding; GO:0003735,structural constituent of ribosome; GO:0000470,maturation of LSU-rRNA; GO:0006412,translation; GO:0003674,molecular_function; GO:0003676,nucleic acid b…	PF00687.21:Ribosomal protein L1p/L10e family	--	--	--
MS.gene96566	46273244	46273561	46272028	46272450	46274168	46274266	301,547,829	0,14,19	239,392,224	0,0,0	298	149	1.05331e-05	0.000812927	1.0,0.951,0.956	1.0,1.0,1.0	-0.031	down	chr7.3	46272029	46274380	-	--	--	K22762 desumoylating isopeptidase 1 [EC:3.4.-.-] | (GenBank) PPPDE thiol peptidase family protein, putative (A)	--	XP_003622933.1	PPDEX_ARATH RecName: Full=DeSI-like protein At4g17486; EC=3.4.-.-;	At3g07090	GO:0101005,ubiquitinyl hydrolase activity; GO:0016579,protein deubiquitination; GO:0070646,protein modification by small protein removal; GO:0003674,molecular_function; GO:0003824,catalytic activity; GO:0016787,hydrolase activity; GO:0140096,catalytic activity, acting on a protein; GO:0008152,metabolic process; GO:0006464,cellular protein modification process; GO:0006508,proteolysis; GO:0006807,n…	PF05903.14:PPPDE putative peptidase domain	--	--	--
MS.gene073577	34068545	34068571	34067631	34068095	34068888	34068919	6,17,13	1,5,6	30,29,7	0,0,0	174	149	5.99467e-08	9.96988e-06	0.837,0.744,0.65	1.0,1.0,1.0	-0.256	down	chr1.1	34067632	34069363	+	--	--	K09284 AP2-like factor, euAP2 lineage | (GenBank) AP2 domain transcription factor (A)	--	XP_013467316.1	RAP27_ARATH RecName: Full=Ethylene-responsive transcription factor RAP2-7; AltName: Full=Protein RELATED TO APETALA2 7; AltName: Full=Protein TARGET OF EAT 1;	At2g28550	GO:0005634,nucleus; GO:0003677,DNA binding; GO:0003700,DNA-binding transcription factor activity; GO:0009873,ethylene-activated signaling pathway; GO:0003674,molecular_function; GO:0003676,nucleic acid binding; GO:0005488,binding; GO:0097159,organic cyclic compound binding; GO:1901363,heterocyclic compound binding; GO:0140110,transcription regulator activity; GO:0000160,phosphorelay signal transd…	PF00847.20:AP2 domain	AP2/ERF-ERF	TF	AP2/ERF->AP2/ERF-ERF
MS.gene033255	20824874	20824952	20824514	20824645	20825193	20825449	68,114,162	0,5,16	46,2,60	0,0,0	226	149	3.36495e-05	0.00208236	1.0,0.938,0.87	1.0,1.0,1.0	-0.064	down	chr8.4	20824515	20827069	-	--	--	--	--	XP_013457794.1	--	At5g63000	GO:0016021,integral component of membrane; GO:0005739,mitochondrion; GO:0005575,cellular_component; GO:0016020,membrane; GO:0031224,intrinsic component of membrane; GO:0044425,membrane part; GO:0005622,intracellular; GO:0005623,cell; GO:0005737,cytoplasm; GO:0043231,intracellular membrane-bounded organelle; GO:0043226,organelle; GO:0043227,membrane-bounded organelle; GO:0043229,intracellular orga…	PF02466.19:Tim17/Tim22/Tim23/Pmp24 family	--	--	--
MS.gene91767	49664461	49664527	49664178	49664283	49665169	49665222	49,11,21	0,3,12	1,9,10	0,0,0	214	149	1.60831e-05	0.00112624	1.0,0.719,0.549	1.0,1.0,1.0	-0.244	down	chr2.1	49663600	49666170	-	--	--	--	--	XP_013463544.1	--	--	GO:0008080,N-acetyltransferase activity; GO:0003674,molecular_function; GO:0003824,catalytic activity; GO:0016407,acetyltransferase activity; GO:0016410,N-acyltransferase activity; GO:0016740,transferase activity; GO:0016746,transferase activity, transferring acyl groups; GO:0016747,transferase activity, transferring acyl groups other than amino-acyl groups	PF00583.25:Acetyltransferase (GNAT) family	GNAT	TR	GNAT
MS.gene064666	96982405	96982463	96982272	96982326	96982662	96982739	56,17,15	2,3,4	32,43,80	0,0,0	206	149	8.01218e-05	0.00430715	0.953,0.804,0.731	1.0,1.0,1.0	-0.171	down	chr3.4	96978496	96984007	+	--	--	K01081 5'-nucleotidase [EC:3.1.3.5] | (RefSeq) HAD-superfamily hydrolase, subfamily IG,5'-nucleotidase (A)	ko00230: Purine metabolism; ko00240: Pyrimidine metabolism; ko00760: Nicotinate and nicotinamide metabolism; ko01100: Metabolic pathways; ko01110: Biosynthesis of secondary metabolites	XP_013462121.1	--	At1g75210	GO:0008253,5'-nucleotidase activity; GO:0046872,metal ion binding; GO:0003674,molecular_function; GO:0003824,catalytic activity; GO:0008252,nucleotidase activity; GO:0016787,hydrolase activity; GO:0016788,hydrolase activity, acting on ester bonds; GO:0016791,phosphatase activity; GO:0042578,phosphoric ester hydrolase activity; GO:0005488,binding; GO:0043167,ion binding; GO:0043169,cation binding	PF05761.14:5' nucleotidase family	--	--	--
MS.gene54701	3952910	3953331	3952106	3952139	3953755	3953940	10,25,18	4,6,5	59,56,67	0,0,3	298	149	9.5756e-09	2.31643e-06	0.556,0.676,0.643	1.0,1.0,0.918	-0.348	down	chr6.1	3951850	3953940	+	--	--	K03860 phosphatidylinositol N-acetylglucosaminyltransferase subunit Q | (RefSeq) N-acetylglucosaminyl-phosphatidylinositol biosynthetic protein gpi1-like (A)	ko00563: Glycosylphosphatidylinositol (GPI)-anchor biosynthesis; ko01100: Metabolic pathways	XP_013450870.1	GASAE_ARATH RecName: Full=Gibberellin-regulated protein 14; AltName: Full=GAST1 protein homolog 14; Flags: Precursor;	At5g14920	GO:0005576,extracellular region; GO:0005886,plasma membrane; GO:0009536,plastid; GO:0009740,gibberellic acid mediated signaling pathway; GO:2000377,regulation of reactive oxygen species metabolic process; GO:0009737,response to abscisic acid; GO:0009739,response to gibberellin; GO:0009651,response to salt stress; GO:0001101,response to acid chemical; GO:0007165,signal transduction; GO:0007154,cel…	PF02704.14:Gibberellin regulated protein	--	--	--
MS.gene002657	68710054	68710161	68709800	68709886	68710281	68710344	135,33,75	6,0,5	68,93,80	1,0,0	255	149	0.000767946	0.0258671	0.929,1.0,0.898	0.975,1.0,1.0	-0.049	down	chr2.1	68707492	68713652	-	--	--	K06272 integrin-linked kinase [EC:2.7.11.1] | (RefSeq) integrin-linked protein kinase 1 (A)	--	XP_013462623.1	ILK1_ARATH RecName: Full=Integrin-linked protein kinase 1 {ECO:0000303|PubMed:27208244}; EC=2.7.11.1 {ECO:0000269|PubMed:27208244}; AltName: Full=Ankyrin protein kinase 1 {ECO:0000303|PubMed:12650621};	At4g18950	GO:0009898,cytoplasmic side of plasma membrane; GO:0005783,endoplasmic reticulum; GO:0005789,endoplasmic reticulum membrane; GO:0005524,ATP binding; GO:0004672,protein kinase activity; GO:0106310,NA; GO:0004674,protein serine/threonine kinase activity; GO:0004712,protein serine/threonine/tyrosine kinase activity; GO:0106311,NA; GO:0045087,innate immune response; GO:0046777,protein autophosphoryla…	PF07714.17:Protein tyrosine kinase	--	--	--
MS.gene037375	77693913	77693967	77693441	77693716	77694063	77694199	76,45,183	9,5,0	13,53,19	0,0,0	202	149	0.000564539	0.0195096	0.862,0.869,1.0	1.0,1.0,1.0	-0.09	down	chr1.3	77693166	77694199	-	--	--	--	--	GAU18093.1	GEML4_ARATH RecName: Full=GEM-like protein 4;	At5g08350	--	PF02893.20:GRAM domain	--	--	--
MS.gene037977	48081421	48081532	48081203	48081272	48083503	48083588	41,6,4	3,6,0	1,5,31	0,0,0	259	149	0.000122548	0.00609535	0.887,0.365,1.0	1.0,1.0,1.0	-0.249	down	chr1.3	48076741	48085979	-	--	--	K08343 ubiquitin-like-conjugating enzyme ATG3 | (RefSeq) autophagy-related protein 3 (A)	ko04136: Autophagy - other	XP_013468340.1	IDM1_ARATH RecName: Full=Increased DNA methylation 1 {ECO:0000303|PubMed:22700931}; AltName: Full=Histone H3 acetyltransferase IDM1 {ECO:0000305}; EC=2.3.1.- {ECO:0000255|PROSITE-ProRule:PRU00532}; AltName: Full=Protein ROS4 {ECO:0000303|PubMed:22733760}; AltName: Full=Repressor of silencing 4 {ECO:0000303|PubMed:22733760};	At2g37520	GO:0005634,nucleus; GO:0009506,plasmodesma; GO:0010385,double-stranded methylated DNA binding; GO:0004402,histone acetyltransferase activity; GO:0042393,histone binding; GO:0046872,metal ion binding; GO:0080188,RNA-directed DNA methylation; GO:0044154,histone H3-K14 acetylation; GO:0043971,histone H3-K18 acetylation; GO:0043972,histone H3-K23 acetylation; GO:0044030,regulation of DNA methylation;…	PF16135.5:TPL-binding domain in jasmonate signalling	PHD	TR	PHD
MS.gene005383	63136958	63137012	63136788	63136848	63137111	63137160	1,81,69	0,0,12	2,72,15	0,0,0	202	149	0.000185348	0.00827089	1.0,1.0,0.809	1.0,1.0,1.0	-0.064	down	chr1.1	63136011	63142178	+	--	--	K04799 flap endonuclease-1 [EC:3.-.-.-] | (GenBank) flap endonuclease 1-A (A)	ko03030: DNA replication; ko03410: Base excision repair; ko03450: Non-homologous end-joining	XP_003591270.1	FEN1_SOYBN RecName: Full=Flap endonuclease 1 {ECO:0000255|HAMAP-Rule:MF_03140}; Short=FEN-1 {ECO:0000255|HAMAP-Rule:MF_03140}; EC=3.1.-.- {ECO:0000255|HAMAP-Rule:MF_03140}; AltName: Full=Flap structure-specific endonuclease 1 {ECO:0000255|HAMAP-Rule:MF_03140};	At5g26675	GO:0005739,mitochondrion; GO:0005730,nucleolus; GO:0005654,nucleoplasm; GO:0008409,5'-3' exonuclease activity; GO:0017108,5'-flap endonuclease activity; GO:0003677,DNA binding; GO:0000287,magnesium ion binding; GO:0006284,base-excision repair; GO:0006260,DNA replication; GO:0043137,DNA replication, removal of RNA primer; GO:0003674,molecular_function; GO:0003824,catalytic activity; GO:0004518,nuc…	PF00867.18:XPG I-region	--	--	--
MS.gene053058	862889	862989	862202	862372	863112	863276	162,264,146	13,14,26	255,171,221	8,9,0	248	149	5.59929e-06	0.000532132	0.882,0.919,0.771	0.95,0.919,1.0	-0.099	down	chr6.2	860670	864343	-	--	--	K12741 heterogeneous nuclear ribonucleoprotein A1/A3 | (GenBank) RNA-binding (RRM/RBD/RNP motif) family protein (A)	ko03040: Spliceosome	XP_013450761.1	RNP1_ARATH RecName: Full=Heterogeneous nuclear ribonucleoprotein 1; Short=hnRNP1;	At5g40490	GO:0005829,cytosol; GO:0005634,nucleus; GO:0005681,spliceosomal complex; GO:0003729,mRNA binding; GO:0006397,mRNA processing; GO:0051028,mRNA transport; GO:1901000,regulation of response to salt stress; GO:2000070,regulation of response to water deprivation; GO:0008380,RNA splicing; GO:0010228,vegetative to reproductive phase transition of meristem; GO:0003674,molecular_function; GO:0003676,nucle…	PF00076.22:RNA recognition motif. (a.k.a. RRM, RBD, or RNP domain)	--	--	--
MS.gene90804	88066000	88066134	88064807	88064994	88068176	88068362	69,33,91	3,2,17	94,119,63	1,0,2	282	149	5.31543e-07	7.44439e-05	0.924,0.897,0.739	0.98,1.0,0.943	-0.121	down	chr1.4	88064605	88069878	-	--	--	K18624 macrophage erythroblast attacher | (GenBank) macrophage erythroblast attacher-like protein (A)	--	XP_013470495.1	MAEA_ARATH RecName: Full=Protein MAEA homolog {ECO:0000305};	At3g55070	GO:0005737,cytoplasm; GO:0005829,cytosol; GO:0034657,GID complex; GO:0005634,nucleus; GO:0046872,metal ion binding; GO:0061630,ubiquitin protein ligase activity; GO:0045721,negative regulation of gluconeogenesis; GO:0043161,proteasome-mediated ubiquitin-dependent protein catabolic process; GO:0003674,molecular_function; GO:0005488,binding; GO:0043167,ion binding; GO:0043169,cation binding; GO:000…	PF10607.9:CTLH/CRA C-terminal to LisH motif domain	--	--	--
MS.gene054117	14447117	14447177	14446514	14446586	14447264	14447361	101,71,84	0,0,0	32,91,71	0,1,12	208	149	4.38614e-05	0.00256517	1.0,1.0,1.0	1.0,0.985,0.809	0.069	up	chr1.3	14444705	14447931	+	--	--	K11462 polycomb protein EED | (GenBank) fertilization-independent endosperm protein (A)	--	XP_013466358.1	FIE2_ORYSJ RecName: Full=Polycomb group protein FIE1 {ECO:0000305}; AltName: Full=Protein FERTILIZATION-INDEPENDENT ENDOSPERM 2 {ECO:0000303|PubMed:19825651}; Short=OsFIE2 {ECO:0000303|PubMed:19825651}; AltName: Full=WD40 repeat-containing protein 153 {ECO:0000303|PubMed:22429805}; Short=OsWD40-153 {ECO:0000303|PubMed:22429805};	At3g20740	GO:0005677,chromatin silencing complex; GO:0035098,ESC/E(Z) complex; GO:0031519,PcG protein complex; GO:0030154,cell differentiation; GO:0006342,chromatin silencing; GO:0009960,endosperm development; GO:0070734,histone H3-K27 methylation; GO:0010231,maintenance of seed dormancy; GO:0000122,negative regulation of transcription by RNA polymerase II; GO:0090696,post-embryonic plant organ development…	PF00400.32:WD domain, G-beta repeat	--	--	--
MS.gene28830	5603796	5603802	5603286	5603585	5603947	5604422	6,0,10	3,4,0	0,0,0	1,4,2	154	149	1.14352e-06	0.000143963	0.659,0.0,1.0	0.0,0.0,0.0	0.553	up	chr7.4	5602117	5605862	-	--	--	--	--	AFK47258.1	--	At3g62330	GO:0003676,nucleic acid binding; GO:0008270,zinc ion binding; GO:0003674,molecular_function; GO:0005488,binding; GO:0097159,organic cyclic compound binding; GO:1901363,heterocyclic compound binding; GO:0046872,metal ion binding; GO:0043167,ion binding; GO:0043169,cation binding; GO:0046914,transition metal ion binding	PF12353.8:Eukaryotic translation initiation factor 3 subunit G	--	--	--
MS.gene024575	2296779	2296980	2296391	2296562	2297228	2297401	416,27,163	0,0,0	96,96,275	70,13,0	298	149	4.49241e-08	7.96954e-06	1.0,1.0,1.0	0.407,0.787,1.0	0.269	up	chr7.2	2296225	2299007	+	--	--	K01456 peptide-N4-(N-acetyl-beta-glucosaminyl)asparagine amidase [EC:3.5.1.52] | (RefSeq) peptide-N(4)-(N-acetyl-beta- glucosaminyl)asparagine amidase-like (A)	ko04141: Protein processing in endoplasmic reticulum	XP_003626441.2	AKR1_SOYBN RecName: Full=Probable aldo-keto reductase 1; Short=GmAKR1; EC=1.1.1.-;	At1g60690	GO:0047834,D-threo-aldose 1-dehydrogenase activity; GO:0003674,molecular_function; GO:0003824,catalytic activity; GO:0016491,oxidoreductase activity; GO:0016614,oxidoreductase activity, acting on CH-OH group of donors; GO:0016616,oxidoreductase activity, acting on the CH-OH group of donors, NAD or NADP as acceptor	PF00248.21:Aldo/keto reductase family	--	--	--
MS.gene01205	73602686	73602755	73601539	73601635	73605292	73605443	73,70,50	4,2,5	66,44,38	1,0,0	217	149	0.00083814	0.0275345	0.926,0.96,0.873	0.978,1.0,1.0	-0.073	down	chr2.4	73601046	73608376	-	--	--	K02355 elongation factor G | (RefSeq) elongation factor G-2, mitochondrial-like (A)	--	OIV89501.1	EFGM2_ARATH RecName: Full=Elongation factor G-2, mitochondrial; Short=EF-Gmt {ECO:0000255|HAMAP-Rule:MF_03061}; Short=mEF-G 1-2 {ECO:0000255|HAMAP-Rule:MF_03061}; AltName: Full=Elongation factor G1-2 {ECO:0000255|HAMAP-Rule:MF_03061};	At2g45030	GO:0005739,mitochondrion; GO:0005525,GTP binding; GO:0003924,GTPase activity; GO:0003746,translation elongation factor activity; GO:0070125,mitochondrial translational elongation; GO:0046686,response to cadmium ion; GO:0000166,nucleotide binding; GO:0001882,nucleoside binding; GO:0001883,purine nucleoside binding; GO:0003674,molecular_function; GO:0005488,binding; GO:0017076,purine nucleotide bin…	PF00009.27:Elongation factor Tu GTP binding domain	--	--	--
MS.gene61262	22930323	22930416	22930080	22930173	22930657	22930759	12,10,10	5,4,1	39,39,60	0,0,0	241	149	2.84996e-08	5.41696e-06	0.597,0.607,0.861	1.0,1.0,1.0	-0.312	down	chr8.2	22929096	22932227	-	--	--	K14498 serine/threonine-protein kinase SRK2 [EC:2.7.11.1] | (GenBank) sucrose nonfermenting 1(SNF1)-related kinase (A)	ko04016: MAPK signaling pathway - plant; ko04075: Plant hormone signal transduction	XP_013457576.1	SAPK3_ORYSI RecName: Full=Serine/threonine-protein kinase SAPK3; EC=2.7.11.1; AltName: Full=Osmotic stress/abscisic acid-activated protein kinase 3; AltName: Full=Protein kinase REK;	At4g33950	GO:0005737,cytoplasm; GO:0005634,nucleus; GO:0005524,ATP binding; GO:0106310,NA; GO:0106311,NA; GO:0009738,abscisic acid-activated signaling pathway; GO:0000166,nucleotide binding; GO:0003674,molecular_function; GO:0005488,binding; GO:0008144,drug binding; GO:0017076,purine nucleotide binding; GO:0030554,adenyl nucleotide binding; GO:0032553,ribonucleotide binding; GO:0032555,purine ribonucleotid…	PF00069.25:Protein kinase domain	--	--	--
MS.gene006807	24947369	24947705	24946048	24946454	24948727	24949152	5,10,3	0,0,0	8,11,11	3,0,3	298	149	0.00045966	0.0164182	1.0,1.0,1.0	0.571,1.0,0.647	0.261	up	chr4.1	24946049	24949152	-	--	--	K17782 mitochondrial intermembrane space import and assembly protein 40 | (RefSeq) uncharacterized protein LOC103836086 (A)	--	XP_013456758.1	--	At1g14050	--	PF07802.11:GCK domain	--	--	--
MS.gene041043	8960847	8960961	8958396	8958480	8961411	8961474	6,5,7	0,5,3	7,11,5	0,0,0	262	149	6.49848e-06	0.000579405	1.0,0.363,0.57	1.0,1.0,1.0	-0.356	down	chr5.1	8958251	8961474	+	--	--	K10577 ubiquitin-conjugating enzyme E2 I | (GenBank) ubiquitin-conjugating enzyme (A)	ko03013: RNA transport; ko04120: Ubiquitin mediated proteolysis	XP_003611678.1	SCE1_ARATH RecName: Full=SUMO-conjugating enzyme SCE1; EC=2.3.2.-; AltName: Full=Protein EMBRYO DEFECTIVE 1637; AltName: Full=Protein hus5 homolog; AltName: Full=SUMO-conjugating enzyme 1; Short=AtSCE1;	At3g57870	GO:0005829,cytosol; GO:0005634,nucleus; GO:0005524,ATP binding; GO:0019900,kinase binding; GO:0061656,SUMO conjugating enzyme activity; GO:0019789,SUMO transferase activity; GO:0009793,embryo development ending in seed dormancy; GO:0016925,protein sumoylation; GO:0009737,response to abscisic acid; GO:0000166,nucleotide binding; GO:0003674,molecular_function; GO:0005488,binding; GO:0008144,drug bi…	PF00179.26:Ubiquitin-conjugating enzyme	--	--	--
MS.gene73453	83497002	83497089	83496373	83496918	83497227	83497284	28,12,33	0,0,11	5,17,13	0,0,0	235	149	0.000186491	0.00827089	1.0,1.0,0.655	1.0,1.0,1.0	-0.115	down	chr1.4	83496048	83498555	+	--	--	K03327 multidrug resistance protein, MATE family | (GenBank) MATE efflux family protein (A)	--	XP_003592601.2	DTX14_ARATH RecName: Full=Protein DETOXIFICATION 14 {ECO:0000303|PubMed:11739388}; Short=AtDTX14 {ECO:0000303|PubMed:11739388}; AltName: Full=Multidrug and toxic compound extrusion protein 14 {ECO:0000305}; Short=MATE protein 14 {ECO:0000305};	At1g71140	GO:0016021,integral component of membrane; GO:0016020,membrane; GO:0005774,vacuolar membrane; GO:0015297,antiporter activity; GO:0022857,transmembrane transporter activity; GO:0042910,xenobiotic transmembrane transporter activity; GO:0042908,xenobiotic transport; GO:0003674,molecular_function; GO:0005215,transporter activity; GO:0015291,secondary active transmembrane transporter activity; GO:0022…	PF01554.18:MatE	--	--	--
MS.gene063020	35023717	35023964	35023464	35023622	35024897	35025047	56,8,6	0,0,0	68,30,40	3,5,0	298	149	0.00128028	0.0384952	1.0,1.0,1.0	0.919,0.75,1.0	0.11	up	chr4.2	35023465	35025259	+	--	--	K13412 calcium-dependent protein kinase [EC:2.7.11.1] | (RefSeq) hypothetical protein (A)	ko04626: Plant-pathogen interaction	AFK33457.1	--	At4g27580	GO:0016020,membrane; GO:0005575,cellular_component	PF01145.25:SPFH domain / Band 7 family	--	--	--
MS.gene79025	2917746	2917943	2917287	2917409	2918043	2918218	22,36,26	1,9,0	8,8,5	1,0,0	298	149	0.000846558	0.0276404	0.917,0.667,1.0	0.8,1.0,1.0	-0.072	down	chr6.2	2915403	2918955	+	--	--	K01968 3-methylcrotonyl-CoA carboxylase alpha subunit [EC:6.4.1.4] | (RefSeq) methylcrotonoyl-CoA carboxylase subunit alpha, mitochondrial (A)	ko00280: Valine, leucine and isoleucine degradation; ko01100: Metabolic pathways	XP_013450813.1	STY13_ARATH RecName: Full=Serine/threonine-protein kinase STY13 {ECO:0000305}; EC=2.7.11.1 {ECO:0000269|PubMed:16429265}; AltName: Full=AtSTYPK {ECO:0000303|PubMed:17291444}; AltName: Full=Serine/threonine/tyrosine-protein kinase 13 {ECO:0000303|PubMed:16429265};	At3g01490	GO:0005737,cytoplasm; GO:0005886,plasma membrane; GO:0005524,ATP binding; GO:0004672,protein kinase activity; GO:0106310,NA; GO:0004674,protein serine/threonine kinase activity; GO:0004712,protein serine/threonine/tyrosine kinase activity; GO:0106311,NA; GO:0004713,protein tyrosine kinase activity; GO:0006468,protein phosphorylation; GO:0045995,regulation of embryonic development; GO:0010344,seed…	PF07714.17:Protein tyrosine kinase	--	--	--
MS.gene072278	75206052	75206265	75204395	75204772	75206518	75206696	68,73,39	0,1,11	65,149,193	0,0,0	298	149	7.125e-05	0.0039092	1.0,0.973,0.639	1.0,1.0,1.0	-0.129	down	chr8.3	75204396	75206696	+	--	--	K20728 vegetative storage protein 2 | (RefSeq) vegetative storage protein 2-like (A)	ko04016: MAPK signaling pathway - plant	XP_013444177.1	PPA1_SOLLC RecName: Full=Acid phosphatase 1; EC=3.1.3.2; AltName: Full=Apase-1(1); Flags: Precursor;	At2g38600	GO:0003993,acid phosphatase activity; GO:0003674,molecular_function; GO:0003824,catalytic activity; GO:0016787,hydrolase activity; GO:0016788,hydrolase activity, acting on ester bonds; GO:0016791,phosphatase activity; GO:0042578,phosphoric ester hydrolase activity	PF03767.14:HAD superfamily, subfamily IIIB (Acid phosphatase)	--	--	--
MS.gene037286	79848317	79848386	79846595	79847128	79848529	79848676	19,54,35	0,0,10	2,8,1	0,0,0	217	149	0.000722201	0.0244812	1.0,1.0,0.706	1.0,1.0,1.0	-0.098	down	chr1.1	79846596	79848883	-	--	--	K09838 zeaxanthin epoxidase [EC:1.14.15.21] | (RefSeq) zeaxanthin epoxidase, chloroplastic (A)	ko00906: Carotenoid biosynthesis; ko01100: Metabolic pathways; ko01110: Biosynthesis of secondary metabolites	XP_013470337.1	MO2_ARATH RecName: Full=Monooxygenase 2 {ECO:0000303|PubMed:10216258}; Short=AtMO2 {ECO:0000303|PubMed:10216258}; EC=1.14.13.-;	At4g38540	GO:0005886,plasma membrane; GO:0071949,FAD binding; GO:0004497,monooxygenase activity; GO:0002239,response to oomycetes; GO:0000166,nucleotide binding; GO:0003674,molecular_function; GO:0005488,binding; GO:0036094,small molecule binding; GO:0043167,ion binding; GO:0043168,anion binding; GO:0048037,cofactor binding; GO:0050660,flavin adenine dinucleotide binding; GO:0050662,coenzyme binding; GO:00…	PF01494.19:FAD binding domain	--	--	--
MS.gene060194	20692021	20692087	20691347	20691455	20693209	20693815	23,1,10	5,2,3	23,7,12	0,0,0	214	149	1.79161e-06	0.000202871	0.762,0.258,0.699	1.0,1.0,1.0	-0.427	down	chr2.3	20691211	20695507	+	--	--	--	--	XP_013464570.1	--	At1g78810	--	--	--	--	--
MS.gene58462	18997413	18997439	18996164	18996254	18997593	18997727	19,40,22	6,0,2	18,9,10	0,0,0	174	149	0.00135454	0.040495	0.731,1.0,0.904	1.0,1.0,1.0	-0.122	down	chr8.4	18994434	18997727	-	--	--	K10573 ubiquitin-conjugating enzyme E2 A [EC:2.3.2.23] | (GenBank) ubiquitin-conjugating enzyme (A)	ko04120: Ubiquitin mediated proteolysis	XP_003609028.1	UBC2_MEDSA RecName: Full=Ubiquitin-conjugating enzyme E2 2; EC=2.3.2.23; AltName: Full=E2 ubiquitin-conjugating enzyme 2; AltName: Full=Ubiquitin carrier protein 2; AltName: Full=Ubiquitin-conjugating enzyme E2-17 kDa 2; AltName: Full=Ubiquitin-protein ligase 2;	At2g02760	GO:0005524,ATP binding; GO:0061631,ubiquitin conjugating enzyme activity; GO:0000166,nucleotide binding; GO:0003674,molecular_function; GO:0005488,binding; GO:0008144,drug binding; GO:0017076,purine nucleotide binding; GO:0030554,adenyl nucleotide binding; GO:0032553,ribonucleotide binding; GO:0032555,purine ribonucleotide binding; GO:0032559,adenyl ribonucleotide binding; GO:0035639,purine ribon…	PF00179.26:Ubiquitin-conjugating enzyme	--	--	--
MS.gene33646	15049119	15049165	15048496	15048611	15049596	15049667	8,0,18	9,4,4	2,10,7	1,1,1	194	149	0.00153623	0.0441937	0.406,0.0,0.776	0.606,0.885,0.843	-0.384	down	chr1.1	15044175	15049667	-	--	--	K00688 glycogen phosphorylase [EC:2.4.1.1] | (RefSeq) glycogen phosphorylase 1-like (A)	ko00500: Starch and sucrose metabolism; ko01100: Metabolic pathways; ko01110: Biosynthesis of secondary metabolites	XP_013466441.1	ACR3_ARATH RecName: Full=ACT domain-containing protein ACR3 {ECO:0000305}; AltName: Full=Protein ACT DOMAIN REPEATS 3 {ECO:0000303|PubMed:12481063};	At1g76990	GO:0005829,cytosol; GO:0016597,amino acid binding; GO:0003674,molecular_function; GO:0005488,binding; GO:0031406,carboxylic acid binding; GO:0036094,small molecule binding; GO:0043167,ion binding; GO:0043168,anion binding; GO:0043177,organic acid binding; GO:0005622,intracellular; GO:0005575,cellular_component; GO:0005623,cell; GO:0005737,cytoplasm; GO:0044424,intracellular part; GO:0044444,cytop…	PF01842.25:ACT domain	--	--	--
MS.gene51992	6103929	6104005	6103759	6103809	6104393	6104585	164,224,274	12,2,22	50,68,65	0,0,0	224	149	2.30659e-06	0.000255743	0.901,0.987,0.892	1.0,1.0,1.0	-0.073	down	chr3.3	6101676	6110495	+	--	--	K12818 ATP-dependent RNA helicase DHX8/PRP22 [EC:3.6.4.13] | (RefSeq) hypothetical protein (A)	ko03040: Spliceosome	XP_003598367.2	ZIF1_ARATH RecName: Full=Protein ZINC INDUCED FACILITATOR 1;	At3g43790	GO:0016021,integral component of membrane; GO:0009705,plant-type vacuole membrane; GO:0005886,plasma membrane; GO:0022821,potassium ion antiporter activity; GO:0090333,regulation of stomatal closure; GO:0009624,response to nematode; GO:0010043,response to zinc ion; GO:0055069,zinc ion homeostasis; GO:0003674,molecular_function; GO:0046873,metal ion transmembrane transporter activity; GO:0005215,t…	PF07690.16:Major Facilitator Superfamily	--	--	--
MS.gene51992	6104830	6104918	6104393	6104585	6105211	6105297	55,31,97	1,10,7	10,10,11	0,0,0	236	149	4.23644e-05	0.0025333	0.972,0.662,0.897	1.0,1.0,1.0	-0.156	down	chr3.3	6101676	6110495	+	--	--	K12818 ATP-dependent RNA helicase DHX8/PRP22 [EC:3.6.4.13] | (RefSeq) hypothetical protein (A)	ko03040: Spliceosome	XP_003598367.2	ZIF1_ARATH RecName: Full=Protein ZINC INDUCED FACILITATOR 1;	At3g43790	GO:0016021,integral component of membrane; GO:0009705,plant-type vacuole membrane; GO:0005886,plasma membrane; GO:0022821,potassium ion antiporter activity; GO:0090333,regulation of stomatal closure; GO:0009624,response to nematode; GO:0010043,response to zinc ion; GO:0055069,zinc ion homeostasis; GO:0003674,molecular_function; GO:0046873,metal ion transmembrane transporter activity; GO:0005215,t…	PF07690.16:Major Facilitator Superfamily	--	--	--
MS.gene51941	23483855	23483912	23483657	23483750	23486607	23486736	192,59,237	13,0,4	551,702,1440	3,17,5	205	149	0.00120395	0.0366138	0.915,1.0,0.977	0.993,0.968,0.995	-0.021	down	chr7.3	23479261	23495528	-	--	--	K14641 apyrase [EC:3.6.1.5] | (RefSeq) uncharacterized protein LOC114190025 (A)	ko00230: Purine metabolism; ko00240: Pyrimidine metabolism; ko01100: Metabolic pathways	AAF00611.1	NTPA_PEA RecName: Full=Nucleoside-triphosphatase; Short=NTPase; EC=3.6.1.15; AltName: Full=Nucleoside triphosphate phosphohydrolase; Short=Apyrase;	At5g18280	GO:0005634,nucleus; GO:0017111,nucleoside-triphosphatase activity; GO:0051028,mRNA transport; GO:0003674,molecular_function; GO:0003824,catalytic activity; GO:0016462,pyrophosphatase activity; GO:0016787,hydrolase activity; GO:0016817,hydrolase activity, acting on acid anhydrides; GO:0016818,hydrolase activity, acting on acid anhydrides, in phosphorus-containing anhydrides; GO:0006403,RNA localiz…	PF01150.17:GDA1/CD39 (nucleoside phosphatase) family	--	--	--
MS.gene32845	81982375	81982485	81981850	81981935	81982732	81983092	36,53,14	6,4,4	6,18,3	0,0,0	258	149	5.79766e-06	0.000541319	0.776,0.884,0.669	1.0,1.0,1.0	-0.224	down	chr3.1	81981306	81983092	-	--	--	K01595 phosphoenolpyruvate carboxylase [EC:4.1.1.31] | (GenBank) phosphoenolpyruvate carboxylase (A)	ko00620: Pyruvate metabolism; ko00710: Carbon fixation in photosynthetic organisms; ko01100: Metabolic pathways; ko01200: Carbon metabolism	GAU15580.1	CAPP1_SOYBN RecName: Full=Phosphoenolpyruvate carboxylase, housekeeping isozyme; Short=PEPCase; EC=4.1.1.31; AltName: Full=PEPC 1;	At1g53310	GO:0048046,apoplast; GO:0009507,chloroplast; GO:0005829,cytosol; GO:0008964,phosphoenolpyruvate carboxylase activity; GO:0015977,carbon fixation; GO:0048366,leaf development; GO:0015979,photosynthesis; GO:0006099,tricarboxylic acid cycle; GO:0003674,molecular_function; GO:0003824,catalytic activity; GO:0004611,phosphoenolpyruvate carboxykinase activity; GO:0016829,lyase activity; GO:0016830,carbo…	PF00311.17:Phosphoenolpyruvate carboxylase	--	--	--
MS.gene026450	18481306	18481431	18480084	18480164	18482124	18482305	8,17,19	0,12,2	9,47,37	0,3,0	273	149	0.00136725	0.040495	1.0,0.436,0.838	1.0,0.895,1.0	-0.207	down	chr1.1	18478647	18484596	+	--	--	K18999 RNA polymerase II C-terminal domain phosphatase-like 3/4 [EC:3.1.3.16] | (GenBank) carboxy-terminal domain phosphatase-like protein (A)	--	XP_013458303.1	CPL4_ARATH RecName: Full=RNA polymerase II C-terminal domain phosphatase-like 4; Short=FCP-like 4; EC=3.1.3.16; AltName: Full=Carboxyl-terminal phosphatase-like 4; Short=AtCPL4; Short=CTD phosphatase-like 4;	At5g58000_2	GO:0005634,nucleus; GO:0046872,metal ion binding; GO:0008022,protein C-terminus binding; GO:0106306,NA; GO:0106307,NA; GO:0003723,RNA binding; GO:0008420,RNA polymerase II CTD heptapeptide repeat phosphatase activity; GO:0070940,dephosphorylation of RNA polymerase II C-terminal domain; GO:0009651,response to salt stress; GO:0003674,molecular_function; GO:0005488,binding; GO:0043167,ion binding; G…	PF03031.18:NLI interacting factor-like phosphatase	--	--	--
MS.gene055948	15058334	15058486	15058069	15058245	15058759	15059298	0,1,0	6,1,2	4,2,1	0,0,3	298	149	1.51092e-05	0.00108664	0.0,0.333,0.0	1.0,1.0,0.143	-0.603	down	chr7.4	15055928	15059298	+	--	--	K15188 cyclin T | (GenBank) cyclin-T1-like protein (A)	--	XP_013449658.1	CCT14_ARATH RecName: Full=Cyclin-T1-4; Short=CycT1;4; AltName: Full=Protein AtCycT-like2;	At5g45190	GO:0008024,cyclin/CDK positive transcription elongation factor complex; GO:0005634,nucleus; GO:0061575,cyclin-dependent protein serine/threonine kinase activator activity; GO:0016538,cyclin-dependent protein serine/threonine kinase regulator activity; GO:0007049,cell cycle; GO:0051301,cell division; GO:0032786,positive regulation of DNA-templated transcription, elongation; GO:0006357,regulation o…	PF00134.23:Cyclin, N-terminal domain	--	--	--
MS.gene030395	6147151	6147245	6146610	6146679	6147407	6147497	36,47,69	0,13,8	20,30,40	0,0,0	242	149	9.69999e-07	0.000129058	1.0,0.69,0.842	1.0,1.0,1.0	-0.156	down	chr4.4	6143231	6149973	+	--	--	K01919 glutamate--cysteine ligase [EC:6.3.2.2] | (GenBank) glutamate-cysteine ligase B (A)	ko00270: Cysteine and methionine metabolism; ko00480: Glutathione metabolism; ko01100: Metabolic pathways; ko01240: Biosynthesis of cofactors	XP_003630512.1	GSH1_MEDTR RecName: Full=Glutamate--cysteine ligase, chloroplastic; EC=6.3.2.2; AltName: Full=Gamma-ECS; Short=GCS; AltName: Full=Gamma-glutamylcysteine synthetase; Flags: Precursor;	At4g23100	GO:0009507,chloroplast; GO:0005524,ATP binding; GO:0004357,glutamate-cysteine ligase activity; GO:0006750,glutathione biosynthetic process; GO:0000166,nucleotide binding; GO:0003674,molecular_function; GO:0005488,binding; GO:0008144,drug binding; GO:0017076,purine nucleotide binding; GO:0030554,adenyl nucleotide binding; GO:0032553,ribonucleotide binding; GO:0032555,purine ribonucleotide binding;…	PF04107.13:Glutamate-cysteine ligase family 2(GCS2)	--	--	--
MS.gene33799	23982841	23982949	23982245	23982527	23983191	23983493	23,8,35	0,0,0	68,81,4	1,9,1	256	149	0.000240526	0.0097716	1.0,1.0,1.0	0.975,0.84,0.7	0.162	up	chr4.4	23979515	23984748	+	--	--	K00454 lipoxygenase [EC:1.13.11.12] | (GenBank) linoleate 13S-lipoxygenase 2-1, related protein (A)	ko00591: Linoleic acid metabolism; ko00592: alpha-Linolenic acid metabolism; ko01100: Metabolic pathways; ko01110: Biosynthesis of secondary metabolites	XP_013457036.1	LOX31_SOLTU RecName: Full=Linoleate 13S-lipoxygenase 3-1, chloroplastic; EC=1.13.11.12; Flags: Precursor;	At1g17420	GO:0009570,chloroplast stroma; GO:0009534,chloroplast thylakoid; GO:0016165,linoleate 13S-lipoxygenase activity; GO:0046872,metal ion binding; GO:0016702,oxidoreductase activity, acting on single donors with incorporation of molecular oxygen, incorporation of two atoms of oxygen; GO:0006633,fatty acid biosynthetic process; GO:0034440,lipid oxidation; GO:0031408,oxylipin biosynthetic process; GO:0…	PF00305.19:Lipoxygenase	--	--	--
MS.gene71756	77840710	77840802	77840146	77840400	77841402	77841487	136,65,145	0,6,10	32,45,19	0,0,0	240	149	0.000243644	0.00982329	1.0,0.871,0.9	1.0,1.0,1.0	-0.076	down	chr1.1	77839277	77843054	-	--	--	K08730 phosphatidylserine synthase 2 [EC:2.7.8.29] | (GenBank) phosphatidylserine synthase (A)	ko00564: Glycerophospholipid metabolism; ko01100: Metabolic pathways; ko01110: Biosynthesis of secondary metabolites	XP_013470115.1	PSS1_ARATH RecName: Full=CDP-diacylglycerol--serine O-phosphatidyltransferase 1; EC=2.7.8.8; AltName: Full=Phosphatidylserine synthase 1;	At1g15110	GO:0005789,endoplasmic reticulum membrane; GO:0016021,integral component of membrane; GO:0031965,nuclear membrane; GO:0003882,CDP-diacylglycerol-serine O-phosphatidyltransferase activity; GO:0106245,NA; GO:0009556,microsporogenesis; GO:0006646,phosphatidylethanolamine biosynthetic process; GO:0006659,phosphatidylserine biosynthetic process; GO:0003674,molecular_function; GO:0003824,catalytic acti…	PF03034.15:Phosphatidyl serine synthase	--	--	--
MS.gene034333	12845156	12845232	12844126	12844194	12845325	12845405	24,31,19	1,2,5	1,1,24	0,0,0	224	149	0.000280203	0.0110462	0.941,0.912,0.717	1.0,1.0,1.0	-0.143	down	chr2.4	12840401	12848851	-	--	--	K01681 aconitate hydratase [EC:4.2.1.3] | (GenBank) cytoplasmic-like aconitate hydratase (A)	ko00020: Citrate cycle (TCA cycle); ko00630: Glyoxylate and dicarboxylate metabolism; ko01100: Metabolic pathways; ko01110: Biosynthesis of secondary metabolites; ko01200: Carbon metabolism; ko01210: 2-Oxocarboxylic acid metabolism; ko01230: Biosynthesis of amino acids	XP_003596988.1	ACO3M_ARATH RecName: Full=Aconitate hydratase 3, mitochondrial {ECO:0000303|PubMed:25061985}; Short=Aconitase 3 {ECO:0000303|PubMed:25061985}; Short=mACO1 {ECO:0000303|PubMed:24296071}; EC=4.2.1.3 {ECO:0000250|UniProtKB:P19414}; AltName: Full=Citrate hydro-lyase 3 {ECO:0000303|PubMed:25061985}; Flags: Precursor;	At2g05710	GO:0005618,cell wall; GO:0009507,chloroplast; GO:0009570,chloroplast stroma; GO:0005737,cytoplasm; GO:0005829,cytosol; GO:0005739,mitochondrion; GO:0005774,vacuolar membrane; GO:0051539,4 iron, 4 sulfur cluster binding; GO:0003994,aconitate hydratase activity; GO:0005524,ATP binding; GO:0047780,citrate dehydratase activity; GO:0005507,copper ion binding; GO:0006101,citrate metabolic process; GO:0…	PF00330.20:Aconitase family (aconitate hydratase)	--	--	--
MS.gene72152	6171324	6171378	6169857	6170063	6171545	6171606	5,20,16	0,0,8	3,8,9	0,0,0	202	149	0.00142296	0.0418398	1.0,1.0,0.596	1.0,1.0,1.0	-0.135	down	chr4.1	6169485	6171928	-	--	--	K00799 glutathione S-transferase [EC:2.5.1.18] | (GenBank) glutathione S-transferase, amino-terminal domain protein (A)	ko00480: Glutathione metabolism; ko01100: Metabolic pathways	XP_003630527.2	GSTT2_ARATH RecName: Full=Glutathione S-transferase T2; Short=AtGSTT2; EC=2.5.1.18; AltName: Full=GST class-theta member 2; AltName: Full=Glutathione S-transferase 10B;	At5g41210	GO:0005737,cytoplasm; GO:0005777,peroxisome; GO:0004364,glutathione transferase activity; GO:0006749,glutathione metabolic process; GO:0009407,toxin catabolic process; GO:0003674,molecular_function; GO:0003824,catalytic activity; GO:0016740,transferase activity; GO:0016765,transferase activity, transferring alkyl or aryl (other than methyl) groups; GO:0006790,sulfur compound metabolic process; GO…	PF02798.20:Glutathione S-transferase, N-terminal domain	--	--	--
MS.gene79098	74191674	74191786	74189368	74189544	74192324	74192795	838,5163,3817	7,326,82	692,567,371	3,1,0	260	149	4.44089e-16	5.90861e-13	0.986,0.901,0.964	0.992,0.997,1.0	-0.046	down	chr3.2	74188996	74193395	+	--	--	--	--	XP_003601926.1	GCL1_ARATH RecName: Full=LanC-like protein GCL1; AltName: Full=G protein-coupled receptor 2-like protein 1; Short=Protein GCR2-like 1;	At5g65280	GO:0019898,extrinsic component of membrane; GO:0005886,plasma membrane; GO:0005975,carbohydrate metabolic process; GO:0008152,metabolic process; GO:0008150,biological_process; GO:0044238,primary metabolic process; GO:0071704,organic substance metabolic process; GO:0005575,cellular_component; GO:0016020,membrane; GO:0044425,membrane part; GO:0005623,cell; GO:0044464,cell part; GO:0071944,cell peri…	PF05147.13:Lanthionine synthetase C-like protein	--	--	--
MS.gene79347	17832902	17832961	17832383	17832477	17833624	17833681	1,2,0	5,14,17	7,17,8	1,5,6	207	149	8.56608e-11	5.06541e-08	0.126,0.093,0.0	0.834,0.71,0.49	-0.605	down	chr3.1	17830352	17834740	-	--	--	--	--	XP_003622123.2	Y4744_ARATH RecName: Full=Uncharacterized protein At4g06744; Flags: Precursor;	--	GO:0005576,extracellular region; GO:0005575,cellular_component	--	--	--	--
MS.gene047107	74504163	74504315	74489733	74489892	74504458	74504637	109,45,65	9,5,10	8,38,44	0,0,0	298	149	1.76788e-07	2.76725e-05	0.858,0.818,0.765	1.0,1.0,1.0	-0.186	down	chr2.3	74487713	74522783	+	--	--	K17500 integrin-linked kinase-associated serine/threonine phosphatase 2C [EC:3.1.3.16] | (RefSeq) WAT1-related protein At3g18200-like (A)	--	XP_003593117.2	WTR10_ARATH RecName: Full=WAT1-related protein At1g68170;	At1g68170	GO:0016021,integral component of membrane; GO:0005886,plasma membrane; GO:0022857,transmembrane transporter activity; GO:0003674,molecular_function; GO:0005215,transporter activity; GO:0005575,cellular_component; GO:0016020,membrane; GO:0031224,intrinsic component of membrane; GO:0044425,membrane part; GO:0005623,cell; GO:0044464,cell part; GO:0071944,cell periphery	PF00892.20:EamA-like transporter family	--	--	--
MS.gene005970	66216563	66216779	66216215	66216282	66217414	66217421	31,45,35	4,0,0	9,20,52	17,5,1	298	149	0.00158485	0.0453472	0.795,1.0,1.0	0.209,0.667,0.963	0.319	up	chr1.3	66210980	66217421	-	--	--	K01840 phosphomannomutase [EC:5.4.2.8] | (RefSeq) uncharacterized protein LOC109794464 (A)	ko00051: Fructose and mannose metabolism; ko00520: Amino sugar and nucleotide sugar metabolism; ko01100: Metabolic pathways; ko01110: Biosynthesis of secondary metabolites	XP_003591897.1	--	At5g17530	GO:0009570,chloroplast stroma; GO:0046872,metal ion binding; GO:0004615,phosphomannomutase activity; GO:0016740,transferase activity; GO:0005975,carbohydrate metabolic process; GO:0003674,molecular_function; GO:0005488,binding; GO:0043167,ion binding; GO:0043169,cation binding; GO:0003824,catalytic activity; GO:0016853,isomerase activity; GO:0016866,intramolecular transferase activity; GO:0016868…	PF02878.16:Phosphoglucomutase/phosphomannomutase, alpha/beta/alpha domain I	--	--	--
MS.gene07729	51506382	51506553	51504859	51505093	51512032	51512122	107,0,4	0,39,5	84,132,9	0,0,0	298	149	2.31426e-08	4.92659e-06	1.0,0.0,0.286	1.0,1.0,1.0	-0.571	down	chr2.4	51503731	51512122	+	--	--	K13422 transcription factor MYC2 | (RefSeq) transcription factor MYC3-like isoform X1 (A)	ko04016: MAPK signaling pathway - plant; ko04075: Plant hormone signal transduction	XP_003595077.1	BH035_ARATH RecName: Full=Transcription factor bHLH35; AltName: Full=Basic helix-loop-helix protein 35; Short=AtbHLH35; Short=bHLH 35; AltName: Full=Transcription factor EN 41; AltName: Full=bHLH transcription factor bHLH035;	At5g57150	GO:0005634,nucleus; GO:0003700,DNA-binding transcription factor activity; GO:0046983,protein dimerization activity; GO:0043565,sequence-specific DNA binding; GO:0006355,regulation of transcription, DNA-templated; GO:0140110,transcription regulator activity; GO:0003674,molecular_function; GO:0005515,protein binding; GO:0005488,binding; GO:0003676,nucleic acid binding; GO:0003677,DNA binding; GO:00…	PF00010.26:Helix-loop-helix DNA-binding domain	bHLH	TF	bHLH
MS.gene03659	35077952	35078070	35077343	35077483	35078197	35078318	24,29,49	1,7,1	48,36,43	0,1,0	266	149	0.000275222	0.0109308	0.931,0.699,0.965	1.0,0.953,1.0	-0.119	down	chr3.4	35075978	35080313	-	--	--	K08819 cyclin-dependent kinase 12/13 [EC:2.7.11.22 2.7.11.23] | (GenBank) cyclin-dependent kinase C-2 (A)	--	XP_013459463.1	CDKC1_ORYSJ RecName: Full=Cyclin-dependent kinase C-1; Short=CDKC;1; EC=2.7.11.22; EC=2.7.11.23;	At5g10270	GO:0000307,cyclin-dependent protein kinase holoenzyme complex; GO:0005634,nucleus; GO:0005524,ATP binding; GO:0004693,cyclin-dependent protein serine/threonine kinase activity; GO:0106310,NA; GO:0106311,NA; GO:0008353,RNA polymerase II CTD heptapeptide repeat kinase activity; GO:0070816,phosphorylation of RNA polymerase II C-terminal domain; GO:0032968,positive regulation of transcription elongat…	PF00069.25:Protein kinase domain	--	--	--
MS.gene066504	30960791	30960916	30960272	30960396	30961001	30961156	37,3,34	1,15,2	22,12,7	0,0,0	273	149	7.28155e-05	0.00395433	0.953,0.098,0.903	1.0,1.0,1.0	-0.349	down	chr8.2	30958152	30967868	-	--	--	K08518 syntaxin-binding protein 5 | (RefSeq) uncharacterized protein LOC105111170 isoform X1 (A)	--	XP_013446325.1	--	At4g35560	GO:0005737,cytoplasm; GO:0005886,plasma membrane; GO:0005096,GTPase activator activity; GO:0045159,myosin II binding; GO:0019905,syntaxin binding; GO:0017157,regulation of exocytosis; GO:0003674,molecular_function; GO:0008047,enzyme activator activity; GO:0098772,molecular function regulator; GO:0030234,enzyme regulator activity; GO:0030695,GTPase regulator activity; GO:0060589,nucleoside-triphos…	PF12894.7:Anaphase-promoting complex subunit 4 WD40 domain	--	--	--
MS.gene26169	57440494	57440556	57440252	57440364	57440718	57441132	27,21,87	6,0,6	15,19,15	0,0,0	210	149	0.000120702	0.00609535	0.761,1.0,0.911	1.0,1.0,1.0	-0.109	down	chr5.4	57439268	57441986	+	--	--	K12133 MYB-related transcription factor LHY | (RefSeq) protein LHY-like isoform X1 (A)	ko04712: Circadian rhythm - plant	XP_003616176.1	RVE1_ARATH RecName: Full=Protein REVEILLE 1;	At5g17300	GO:0005634,nucleus; GO:0003677,DNA binding; GO:0003700,DNA-binding transcription factor activity; GO:0009734,auxin-activated signaling pathway; GO:0007623,circadian rhythm; GO:0010600,regulation of auxin biosynthetic process; GO:0006355,regulation of transcription, DNA-templated; GO:0003674,molecular_function; GO:0003676,nucleic acid binding; GO:0005488,binding; GO:0097159,organic cyclic compound…	PF00249.31:Myb-like DNA-binding domain	MYB-related	TF	MYB->MYB-related
MS.gene059050	55937750	55937825	55936469	55936535	55938793	55938847	5,2,25	1,0,1	9,7,1	7,20,2	223	149	2.61618e-09	7.73517e-07	0.77,1.0,0.944	0.462,0.19,0.25	0.604	up	chr2.4	55935554	55946100	-	--	--	K00218 protochlorophyllide reductase [EC:1.3.1.33] | (GenBank) NADPH-protochlorophyllide oxidoreductase (A)	ko00860: Porphyrin and chlorophyll metabolism; ko01100: Metabolic pathways; ko01110: Biosynthesis of secondary metabolites	XP_004487684.1	PORB_ARATH RecName: Full=Protochlorophyllide reductase B, chloroplastic; Short=PCR B; EC=1.3.1.33; AltName: Full=NADPH-protochlorophyllide oxidoreductase B; Short=POR B; Flags: Precursor;	At4g27440	GO:0009507,chloroplast; GO:0009941,chloroplast envelope; GO:0009707,chloroplast outer membrane; GO:0009534,chloroplast thylakoid; GO:0009535,chloroplast thylakoid membrane; GO:0005829,cytosol; GO:0003729,mRNA binding; GO:0019904,protein domain specific binding; GO:0016630,protochlorophyllide reductase activity; GO:0015995,chlorophyll biosynthetic process; GO:0015979,photosynthesis; GO:0009723,res…	--	--	--	--
MS.gene056299	76548791	76548938	76548494	76548566	76549739	76549819	64,296,151	0,15,3	9,23,18	0,0,0	295	149	0.000792015	0.0263444	1.0,0.909,0.962	1.0,1.0,1.0	-0.043	down	chr1.3	76547104	76549819	-	--	--	K09838 zeaxanthin epoxidase [EC:1.14.15.21] | (RefSeq) zeaxanthin epoxidase, chloroplastic (A)	ko00906: Carotenoid biosynthesis; ko01100: Metabolic pathways; ko01110: Biosynthesis of secondary metabolites	XP_013470337.1	MO3_ARATH RecName: Full=Monooxygenase 3 {ECO:0000303|PubMed:10216258}; Short=AtMO3 {ECO:0000303|PubMed:10216258}; EC=1.14.13.-;	At5g05320	GO:0071949,FAD binding; GO:0004497,monooxygenase activity; GO:0000166,nucleotide binding; GO:0003674,molecular_function; GO:0005488,binding; GO:0036094,small molecule binding; GO:0043167,ion binding; GO:0043168,anion binding; GO:0048037,cofactor binding; GO:0050660,flavin adenine dinucleotide binding; GO:0050662,coenzyme binding; GO:0097159,organic cyclic compound binding; GO:1901265,nucleoside p…	PF01494.19:FAD binding domain	--	--	--
MS.gene23548	61512377	61512461	61511526	61511600	61512749	61513674	67,115,93	0,3,11	11,8,9	0,0,0	232	149	0.00091725	0.0290572	1.0,0.961,0.844	1.0,1.0,1.0	-0.065	down	chr8.4	61511527	61513674	+	--	--	K01714 4-hydroxy-tetrahydrodipicolinate synthase [EC:4.3.3.7] | (GenBank) 4-hydroxy-tetrahydrodipicolinate synthase (A)	ko00261: Monobactam biosynthesis; ko00300: Lysine biosynthesis; ko01100: Metabolic pathways; ko01110: Biosynthesis of secondary metabolites; ko01230: Biosynthesis of amino acids	AFK44695.1	DAPA_TOBAC RecName: Full=4-hydroxy-tetrahydrodipicolinate synthase, chloroplastic; Short=HTPA synthase; EC=4.3.3.7; Flags: Precursor;	At2g45440	GO:0009507,chloroplast; GO:0008840,4-hydroxy-tetrahydrodipicolinate synthase; GO:0019877,diaminopimelate biosynthetic process; GO:0009089,lysine biosynthetic process via diaminopimelate; GO:0003674,molecular_function; GO:0003824,catalytic activity; GO:0016829,lyase activity; GO:0016835,carbon-oxygen lyase activity; GO:0016836,hydro-lyase activity; GO:0008152,metabolic process; GO:0006082,organic …	PF00701.22:Dihydrodipicolinate synthetase family	--	--	--
MS.gene033133	17451208	17451331	17451068	17451095	17451955	17452199	123,177,66	3,3,9	242,186,285	5,0,0	271	149	0.000133759	0.00647149	0.958,0.97,0.801	0.964,1.0,1.0	-0.078	down	chr8.2	17450862	17452337	+	--	--	K17279 receptor expression-enhancing protein 5/6 | (RefSeq) HVA22-like protein a (A)	--	PNY01527.1	HA22A_ARATH RecName: Full=HVA22-like protein a; Short=AtHVA22a;	At1g74520	GO:0016021,integral component of membrane; GO:0042538,hyperosmotic salinity response; GO:0009737,response to abscisic acid; GO:0009409,response to cold; GO:0009414,response to water deprivation; GO:0006950,response to stress; GO:0006970,response to osmotic stress; GO:0006972,hyperosmotic response; GO:0008150,biological_process; GO:0009628,response to abiotic stimulus; GO:0009651,response to salt …	PF03134.19:TB2/DP1, HVA22 family	--	--	--
MS.gene66389	87637954	87638164	87637272	87637450	87640181	87640549	115,9,12	3,0,12	12,17,69	0,0,0	298	149	0.000225515	0.00952531	0.95,1.0,0.333	1.0,1.0,1.0	-0.239	down	chr6.2	87637273	87640549	-	--	--	K20728 vegetative storage protein 2 | (RefSeq) vegetative storage protein 2-like (A)	ko04016: MAPK signaling pathway - plant	XP_003620757.1	PPA1_SOLLC RecName: Full=Acid phosphatase 1; EC=3.1.3.2; AltName: Full=Apase-1(1); Flags: Precursor;	At4g29260	GO:0003993,acid phosphatase activity; GO:0003674,molecular_function; GO:0003824,catalytic activity; GO:0016787,hydrolase activity; GO:0016788,hydrolase activity, acting on ester bonds; GO:0016791,phosphatase activity; GO:0042578,phosphoric ester hydrolase activity	PF03767.14:HAD superfamily, subfamily IIIB (Acid phosphatase)	--	--	--
MS.gene019513	69904600	69904666	69904135	69904202	69904762	69904889	17,13,12	1,4,2	12,22,50	0,0,0	214	149	0.000231977	0.00964519	0.922,0.694,0.807	1.0,1.0,1.0	-0.192	down	chr8.1	69904136	69905817	+	--	--	K01803 triosephosphate isomerase (TIM) [EC:5.3.1.1] | (RefSeq) triosephosphate isomerase, cytosolic (A)	ko00010: Glycolysis / Gluconeogenesis; ko00051: Fructose and mannose metabolism; ko00562: Inositol phosphate metabolism; ko00710: Carbon fixation in photosynthetic organisms; ko01100: Metabolic pathways; ko01110: Biosynthesis of secondary metabolites; ko01200: Carbon metabolism; ko01230: Biosynthesis of amino acids	XP_003627627.1	ERG3_ORYSI RecName: Full=Elicitor-responsive protein 3; AltName: Full=16 kDa phloem protein; AltName: Full=RPP16;	At1g63220	GO:0005737,cytoplasm; GO:0046872,metal ion binding; GO:0003674,molecular_function; GO:0005488,binding; GO:0043167,ion binding; GO:0043169,cation binding; GO:0005622,intracellular; GO:0005575,cellular_component; GO:0005623,cell; GO:0044424,intracellular part; GO:0044464,cell part	PF00168.30:C2 domain	--	--	--
MS.gene33715	83710140	83710321	83709840	83709907	83712046	83712258	93,154,66	3,8,7	13,8,12	0,0,0	298	149	0.000131209	0.0064657	0.939,0.906,0.825	1.0,1.0,1.0	-0.11	down	chr4.3	83709841	83712972	+	--	--	K20723 reticulon-3 | (GenBank) reticulon-like protein B2 (A)	--	XP_003604578.1	RTNLL_ARATH RecName: Full=Reticulon-like protein B12; Short=AtRTNLB12;	At3g54120	GO:0005789,endoplasmic reticulum membrane; GO:0016021,integral component of membrane; GO:0005622,intracellular; GO:0005575,cellular_component; GO:0016020,membrane; GO:0005623,cell; GO:0005737,cytoplasm; GO:0005783,endoplasmic reticulum; GO:0043231,intracellular membrane-bounded organelle; GO:0012505,endomembrane system; GO:0031984,organelle subcompartment; GO:0042175,nuclear outer membrane-endopl…	PF02453.17:Reticulon	--	--	--
MS.gene55183	70627821	70627942	70627646	70627728	70628017	70628146	2,12,295	1,6,3	197,6,15	0,0,0	269	149	0.000774007	0.0259073	0.526,0.526,0.982	1.0,1.0,1.0	-0.322	down	chr5.2	70625825	70628146	-	--	--	K15731 carboxy-terminal domain RNA polymerase II polypeptide A small phosphatase [EC:3.1.3.16] | (GenBank) NLI interacting factor-like phosphatase (A)	--	XP_003616639.1	TIM50_PHYIN RecName: Full=Mitochondrial import inner membrane translocase subunit TIM50; AltName: Full=NIF domain protein 3; Flags: Precursor;	At3g55960	GO:0016021,integral component of membrane; GO:0005744,TIM23 mitochondrial import inner membrane translocase complex; GO:0015031,protein transport; GO:0008104,protein localization; GO:0006810,transport; GO:0008150,biological_process; GO:0015833,peptide transport; GO:0033036,macromolecule localization; GO:0042886,amide transport; GO:0045184,establishment of protein localization; GO:0051179,localiza…	PF03031.18:NLI interacting factor-like phosphatase	--	--	--
MS.gene07219	70256107	70256187	70255855	70255939	70257154	70257299	11,15,314	0,0,13	16,16,52	0,0,0	228	149	0.00143873	0.042071	1.0,1.0,0.94	1.0,1.0,1.0	-0.02	down	chr1.4	70253806	70258042	-	--	--	K08678 UDP-glucuronate decarboxylase [EC:4.1.1.35] | (GenBank) UDP-glucuronic acid decarboxylase-like protein (A)	ko00520: Amino sugar and nucleotide sugar metabolism; ko01100: Metabolic pathways	XP_003591521.1	UXS2_ARATH RecName: Full=UDP-glucuronic acid decarboxylase 2; EC=4.1.1.35; AltName: Full=UDP-XYL synthase 2; AltName: Full=UDP-glucuronate decarboxylase 2; Short=UGD; Short=UXS-2; AltName: Full=dTDP-glucose 4-6-dehydratase homolog D18;	At3g62830	GO:0005737,cytoplasm; GO:0005768,endosome; GO:0005794,Golgi apparatus; GO:0032580,Golgi cisterna membrane; GO:0000139,Golgi membrane; GO:0000138,Golgi trans cisterna; GO:0016021,integral component of membrane; GO:0016020,membrane; GO:0005886,plasma membrane; GO:0005802,trans-Golgi network; GO:0008460,dTDP-glucose 4,6-dehydratase activity; GO:0070403,NAD+ binding; GO:0048040,UDP-glucuronate decarb…	PF16363.5:GDP-mannose 4,6 dehydratase	--	--	--
MS.gene28295	64642322	64642772	64641587	64641894	64643509	64643914	51,120,128	0,2,11	37,40,23	0,0,0	298	149	0.000308337	0.0118911	1.0,0.968,0.853	1.0,1.0,1.0	-0.06	down	chr2.1	64641371	64643914	-	--	--	--	--	XP_003594165.1	--	At3g20300	GO:0016021,integral component of membrane; GO:0005575,cellular_component; GO:0016020,membrane; GO:0031224,intrinsic component of membrane; GO:0044425,membrane part	PF12056.8:Protein of unknown function (DUF3537)	--	--	--
MS.gene018629	11742271	11742392	11742077	11742166	11742495	11742806	54,89,198	4,0,23	1,10,68	0,0,0	269	149	1.10697e-05	0.000818233	0.882,1.0,0.827	1.0,1.0,1.0	-0.097	down	chr7.4	11739275	11742806	-	--	--	K05681 ATP-binding cassette, subfamily G (WHITE), member 2 | (RefSeq) ABC transporter G family member 21 (A)	ko02010: ABC transporters	XP_003625399.2	PDR1_NICPL RecName: Full=Pleiotropic drug resistance protein 1; AltName: Full=NpPDR1;	At1g15520	GO:0016021,integral component of membrane; GO:0005886,plasma membrane; GO:0005524,ATP binding; GO:0042626,ATPase activity, coupled to transmembrane movement of substances; GO:0006952,defense response; GO:0000166,nucleotide binding; GO:0003674,molecular_function; GO:0005488,binding; GO:0008144,drug binding; GO:0017076,purine nucleotide binding; GO:0030554,adenyl nucleotide binding; GO:0032553,ribo…	PF01061.24:ABC-2 type transporter	--	--	--
MS.gene033150	17658708	17658812	17658245	17658325	17659156	17659224	155,142,242	1,9,15	51,107,155	0,0,0	252	149	1.3004e-06	0.000157289	0.989,0.903,0.905	1.0,1.0,1.0	-0.068	down	chr8.2	17657568	17664227	+	--	--	K00294 1-pyrroline-5-carboxylate dehydrogenase [EC:1.2.1.88] | (GenBank) delta-1-pyrroline-5-carboxylate dehydrogenase (A)	ko00250: Alanine, aspartate and glutamate metabolism; ko00330: Arginine and proline metabolism; ko01100: Metabolic pathways	XP_003609016.1	AL121_ARATH RecName: Full=Delta-1-pyrroline-5-carboxylate dehydrogenase 12A1, mitochondrial; Short=AtP5CDH; Short=P5C dehydrogenase; EC=1.2.1.88; AltName: Full=Aldehyde dehydrogenase family 12 member A1; AltName: Full=L-glutamate gamma-semialdehyde dehydrogenase; Flags: Precursor;	At5g62530	GO:0005829,cytosol; GO:0005759,mitochondrial matrix; GO:0005739,mitochondrion; GO:0009536,plastid; GO:0003842,1-pyrroline-5-carboxylate dehydrogenase activity; GO:0004029,aldehyde dehydrogenase (NAD) activity; GO:0050897,cobalt ion binding; GO:0008270,zinc ion binding; GO:0010133,proline catabolic process to glutamate; GO:0006560,proline metabolic process; GO:0072593,reactive oxygen species metab…	PF00171.22:Aldehyde dehydrogenase family	--	--	--
MS.gene004330	68513673	68513869	68513009	68513193	68514910	68515149	21,29,21	0,8,2	15,44,12	0,0,0	298	149	1.45707e-05	0.00106226	1.0,0.644,0.84	1.0,1.0,1.0	-0.172	down	chr2.3	68511091	68517409	-	--	--	K03120 transcription initiation factor TFIID TATA-box-binding protein | (RefSeq) TATA-box-binding protein 2-like (A)	ko03022: Basal transcription factors	XP_003593800.1	CAD1_ARATH RecName: Full=MACPF domain-containing protein CAD1; AltName: Full=Protein CONSTITUTIVELY ACTIVATED CELL DEATH 1; Short=Protein CAD1;	At1g29690	GO:0005886,plasma membrane; GO:0008219,cell death; GO:0006955,immune response; GO:0009626,plant-type hypersensitive response; GO:2000031,regulation of salicylic acid mediated signaling pathway; GO:0010337,regulation of salicylic acid metabolic process; GO:0008150,biological_process; GO:0009987,cellular process; GO:0002376,immune system process; GO:0050896,response to stimulus; GO:0006952,defense …	PF01823.19:MAC/Perforin domain	--	--	--
MS.gene70701	65224368	65224549	65223248	65223347	65224857	65225038	1,4,1	0,4,1	10,3,8	0,0,0	298	149	0.000893586	0.0286486	1.0,0.333,0.333	1.0,1.0,1.0	-0.445	down	chr3.3	65223249	65226864	+	--	--	K08287 dual-specificity kinase [EC:2.7.12.1] | (GenBank) kinase AFC1 (A)	--	XP_003601149.1	AFC2_ARATH RecName: Full=Serine/threonine-protein kinase AFC2; EC=2.7.12.1;	At4g24740	GO:0005524,ATP binding; GO:0004672,protein kinase activity; GO:0106310,NA; GO:0004674,protein serine/threonine kinase activity; GO:0004712,protein serine/threonine/tyrosine kinase activity; GO:0106311,NA; GO:0004714,transmembrane receptor protein tyrosine kinase activity; GO:0006397,mRNA processing; GO:0046777,protein autophosphorylation; GO:0000166,nucleotide binding; GO:0003674,molecular_functi…	PF00069.25:Protein kinase domain	--	--	--
MS.gene51711	6826749	6826837	6821413	6821605	6827130	6827216	76,114,31	3,29,5	11,114,20	0,0,0	236	149	2.19114e-09	6.85956e-07	0.941,0.713,0.797	1.0,1.0,1.0	-0.183	down	chr3.4	6818692	6827923	+	--	--	K12818 ATP-dependent RNA helicase DHX8/PRP22 [EC:3.6.4.13] | (RefSeq) hypothetical protein (A)	ko03040: Spliceosome	XP_003598367.2	PTR36_ARATH RecName: Full=Probable peptide/nitrate transporter At3g43790; AltName: Full=Protein ZINC INDUCED FACILITATOR-LIKE 2;	At3g43790	GO:0016021,integral component of membrane; GO:0022857,transmembrane transporter activity; GO:0009624,response to nematode; GO:0003674,molecular_function; GO:0005215,transporter activity; GO:0008150,biological_process; GO:0009605,response to external stimulus; GO:0009607,response to biotic stimulus; GO:0051707,response to other organism; GO:0043207,response to external biotic stimulus; GO:0050896,…	PF07690.16:Major Facilitator Superfamily	--	--	--
MS.gene23487	14496347	14496432	14495759	14495819	14496573	14496662	35,24,42	1,6,1	16,33,86	0,0,0	233	149	0.000900901	0.0287102	0.957,0.719,0.964	1.0,1.0,1.0	-0.12	down	chr7.3	14493223	14496841	-	--	--	--	--	XP_013449895.1	RUS2_ARATH RecName: Full=Protein root UVB sensitive 2, chloroplastic {ECO:0000303|PubMed:19515790}; AltName: Full=Protein WEAK AUXIN RESPONSE 1 {ECO:0000303|PubMed:20562234};	At2g31190	GO:0009941,chloroplast envelope; GO:0005739,mitochondrion; GO:0009536,plastid; GO:0009926,auxin polar transport; GO:0010224,response to UV-B; GO:0006810,transport; GO:0008150,biological_process; GO:0009914,hormone transport; GO:0010817,regulation of hormone levels; GO:0051179,localization; GO:0051234,establishment of localization; GO:0060918,auxin transport; GO:0065007,biological regulation; GO:0…	PF04884.14:Vitamin B6 photo-protection and homoeostasis	--	--	--
MS.gene88793	55368510	55368608	55368348	55368414	55369745	55370089	1,0,13	9,2,12	73,9,86	0,0,0	246	149	0	0	0.063,0.0,0.396	1.0,1.0,1.0	-0.847	down	chr5.4	55367564	55370089	-	--	--	K00655 1-acyl-sn-glycerol-3-phosphate acyltransferase [EC:2.3.1.51] | (RefSeq) uncharacterized protein LOC105166581 (A)	ko00561: Glycerolipid metabolism; ko00564: Glycerophospholipid metabolism; ko01100: Metabolic pathways; ko01110: Biosynthesis of secondary metabolites	XP_013464597.1	MORF8_ARATH RecName: Full=Multiple organellar RNA editing factor 8, chloroplastic/mitochondrial {ECO:0000305}; AltName: Full=RNA editing-interacting protein 1 {ECO:0000303|PubMed:22566615}; Flags: Precursor;	At3g15000	GO:0009507,chloroplast; GO:0005829,cytosol; GO:0005739,mitochondrion; GO:0050897,cobalt ion binding; GO:0003729,mRNA binding; GO:0046983,protein dimerization activity; GO:0042803,protein homodimerization activity; GO:0016554,cytidine to uridine editing; GO:0080156,mitochondrial mRNA modification; GO:0006397,mRNA processing; GO:0009451,RNA modification; GO:0003674,molecular_function; GO:0005488,bi…	--	--	--	--
MS.gene01749	71949657	71949729	71948790	71948850	71950286	71950316	119,46,93	13,0,13	134,88,123	3,2,3	220	149	0.000175259	0.00811068	0.861,1.0,0.829	0.968,0.968,0.965	-0.07	down	chr2.3	71932904	71952100	+	--	--	K14774 U3 small nucleolar RNA-associated protein 25 | (GenBank) U3 small nucleolar RNA-associated-like protein (A)	--	XP_003593482.2	--	At1g17690	GO:0005730,nucleolus; GO:0032040,small-subunit processome; GO:0019843,rRNA binding; GO:0034511,U3 snoRNA binding; GO:0000462,maturation of SSU-rRNA from tricistronic rRNA transcript (SSU-rRNA, 5.8S rRNA, LSU-rRNA); GO:0003674,molecular_function; GO:0003676,nucleic acid binding; GO:0003723,RNA binding; GO:0005488,binding; GO:0097159,organic cyclic compound binding; GO:1901363,heterocyclic compound…	PF06862.12:Utp25, U3 small nucleolar RNA-associated SSU processome protein 25	--	--	--
MS.gene01749	71950619	71950725	71950426	71950521	71950903	71950966	187,59,85	14,13,17	169,92,150	7,4,6	254	149	4.36648e-05	0.00256517	0.887,0.727,0.746	0.934,0.931,0.936	-0.147	down	chr2.3	71932904	71952100	+	--	--	K14774 U3 small nucleolar RNA-associated protein 25 | (GenBank) U3 small nucleolar RNA-associated-like protein (A)	--	XP_003593482.2	--	At1g17690	GO:0005730,nucleolus; GO:0032040,small-subunit processome; GO:0019843,rRNA binding; GO:0034511,U3 snoRNA binding; GO:0000462,maturation of SSU-rRNA from tricistronic rRNA transcript (SSU-rRNA, 5.8S rRNA, LSU-rRNA); GO:0003674,molecular_function; GO:0003676,nucleic acid binding; GO:0003723,RNA binding; GO:0005488,binding; GO:0097159,organic cyclic compound binding; GO:1901363,heterocyclic compound…	PF06862.12:Utp25, U3 small nucleolar RNA-associated SSU processome protein 25	--	--	--
MS.gene023912	27944968	27945290	27943328	27943867	27946099	27946360	60,47,50	0,18,1	170,52,101	0,0,4	298	149	0.00114126	0.0349069	1.0,0.566,0.962	1.0,1.0,0.927	-0.133	down	chr7.2	27943329	27946360	+	--	--	K13229 2,4-dihydroxy-1,4-benzoxazin-3-one-glucoside dioxygenase [EC:1.14.11.59] | (RefSeq) DIBOA-glucoside dioxygenase BX6 (A)	ko00402: Benzoxazinoid biosynthesis	XP_003623991.1	ACH12_ARATH RecName: Full=1-aminocyclopropane-1-carboxylate oxidase homolog 12; EC=1.14.-.-;	At5g59540	GO:0046872,metal ion binding; GO:0016491,oxidoreductase activity; GO:0003674,molecular_function; GO:0005488,binding; GO:0043167,ion binding; GO:0043169,cation binding; GO:0003824,catalytic activity	PF03171.20:2OG-Fe(II) oxygenase superfamily	--	--	--
MS.gene017087	72693504	72693588	72692179	72692238	72695369	72695441	41,7,13	15,9,20	16,17,8	2,0,3	232	149	0.000218152	0.00936296	0.637,0.333,0.295	0.837,1.0,0.631	-0.401	down	chr5.1	72690923	72695441	-	--	--	K09874 aquaporin NIP | (GenBank) major intrinsic protein (MIP) family transporter (A)	--	--	--	--	--	--	--	--	--
MS.gene071195	40839912	40839978	40839527	40839588	40840155	40840253	51,50,161	0,14,0	183,58,157	0,0,0	214	149	0.000222089	0.00945565	1.0,0.713,1.0	1.0,1.0,1.0	-0.096	down	chr4.2	40839528	40842141	+	--	--	K07025 putative hydrolase of the HAD superfamily | (GenBank) haloacid dehalogenase-like hydrolase (A)	--	XP_003606690.1	--	At5g59480	GO:0033883,pyridoxal phosphatase activity; GO:0003674,molecular_function; GO:0003824,catalytic activity; GO:0016787,hydrolase activity; GO:0016788,hydrolase activity, acting on ester bonds; GO:0016791,phosphatase activity; GO:0042578,phosphoric ester hydrolase activity	PF13419.6:Haloacid dehalogenase-like hydrolase	--	--	--
MS.gene30891	50474756	50474897	50471634	50471919	50475327	50475600	53,49,39	0,6,4	101,87,58	0,0,0	289	149	3.08368e-05	0.00193075	1.0,0.808,0.834	1.0,1.0,1.0	-0.119	down	chr1.2	50471635	50476004	+	--	--	K00939 adenylate kinase [EC:2.7.4.3] | (GenBank) adenylate kinase (A)	ko00230: Purine metabolism; ko00730: Thiamine metabolism; ko01100: Metabolic pathways; ko01110: Biosynthesis of secondary metabolites; ko01240: Biosynthesis of cofactors	XP_013468262.1	KAD1_ORYSJ RecName: Full=Probable adenylate kinase 1, chloroplastic; EC=2.7.4.3; AltName: Full=Adenylate monophosphate kinase 1; Flags: Precursor;	At2g37250	GO:0009570,chloroplast stroma; GO:0005737,cytoplasm; GO:0005739,mitochondrion; GO:0005634,nucleus; GO:0004017,adenylate kinase activity; GO:0005524,ATP binding; GO:0008652,cellular amino acid biosynthetic process; GO:0048364,root development; GO:0048367,shoot system development; GO:0003674,molecular_function; GO:0003824,catalytic activity; GO:0016301,kinase activity; GO:0016740,transferase activi…	PF00406.22:Adenylate kinase	--	--	--
MS.gene74931	76488034	76488181	76487072	76487144	76489039	76489121	245,427,499	3,0,28	37,69,9	0,0,0	295	149	0.000670387	0.0228705	0.976,1.0,0.9	1.0,1.0,1.0	-0.041	down	chr1.3	76485809	76492323	-	--	--	K09838 zeaxanthin epoxidase [EC:1.14.15.21] | (RefSeq) zeaxanthin epoxidase, chloroplastic (A)	ko00906: Carotenoid biosynthesis; ko01100: Metabolic pathways; ko01110: Biosynthesis of secondary metabolites	XP_013470337.1	MO2_ARATH RecName: Full=Monooxygenase 2 {ECO:0000303|PubMed:10216258}; Short=AtMO2 {ECO:0000303|PubMed:10216258}; EC=1.14.13.-;	At4g38540	GO:0005886,plasma membrane; GO:0071949,FAD binding; GO:0004497,monooxygenase activity; GO:0002239,response to oomycetes; GO:0000166,nucleotide binding; GO:0003674,molecular_function; GO:0005488,binding; GO:0036094,small molecule binding; GO:0043167,ion binding; GO:0043168,anion binding; GO:0048037,cofactor binding; GO:0050660,flavin adenine dinucleotide binding; GO:0050662,coenzyme binding; GO:00…	PF01494.19:FAD binding domain	--	--	--
MS.gene018202	12107236	12107882	12106480	12106721	12109742	12110021	905,586,1502	0,0,65	516,752,276	0,0,0	298	149	1.6639e-08	3.68971e-06	1.0,1.0,0.92	1.0,1.0,1.0	-0.027	down	chr6.3	12106332	12110021	-	--	--	K00318 proline dehydrogenase [EC:1.5.5.2] | (GenBank) proline dehydrogenase (A)	ko00330: Arginine and proline metabolism; ko01100: Metabolic pathways; ko01110: Biosynthesis of secondary metabolites	XP_013451199.1	PROD1_ARATH RecName: Full=Proline dehydrogenase 1, mitochondrial; EC=1.5.5.2; AltName: Full=Osmotic stress-induced proline dehydrogenase; AltName: Full=Proline oxidase; AltName: Full=Protein EARLY RESPONSIVE TO DEHYDRATION 5; Flags: Precursor;	At3g30775	GO:0005739,mitochondrion; GO:0071949,FAD binding; GO:0004657,proline dehydrogenase activity; GO:0071456,cellular response to hypoxia; GO:0042742,defense response to bacterium; GO:0010133,proline catabolic process to glutamate; GO:0006979,response to oxidative stress; GO:0009414,response to water deprivation; GO:0000166,nucleotide binding; GO:0003674,molecular_function; GO:0005488,binding; GO:0036…	PF01619.18:Proline dehydrogenase	--	--	--
MS.gene058158	73620450	73620522	73620184	73620313	73620666	73620732	315,44,67	17,6,1	290,57,46	5,0,0	220	149	0.000150232	0.00707552	0.926,0.832,0.978	0.975,1.0,1.0	-0.08	down	chr1.4	73617999	73622057	+	--	--	K05765 cofilin | (RefSeq) uncharacterized LOC105781290 (A)	--	XP_013469430.1	BH111_ARATH RecName: Full=Transcription factor bHLH111; AltName: Full=Basic helix-loop-helix protein 111; Short=AtbHLH111; Short=bHLH 111; AltName: Full=Transcription factor EN 66; AltName: Full=bHLH transcription factor bHLH111;	At3g20640	GO:0005634,nucleus; GO:0000981,DNA-binding transcription factor activity, RNA polymerase II-specific; GO:0046983,protein dimerization activity; GO:0000978,RNA polymerase II proximal promoter sequence-specific DNA binding; GO:0006357,regulation of transcription by RNA polymerase II; GO:0140110,transcription regulator activity; GO:0003674,molecular_function; GO:0003700,DNA-binding transcription fac…	--	--	--	--
MS.gene23340	37228217	37228293	37227240	37227310	37228570	37228660	28,20,24	0,13,0	38,47,157	0,0,0	224	149	0.000608123	0.0208802	1.0,0.506,1.0	1.0,1.0,1.0	-0.165	down	chr4.4	37223489	37229718	-	--	--	K00801 farnesyl-diphosphate farnesyltransferase [EC:2.5.1.21] | (GenBank) squalene synthase (A)	ko00100: Steroid biosynthesis; ko00909: Sesquiterpenoid and triterpenoid biosynthesis; ko01100: Metabolic pathways; ko01110: Biosynthesis of secondary metabolites	XP_003607040.2	SQS2_PANGI RecName: Full=Squalene synthase 2 {ECO:0000303|PubMed:29509695, ECO:0000303|Ref.1}; Short=PgSS2 {ECO:0000303|PubMed:29509695, ECO:0000303|Ref.1}; Short=SQS 2 {ECO:0000305}; EC=2.5.1.21 {ECO:0000250|UniProtKB:P53799}; AltName: Full=FPP:FPP farnesyltransferase SS2 {ECO:0000305}; AltName: Full=Farnesyl-diphosphate farnesyltransferase SS2 {ECO:0000305};	At4g34640	GO:0005789,endoplasmic reticulum membrane; GO:0016021,integral component of membrane; GO:0004310,farnesyl-diphosphate farnesyltransferase activity; GO:0051996,squalene synthase activity; GO:0008299,isoprenoid biosynthetic process; GO:0003674,molecular_function; GO:0003824,catalytic activity; GO:0004311,farnesyltranstransferase activity; GO:0004659,prenyltransferase activity; GO:0016740,transferas…	PF00494.19:Squalene/phytoene synthase	--	--	--
MS.gene060101	69319827	69319908	69319514	69319686	69320302	69320405	48,25,34	2,4,4	47,31,28	0,0,0	229	149	4.00672e-05	0.00242316	0.94,0.803,0.847	1.0,1.0,1.0	-0.137	down	chr6.2	69318014	69325357	+	--	--	K23700 [histone H3]-lysine36 N-trimethyltransferase [EC:2.1.1.359] | (RefSeq) histone-lysine N-methyltransferase, H3 lysine-36 specific-like (A)	ko00310: Lysine degradation; ko01100: Metabolic pathways	XP_003619545.2	ASHH3_ARATH RecName: Full=Histone-lysine N-methyltransferase ASHH3; EC=2.1.1.-; AltName: Full=ASH1 homolog 3; AltName: Full=Protein SET DOMAIN GROUP 7;	At2g44150	GO:0000785,chromatin; GO:0000775,chromosome, centromeric region; GO:0005783,endoplasmic reticulum; GO:0005634,nucleus; GO:0009506,plasmodesma; GO:0046975,histone methyltransferase activity (H3-K36 specific); GO:0016279,protein-lysine N-methyltransferase activity; GO:0006355,regulation of transcription, DNA-templated; GO:0003674,molecular_function; GO:0003824,catalytic activity; GO:0008168,methylt…	PF00856.28:SET domain	SET	TR	SET
MS.gene043403	9556681	9556917	9556227	9556351	9557101	9557272	195,126,544	1,0,65	133,276,278	0,5,1	298	149	4.46876e-06	0.000440421	0.99,1.0,0.807	1.0,0.965,0.993	-0.054	down	chr2.2	9556228	9558441	-	--	--	K08726 soluble epoxide hydrolase / lipid-phosphate phosphatase [EC:3.3.2.10 3.1.3.76] | (RefSeq) uncharacterized protein LOC110941524 (A)	ko00590: Arachidonic acid metabolism; ko01100: Metabolic pathways; ko04146: Peroxisome	XP_013465074.1	--	At4g02340	GO:0004301,epoxide hydrolase activity; GO:0016787,hydrolase activity; GO:0003674,molecular_function; GO:0003824,catalytic activity; GO:0016801,hydrolase activity, acting on ether bonds; GO:0016803,ether hydrolase activity	PF00561.20:alpha/beta hydrolase fold	--	--	--
MS.gene004016	39516098	39516164	39515736	39515797	39516301	39516399	132,235,148	16,19,1	141,153,226	0,0,0	214	149	1.1935e-10	6.3518e-08	0.852,0.896,0.99	1.0,1.0,1.0	-0.087	down	chr4.3	39515737	39518269	+	--	--	K07025 putative hydrolase of the HAD superfamily | (GenBank) haloacid dehalogenase-like hydrolase (A)	--	XP_003606690.1	--	At5g59480	GO:0033883,pyridoxal phosphatase activity; GO:0003674,molecular_function; GO:0003824,catalytic activity; GO:0016787,hydrolase activity; GO:0016788,hydrolase activity, acting on ester bonds; GO:0016791,phosphatase activity; GO:0042578,phosphoric ester hydrolase activity	PF13419.6:Haloacid dehalogenase-like hydrolase	--	--	--
MS.gene001169	67619676	67619738	67619468	67619580	67619919	67620348	3,16,31	0,11,14	6,25,3	1,0,0	210	149	4.61816e-06	0.00044687	1.0,0.508,0.611	0.81,1.0,1.0	-0.23	down	chr6.1	67617744	67621399	+	--	--	K12133 MYB-related transcription factor LHY | (RefSeq) LHY protein (A)	ko04712: Circadian rhythm - plant	XP_013452818.1	RVE7_ARATH RecName: Full=Protein REVEILLE 7; AltName: Full=Early-phytochrome-responsive 1; AltName: Full=MYB-related transcription factor EPR1;	At1g18330	GO:0005634,nucleus; GO:0003677,DNA binding; GO:0003700,DNA-binding transcription factor activity; GO:0007623,circadian rhythm; GO:0006355,regulation of transcription, DNA-templated; GO:0003674,molecular_function; GO:0003676,nucleic acid binding; GO:0005488,binding; GO:0097159,organic cyclic compound binding; GO:1901363,heterocyclic compound binding; GO:0140110,transcription regulator activity; GO…	PF00249.31:Myb-like DNA-binding domain	MYB-related	TF	MYB->MYB-related
MS.gene32846	81979597	81979730	81979357	81979510	81980109	81980144	149,94,80	0,50,7	30,57,37	0,0,0	281	149	3.73577e-06	0.000382341	1.0,0.499,0.858	1.0,1.0,1.0	-0.214	down	chr3.1	81979358	81980144	-	--	--	K13148 integrator complex subunit 11 [EC:3.1.27.-] | (RefSeq) LOW QUALITY PROTEIN: cleavage and polyadenylation specificity factor subunit 3-II (A)	--	XP_013466582.1	RIE1_ARATH RecName: Full=E3 ubiquitin protein ligase RIE1; EC=2.3.2.27; AltName: Full=Protein RING-FINGER FOR EMBRYOGENESIS 1; AltName: Full=RING-type E3 ubiquitin transferase RIE1 {ECO:0000305};	At1g68070	GO:0016021,integral component of membrane; GO:0005774,vacuolar membrane; GO:0046872,metal ion binding; GO:0016740,transferase activity; GO:0009793,embryo development ending in seed dormancy; GO:0016567,protein ubiquitination; GO:0003674,molecular_function; GO:0005488,binding; GO:0043167,ion binding; GO:0043169,cation binding; GO:0003824,catalytic activity; GO:0000003,reproduction; GO:0003006,deve…	--	--	--	--
MS.gene039515	7921420	7921588	7921005	7921146	7921801	7921895	10,39,15	0,4,6	8,41,14	0,0,0	298	149	1.07677e-05	0.000812927	1.0,0.83,0.556	1.0,1.0,1.0	-0.205	down	chr3.1	7914918	7926210	-	--	--	K05665 ATP-binding cassette, subfamily C (CFTR/MRP), member 1 [EC:7.6.2.3] | (RefSeq) ABC transporter C family member 12-like (A)	ko02010: ABC transporters	XP_013458896.1	AB12C_ARATH RecName: Full=ABC transporter C family member 12; Short=ABC transporter ABCC.12; Short=AtABCC12; EC=7.6.2.2; AltName: Full=ATP-energized glutathione S-conjugate pump 13; AltName: Full=Glutathione S-conjugate-transporting ATPase 13; AltName: Full=Multidrug resistance-associated protein 13;	At1g30410	GO:0016021,integral component of membrane; GO:0016020,membrane; GO:0000325,plant-type vacuole; GO:0005774,vacuolar membrane; GO:0008559,xenobiotic transmembrane transporting ATPase activity; GO:0005524,ATP binding; GO:0042626,ATPase activity, coupled to transmembrane movement of substances; GO:0055085,transmembrane transport; GO:0003674,molecular_function; GO:0042623,ATPase activity, coupled; GO:…	PF00664.23:ABC transporter transmembrane region	--	--	--
MS.gene047525	71996024	71996141	71995406	71995463	71996265	71996328	57,289,267	2,13,24	4,6,69	0,0,0	265	149	9.93934e-06	0.000812927	0.941,0.926,0.862	1.0,1.0,1.0	-0.09	down	chr2.1	71995407	72000447	+	--	--	K19995 secretory carrier-associated membrane protein | (GenBank) secretory carrier-associated membrane protein (A)	--	XP_003593475.1	SCAM_PEA RecName: Full=Secretory carrier-associated membrane protein; Short=Secretory carrier membrane protein;	At1g11180	GO:0016021,integral component of membrane; GO:0005886,plasma membrane; GO:0030658,transport vesicle membrane; GO:0015031,protein transport; GO:0008104,protein localization; GO:0006810,transport; GO:0008150,biological_process; GO:0015833,peptide transport; GO:0033036,macromolecule localization; GO:0042886,amide transport; GO:0045184,establishment of protein localization; GO:0051179,localization; G…	PF04144.13:SCAMP family	--	--	--
MS.gene068856	41528548	41528719	41527050	41527201	41529569	41529678	2,0,0	27,40,8	3,6,7	13,28,18	298	149	1.05261e-05	0.000812927	0.036,0.0,0.0	0.103,0.097,0.163	-0.109	down	chr3.2	41524166	41532255	+	--	--	K04460 serine/threonine-protein phosphatase 5 [EC:3.1.3.16] | (GenBank) serine/threonine-protein phosphatase (A)	--	XP_013459748.1	PPP5_SOLLC RecName: Full=Serine/threonine-protein phosphatase 5; EC=3.1.3.16; AltName: Full=LePP5;	At2g42810	GO:0005829,cytosol; GO:0005789,endoplasmic reticulum membrane; GO:0016021,integral component of membrane; GO:0031965,nuclear membrane; GO:0016607,nuclear speck; GO:0005634,nucleus; GO:0046872,metal ion binding; GO:0106306,NA; GO:0004722,protein serine/threonine phosphatase activity; GO:0106307,NA; GO:0003674,molecular_function; GO:0005488,binding; GO:0043167,ion binding; GO:0043169,cation binding…	PF00149.28:Calcineurin-like phosphoesterase	--	--	--
MS.gene56294	5265148	5265294	5264540	5264660	5267738	5267824	145,186,161	37,37,27	50,165,108	8,15,0	294	149	0.000158813	0.00741408	0.665,0.718,0.751	0.76,0.848,1.0	-0.158	down	chr3.1	5263709	5268663	-	--	--	K14945 protein quaking | (GenBank) RNA-binding KH domain protein (A)	--	XP_003598315.1	QKIL2_ARATH RecName: Full=KH domain-containing protein At5g56140; AltName: Full=Quaking-like protein 2;	At5g56140	GO:0005634,nucleus; GO:0003729,mRNA binding; GO:0048024,regulation of mRNA splicing, via spliceosome; GO:0003674,molecular_function; GO:0003676,nucleic acid binding; GO:0003723,RNA binding; GO:0005488,binding; GO:0097159,organic cyclic compound binding; GO:1901363,heterocyclic compound binding; GO:0000375,RNA splicing, via transesterification reactions; GO:0000377,RNA splicing, via transesterific…	PF16544.5:Homodimerisation region of STAR domain protein	--	--	--
MS.gene020278	13780961	13781011	13780577	13780651	13781121	13781203	69,116,38	2,8,2	150,3,105	0,0,0	198	149	0.000192219	0.00838514	0.963,0.916,0.935	1.0,1.0,1.0	-0.062	down	chr7.4	13778030	13783004	-	--	--	K08857 NIMA (never in mitosis gene a)-related kinase 1/4/5 [EC:2.7.11.1] | (GenBank) Serine/Threonine-kinase Nek4 (A)	--	XP_013449784.1	NEK2_ORYSJ RecName: Full=Serine/threonine-protein kinase Nek2 {ECO:0000305}; EC=2.7.11.1 {ECO:0000305}; AltName: Full=NimA-related protein kinase 2 {ECO:0000303|PubMed:17886359}; AltName: Full=OsNek2 {ECO:0000303|PubMed:17886359};	At1g54510	GO:0005524,ATP binding; GO:0106310,NA; GO:0004674,protein serine/threonine kinase activity; GO:0106311,NA; GO:0000166,nucleotide binding; GO:0003674,molecular_function; GO:0005488,binding; GO:0008144,drug binding; GO:0017076,purine nucleotide binding; GO:0030554,adenyl nucleotide binding; GO:0032553,ribonucleotide binding; GO:0032555,purine ribonucleotide binding; GO:0032559,adenyl ribonucleotide…	PF00069.25:Protein kinase domain	--	--	--
MS.gene90192	19474086	19474557	19473832	19473912	19475227	19475371	60,3,2	0,0,0	2,32,1	12,20,1	298	149	8.65974e-15	9.21743e-12	1.0,1.0,1.0	0.077,0.444,0.333	0.715	up	chr4.2	19472726	19476829	+	--	--	K05681 ATP-binding cassette, subfamily G (WHITE), member 2 | (RefSeq) ABC transporter, ATP-binding protein isoform 1 (A)	ko02010: ABC transporters	XP_003608431.1	ABCG1_PETHY RecName: Full=ABC transporter G family member 1 {ECO:0000303|PubMed:22345641}; Short=ABC transporter ABCG.1 {ECO:0000303|PubMed:22345641}; Short=PhABCG1 {ECO:0000303|PubMed:22345641};	At1g17840	GO:0016021,integral component of membrane; GO:0005886,plasma membrane; GO:0140359,NA; GO:0005524,ATP binding; GO:0010597,green leaf volatile biosynthetic process; GO:0055085,transmembrane transport; GO:0000166,nucleotide binding; GO:0003674,molecular_function; GO:0005488,binding; GO:0008144,drug binding; GO:0017076,purine nucleotide binding; GO:0030554,adenyl nucleotide binding; GO:0032553,ribonu…	PF01061.24:ABC-2 type transporter	--	--	--
MS.gene84195	33456732	33456882	33456088	33456162	33456982	33457202	567,797,496	0,0,0	2014,1501,1203	70,0,0	298	149	1.16318e-06	0.000143963	1.0,1.0,1.0	0.935,1.0,1.0	0.022	up	chr7.1	33453599	33457202	+	--	--	K23978 isoamyl acetate esterase [EC:3.1.1.112] | (GenBank) GDSL-like lipase/acylhydrolase (A)	--	XP_013449133.1	CPR49_ARATH RecName: Full=GDSL esterase/lipase CPRD49; EC=3.1.1.-; AltName: Full=Extracellular lipase CPRD49; Flags: Precursor;	At3g11210	GO:0005576,extracellular region; GO:0016787,hydrolase activity; GO:0016042,lipid catabolic process; GO:0003674,molecular_function; GO:0003824,catalytic activity; GO:0008152,metabolic process; GO:0006629,lipid metabolic process; GO:0008150,biological_process; GO:0009056,catabolic process; GO:0044238,primary metabolic process; GO:0071704,organic substance metabolic process; GO:1901575,organic subst…	PF13472.6:GDSL-like Lipase/Acylhydrolase family	--	--	--
MS.gene79523	88582733	88582811	88582169	88582274	88582957	88583050	4,1,188	0,0,13	1,4,25	0,0,0	226	149	0.000333804	0.0124231	1.0,1.0,0.905	1.0,1.0,1.0	-0.032	down	chr4.2	88580662	88586082	-	--	--	K18660 malonyl-CoA/methylmalonyl-CoA synthetase [EC:6.2.1.-] | (GenBank) fatty acyl-CoA synthetase family protein (A)	ko00061: Fatty acid biosynthesis; ko00280: Valine, leucine and isoleucine degradation; ko01100: Metabolic pathways; ko01212: Fatty acid metabolism	XP_013454725.1	CCL8_HUMLU RecName: Full=Probable CoA ligase CCL8 {ECO:0000305|PubMed:23300257}; Short=HlCCL8 {ECO:0000303|PubMed:23300257}; EC=6.2.1.- {ECO:0000305|PubMed:23300257};	At3g16170	GO:0003987,acetate-CoA ligase activity; GO:0003674,molecular_function; GO:0003824,catalytic activity; GO:0016405,CoA-ligase activity; GO:0016874,ligase activity; GO:0016877,ligase activity, forming carbon-sulfur bonds; GO:0016878,acid-thiol ligase activity	PF00501.28:AMP-binding enzyme	--	--	--
MS.gene24227	1810602	1810725	1808992	1809079	1811057	1811207	127,90,87	5,0,6	244,114,336	0,0,0	271	149	0.000546424	0.019132	0.933,1.0,0.889	1.0,1.0,1.0	-0.059	down	chr1.2	1808993	1811207	+	--	--	K03671 thioredoxin 1 | (GenBank) thioredoxin H-type 1 protein (A)	--	AUS45886.1	TRXH_RICCO RecName: Full=Thioredoxin H-type; Short=Trx-H;	At3g51030	GO:0005737,cytoplasm; GO:0005622,intracellular; GO:0005575,cellular_component; GO:0005623,cell; GO:0044424,intracellular part; GO:0044464,cell part	PF00085.20:Thioredoxin	--	--	--
MS.gene84700	80883418	80883530	80881302	80881478	80884068	80884539	1243,1266,502	27,114,21	315,961,1013	0,2,0	260	149	0	0	0.963,0.864,0.932	1.0,0.996,1.0	-0.079	down	chr3.4	80880966	80885139	+	--	--	--	--	XP_003601926.1	GCL1_ARATH RecName: Full=LanC-like protein GCL1; AltName: Full=G protein-coupled receptor 2-like protein 1; Short=Protein GCR2-like 1;	At5g65280	GO:0019898,extrinsic component of membrane; GO:0005886,plasma membrane; GO:0005975,carbohydrate metabolic process; GO:0008152,metabolic process; GO:0008150,biological_process; GO:0044238,primary metabolic process; GO:0071704,organic substance metabolic process; GO:0005575,cellular_component; GO:0016020,membrane; GO:0044425,membrane part; GO:0005623,cell; GO:0044464,cell part; GO:0071944,cell peri…	PF05147.13:Lanthionine synthetase C-like protein	--	--	--
MS.gene37074	39721210	39721265	39718649	39719400	39722218	39722285	226,210,108	25,5,18	278,89,230	6,0,1	203	149	1.79569e-09	6.37111e-07	0.869,0.969,0.815	0.971,1.0,0.994	-0.104	down	chr1.4	39718650	39722285	-	--	--	K00963 UTP--glucose-1-phosphate uridylyltransferase [EC:2.7.7.9] | (RefSeq) UTP--glucose-1-phosphate uridylyltransferase-like (A)	ko00040: Pentose and glucuronate interconversions; ko00052: Galactose metabolism; ko00500: Starch and sucrose metabolism; ko00520: Amino sugar and nucleotide sugar metabolism; ko01100: Metabolic pathways; ko01110: Biosynthesis of secondary metabolites; ko01240: Biosynthesis of cofactors	XP_013467665.1	C3H14_ORYSJ RecName: Full=Zinc finger CCCH domain-containing protein 14; Short=OsC3H14;	At5g06770	GO:0005737,cytoplasm; GO:0005634,nucleus; GO:0003677,DNA binding; GO:0046872,metal ion binding; GO:0003729,mRNA binding; GO:0010468,regulation of gene expression; GO:0003674,molecular_function; GO:0003676,nucleic acid binding; GO:0005488,binding; GO:0097159,organic cyclic compound binding; GO:1901363,heterocyclic compound binding; GO:0043167,ion binding; GO:0043169,cation binding; GO:0003723,RNA …	PF00642.24:Zinc finger C-x8-C-x5-C-x3-H type (and similar)	C3H	TF	C3H
MS.gene37450	91216521	91216638	91215993	91216089	91217079	91217178	17,4,50	0,2,21	1,5,1	0,0,0	265	149	6.49043e-06	0.000579405	1.0,0.529,0.572	1.0,1.0,1.0	-0.3	down	chr3.4	91214345	91221751	-	--	--	K00826 branched-chain amino acid aminotransferase [EC:2.6.1.42] | (GenBank) branched-chain amino acid aminotransferase (A)	ko00270: Cysteine and methionine metabolism; ko00280: Valine, leucine and isoleucine degradation; ko00290: Valine, leucine and isoleucine biosynthesis; ko00770: Pantothenate and CoA biosynthesis; ko00966: Glucosinolate biosynthesis; ko01100: Metabolic pathways; ko01110: Biosynthesis of secondary metabolites; ko01210: 2-Oxocarboxylic acid metabolism; ko01230: Biosynthesis of amino acids; ko01240: …	XP_013461828.1	BCAT2_ARATH RecName: Full=Branched-chain-amino-acid aminotransferase 2, chloroplastic; Short=Atbcat-2; EC=2.6.1.42; Flags: Precursor;	At1g10070	GO:0009507,chloroplast; GO:0005829,cytosol; GO:0004084,branched-chain-amino-acid transaminase activity; GO:0052656,L-isoleucine transaminase activity; GO:0052654,L-leucine transaminase activity; GO:0050048,L-leucine:2-oxoglutarate aminotransferase activity; GO:0052655,L-valine transaminase activity; GO:0009097,isoleucine biosynthetic process; GO:0009098,leucine biosynthetic process; GO:0071669,pl…	PF01063.19:Amino-transferase class IV	--	--	--
MS.gene002389	71762893	71763010	71762282	71762339	71763134	71763197	4,33,10	0,1,10	48,81,27	0,0,0	265	149	0.000529575	0.0186649	1.0,0.949,0.36	1.0,1.0,1.0	-0.23	down	chr2.4	71762283	71767319	+	--	--	K19995 secretory carrier-associated membrane protein | (GenBank) secretory carrier-associated membrane protein (A)	--	XP_003593475.1	SCAM_PEA RecName: Full=Secretory carrier-associated membrane protein; Short=Secretory carrier membrane protein;	At1g11180	GO:0016021,integral component of membrane; GO:0005886,plasma membrane; GO:0030658,transport vesicle membrane; GO:0015031,protein transport; GO:0008104,protein localization; GO:0006810,transport; GO:0008150,biological_process; GO:0015833,peptide transport; GO:0033036,macromolecule localization; GO:0042886,amide transport; GO:0045184,establishment of protein localization; GO:0051179,localization; G…	PF04144.13:SCAMP family	--	--	--
MS.gene72343	21025357	21025435	21024970	21025021	21025566	21025704	315,95,59	10,24,13	121,224,128	0,0,1	226	149	3.43059e-13	3.04293e-10	0.954,0.723,0.75	1.0,1.0,0.988	-0.187	down	chr8.3	21024343	21027051	-	--	--	K22763 deubiquitinase DESI2 [EC:3.4.19.12] | (Kazusa) Lj2g3v1989220.3; - (A)	--	XP_003608666.1	NUDT8_ARATH RecName: Full=Nudix hydrolase 8; Short=AtNUDT8; EC=3.6.1.-;	At5g47240	GO:0005829,cytosol; GO:0047631,ADP-ribose diphosphatase activity; GO:0046872,metal ion binding; GO:0051287,NAD binding; GO:0035529,NADH pyrophosphatase activity; GO:0009611,response to wounding; GO:0003674,molecular_function; GO:0003824,catalytic activity; GO:0016462,pyrophosphatase activity; GO:0016787,hydrolase activity; GO:0016817,hydrolase activity, acting on acid anhydrides; GO:0016818,hydro…	PF18290.1:Nudix hydrolase domain	--	--	--
MS.gene028923	10411496	10411732	10410912	10411162	10411916	10412087	2,174,74	0,18,0	85,158,196	0,0,0	298	149	3.02542e-07	4.47258e-05	1.0,0.829,1.0	1.0,1.0,1.0	-0.057	down	chr2.3	10410913	10413207	-	--	--	K08726 soluble epoxide hydrolase / lipid-phosphate phosphatase [EC:3.3.2.10 3.1.3.76] | (RefSeq) uncharacterized protein LOC110941524 (A)	ko00590: Arachidonic acid metabolism; ko01100: Metabolic pathways; ko04146: Peroxisome	XP_013465074.1	--	At4g02340	GO:0004301,epoxide hydrolase activity; GO:0016787,hydrolase activity; GO:0003674,molecular_function; GO:0003824,catalytic activity; GO:0016801,hydrolase activity, acting on ether bonds; GO:0016803,ether hydrolase activity	PF00561.20:alpha/beta hydrolase fold	--	--	--
MS.gene46435	44427241	44427346	44425790	44426096	44427487	44427799	39,50,18	0,0,0	50,38,57	0,9,0	253	149	0.00168524	0.0477068	1.0,1.0,1.0	1.0,0.713,1.0	0.096	up	chr1.2	44425791	44427799	+	--	--	--	--	XP_003590316.1	--	At3g44150	GO:0005829,cytosol; GO:0005634,nucleus; GO:0046872,metal ion binding; GO:0017183,peptidyl-diphthamide biosynthetic process from peptidyl-histidine; GO:0002098,tRNA wobble uridine modification; GO:0003674,molecular_function; GO:0005488,binding; GO:0043167,ion binding; GO:0043169,cation binding; GO:0008152,metabolic process; GO:0002181,cytoplasmic translation; GO:0002182,cytoplasmic translational e…	--	--	--	--
MS.gene96881	43653980	43654102	43653278	43653455	43654302	43654421	76,60,21	0,1,8	353,230,132	0,0,0	270	149	0.00123636	0.0373859	1.0,0.971,0.592	1.0,1.0,1.0	-0.146	down	chr7.3	43651405	43656667	-	--	--	K20456 oxysterol-binding protein 1 | (RefSeq) oxysterol-binding protein-like protein (A)	--	XP_013448863.1	ORP3A_ARATH RecName: Full=Oxysterol-binding protein-related protein 3A; AltName: Full=OSBP-related protein 3A; AltName: Full=Protein UNFERTILIZED EMBRYO SAC 18;	At5g02100	GO:0005829,cytosol; GO:0005783,endoplasmic reticulum; GO:0005794,Golgi apparatus; GO:0043231,intracellular membrane-bounded organelle; GO:0016020,membrane; GO:0005886,plasma membrane; GO:0032934,sterol binding; GO:0015248,sterol transporter activity; GO:0009567,double fertilization forming a zygote and endosperm; GO:0003674,molecular_function; GO:0005488,binding; GO:0005496,steroid binding; GO:00…	PF01237.18:Oxysterol-binding protein	--	--	--
MS.gene07819	72308479	72308543	72308313	72308398	72308630	72308692	27,11,18	0,0,13	8,6,39	0,0,0	212	149	0.000951322	0.0299582	1.0,1.0,0.493	1.0,1.0,1.0	-0.169	down	chr8.3	72306470	72311179	-	--	--	K02218 casein kinase 1 [EC:2.7.11.1] | (GenBank) casein kinase I-like protein (A)	--	XP_003627159.1	CKL2_ARATH RecName: Full=Casein kinase 1-like protein 2 {ECO:0000305}; EC=2.7.11.1 {ECO:0000305}; AltName: Full=Protein CASEIN KINASE I-LIKE 2 {ECO:0000303|PubMed:16126836};	At1g72710	GO:0005737,cytoplasm; GO:0005634,nucleus; GO:0005886,plasma membrane; GO:0005524,ATP binding; GO:0106310,NA; GO:0004674,protein serine/threonine kinase activity; GO:0106311,NA; GO:0006897,endocytosis; GO:0018105,peptidyl-serine phosphorylation; GO:0000166,nucleotide binding; GO:0003674,molecular_function; GO:0005488,binding; GO:0008144,drug binding; GO:0017076,purine nucleotide binding; GO:003055…	PF00069.25:Protein kinase domain	--	--	--
MS.gene79880	65581731	65581803	65581363	65581435	65582107	65582179	17,35,52	0,0,0	47,61,15	2,20,3	220	149	2.64424e-08	5.24463e-06	1.0,1.0,1.0	0.941,0.674,0.772	0.204	up	chr3.1	65575005	65583310	+	--	--	--	--	XP_003601656.2	--	At3g07280	--	--	--	--	--
MS.gene015215	9718658	9718760	9718207	9718530	9720468	9721819	132,64,75	12,0,0	117,238,281	0,0,0	250	149	0.000190829	0.00838514	0.868,1.0,1.0	1.0,1.0,1.0	-0.044	down	chr5.4	9718208	9721819	+	--	--	K14487 auxin responsive GH3 gene family | (GenBank) indole-3-acetic acid-amido synthetase (A)	ko04075: Plant hormone signal transduction	XP_003611653.1	GH31_ARATH RecName: Full=Probable indole-3-acetic acid-amido synthetase GH3.1; EC=6.3.2.-; AltName: Full=Auxin-responsive GH3-like protein 1; Short=AtGH3-1;	At2g14960	GO:0005737,cytoplasm; GO:0016881,acid-amino acid ligase activity; GO:0009733,response to auxin; GO:0003674,molecular_function; GO:0003824,catalytic activity; GO:0016874,ligase activity; GO:0016879,ligase activity, forming carbon-nitrogen bonds; GO:0008150,biological_process; GO:0009719,response to endogenous stimulus; GO:0009725,response to hormone; GO:0010033,response to organic substance; GO:00…	PF03321.13:GH3 auxin-responsive promoter	--	--	--
MS.gene046151	79302978	79303112	79302486	79302512	79303949	79304069	4,6,6	8,0,2	1,1,14	0,0,0	282	149	1.05896e-05	0.000812927	0.209,1.0,0.613	1.0,1.0,1.0	-0.393	down	chr1.3	79302058	79304923	-	--	--	K16546 FGFR1 oncogene partner | (GenBank) tonneau protein 1b (A)	--	XP_003592805.1	TON1B_ARATH RecName: Full=Protein TONNEAU 1b;	At3g55000	GO:0030981,cortical microtubule cytoskeleton; GO:0005737,cytoplasm; GO:0005886,plasma membrane; GO:0030865,cortical cytoskeleton organization; GO:0000226,microtubule cytoskeleton organization; GO:0000913,preprophase band assembly; GO:0007010,cytoskeleton organization; GO:0006996,organelle organization; GO:0008150,biological_process; GO:0009987,cellular process; GO:0016043,cellular component organ…	PF16045.5:LisH	--	--	--
MS.gene04334	56354828	56354882	56354423	56354483	56356234	56356309	44,24,52	1,13,3	14,80,6	0,0,0	202	149	7.17798e-06	0.000626193	0.97,0.577,0.927	1.0,1.0,1.0	-0.175	down	chr3.4	56353015	56357619	-	--	--	K02433 aspartyl-tRNA(Asn)/glutamyl-tRNA(Gln) amidotransferase subunit A [EC:6.3.5.6 6.3.5.7] | (RefSeq) Glutamyl-tRNA(Gln) amidotransferase subunit A (A)	ko00970: Aminoacyl-tRNA biosynthesis; ko01100: Metabolic pathways	XP_003600390.2	SFH3_ARATH RecName: Full=Phosphatidylinositol/phosphatidylcholine transfer protein SFH3; AltName: Full=Protein SEC FOURTEEN HOMOLOGS 3; Short=AtSFH3;	At1g55840	GO:0000139,Golgi membrane; GO:0005886,plasma membrane; GO:0009908,flower development; GO:0015031,protein transport; GO:0000003,reproduction; GO:0003006,developmental process involved in reproduction; GO:0007275,multicellular organism development; GO:0008150,biological_process; GO:0009791,post-embryonic development; GO:0022414,reproductive process; GO:0032501,multicellular organismal process; GO:0…	PF00650.20:CRAL/TRIO domain	--	--	--
MS.gene072263	74997838	74997895	74997539	74997636	74998065	74998239	13,27,29	0,17,4	21,78,26	0,0,0	205	149	2.81033e-07	4.27331e-05	1.0,0.536,0.84	1.0,1.0,1.0	-0.208	down	chr8.3	74995103	74998239	+	--	--	--	--	XP_003626989.1	--	--	GO:0016021,integral component of membrane; GO:0005575,cellular_component; GO:0016020,membrane; GO:0031224,intrinsic component of membrane; GO:0044425,membrane part	--	--	--	--
MS.gene54634	3003809	3004006	3003353	3003475	3004107	3004282	141,240,264	0,6,12	94,27,107	0,1,0	298	149	0.000886719	0.0286007	1.0,0.952,0.917	1.0,0.931,1.0	-0.021	down	chr6.1	3001471	3005102	+	--	--	K01968 3-methylcrotonyl-CoA carboxylase alpha subunit [EC:6.4.1.4] | (RefSeq) methylcrotonoyl-CoA carboxylase subunit alpha, mitochondrial (A)	ko00280: Valine, leucine and isoleucine degradation; ko01100: Metabolic pathways	XP_013450813.1	STY13_ARATH RecName: Full=Serine/threonine-protein kinase STY13 {ECO:0000305}; EC=2.7.11.1 {ECO:0000269|PubMed:16429265}; AltName: Full=AtSTYPK {ECO:0000303|PubMed:17291444}; AltName: Full=Serine/threonine/tyrosine-protein kinase 13 {ECO:0000303|PubMed:16429265};	At3g01490	GO:0005737,cytoplasm; GO:0005886,plasma membrane; GO:0005524,ATP binding; GO:0004672,protein kinase activity; GO:0106310,NA; GO:0004674,protein serine/threonine kinase activity; GO:0004712,protein serine/threonine/tyrosine kinase activity; GO:0106311,NA; GO:0004713,protein tyrosine kinase activity; GO:0006468,protein phosphorylation; GO:0045995,regulation of embryonic development; GO:0010344,seed…	PF07714.17:Protein tyrosine kinase	--	--	--
MS.gene54327	69707409	69707683	69706842	69707093	69717407	69717638	4,4,4	3,4,2	11,201,12	4,0,1	298	149	8.39373e-06	0.000697991	0.4,0.333,0.5	0.579,1.0,0.857	-0.401	down	chr2.3	69706843	69718006	-	--	--	K01206 alpha-L-fucosidase [EC:3.2.1.51] | (RefSeq) FXG1; alpha-fucosidase 1 (A)	ko00511: Other glycan degradation	XP_003593736.1	GDL8_ARATH RecName: Full=GDSL esterase/lipase At1g28590; EC=3.1.1.-; AltName: Full=Extracellular lipase At1g28590; Flags: Precursor;	At1g28590	GO:0005576,extracellular region; GO:0016788,hydrolase activity, acting on ester bonds; GO:0016042,lipid catabolic process; GO:0003674,molecular_function; GO:0003824,catalytic activity; GO:0016787,hydrolase activity; GO:0008152,metabolic process; GO:0006629,lipid metabolic process; GO:0008150,biological_process; GO:0009056,catabolic process; GO:0044238,primary metabolic process; GO:0071704,organic…	PF00657.22:GDSL-like Lipase/Acylhydrolase	--	--	--
MS.gene90842	87660449	87660509	87660135	87660169	87660660	87660761	135,109,81	4,0,14	73,108,101	0,0,1	208	149	2.98428e-05	0.00189075	0.96,1.0,0.806	1.0,1.0,0.986	-0.073	down	chr1.4	87658595	87664019	-	--	--	K12373 hexosaminidase [EC:3.2.1.52] | (GenBank) glycoside hydrolase family 20 domain protein (A)	ko00511: Other glycan degradation; ko00513: Various types of N-glycan biosynthesis; ko00520: Amino sugar and nucleotide sugar metabolism; ko00531: Glycosaminoglycan degradation; ko00603: Glycosphingolipid biosynthesis - globo and isoglobo series; ko00604: Glycosphingolipid biosynthesis - ganglio series; ko01100: Metabolic pathways	XP_013470457.1	HEXO1_ARATH RecName: Full=Beta-hexosaminidase 1; EC=3.2.1.52; AltName: Full=Beta-GlcNAcase 1; AltName: Full=Beta-N-acetylhexosaminidase 1; AltName: Full=Beta-hexosaminidase 2; Short=AtHEX2; AltName: Full=N-acetyl-beta-glucosaminidase 1; Flags: Precursor;	At3g55260	GO:0005829,cytosol; GO:0099503,secretory vesicle; GO:0005773,vacuole; GO:0004563,beta-N-acetylhexosaminidase activity; GO:0015929,hexosaminidase activity; GO:0102148,N-acetyl-beta-D-galactosaminidase activity; GO:0005975,carbohydrate metabolic process; GO:0003674,molecular_function; GO:0003824,catalytic activity; GO:0004553,hydrolase activity, hydrolyzing O-glycosyl compounds; GO:0016787,hydrolas…	PF00728.22:Glycosyl hydrolase family 20, catalytic domain	--	--	--
MS.gene47653	75817838	75817954	75817417	75817455	75818736	75818836	19,12,21	3,5,0	4,15,18	0,0,0	264	149	4.94725e-05	0.0028311	0.781,0.575,1.0	1.0,1.0,1.0	-0.215	down	chr5.2	75815571	75820894	+	--	--	--	--	XP_003617235.2	CLT1_ARATH RecName: Full=Protein CLT1, chloroplastic {ECO:0000303|PubMed:20080670}; AltName: Full=CRT-like transporter 1 {ECO:0000303|PubMed:20080670}; AltName: Full=Chloroquine-resistance transporter-like transporter 1 {ECO:0000303|PubMed:20080670}; Flags: Precursor;	At5g12170	GO:0031969,chloroplast membrane; GO:0016021,integral component of membrane; GO:0005622,intracellular; GO:0005575,cellular_component; GO:0016020,membrane; GO:0005623,cell; GO:0005737,cytoplasm; GO:0043231,intracellular membrane-bounded organelle; GO:0009507,chloroplast; GO:0009526,plastid envelope; GO:0009536,plastid; GO:0009941,chloroplast envelope; GO:0031090,organelle membrane; GO:0031967,organ…	PF08627.10:CRT-like, chloroquine-resistance transporter-like	--	--	--
MS.gene46376	21707114	21707360	21706424	21706619	21709307	21709409	27,19,25	0,9,8	9,22,92	1,0,0	298	149	1.59461e-06	0.000188589	1.0,0.514,0.61	0.818,1.0,1.0	-0.231	down	chr8.3	21697847	21709951	+	--	--	K01338 ATP-dependent Lon protease [EC:3.4.21.53] | (GenBank) lon-related ATP-dependent protease, putative (A)	--	XP_013457545.1	LONP2_ARATH RecName: Full=Lon protease homolog 2, peroxisomal {ECO:0000255|HAMAP-Rule:MF_03121}; EC=3.4.21.53 {ECO:0000255|HAMAP-Rule:MF_03121};	At5g47040	GO:0070013,intracellular organelle lumen; GO:0005782,peroxisomal matrix; GO:0005777,peroxisome; GO:0005524,ATP binding; GO:0004176,ATP-dependent peptidase activity; GO:0004252,serine-type endopeptidase activity; GO:0048527,lateral root development; GO:0016560,protein import into peroxisome matrix, docking; GO:0016485,protein processing; GO:0006515,protein quality control for misfolded or incomple…	PF05362.13:Lon protease (S16) C-terminal proteolytic domain	--	--	--
MS.gene88016	69883042	69883175	69882764	69882870	69884492	69884657	127,116,84	10,33,5	136,121,110	2,2,0	281	149	2.03144e-09	6.75708e-07	0.871,0.651,0.899	0.973,0.97,1.0	-0.174	down	chr4.3	69881189	69884657	+	--	--	--	--	XP_003605367.1	--	At4g10140	GO:0016021,integral component of membrane; GO:0043231,intracellular membrane-bounded organelle; GO:0005575,cellular_component; GO:0016020,membrane; GO:0031224,intrinsic component of membrane; GO:0044425,membrane part; GO:0005622,intracellular; GO:0005623,cell; GO:0043226,organelle; GO:0043227,membrane-bounded organelle; GO:0043229,intracellular organelle; GO:0044424,intracellular part; GO:0044464…	PF09835.9:Uncharacterized protein conserved in bacteria (DUF2062)	--	--	--
MS.gene008138	69405927	69406073	69405057	69405153	69406645	69406865	15,32,23	0,6,1	6,17,14	0,0,0	294	149	0.001023	0.0318385	1.0,0.73,0.921	1.0,1.0,1.0	-0.116	down	chr3.4	69403739	69407148	+	--	--	K23948 NADH:quinone reductase (non-electrogenic) [EC:1.6.5.9] | (RefSeq) hypothetical protein (A)	--	XP_003600771.1	--	At5g64250	GO:0051213,dioxygenase activity; GO:0004318,enoyl-[acyl-carrier-protein] reductase (NADH) activity; GO:0016631,enoyl-[acyl-carrier-protein] reductase activity; GO:0018580,nitronate monooxygenase activity; GO:0003674,molecular_function; GO:0003824,catalytic activity; GO:0016491,oxidoreductase activity; GO:0004312,fatty acid synthase activity; GO:0016627,oxidoreductase activity, acting on the CH-CH…	PF03060.15:Nitronate monooxygenase	--	--	--
MS.gene33758	23560810	23560901	23559316	23559522	23561245	23561293	56,81,86	0,0,14	33,47,27	0,0,0	239	149	0.000206119	0.00891842	1.0,1.0,0.793	1.0,1.0,1.0	-0.069	down	chr4.4	23559317	23568339	+	--	--	K03217 YidC/Oxa1 family membrane protein insertase | (GenBank) 60 kDa inner membrane protein (A)	ko03060: Protein export	XP_013457089.1	OXA1_ARATH RecName: Full=Mitochondrial inner membrane protein OXA1; AltName: Full=Oxidase assembly 1 protein; Short=AtOXA1; Flags: Precursor;	At5g62050	GO:0031305,integral component of mitochondrial inner membrane; GO:0005743,mitochondrial inner membrane; GO:0005739,mitochondrion; GO:0032977,membrane insertase activity; GO:0033617,mitochondrial respiratory chain complex IV assembly; GO:0051205,protein insertion into membrane; GO:0032979,protein insertion into mitochondrial inner membrane from matrix side; GO:0003674,molecular_function; GO:000521…	PF02096.20:60Kd inner membrane protein	--	--	--
MS.gene04827	13249862	13249936	13249530	13249589	13250558	13250645	25,17,2	0,10,0	2,4,28	0,0,0	222	149	0.000807761	0.0267013	1.0,0.533,1.0	1.0,1.0,1.0	-0.156	down	chr7.4	13247828	13251993	+	--	--	K17065 dynamin 1-like protein [EC:3.6.5.5] | (RefSeq) hypothetical protein (A)	--	XP_013449826.1	--	At1g03030	GO:0005737,cytoplasm; GO:0005524,ATP binding; GO:0016787,hydrolase activity; GO:0016301,kinase activity; GO:0000166,nucleotide binding; GO:0003674,molecular_function; GO:0005488,binding; GO:0008144,drug binding; GO:0017076,purine nucleotide binding; GO:0030554,adenyl nucleotide binding; GO:0032553,ribonucleotide binding; GO:0032555,purine ribonucleotide binding; GO:0032559,adenyl ribonucleotide b…	PF00485.18:Phosphoribulokinase / Uridine kinase family	--	--	--
MS.gene050523	2492464	2492665	2492095	2492266	2492913	2493086	394,239,123	0,0,0	750,908,805	34,0,2	298	149	0.000331148	0.0124111	1.0,1.0,1.0	0.917,1.0,0.995	0.029	up	chr7.4	2491923	2494699	+	--	--	K01456 peptide-N4-(N-acetyl-beta-glucosaminyl)asparagine amidase [EC:3.5.1.52] | (RefSeq) peptide-N(4)-(N-acetyl-beta- glucosaminyl)asparagine amidase-like (A)	ko04141: Protein processing in endoplasmic reticulum	XP_003626441.2	AKR1_SOYBN RecName: Full=Probable aldo-keto reductase 1; Short=GmAKR1; EC=1.1.1.-;	At1g60690	GO:0047834,D-threo-aldose 1-dehydrogenase activity; GO:0003674,molecular_function; GO:0003824,catalytic activity; GO:0016491,oxidoreductase activity; GO:0016614,oxidoreductase activity, acting on CH-OH group of donors; GO:0016616,oxidoreductase activity, acting on the CH-OH group of donors, NAD or NADP as acceptor	PF00248.21:Aldo/keto reductase family	--	--	--
MS.gene00204	57909743	57909994	57909217	57909495	57910280	57910427	123,77,106	10,2,9	68,129,85	0,0,4	298	149	8.69334e-05	0.0046266	0.86,0.951,0.855	1.0,1.0,0.914	-0.083	down	chr2.1	57905139	57910427	-	--	--	--	--	XP_003594810.1	--	At5g49320	GO:0016021,integral component of membrane; GO:0005575,cellular_component; GO:0016020,membrane; GO:0031224,intrinsic component of membrane; GO:0044425,membrane part	PF06749.12:Protein of unknown function (DUF1218)	--	--	--
MS.gene72724	16460107	16460393	16459433	16459589	16460794	16460911	81,140,74	6,16,12	60,135,127	1,3,0	298	149	7.09987e-09	1.79931e-06	0.871,0.814,0.755	0.968,0.957,1.0	-0.162	down	chr5.4	16458815	16462285	-	--	--	K17500 integrin-linked kinase-associated serine/threonine phosphatase 2C [EC:3.1.3.16] | (RefSeq) WAT1-related protein At3g18200-like (A)	--	XP_003612466.2	WTR35_ARATH RecName: Full=WAT1-related protein At4g19185;	At5g45370	GO:0005794,Golgi apparatus; GO:0016021,integral component of membrane; GO:0005886,plasma membrane; GO:0022857,transmembrane transporter activity; GO:0003674,molecular_function; GO:0005215,transporter activity; GO:0005622,intracellular; GO:0005575,cellular_component; GO:0005623,cell; GO:0005737,cytoplasm; GO:0043231,intracellular membrane-bounded organelle; GO:0012505,endomembrane system; GO:00432…	PF00892.20:EamA-like transporter family	--	--	--
MS.gene03225	81672545	81672695	81671893	81672136	81672772	81672920	3,1,0	0,3,1	13,7,3	0,0,0	298	149	0.00055189	0.0191971	1.0,0.143,0.0	1.0,1.0,1.0	-0.619	down	chr3.4	81671894	81675422	-	--	--	K13430 serine/threonine-protein kinase PBS1 [EC:2.7.11.1] | (RefSeq) serine/threonine-protein kinase PBS1-like (A)	ko04626: Plant-pathogen interaction	XP_013461319.1	PERK9_ARATH RecName: Full=Proline-rich receptor-like protein kinase PERK9; EC=2.7.11.1; AltName: Full=Proline-rich extensin-like receptor kinase 9; Short=AtPERK9;	At1g77280	GO:0016021,integral component of membrane; GO:0005886,plasma membrane; GO:0005524,ATP binding; GO:0019901,protein kinase binding; GO:0106310,NA; GO:0106311,NA; GO:0071456,cellular response to hypoxia; GO:0006468,protein phosphorylation; GO:0000166,nucleotide binding; GO:0003674,molecular_function; GO:0005488,binding; GO:0008144,drug binding; GO:0017076,purine nucleotide binding; GO:0030554,adenyl…	PF00069.25:Protein kinase domain	--	--	--
MS.gene009079	38581041	38581158	38580567	38580614	38581436	38581556	148,80,155	4,3,6	40,159,143	0,0,0	265	149	0.00031094	0.0119052	0.954,0.937,0.936	1.0,1.0,1.0	-0.058	down	chr8.1	38578716	38585630	+	--	--	K09680 type II pantothenate kinase [EC:2.7.1.33] | (GenBank) pantothenate kinase (A)	ko00770: Pantothenate and CoA biosynthesis; ko01100: Metabolic pathways; ko01240: Biosynthesis of cofactors	XP_013446004.1	PANK2_ORYSJ RecName: Full=Pantothenate kinase 2 {ECO:0000250|UniProtKB:Q8L5Y9}; AltName: Full=Pantothenic acid kinase 2 {ECO:0000250|UniProtKB:Q8L5Y9}; Includes: RecName: Full=Pantothenate kinase {ECO:0000250|UniProtKB:Q8L5Y9}; EC=2.7.1.33 {ECO:0000250|UniProtKB:Q8L5Y9}; Includes: RecName: Full=4'-phosphopantetheine phosphatase {ECO:0000250|UniProtKB:Q8L5Y9}; EC=3.1.3.- {ECO:0000250|UniProtKB:Q8L…	At4g32180_1	GO:0005829,cytosol; GO:0005634,nucleus; GO:0005524,ATP binding; GO:0016787,hydrolase activity; GO:0046872,metal ion binding; GO:0004594,pantothenate kinase activity; GO:0015937,coenzyme A biosynthetic process; GO:0000166,nucleotide binding; GO:0003674,molecular_function; GO:0005488,binding; GO:0008144,drug binding; GO:0017076,purine nucleotide binding; GO:0030554,adenyl nucleotide binding; GO:003…	PF03630.14:Fumble	--	--	--
MS.gene073799	47015281	47015422	47012768	47013053	47015853	47016126	55,34,53	1,1,7	41,25,136	0,0,0	289	149	0.000239042	0.0097716	0.966,0.946,0.796	1.0,1.0,1.0	-0.097	down	chr1.3	47012769	47016617	+	--	--	K00939 adenylate kinase [EC:2.7.4.3] | (GenBank) adenylate kinase (A)	ko00230: Purine metabolism; ko00730: Thiamine metabolism; ko01100: Metabolic pathways; ko01110: Biosynthesis of secondary metabolites; ko01240: Biosynthesis of cofactors	XP_013468262.1	KAD1_ORYSJ RecName: Full=Probable adenylate kinase 1, chloroplastic; EC=2.7.4.3; AltName: Full=Adenylate monophosphate kinase 1; Flags: Precursor;	At2g37250	GO:0009570,chloroplast stroma; GO:0005737,cytoplasm; GO:0005739,mitochondrion; GO:0005634,nucleus; GO:0004017,adenylate kinase activity; GO:0005524,ATP binding; GO:0008652,cellular amino acid biosynthetic process; GO:0048364,root development; GO:0048367,shoot system development; GO:0003674,molecular_function; GO:0003824,catalytic activity; GO:0016301,kinase activity; GO:0016740,transferase activi…	PF00406.22:Adenylate kinase	--	--	--
MS.gene60310	18673157	18673958	18672201	18672362	18674061	18674278	149,280,330	0,10,8	172,149,276	0,0,0	298	149	0.000137721	0.00660318	1.0,0.933,0.954	1.0,1.0,1.0	-0.038	down	chr8.2	18671999	18676420	+	--	--	--	--	XP_013457859.1	HIPL1_ARATH RecName: Full=HIPL1 protein; Flags: Precursor;	At1g74790	GO:0031225,anchored component of membrane; GO:0046658,anchored component of plasma membrane; GO:0005739,mitochondrion; GO:0005886,plasma membrane; GO:0016491,oxidoreductase activity; GO:0003674,molecular_function; GO:0003824,catalytic activity; GO:0005575,cellular_component; GO:0016020,membrane; GO:0031224,intrinsic component of membrane; GO:0044425,membrane part; GO:0005623,cell; GO:0031226,intr…	PF07995.11:Glucose / Sorbosone dehydrogenase	--	--	--
MS.gene99915	57437258	57437376	57436940	57437164	57437461	57437806	2,71,39	0,6,2	16,69,33	0,0,0	266	149	0.00087454	0.0283799	1.0,0.869,0.916	1.0,1.0,1.0	-0.072	down	chr4.2	57435034	57438192	-	--	--	K14497 protein phosphatase 2C [EC:3.1.3.16] | (RefSeq) NtPP2C2, PP2C2; protein phosphatase 2C 37-like (A)	ko04016: MAPK signaling pathway - plant; ko04075: Plant hormone signal transduction	XP_003605716.1	P2C52_ARATH RecName: Full=Probable protein phosphatase 2C 52; Short=AtPP2C52; EC=3.1.3.16;	At1g03590	GO:0005829,cytosol; GO:0005634,nucleus; GO:0005886,plasma membrane; GO:0046872,metal ion binding; GO:0004721,phosphoprotein phosphatase activity; GO:0106306,NA; GO:0106307,NA; GO:0006470,protein dephosphorylation; GO:0003674,molecular_function; GO:0005488,binding; GO:0043167,ion binding; GO:0043169,cation binding; GO:0003824,catalytic activity; GO:0016787,hydrolase activity; GO:0016788,hydrolase …	PF00481.21:Protein phosphatase 2C	--	--	--
MS.gene79631	88426319	88426435	88425784	88425929	88428581	88428813	171,178,215	1,10,14	88,32,99	0,0,0	264	149	7.44445e-06	0.000628879	0.99,0.909,0.897	1.0,1.0,1.0	-0.068	down	chr7.3	88424346	88428813	-	--	--	K23953 plant cysteine oxidase [EC:1.13.11.-] | (GenBank) 2-aminoethanethiol dioxygenase-like protein (A)	--	XP_003621141.2	PCO2_ARATH RecName: Full=Plant cysteine oxidase 2 {ECO:0000303|PubMed:24599061}; Short=AtPCO2 {ECO:0000303|PubMed:33207269}; EC=1.13.11.20 {ECO:0000269|PubMed:24599061, ECO:0000269|PubMed:29848548, ECO:0000269|PubMed:33207269}; AltName: Full=Hypoxia-responsive unknown protein 43 {ECO:0000303|PubMed:20097791};	At5g39890	GO:0005829,cytosol; GO:0005634,nucleus; GO:0017172,cysteine dioxygenase activity; GO:0046872,metal ion binding; GO:0071456,cellular response to hypoxia; GO:0070483,detection of hypoxia; GO:0018171,peptidyl-cysteine oxidation; GO:0001666,response to hypoxia; GO:0003674,molecular_function; GO:0003824,catalytic activity; GO:0016491,oxidoreductase activity; GO:0016701,oxidoreductase activity, acting …	PF07847.12:PCO_ADO	--	--	--
MS.gene006903	25840473	25840556	25840253	25840368	25841195	25841760	48,9,22	4,13,11	43,79,12	5,3,0	231	149	0.000447787	0.0162117	0.886,0.309,0.563	0.847,0.944,1.0	-0.344	down	chr4.2	25838156	25842316	+	--	--	K17279 receptor expression-enhancing protein 5/6 | (RefSeq) ribokinase (A)	--	XP_013456796.1	--	At1g49350	GO:0050225,pseudouridine kinase activity; GO:0019252,starch biosynthetic process; GO:0003674,molecular_function; GO:0003824,catalytic activity; GO:0016301,kinase activity; GO:0016740,transferase activity; GO:0016772,transferase activity, transferring phosphorus-containing groups; GO:0016773,phosphotransferase activity, alcohol group as acceptor; GO:0000271,polysaccharide biosynthetic process; GO:…	PF00294.24:pfkB family carbohydrate kinase	--	--	--
MS.gene92991	80277968	80278039	80276165	80276263	80278830	80278907	10,53,22	0,3,6	67,13,8	0,0,0	219	149	0.000113879	0.00594178	1.0,0.923,0.714	1.0,1.0,1.0	-0.121	down	chr1.2	80273745	80279190	+	--	--	--	--	XP_013470083.1	CYL2_ARATH RecName: Full=Cyclase-like protein 2 {ECO:0000305}; Flags: Precursor;	At1g44542	GO:0005783,endoplasmic reticulum; GO:0005576,extracellular region; GO:0005794,Golgi apparatus; GO:0005886,plasma membrane; GO:0099503,secretory vesicle; GO:0004061,arylformamidase activity; GO:0019441,tryptophan catabolic process to kynurenine; GO:0003674,molecular_function; GO:0003824,catalytic activity; GO:0016787,hydrolase activity; GO:0016810,hydrolase activity, acting on carbon-nitrogen (but…	PF04199.13:Putative cyclase	--	--	--
MS.gene067789	19672166	19672241	19671618	19671690	19672406	19672520	32,1,28	11,4,31	16,13,6	0,0,0	223	149	2.27484e-10	1.10061e-07	0.66,0.143,0.376	1.0,1.0,1.0	-0.607	down	chr7.1	19665740	19676532	-	--	--	K12580 CCR4-NOT transcription complex subunit 3 | (GenBank) transcription regulator NOT2/NOT3/NOT5 family protein (A)	ko03018: RNA degradation	XP_003624606.1	--	At5g18230	GO:0030015,CCR4-NOT core complex; GO:0005634,nucleus; GO:0000932,P-body; GO:0000289,nuclear-transcribed mRNA poly(A) tail shortening; GO:0006355,regulation of transcription, DNA-templated; GO:0000288,nuclear-transcribed mRNA catabolic process, deadenylation-dependent decay; GO:0000956,nuclear-transcribed mRNA catabolic process; GO:0008152,metabolic process; GO:0006139,nucleobase-containing compou…	PF04065.15:Not1 N-terminal domain, CCR4-Not complex component	--	--	--
MS.gene048804	6024355	6024424	6024185	6024256	6024896	6024990	9,31,97	0,1,9	45,5,11	0,0,0	217	149	0.000321179	0.0121228	1.0,0.955,0.881	1.0,1.0,1.0	-0.055	down	chr4.3	6020964	6027725	+	--	--	K01919 glutamate--cysteine ligase [EC:6.3.2.2] | (GenBank) glutamate-cysteine ligase B (A)	ko00270: Cysteine and methionine metabolism; ko00480: Glutathione metabolism; ko01100: Metabolic pathways; ko01240: Biosynthesis of cofactors	XP_003630512.1	GSH1_MEDTR RecName: Full=Glutamate--cysteine ligase, chloroplastic; EC=6.3.2.2; AltName: Full=Gamma-ECS; Short=GCS; AltName: Full=Gamma-glutamylcysteine synthetase; Flags: Precursor;	At4g23100	GO:0009507,chloroplast; GO:0005524,ATP binding; GO:0004357,glutamate-cysteine ligase activity; GO:0006750,glutathione biosynthetic process; GO:0000166,nucleotide binding; GO:0003674,molecular_function; GO:0005488,binding; GO:0008144,drug binding; GO:0017076,purine nucleotide binding; GO:0030554,adenyl nucleotide binding; GO:0032553,ribonucleotide binding; GO:0032555,purine ribonucleotide binding;…	PF04107.13:Glutamate-cysteine ligase family 2(GCS2)	--	--	--
MS.gene20639	3869977	3870180	3869520	3869748	3870315	3870559	1424,1829,4208	3,0,10	941,1049,969	19,0,36	298	149	1.70243e-11	1.13254e-08	0.996,1.0,0.995	0.961,1.0,0.931	0.033	up	chr6.3	3864991	3871179	+	--	--	K10529 alpha-dioxygenase [EC:1.14.99.-] | (GenBank) pathogen-inducible alpha-dioxygenase (A)	ko00592: alpha-Linolenic acid metabolism	XP_013450855.1	DOX1_ARATH RecName: Full=Alpha-dioxygenase 1; Short=Alpha DOX1; EC=1.14.99.-; AltName: Full=Fatty acid dioxygenase AlphaDOX1; AltName: Full=Pathogen-induced oxygenase; AltName: Full=Plant alpha dioxygenase 1; Flags: Precursor;	At3g01420	GO:0012511,monolayer-surrounded lipid storage body; GO:0020037,heme binding; GO:0046872,metal ion binding; GO:0016702,oxidoreductase activity, acting on single donors with incorporation of molecular oxygen, incorporation of two atoms of oxygen; GO:0004601,peroxidase activity; GO:1902609,(R)-2-hydroxy-alpha-linolenic acid biosynthetic process; GO:0008219,cell death; GO:0071732,cellular response to…	PF03098.15:Animal haem peroxidase	--	--	--
MS.gene60713	71103980	71104043	71101685	71101755	71104662	71105213	0,15,5	36,122,61	2,19,10	24,44,19	211	149	0.000308285	0.0118911	0.0,0.08,0.055	0.056,0.234,0.271	-0.142	down	chr1.2	71101686	71105213	-	--	--	--	--	XP_013469608.1	--	At1g22790	--	--	--	--	--
MS.gene007896	47250735	47250848	47249738	47250146	47254032	47254402	19,22,25	1,0,7	31,32,1	0,0,0	261	149	0.000236371	0.00975167	0.916,1.0,0.671	1.0,1.0,1.0	-0.138	down	chr8.3	47249739	47254402	+	--	--	K00074 3-hydroxybutyryl-CoA dehydrogenase [EC:1.1.1.157] | (GenBank) 3-hydroxyacyl-CoA dehyrogenase (A)	ko00360: Phenylalanine metabolism; ko00650: Butanoate metabolism; ko01100: Metabolic pathways; ko01200: Carbon metabolism	XP_003628547.1	AIM1_ARATH RecName: Full=Peroxisomal fatty acid beta-oxidation multifunctional protein AIM1 {ECO:0000305}; AltName: Full=Protein ABNORMAL INFLORESCENCE MERISTEM 1 {ECO:0000303|PubMed:10521521}; Short=AtAIM1 {ECO:0000303|PubMed:10521521}; Includes: RecName: Full=Enoyl-CoA hydratase/3-2-trans-enoyl-CoA isomerase/3-hydroxybutyryl-CoA epimerase; EC=4.2.1.17 {ECO:0000269|PubMed:10521521, ECO:0000269|P…	At3g15290	GO:0005618,cell wall; GO:0005777,peroxisome; GO:0005886,plasma membrane; GO:0009506,plasmodesma; GO:0003857,3-hydroxyacyl-CoA dehydrogenase activity; GO:0008692,3-hydroxybutyryl-CoA epimerase activity; GO:0004165,dodecenoyl-CoA delta-isomerase activity; GO:0004300,enoyl-CoA hydratase activity; GO:0070403,NAD+ binding; GO:0006635,fatty acid beta-oxidation; GO:0009908,flower development; GO:0009695…	PF02737.18:3-hydroxyacyl-CoA dehydrogenase, NAD binding domain	--	--	--
MS.gene37703	71092455	71092552	71091982	71092181	71092865	71092920	46,36,59	0,5,5	16,14,21	0,0,0	245	149	0.000229301	0.00960896	1.0,0.814,0.878	1.0,1.0,1.0	-0.103	down	chr6.3	71091241	71095223	-	--	--	K12486 stromal membrane-associated protein | (GenBank) ADP-ribosylation factor GTPase-activating protein AGD10 (A)	ko04144: Endocytosis	XP_003620300.2	AGD15_ARATH RecName: Full=Probable ADP-ribosylation factor GTPase-activating protein AGD15; Short=ARF GAP AGD15; AltName: Full=Protein ARF-GAP DOMAIN 15; Short=AtAGD15;	At5g54310	GO:0005096,GTPase activator activity; GO:0046872,metal ion binding; GO:0043547,positive regulation of GTPase activity; GO:0003674,molecular_function; GO:0008047,enzyme activator activity; GO:0098772,molecular function regulator; GO:0030234,enzyme regulator activity; GO:0030695,GTPase regulator activity; GO:0060589,nucleoside-triphosphatase regulator activity; GO:0005488,binding; GO:0043167,ion bi…	PF01412.18:Putative GTPase activating protein for Arf	--	--	--
MS.gene017348	59962677	59962739	59962101	59962515	59962869	59962981	133,144,178	33,80,83	83,98,98	0,6,5	210	149	1.11022e-16	1.96954e-13	0.741,0.561,0.603	1.0,0.921,0.933	-0.316	down	chr5.1	59960456	59963928	-	--	--	K12133 MYB-related transcription factor LHY | (RefSeq) protein LHY-like isoform X1 (A)	ko04712: Circadian rhythm - plant	XP_003616176.1	RVE1_ARATH RecName: Full=Protein REVEILLE 1;	At5g17300	GO:0005634,nucleus; GO:0003677,DNA binding; GO:0003700,DNA-binding transcription factor activity; GO:0009734,auxin-activated signaling pathway; GO:0007623,circadian rhythm; GO:0010600,regulation of auxin biosynthetic process; GO:0006355,regulation of transcription, DNA-templated; GO:0003674,molecular_function; GO:0003676,nucleic acid binding; GO:0005488,binding; GO:0097159,organic cyclic compound…	PF00249.31:Myb-like DNA-binding domain	MYB-related	TF	MYB->MYB-related
MS.gene050522	2498512	2498666	2498108	2498205	2499237	2499416	1050,394,504	10,32,0	41,432,474	0,0,0	298	149	9.32088e-07	0.000127194	0.981,0.86,1.0	1.0,1.0,1.0	-0.053	down	chr7.4	2495931	2499416	+	--	--	K01456 peptide-N4-(N-acetyl-beta-glucosaminyl)asparagine amidase [EC:3.5.1.52] | (RefSeq) peptide-N(4)-(N-acetyl-beta- glucosaminyl)asparagine amidase isoform X1 (A)	ko04141: Protein processing in endoplasmic reticulum	XP_003626438.1	AKR1_SOYBN RecName: Full=Probable aldo-keto reductase 1; Short=GmAKR1; EC=1.1.1.-;	At1g60690	GO:0047834,D-threo-aldose 1-dehydrogenase activity; GO:0003674,molecular_function; GO:0003824,catalytic activity; GO:0016491,oxidoreductase activity; GO:0016614,oxidoreductase activity, acting on CH-OH group of donors; GO:0016616,oxidoreductase activity, acting on the CH-OH group of donors, NAD or NADP as acceptor	PF00248.21:Aldo/keto reductase family	--	--	--
MS.gene24272	1974973	1975033	1974777	1974867	1975262	1975328	228,33,300	0,4,18	65,26,341	0,0,0	208	149	1.80277e-05	0.00123004	1.0,0.855,0.923	1.0,1.0,1.0	-0.074	down	chr1.1	1974042	1978302	+	--	--	K03444 MFS transporter, SP family, ERD6-like sugar transporter | (GenBank) sugar porter (SP) family MFS transporter (A)	--	XP_013466113.1	ERDL6_ARATH RecName: Full=Sugar transporter ERD6-like 6;	At1g75220	GO:0005794,Golgi apparatus; GO:0016021,integral component of membrane; GO:0005739,mitochondrion; GO:0009705,plant-type vacuole membrane; GO:0005774,vacuolar membrane; GO:0022857,transmembrane transporter activity; GO:0008643,carbohydrate transport; GO:0042593,glucose homeostasis; GO:0010030,positive regulation of seed germination; GO:0003674,molecular_function; GO:0005215,transporter activity; GO…	PF00083.24:Sugar (and other) transporter	--	--	--
MS.gene030404	6195953	6196072	6195053	6195221	6196851	6196913	20,86,42	0,15,0	2,6,6	0,0,0	267	149	0.00018063	0.00821636	1.0,0.762,1.0	1.0,1.0,1.0	-0.079	down	chr4.4	6194937	6197595	-	--	--	K00432 glutathione peroxidase [EC:1.11.1.9] | (GenBank) phospholipid hydroperoxide glutathione peroxidase (A)	ko00480: Glutathione metabolism; ko00590: Arachidonic acid metabolism; ko01100: Metabolic pathways	AFP99878.1	GPX4_CITSI RecName: Full=Probable phospholipid hydroperoxide glutathione peroxidase; Short=PHGPx; EC=1.11.1.12; AltName: Full=Salt-associated protein;	At4g11600	GO:0005737,cytoplasm; GO:0004602,glutathione peroxidase activity; GO:0047066,phospholipid-hydroperoxide glutathione peroxidase activity; GO:0006979,response to oxidative stress; GO:0003674,molecular_function; GO:0003824,catalytic activity; GO:0004601,peroxidase activity; GO:0016491,oxidoreductase activity; GO:0016209,antioxidant activity; GO:0016684,oxidoreductase activity, acting on peroxide as …	PF00255.19:Glutathione peroxidase	--	--	--
MS.gene029241	87121619	87121713	87119543	87121007	87121886	87122092	14,13,3	0,0,0	18,12,38	0,0,13	242	149	0.000107985	0.00569004	1.0,1.0,1.0	1.0,1.0,0.643	0.119	up	chr1.4	87119544	87122372	-	--	--	K10268 F-box and leucine-rich repeat protein 2/20 | (RefSeq) F-box/LRR-repeat protein 4-like (A)	--	XP_003592693.1	FBL10_ARATH RecName: Full=F-box/LRR-repeat protein 10;	At2g17020	GO:0019005,SCF ubiquitin ligase complex; GO:0031146,SCF-dependent proteasomal ubiquitin-dependent protein catabolic process; GO:0019941,modification-dependent protein catabolic process; GO:0008152,metabolic process; GO:0006508,proteolysis; GO:0051603,proteolysis involved in cellular protein catabolic process; GO:0006511,ubiquitin-dependent protein catabolic process; GO:0006807,nitrogen compound m…	PF13516.6:Leucine Rich repeat	--	--	--
MS.gene068274	87018810	87018963	87018272	87018462	87019881	87020031	52,32,51	0,3,5	1,66,44	0,0,0	298	149	0.00100429	0.0314402	1.0,0.842,0.836	1.0,1.0,1.0	-0.107	down	chr4.4	87011672	87020031	-	--	--	K18660 malonyl-CoA/methylmalonyl-CoA synthetase [EC:6.2.1.-] | (GenBank) fatty acyl-CoA synthetase family protein (A)	ko00061: Fatty acid biosynthesis; ko00280: Valine, leucine and isoleucine degradation; ko01100: Metabolic pathways; ko01212: Fatty acid metabolism	XP_013454772.1	CCL8_HUMLU RecName: Full=Probable CoA ligase CCL8 {ECO:0000305|PubMed:23300257}; Short=HlCCL8 {ECO:0000303|PubMed:23300257}; EC=6.2.1.- {ECO:0000305|PubMed:23300257};	At3g16170	GO:0003987,acetate-CoA ligase activity; GO:0003674,molecular_function; GO:0003824,catalytic activity; GO:0016405,CoA-ligase activity; GO:0016874,ligase activity; GO:0016877,ligase activity, forming carbon-sulfur bonds; GO:0016878,acid-thiol ligase activity	PF00501.28:AMP-binding enzyme	--	--	--
MS.gene31736	13140474	13140584	13139905	13140002	13140919	13141023	162,240,318	4,7,13	109,47,156	0,0,0	258	149	2.203e-05	0.00146555	0.959,0.952,0.934	1.0,1.0,1.0	-0.052	down	chr1.1	13137081	13148639	+	--	--	K00264 glutamate synthase (NADH) [EC:1.4.1.14] | (GenBank) NADH glutamate synthase (A)	ko00250: Alanine, aspartate and glutamate metabolism; ko00910: Nitrogen metabolism; ko01100: Metabolic pathways; ko01110: Biosynthesis of secondary metabolites; ko01230: Biosynthesis of amino acids	AAB41904.1	GLSN_MEDSA RecName: Full=Glutamate synthase [NADH], amyloplastic; EC=1.4.1.14; AltName: Full=NADH-GOGAT; Flags: Precursor;	At5g53460	GO:0009501,amyloplast; GO:0051538,3 iron, 4 sulfur cluster binding; GO:0050660,flavin adenine dinucleotide binding; GO:0010181,FMN binding; GO:0016040,glutamate synthase (NADH) activity; GO:0005506,iron ion binding; GO:0006541,glutamine metabolic process; GO:0097054,L-glutamate biosynthetic process; GO:0003674,molecular_function; GO:0005488,binding; GO:0048037,cofactor binding; GO:0051536,iron-su…	PF00310.21:Glutamine amidotransferases class-II	--	--	--
MS.gene37747	72198033	72198142	72197767	72197870	72198429	72198592	92,20,133	5,0,8	325,312,160	0,0,2	257	149	1.01753e-05	0.000812927	0.914,1.0,0.906	1.0,1.0,0.979	-0.053	down	chr6.3	72194814	72198592	+	--	--	K01188 beta-glucosidase [EC:3.2.1.21] | (GenBank) glycoside hydrolase family 1 protein (A)	ko00460: Cyanoamino acid metabolism; ko00500: Starch and sucrose metabolism; ko00940: Phenylpropanoid biosynthesis; ko01100: Metabolic pathways; ko01110: Biosynthesis of secondary metabolites	XP_003620196.2	BGL12_ORYSI RecName: Full=Beta-glucosidase 12 {ECO:0000305}; EC=3.2.1.21 {ECO:0000305}; Flags: Precursor;	At5g42260	GO:0005576,extracellular region; GO:0008422,beta-glucosidase activity; GO:0102483,scopolin beta-glucosidase activity; GO:0005975,carbohydrate metabolic process; GO:0003674,molecular_function; GO:0003824,catalytic activity; GO:0004553,hydrolase activity, hydrolyzing O-glycosyl compounds; GO:0015926,glucosidase activity; GO:0016787,hydrolase activity; GO:0016798,hydrolase activity, acting on glycos…	PF00232.18:Glycosyl hydrolase family 1	--	--	--
MS.gene012839	85641051	85641226	85637584	85637761	85641372	85641437	842,391,982	7,6,32	820,1301,395	0,0,0	298	149	1.65309e-09	6.28411e-07	0.984,0.97,0.939	1.0,1.0,1.0	-0.036	down	chr3.3	85634143	85642942	-	--	--	K00826 branched-chain amino acid aminotransferase [EC:2.6.1.42] | (GenBank) branched-chain amino acid aminotransferase (A)	ko00270: Cysteine and methionine metabolism; ko00280: Valine, leucine and isoleucine degradation; ko00290: Valine, leucine and isoleucine biosynthesis; ko00770: Pantothenate and CoA biosynthesis; ko00966: Glucosinolate biosynthesis; ko01100: Metabolic pathways; ko01110: Biosynthesis of secondary metabolites; ko01210: 2-Oxocarboxylic acid metabolism; ko01230: Biosynthesis of amino acids; ko01240: …	XP_013461828.1	BCAT2_ARATH RecName: Full=Branched-chain-amino-acid aminotransferase 2, chloroplastic; Short=Atbcat-2; EC=2.6.1.42; Flags: Precursor;	At1g10070	GO:0009507,chloroplast; GO:0005829,cytosol; GO:0004084,branched-chain-amino-acid transaminase activity; GO:0052656,L-isoleucine transaminase activity; GO:0052654,L-leucine transaminase activity; GO:0050048,L-leucine:2-oxoglutarate aminotransferase activity; GO:0052655,L-valine transaminase activity; GO:0009097,isoleucine biosynthetic process; GO:0009098,leucine biosynthetic process; GO:0071669,pl…	PF01063.19:Amino-transferase class IV	--	--	--
MS.gene012839	85641051	85641226	85637584	85637761	85642867	85642942	345,152,361	5,2,11	386,592,170	0,0,0	298	149	0.000116767	0.00597533	0.972,0.974,0.943	1.0,1.0,1.0	-0.037	down	chr3.3	85634143	85642942	-	--	--	K00826 branched-chain amino acid aminotransferase [EC:2.6.1.42] | (GenBank) branched-chain amino acid aminotransferase (A)	ko00270: Cysteine and methionine metabolism; ko00280: Valine, leucine and isoleucine degradation; ko00290: Valine, leucine and isoleucine biosynthesis; ko00770: Pantothenate and CoA biosynthesis; ko00966: Glucosinolate biosynthesis; ko01100: Metabolic pathways; ko01110: Biosynthesis of secondary metabolites; ko01210: 2-Oxocarboxylic acid metabolism; ko01230: Biosynthesis of amino acids; ko01240: …	XP_013461828.1	BCAT2_ARATH RecName: Full=Branched-chain-amino-acid aminotransferase 2, chloroplastic; Short=Atbcat-2; EC=2.6.1.42; Flags: Precursor;	At1g10070	GO:0009507,chloroplast; GO:0005829,cytosol; GO:0004084,branched-chain-amino-acid transaminase activity; GO:0052656,L-isoleucine transaminase activity; GO:0052654,L-leucine transaminase activity; GO:0050048,L-leucine:2-oxoglutarate aminotransferase activity; GO:0052655,L-valine transaminase activity; GO:0009097,isoleucine biosynthetic process; GO:0009098,leucine biosynthetic process; GO:0071669,pl…	PF01063.19:Amino-transferase class IV	--	--	--
MS.gene41672	81469015	81469254	81468366	81468477	81469815	81469915	14,5,8	0,8,2	11,14,17	1,0,0	298	149	0.000116064	0.00597533	1.0,0.238,0.667	0.846,1.0,1.0	-0.314	down	chr3.3	81464968	81469915	+	--	--	K15454 tRNA pseudouridine32 synthase [EC:5.4.99.28] | (GenBank) pseudouridine synthase Rlu family protein (A)	--	XP_003602781.1	PUS7_ORYSJ RecName: Full=RNA pseudouridine synthase 7; EC=5.4.99.-; AltName: Full=RNA pseudouridylate synthase 7; AltName: Full=RNA-uridine isomerase 7;	At5g51140	GO:0009982,pseudouridine synthase activity; GO:0003723,RNA binding; GO:0000455,enzyme-directed rRNA pseudouridine synthesis; GO:0003674,molecular_function; GO:0003824,catalytic activity; GO:0016853,isomerase activity; GO:0016866,intramolecular transferase activity; GO:0003676,nucleic acid binding; GO:0005488,binding; GO:0097159,organic cyclic compound binding; GO:1901363,heterocyclic compound bin…	PF00849.22:RNA pseudouridylate synthase	--	--	--
MS.gene035958	48112119	48112500	48111447	48111550	48112576	48112638	23,63,45	0,3,5	15,20,23	0,0,0	298	149	0.00108531	0.0333874	1.0,0.913,0.818	1.0,1.0,1.0	-0.09	down	chr5.3	48110544	48117567	-	--	--	--	--	XP_003614901.2	--	At4g08540	--	PF10186.9:Vacuolar sorting 38 and autophagy-related subunit 14	--	--	--
MS.gene58168	10175655	10175690	10175353	10175462	10176257	10176308	7,18,11	0,0,0	42,48,1	3,9,0	183	149	4.49844e-05	0.00260225	1.0,1.0,1.0	0.919,0.813,1.0	0.089	up	chr4.2	10174727	10178332	-	--	--	K22763 deubiquitinase DESI2 [EC:3.4.19.12] | (Kazusa) Lj2g3v1989220.3; - (A)	--	XP_013446850.1	NUDT2_ARATH RecName: Full=Nudix hydrolase 2; Short=AtNUDT2; EC=3.6.1.-; AltName: Full=ADP-ribose pyrophosphatase; EC=3.6.1.13; AltName: Full=NADH pyrophosphatase; EC=3.6.1.22;	At5g47650	GO:0005829,cytosol; GO:0047631,ADP-ribose diphosphatase activity; GO:0046872,metal ion binding; GO:0051287,NAD binding; GO:0000210,NAD+ diphosphatase activity; GO:0035529,NADH pyrophosphatase activity; GO:0006979,response to oxidative stress; GO:0003674,molecular_function; GO:0003824,catalytic activity; GO:0016462,pyrophosphatase activity; GO:0016787,hydrolase activity; GO:0016817,hydrolase activ…	PF18290.1:Nudix hydrolase domain	--	--	--
MS.gene028220	16499221	16499439	16498567	16499124	16499654	16499763	83,104,124	16,1,2	2,31,33	4,8,9	298	149	0.000432182	0.0157539	0.722,0.981,0.969	0.2,0.66,0.647	0.388	up	chr4.2	16496603	16499968	-	--	--	K14638 solute carrier family 15 (peptide/histidine transporter), member 3/4 | (RefSeq) protein NRT1/ PTR FAMILY 8.3-like (A)	--	PNY07746.1	PTR2_ARATH RecName: Full=Protein NRT1/ PTR FAMILY 8.3; Short=AtNPF8.3; AltName: Full=Histidine-transporting protein; AltName: Full=Peptide transporter PTR2;	At2g02040	GO:0005794,Golgi apparatus; GO:0016021,integral component of membrane; GO:0000325,plant-type vacuole; GO:0009705,plant-type vacuole membrane; GO:0005774,vacuolar membrane; GO:0005773,vacuole; GO:0071916,dipeptide transmembrane transporter activity; GO:0015334,high-affinity oligopeptide transmembrane transporter activity; GO:0042937,tripeptide transmembrane transporter activity; GO:0042938,dipepti…	PF00854.21:POT family	--	--	--
MS.gene65654	47597618	47597869	47596843	47597074	47598162	47598487	89,37,65	0,11,13	1,10,27	0,0,0	298	149	6.53219e-06	0.000579405	1.0,0.627,0.714	1.0,1.0,1.0	-0.22	down	chr5.2	47596844	47599135	+	--	--	K05658 ATP-binding cassette, subfamily B (MDR/TAP), member 1 [EC:7.6.2.2] | (RefSeq) uncharacterized protein LOC111781709 (A)	ko02010: ABC transporters	XP_003614575.1	SRG1_ARATH RecName: Full=Protein SRG1; Short=AtSRG1; AltName: Full=Protein SENESCENCE-RELATED GENE 1;	At1g17020	GO:0046872,metal ion binding; GO:0016682,oxidoreductase activity, acting on diphenols and related substances as donors, oxygen as acceptor; GO:0010150,leaf senescence; GO:0003674,molecular_function; GO:0005488,binding; GO:0043167,ion binding; GO:0043169,cation binding; GO:0003824,catalytic activity; GO:0016491,oxidoreductase activity; GO:0016679,oxidoreductase activity, acting on diphenols and re…	PF03171.20:2OG-Fe(II) oxygenase superfamily	--	--	--
MS.gene022246	66664460	66664655	66661896	66662109	66665237	66666200	162,63,48	0,10,0	191,74,297	0,1,0	298	149	0.00153044	0.0441937	1.0,0.759,1.0	1.0,0.974,1.0	-0.072	down	chr3.3	66660416	66666200	+	--	--	K00423 L-ascorbate oxidase [EC:1.10.3.3] | (GenBank) L-ascorbate oxidase (A)	ko00053: Ascorbate and aldarate metabolism; ko01100: Metabolic pathways	XP_013461070.1	ASO_CUCSA RecName: Full=L-ascorbate oxidase; Short=ASO; Short=Ascorbase; EC=1.10.3.3; Flags: Precursor;	At5g21100	GO:0005576,extracellular region; GO:0005507,copper ion binding; GO:0008447,L-ascorbate oxidase activity; GO:0003674,molecular_function; GO:0005488,binding; GO:0046872,metal ion binding; GO:0043167,ion binding; GO:0043169,cation binding; GO:0046914,transition metal ion binding; GO:0003824,catalytic activity; GO:0016491,oxidoreductase activity; GO:0016682,oxidoreductase activity, acting on diphenol…	PF00394.22:Multicopper oxidase	--	--	--
MS.gene041776	68909633	68909727	68909391	68909469	68910436	68910515	32,9,18	5,9,0	34,50,33	3,0,0	242	149	0.00045693	0.0164182	0.798,0.381,1.0	0.875,1.0,1.0	-0.232	down	chr1.1	68909392	68914742	-	--	--	K06180 23S rRNA pseudouridine1911/1915/1917 synthase [EC:5.4.99.23] | (RefSeq) predicted protein (A)	--	XP_003591952.2	PUS5_ARATH RecName: Full=RNA pseudouridine synthase 5; EC=5.4.99.-; AltName: Full=RNA pseudouridylate synthase 5; AltName: Full=RNA-uridine isomerase 5;	At3g52260	GO:0009982,pseudouridine synthase activity; GO:0003723,RNA binding; GO:0001522,pseudouridine synthesis; GO:0003674,molecular_function; GO:0003824,catalytic activity; GO:0016853,isomerase activity; GO:0016866,intramolecular transferase activity; GO:0003676,nucleic acid binding; GO:0005488,binding; GO:0097159,organic cyclic compound binding; GO:1901363,heterocyclic compound binding; GO:0008152,meta…	PF00849.22:RNA pseudouridylate synthase	--	--	--
MS.gene50445	16194735	16194905	16194540	16194625	16195103	16195378	230,14,36	11,17,5	81,46,72	0,0,0	298	149	2.66075e-08	5.24463e-06	0.913,0.292,0.783	1.0,1.0,1.0	-0.337	down	chr7.4	16192950	16195755	+	--	--	--	--	XP_003625212.1	--	At3g12150	GO:0016787,hydrolase activity; GO:0003674,molecular_function; GO:0003824,catalytic activity	PF09752.9:Abhydrolase domain containing 18	--	--	--
MS.gene76470	31249996	31250152	31249078	31249261	31250746	31250872	125,8,6	1,1,9	10,18,31	0,0,0	298	149	0.000283762	0.0111043	0.984,0.8,0.25	1.0,1.0,1.0	-0.322	down	chr8.1	31245376	31252494	-	--	--	K01285 lysosomal Pro-X carboxypeptidase [EC:3.4.16.2] | (RefSeq) lysosomal Pro-X carboxypeptidase (A)	--	XP_003629354.1	EDA2_ARATH RecName: Full=Probable serine protease EDA2; EC=3.4.-.-; AltName: Full=Protein EMBRYO SAC DEVELOPMENT ARREST 2; Flags: Precursor;	At4g36190	GO:0005576,extracellular region; GO:0005773,vacuole; GO:0008239,dipeptidyl-peptidase activity; GO:0008236,serine-type peptidase activity; GO:0009561,megagametogenesis; GO:0006508,proteolysis; GO:0003674,molecular_function; GO:0003824,catalytic activity; GO:0004177,aminopeptidase activity; GO:0008233,peptidase activity; GO:0008238,exopeptidase activity; GO:0070011,peptidase activity, acting on L-a…	PF05577.12:Serine carboxypeptidase S28	--	--	--
MS.gene69682	37121429	37121542	37120375	37120507	37122186	37122412	6,2,4	0,0,0	5,13,5	0,3,4	261	149	5.09782e-05	0.00288623	1.0,1.0,1.0	1.0,0.712,0.416	0.291	up	chr8.3	37117029	37122412	+	--	--	K09680 type II pantothenate kinase [EC:2.7.1.33] | (GenBank) pantothenate kinase (A)	ko00770: Pantothenate and CoA biosynthesis; ko01100: Metabolic pathways; ko01240: Biosynthesis of cofactors	XP_013446004.1	PANK2_ORYSJ RecName: Full=Pantothenate kinase 2 {ECO:0000250|UniProtKB:Q8L5Y9}; AltName: Full=Pantothenic acid kinase 2 {ECO:0000250|UniProtKB:Q8L5Y9}; Includes: RecName: Full=Pantothenate kinase {ECO:0000250|UniProtKB:Q8L5Y9}; EC=2.7.1.33 {ECO:0000250|UniProtKB:Q8L5Y9}; Includes: RecName: Full=4'-phosphopantetheine phosphatase {ECO:0000250|UniProtKB:Q8L5Y9}; EC=3.1.3.- {ECO:0000250|UniProtKB:Q8L…	At4g32180_1	GO:0005829,cytosol; GO:0005634,nucleus; GO:0005524,ATP binding; GO:0016787,hydrolase activity; GO:0046872,metal ion binding; GO:0004594,pantothenate kinase activity; GO:0015937,coenzyme A biosynthetic process; GO:0000166,nucleotide binding; GO:0003674,molecular_function; GO:0005488,binding; GO:0008144,drug binding; GO:0017076,purine nucleotide binding; GO:0030554,adenyl nucleotide binding; GO:003…	PF03630.14:Fumble	--	--	--
MS.gene05268	78388297	78388362	78387519	78387639	78388518	78388689	0,0,0	5,15,11	2,0,6	0,10,0	213	149	6.29176e-05	0.003488	0.0,0.0,0.0	1.0,0.0,1.0	-0.667	down	chr6.2	78387107	78389495	+	--	--	K01265 methionyl aminopeptidase [EC:3.4.11.18] | (Kazusa) Lj0g3v0008679.1; - (A)	--	GAU25667.1	MAP1A_ARATH RecName: Full=Methionine aminopeptidase 1A {ECO:0000255|HAMAP-Rule:MF_03174}; Short=MAP 1A {ECO:0000255|HAMAP-Rule:MF_03174}; Short=MetAP 1A {ECO:0000255|HAMAP-Rule:MF_03174}; EC=3.4.11.18 {ECO:0000255|HAMAP-Rule:MF_03174}; AltName: Full=Peptidase M 1A {ECO:0000255|HAMAP-Rule:MF_03174};	At2g45240	GO:0005737,cytoplasm; GO:0005829,cytosol; GO:0046872,metal ion binding; GO:0070006,metalloaminopeptidase activity; GO:0031365,N-terminal protein amino acid modification; GO:0070084,protein initiator methionine removal; GO:0016485,protein processing; GO:0003674,molecular_function; GO:0005488,binding; GO:0043167,ion binding; GO:0043169,cation binding; GO:0003824,catalytic activity; GO:0004177,amino…	PF15801.5:zf-MYND-like zinc finger, mRNA-binding	--	--	--
MS.gene74935	76440275	76440419	76439585	76439797	76441069	76441202	180,76,187	19,49,89	21,30,10	0,1,0	292	149	1.05975e-08	2.45216e-06	0.829,0.442,0.517	1.0,0.939,1.0	-0.384	down	chr1.3	76438559	76441202	-	--	--	K08900 mitochondrial chaperone BCS1 | (RefSeq) AAA-ATPase At3g50940-like (A)	--	XP_013470327.1	--	At4g35110	--	PF05278.12:Arabidopsis phospholipase-like protein (PEARLI 4)	--	--	--
MS.gene060715	31643165	31643191	31642253	31642714	31643499	31643530	11,9,7	4,0,4	37,75,55	0,0,0	174	149	1.96083e-05	0.00132095	0.702,1.0,0.6	1.0,1.0,1.0	-0.233	down	chr1.3	31642254	31652642	+	--	--	K09284 AP2-like factor, euAP2 lineage | (GenBank) AP2 domain transcription factor (A)	--	XP_013467316.1	RAP27_ARATH RecName: Full=Ethylene-responsive transcription factor RAP2-7; AltName: Full=Protein RELATED TO APETALA2 7; AltName: Full=Protein TARGET OF EAT 1;	At2g28550	GO:0005634,nucleus; GO:0003677,DNA binding; GO:0003700,DNA-binding transcription factor activity; GO:0009873,ethylene-activated signaling pathway; GO:0003674,molecular_function; GO:0003676,nucleic acid binding; GO:0005488,binding; GO:0097159,organic cyclic compound binding; GO:1901363,heterocyclic compound binding; GO:0140110,transcription regulator activity; GO:0000160,phosphorelay signal transd…	PF00847.20:AP2 domain	AP2/ERF-ERF	TF	AP2/ERF->AP2/ERF-ERF
MS.gene057755	23181	23259	22023	22101	25739	25808	4,2,9	6,1,0	0,1,0	5,11,5	226	149	5.5277e-08	9.48981e-06	0.305,0.569,1.0	0.0,0.057,0.0	0.606	up	33352	15507	25808	+	--	--	K14018 phospholipase A-2-activating protein | (RefSeq) phospholipase A-2-activating protein-like (A)	ko04141: Protein processing in endoplasmic reticulum	OIW08701.1	--	At3g18860	--	PF00400.32:WD domain, G-beta repeat	--	--	--
MS.gene023907	25846502	25846572	25846310	25846390	25847457	25847624	6,2,8	3,2,5	11,11,17	0,0,0	218	149	3.62715e-09	9.65185e-07	0.578,0.406,0.522	1.0,1.0,1.0	-0.498	down	chr7.1	25845723	25849195	-	--	--	K21249 UV radiation resistance-associated gene protein | (RefSeq) MOT27; predicted protein (A)	--	XP_003623980.1	--	At2g45990	GO:0005768,endosome; GO:0000323,lytic vacuole; GO:0000149,SNARE binding; GO:0035493,SNARE complex assembly; GO:0005515,protein binding; GO:0003674,molecular_function; GO:0005488,binding; GO:0016192,vesicle-mediated transport; GO:0006906,vesicle fusion; GO:0006810,transport; GO:0006996,organelle organization; GO:0008150,biological_process; GO:0061025,membrane fusion; GO:0009987,cellular process; G…	PF00702.26:haloacid dehalogenase-like hydrolase	--	--	--
MS.gene55939	57490685	57490753	57489607	57489700	57491425	57491492	27,15,33	0,1,8	5,5,9	0,0,1	216	149	0.00106037	0.0328097	1.0,0.912,0.74	1.0,1.0,0.861	-0.07	down	chr2.3	57474911	57498150	+	--	--	K10589 ubiquitin-protein ligase E3 C [EC:2.3.2.26] | (RefSeq) E3 ubiquitin-protein ligase UPL6 (A)	ko04120: Ubiquitin mediated proteolysis	XP_004486523.1	UPL6_ARATH RecName: Full=E3 ubiquitin-protein ligase UPL6; Short=Ubiquitin-protein ligase 6; EC=2.3.2.26; AltName: Full=HECT-type E3 ubiquitin transferase UPL6;	At3g17205	GO:0061630,ubiquitin protein ligase activity; GO:0000209,protein polyubiquitination; GO:0006511,ubiquitin-dependent protein catabolic process; GO:0003674,molecular_function; GO:0003824,catalytic activity; GO:0004842,ubiquitin-protein transferase activity; GO:0016740,transferase activity; GO:0019787,ubiquitin-like protein transferase activity; GO:0061659,ubiquitin-like protein ligase activity; GO:…	PF00632.25:HECT-domain (ubiquitin-transferase)	--	--	--
MS.gene038914	38595629	38595750	38595019	38595117	38595829	38595882	53,38,11	1,8,0	6,40,29	0,0,0	269	149	0.000179693	0.00821636	0.967,0.725,1.0	1.0,1.0,1.0	-0.103	down	chr2.1	38593572	38600311	-	--	--	K01805 xylose isomerase [EC:5.3.1.5] | (RefSeq) xylose isomerase (A)	ko00040: Pentose and glucuronate interconversions; ko00051: Fructose and mannose metabolism; ko01100: Metabolic pathways	XP_016189305.1	--	At1g10040	GO:0016787,hydrolase activity; GO:0003674,molecular_function; GO:0003824,catalytic activity	PF05057.14:Putative serine esterase (DUF676)	--	--	--
MS.gene073805	47068586	47068694	47068266	47068347	47068841	47068918	52,68,38	5,23,10	43,32,41	0,1,0	256	149	6.02641e-10	2.46712e-07	0.858,0.632,0.689	1.0,0.949,1.0	-0.257	down	chr1.3	47068144	47070452	-	--	--	K00799 glutathione S-transferase [EC:2.5.1.18] | (GenBank) glutathione S-transferase tau (A)	ko00480: Glutathione metabolism; ko01100: Metabolic pathways	XP_013468274.1	GSTL3_ARATH RecName: Full=Glutathione S-transferase L3; Short=AtGSTL3; EC=2.5.1.18; AltName: Full=GST class-lambda member 3;	At5g02790	GO:0005829,cytosol; GO:0005886,plasma membrane; GO:0004364,glutathione transferase activity; GO:0006749,glutathione metabolic process; GO:0010731,protein glutathionylation; GO:0046686,response to cadmium ion; GO:0009636,response to toxic substance; GO:0003674,molecular_function; GO:0003824,catalytic activity; GO:0016740,transferase activity; GO:0016765,transferase activity, transferring alkyl or …	PF13417.6:Glutathione S-transferase, N-terminal domain	--	--	--
MS.gene53422	32650144	32650320	32649086	32649161	32650651	32650731	13,21,35	0,5,9	4,1,3	0,0,0	298	149	3.45973e-06	0.000361033	1.0,0.677,0.66	1.0,1.0,1.0	-0.221	down	chr3.3	32649087	32650731	-	--	--	K01640 hydroxymethylglutaryl-CoA lyase [EC:4.1.3.4] | (RefSeq) LOW QUALITY PROTEIN: hydroxymethylglutaryl-CoA lyase, mitochondrial (A)	ko00072: Synthesis and degradation of ketone bodies; ko00280: Valine, leucine and isoleucine degradation; ko00650: Butanoate metabolism; ko01100: Metabolic pathways; ko01110: Biosynthesis of secondary metabolites; ko04146: Peroxisome	XP_013459340.1	FB118_ARATH RecName: Full=F-box protein At2g26850;	At2g41170	--	--	--	--	--
MS.gene030405	6200622	6200828	6200064	6200144	6200992	6201205	23,28,12	3,13,1	24,100,38	0,0,0	298	149	2.81718e-09	7.89108e-07	0.793,0.519,0.857	1.0,1.0,1.0	-0.277	down	chr4.4	6198955	6201205	+	--	--	K00799 glutathione S-transferase [EC:2.5.1.18] | (GenBank) glutathione S-transferase theta (A)	ko00480: Glutathione metabolism; ko01100: Metabolic pathways	AFK47457.1	GSTT1_ARATH RecName: Full=Glutathione S-transferase T1; Short=AtGSTT1; EC=2.5.1.18; AltName: Full=GST class-theta member 1; AltName: Full=Glutathione S-transferase 10;	At5g41210	GO:0005737,cytoplasm; GO:0005634,nucleus; GO:0005777,peroxisome; GO:0009536,plastid; GO:0004364,glutathione transferase activity; GO:0004601,peroxidase activity; GO:0006749,glutathione metabolic process; GO:0009407,toxin catabolic process; GO:0003674,molecular_function; GO:0003824,catalytic activity; GO:0016740,transferase activity; GO:0016765,transferase activity, transferring alkyl or aryl (oth…	PF02798.20:Glutathione S-transferase, N-terminal domain	--	--	--
MS.gene007304	10501217	10501295	10500463	10500658	10501384	10501522	50,240,92	0,18,0	46,74,95	0,0,0	226	149	6.04218e-05	0.00338489	1.0,0.898,1.0	1.0,1.0,1.0	-0.034	down	chr7.3	10499634	10504234	-	--	--	K01689 enolase [EC:4.2.1.11] | (GenBank) phosphopyruvate hydratase (A)	ko00010: Glycolysis / Gluconeogenesis; ko01100: Metabolic pathways; ko01110: Biosynthesis of secondary metabolites; ko01200: Carbon metabolism; ko01230: Biosynthesis of amino acids; ko03018: RNA degradation	XP_013450091.1	ENO_RICCO RecName: Full=Enolase; EC=4.2.1.11; AltName: Full=2-phospho-D-glycerate hydro-lyase; AltName: Full=2-phosphoglycerate dehydratase;	At2g36530	GO:0000015,phosphopyruvate hydratase complex; GO:0000287,magnesium ion binding; GO:0004634,phosphopyruvate hydratase activity; GO:0006096,glycolytic process; GO:0003674,molecular_function; GO:0005488,binding; GO:0046872,metal ion binding; GO:0043167,ion binding; GO:0043169,cation binding; GO:0003824,catalytic activity; GO:0016829,lyase activity; GO:0016835,carbon-oxygen lyase activity; GO:0016836…	PF00113.22:Enolase, C-terminal TIM barrel domain	--	--	--
MS.gene06230	78985133	78985286	78984711	78984751	78986008	78986184	156,171,94	4,0,13	128,106,84	0,0,2	298	149	0.000182256	0.00822005	0.951,1.0,0.783	1.0,1.0,0.955	-0.074	down	chr3.1	78982827	78991272	+	--	--	--	--	XP_003602796.2	FBL91_ARATH RecName: Full=F-box/LRR-repeat protein At5g63520;	At5g63520	GO:0032436,positive regulation of proteasomal ubiquitin-dependent protein catabolic process; GO:0000209,protein polyubiquitination; GO:0019941,modification-dependent protein catabolic process; GO:0008152,metabolic process; GO:0006508,proteolysis; GO:0051603,proteolysis involved in cellular protein catabolic process; GO:0006511,ubiquitin-dependent protein catabolic process; GO:0006807,nitrogen com…	PF10442.9:FIST C domain	--	--	--
MS.gene007267	10279747	10279828	10278967	10279048	10279943	10280054	19,5,30	10,0,1	7,26,9	0,1,0	229	149	0.000345804	0.0127803	0.553,1.0,0.951	1.0,0.944,1.0	-0.147	down	chr7.3	10278968	10280990	-	--	--	K00850 6-phosphofructokinase 1 [EC:2.7.1.11] | (RefSeq) ATP-dependent 6-phosphofructokinase 5, chloroplastic-like (A)	ko00010: Glycolysis / Gluconeogenesis; ko00030: Pentose phosphate pathway; ko00051: Fructose and mannose metabolism; ko00052: Galactose metabolism; ko01100: Metabolic pathways; ko01110: Biosynthesis of secondary metabolites; ko01200: Carbon metabolism; ko01230: Biosynthesis of amino acids; ko03018: RNA degradation	XP_003625765.1	--	At5g03660	GO:0005794,Golgi apparatus; GO:0005622,intracellular; GO:0005575,cellular_component; GO:0005623,cell; GO:0005737,cytoplasm; GO:0043231,intracellular membrane-bounded organelle; GO:0012505,endomembrane system; GO:0043226,organelle; GO:0043227,membrane-bounded organelle; GO:0043229,intracellular organelle; GO:0044424,intracellular part; GO:0044444,cytoplasmic part; GO:0044464,cell part	PF04949.13:Transcriptional activator	--	--	--
MS.gene031192	87472582	87472686	87471932	87472060	87472832	87472920	85,72,17	2,30,2	13,24,140	0,0,0	252	149	3.97591e-08	7.29648e-06	0.962,0.587,0.834	1.0,1.0,1.0	-0.206	down	chr3.1	87470878	87474609	+	--	--	--	--	XP_013461970.1	--	At5g11500	--	PF05670.13:NFACT protein RNA binding domain	--	--	--
MS.gene24824	6836612	6836774	6836127	6836203	6837721	6838470	52,62,4	2,9,4	45,40,26	0,0,0	298	149	2.46118e-06	0.000267314	0.929,0.775,0.333	1.0,1.0,1.0	-0.321	down	chr8.1	6835281	6838470	-	--	--	K15082 DNA repair protein RAD7 | (GenBank) RNI superfamily protein (A)	--	XP_013458413.1	EBF1_ARATH RecName: Full=EIN3-binding F-box protein 1; AltName: Full=F-box/LRR-repeat protein 6;	At2g06030	GO:0005737,cytoplasm; GO:0005634,nucleus; GO:0019005,SCF ubiquitin ligase complex; GO:0009873,ethylene-activated signaling pathway; GO:0010105,negative regulation of ethylene-activated signaling pathway; GO:0016567,protein ubiquitination; GO:0009723,response to ethylene; GO:0031146,SCF-dependent proteasomal ubiquitin-dependent protein catabolic process; GO:0006511,ubiquitin-dependent protein cata…	PF12799.7:Leucine Rich repeats (2 copies)	--	--	--

## Sheet: S vs JS
GeneID	exonStart_0base	exonEnd	upstreamES	upstreamEE	downstreamES	downstreamEE	IJC_SAMPLE_1	SJC_SAMPLE_1	IJC_SAMPLE_2	SJC_SAMPLE_2	IncFormLen	SkipFormLen	PValue	FDR	IncLevel1	IncLevel2	IncLevelDifference	regulation	chr	start	end	strand	gene_name	gene_description	KEGG	KEGG pathway	NR	Swissprot	KOG	GO	Pfam	TF-Family	TF-Category	TF-Classification
MS.gene86994	143759	143914	142594	142780	144252	144403	207,97,62	1,0,0	90,110,128	0,6,6	298	149	0.000364441	0.0341301	0.99,1.0,1.0	1.0,0.902,0.914	0.058	up	chr2.3	140748	144403	-	--	--	K09753 cinnamoyl-CoA reductase [EC:1.2.1.44] | (GenBank) cinnamoyl-CoA reductase-like protein (A)	ko00940: Phenylpropanoid biosynthesis; ko01100: Metabolic pathways; ko01110: Biosynthesis of secondary metabolites	XP_013465595.1	CCR1_PETHY RecName: Full=Cinnamoyl-CoA reductase 1 {ECO:0000303|PubMed:24985707, ECO:0000303|PubMed:25217505}; Short=PhCCR1 {ECO:0000303|PubMed:24985707, ECO:0000303|PubMed:25217505}; EC=1.2.1.44 {ECO:0000250|UniProtKB:Q9S9N9}; AltName: Full=Coniferylaldehyde synthase {ECO:0000305}; EC=1.2.1.- {ECO:0000269|PubMed:24985707, ECO:0000269|PubMed:25217505};	At1g15950	GO:0005737,cytoplasm; GO:0016621,cinnamoyl-CoA reductase activity; GO:0000166,nucleotide binding; GO:0007623,circadian rhythm; GO:0010597,green leaf volatile biosynthetic process; GO:0009809,lignin biosynthetic process; GO:0009699,phenylpropanoid biosynthetic process; GO:0003674,molecular_function; GO:0003824,catalytic activity; GO:0016491,oxidoreductase activity; GO:0016620,oxidoreductase activi…	PF01370.21:NAD dependent epimerase/dehydratase family	--	--	--
MS.gene029288	86546247	86546391	86545557	86545769	86547104	86547237	20,88,137	174,135,33	93,135,7	4,8,5	292	149	9.97199e-05	0.012491	0.055,0.25,0.679	0.922,0.896,0.417	-0.417	down	chr1.4	86544531	86547237	-	--	--	K08900 mitochondrial chaperone BCS1 | (RefSeq) AAA-ATPase At3g50940-like (A)	--	XP_013470327.1	--	At4g35110	--	PF05278.12:Arabidopsis phospholipase-like protein (PEARLI 4)	--	--	--
MS.gene002130	74775173	74775338	74774965	74775079	74775881	74775950	95,14,9	0,3,5	149,8,48	0,0,0	298	149	0.0001107	0.0135713	1.0,0.7,0.474	1.0,1.0,1.0	-0.275	down	chr2.3	74772171	74776296	-	--	--	K13114 pinin | (GenBank) protein interaction regulator family protein (A)	ko03013: RNA transport; ko03015: mRNA surveillance pathway	XP_003593098.1	--	At1g15200	GO:0071013,catalytic step 2 spliceosome; GO:0006397,mRNA processing; GO:0008380,RNA splicing; GO:0008152,metabolic process; GO:0006139,nucleobase-containing compound metabolic process; GO:0006396,RNA processing; GO:0006725,cellular aromatic compound metabolic process; GO:0006807,nitrogen compound metabolic process; GO:0008150,biological_process; GO:0009987,cellular process; GO:0010467,gene expres…	PF04696.13:pinin/SDK/memA/ protein conserved region	--	--	--
MS.gene063881	61957219	61957607	61956398	61956640	61958034	61958460	722,149,269	5,0,0	19,159,168	0,12,5	298	149	7.29293e-07	0.000175091	0.986,1.0,1.0	1.0,0.869,0.944	0.058	up	chr8.1	61954130	61958460	+	--	--	K17873 11-oxo-beta-amyrin 30-oxidase [EC:1.14.14.115] | (GenBank) cytochrome P450 family 72 protein (A)	--	XP_003628067.1	C7263_MEDTR RecName: Full=11-oxo-beta-amyrin 30-oxidase; EC=1.14.14.115 {ECO:0000269|PubMed:22128119}; AltName: Full=Cytochrome P450 72A63;	At3g14690	GO:0016021,integral component of membrane; GO:0102375,11-oxo-beta-amyrin 30-oxidase activity; GO:0020037,heme binding; GO:0005506,iron ion binding; GO:0016709,oxidoreductase activity, acting on paired donors, with incorporation or reduction of molecular oxygen, NAD(P)H as one donor, and incorporation of one atom of oxygen; GO:1902382,11-oxo-beta-amyrin catabolic process; GO:1902386,glycyrrhetinat…	PF00067.22:Cytochrome P450	--	--	--
MS.gene008780	34129491	34129542	34129139	34129257	34129686	34129773	68,34,23	12,0,0	14,13,113	0,0,1	199	149	0.000167132	0.0186439	0.809,1.0,1.0	1.0,1.0,0.988	-0.06	down	chr8.1	34125294	34130485	-	--	--	K01937 CTP synthase [EC:6.3.4.2] | (GenBank) CTP synthase-like protein (A)	ko00240: Pyrimidine metabolism; ko01100: Metabolic pathways; ko01240: Biosynthesis of cofactors	XP_003628956.1	--	At1g30820	GO:0005524,ATP binding; GO:0003883,CTP synthase activity; GO:0042802,identical protein binding; GO:0044210,'de novo' CTP biosynthetic process; GO:0006241,CTP biosynthetic process; GO:0006541,glutamine metabolic process; GO:0019856,pyrimidine nucleobase biosynthetic process; GO:0000166,nucleotide binding; GO:0003674,molecular_function; GO:0005488,binding; GO:0008144,drug binding; GO:0017076,purine…	PF06418.14:CTP synthase N-terminus	--	--	--
MS.gene45772	58702404	58702494	58702037	58702250	58703075	58703288	222,54,134	25,0,0	19,18,269	0,0,0	238	149	2.04638e-06	0.000421116	0.848,1.0,1.0	1.0,1.0,1.0	-0.051	down	chr8.3	58700483	58703288	+	--	--	K17098 annexin D | (GenBank) annexin D8 (A)	--	XP_003627774.1	ANXD3_ARATH RecName: Full=Annexin D3; AltName: Full=AnnAt3;	At2g38760	GO:0005737,cytoplasm; GO:0005773,vacuole; GO:0005509,calcium ion binding; GO:0005544,calcium-dependent phospholipid binding; GO:0009409,response to cold; GO:0009408,response to heat; GO:0009651,response to salt stress; GO:0009414,response to water deprivation; GO:0003674,molecular_function; GO:0005488,binding; GO:0046872,metal ion binding; GO:0043167,ion binding; GO:0043169,cation binding; GO:000…	PF00191.20:Annexin	--	--	--
MS.gene96566	46273244	46273561	46272028	46272450	46274168	46274266	1661,1852,2468	4,8,0	301,547,829	0,14,19	298	149	1.0867e-07	2.9817e-05	0.995,0.991,1.0	1.0,0.951,0.956	0.026	up	chr7.3	46272029	46274380	-	--	--	K22762 desumoylating isopeptidase 1 [EC:3.4.-.-] | (GenBank) PPPDE thiol peptidase family protein, putative (A)	--	XP_003622933.1	PPDEX_ARATH RecName: Full=DeSI-like protein At4g17486; EC=3.4.-.-;	At3g07090	GO:0101005,ubiquitinyl hydrolase activity; GO:0016579,protein deubiquitination; GO:0070646,protein modification by small protein removal; GO:0003674,molecular_function; GO:0003824,catalytic activity; GO:0016787,hydrolase activity; GO:0140096,catalytic activity, acting on a protein; GO:0008152,metabolic process; GO:0006464,cellular protein modification process; GO:0006508,proteolysis; GO:0006807,n…	PF05903.14:PPPDE putative peptidase domain	--	--	--
MS.gene033255	20824874	20824952	20824514	20824645	20825193	20825449	30,114,36	8,9,36	68,114,162	0,5,16	226	149	0.000568143	0.0474441	0.712,0.893,0.397	1.0,0.938,0.87	-0.269	down	chr8.4	20824515	20827069	-	--	--	--	--	XP_013457794.1	--	At5g63000	GO:0016021,integral component of membrane; GO:0005739,mitochondrion; GO:0005575,cellular_component; GO:0016020,membrane; GO:0031224,intrinsic component of membrane; GO:0044425,membrane part; GO:0005622,intracellular; GO:0005623,cell; GO:0005737,cytoplasm; GO:0043231,intracellular membrane-bounded organelle; GO:0043226,organelle; GO:0043227,membrane-bounded organelle; GO:0043229,intracellular orga…	PF02466.19:Tim17/Tim22/Tim23/Pmp24 family	--	--	--
MS.gene054314	24511899	24512100	24511182	24511326	24512382	24512529	57,78,0	0,39,105	46,35,56	0,0,0	298	149	1.02313e-08	3.86648e-06	1.0,0.5,0.0	1.0,1.0,1.0	-0.5	down	chr6.1	24511183	24512751	-	--	--	K09489 heat shock 70kDa protein 4 | (GenBank) heat shock 70 kDa protein (A)	--	XP_003617525.2	HSP7Q_ARATH RecName: Full=Heat shock 70 kDa protein 16; AltName: Full=Heat shock protein 70-16; Short=AtHsp70-16;	At1g11660	GO:0005829,cytosol; GO:0005634,nucleus; GO:0005524,ATP binding; GO:0016887,ATPase activity; GO:0000166,nucleotide binding; GO:0003674,molecular_function; GO:0005488,binding; GO:0008144,drug binding; GO:0017076,purine nucleotide binding; GO:0030554,adenyl nucleotide binding; GO:0032553,ribonucleotide binding; GO:0032555,purine ribonucleotide binding; GO:0032559,adenyl ribonucleotide binding; GO:00…	PF00012.20:Hsp70 protein	--	--	--
MS.gene54701	3952910	3953331	3952106	3952139	3953755	3953940	34,10,83	0,1,0	10,25,18	4,6,5	298	149	3.4603e-09	1.42416e-06	1.0,0.833,1.0	0.556,0.676,0.643	0.319	up	chr6.1	3951850	3953940	+	--	--	K03860 phosphatidylinositol N-acetylglucosaminyltransferase subunit Q | (RefSeq) N-acetylglucosaminyl-phosphatidylinositol biosynthetic protein gpi1-like (A)	ko00563: Glycosylphosphatidylinositol (GPI)-anchor biosynthesis; ko01100: Metabolic pathways	XP_013450870.1	GASAE_ARATH RecName: Full=Gibberellin-regulated protein 14; AltName: Full=GAST1 protein homolog 14; Flags: Precursor;	At5g14920	GO:0005576,extracellular region; GO:0005886,plasma membrane; GO:0009536,plastid; GO:0009740,gibberellic acid mediated signaling pathway; GO:2000377,regulation of reactive oxygen species metabolic process; GO:0009737,response to abscisic acid; GO:0009739,response to gibberellin; GO:0009651,response to salt stress; GO:0001101,response to acid chemical; GO:0007165,signal transduction; GO:0007154,cel…	PF02704.14:Gibberellin regulated protein	--	--	--
MS.gene031037	6305579	6305903	6304971	6305131	6306307	6306520	1099,3048,605	88,0,0	996,1874,1530	2,0,1	298	149	3.03068e-09	1.34329e-06	0.862,1.0,1.0	0.996,1.0,0.999	-0.044	down	chr6.2	6304588	6306520	-	--	--	K18980 2-methylene-furan-3-one reductase [EC:1.3.1.105] | (GenBank) zinc-binding dehydrogenase family oxidoreductase (A)	--	XP_003618487.1	ENOXE_FRAAN RecName: Full=2-methylene-furan-3-one reductase; EC=1.3.1.105 {ECO:0000269|PubMed:16517758, ECO:0000269|PubMed:17636940}; AltName: Full=Enone oxidoreductase; Short=FaEO; AltName: Full=Quinone oxidoreductase; Short=FaQR;	At1g23740	GO:0102978,furaneol oxidoreductase activity; GO:0008270,zinc ion binding; GO:0003674,molecular_function; GO:0003824,catalytic activity; GO:0016491,oxidoreductase activity; GO:0016627,oxidoreductase activity, acting on the CH-CH group of donors; GO:0016628,oxidoreductase activity, acting on the CH-CH group of donors, NAD or NADP as acceptor; GO:0005488,binding; GO:0046872,metal ion binding; GO:004…	PF13602.6:Zinc-binding dehydrogenase	--	--	--
MS.gene002657	68710054	68710161	68709800	68709886	68710281	68710344	104,97,35	0,0,0	135,33,75	6,0,5	255	149	0.000432598	0.0380618	1.0,1.0,1.0	0.929,1.0,0.898	0.058	up	chr2.1	68707492	68713652	-	--	--	K06272 integrin-linked kinase [EC:2.7.11.1] | (RefSeq) integrin-linked protein kinase 1 (A)	--	XP_013462623.1	ILK1_ARATH RecName: Full=Integrin-linked protein kinase 1 {ECO:0000303|PubMed:27208244}; EC=2.7.11.1 {ECO:0000269|PubMed:27208244}; AltName: Full=Ankyrin protein kinase 1 {ECO:0000303|PubMed:12650621};	At4g18950	GO:0009898,cytoplasmic side of plasma membrane; GO:0005783,endoplasmic reticulum; GO:0005789,endoplasmic reticulum membrane; GO:0005524,ATP binding; GO:0004672,protein kinase activity; GO:0106310,NA; GO:0004674,protein serine/threonine kinase activity; GO:0004712,protein serine/threonine/tyrosine kinase activity; GO:0106311,NA; GO:0045087,innate immune response; GO:0046777,protein autophosphoryla…	PF07714.17:Protein tyrosine kinase	--	--	--
MS.gene037375	77693913	77693967	77693441	77693716	77694063	77694199	222,129,136	0,4,0	76,45,183	9,5,0	202	149	0.000435974	0.0380618	1.0,0.96,1.0	0.862,0.869,1.0	0.076	up	chr1.3	77693166	77694199	-	--	--	--	--	GAU18093.1	GEML4_ARATH RecName: Full=GEM-like protein 4;	At5g08350	--	PF02893.20:GRAM domain	--	--	--
MS.gene041438	12186153	12186394	12184660	12184866	12186480	12186601	427,400,187	12,18,0	224,1251,163	0,6,0	298	149	1.05909e-07	2.9817e-05	0.947,0.917,1.0	1.0,0.99,1.0	-0.042	down	chr8.2	12184661	12187242	+	--	--	K01953 asparagine synthase (glutamine-hydrolysing) [EC:6.3.5.4] | (RefSeq) asparagine synthetase [glutamine-hydrolyzing] 2-like (A)	ko00250: Alanine, aspartate and glutamate metabolism; ko01100: Metabolic pathways; ko01110: Biosynthesis of secondary metabolites; ko01230: Biosynthesis of amino acids	XP_013458151.1	TSJT1_TOBAC RecName: Full=Stem-specific protein TSJT1;	At5g19140	--	PF12481.8:Aluminium induced protein	--	--	--
MS.gene70153	7574667	7574730	7573783	7573985	7575082	7575275	12,32,285	0,0,38	7,34,5	0,0,0	211	149	1.76308e-05	0.00290253	1.0,1.0,0.841	1.0,1.0,1.0	-0.053	down	chr4.1	7573062	7577396	+	--	--	--	--	XP_013446917.1	MACP2_ARATH RecName: Full=MACPF domain-containing protein At4g24290;	At4g24290	GO:0005886,plasma membrane; GO:0009626,plant-type hypersensitive response; GO:2000031,regulation of salicylic acid mediated signaling pathway; GO:0002376,immune system process; GO:0006952,defense response; GO:0006950,response to stress; GO:0006955,immune response; GO:0008219,cell death; GO:0012501,programmed cell death; GO:0008150,biological_process; GO:0009987,cellular process; GO:0033554,cellul…	PF01823.19:MAC/Perforin domain	--	--	--
MS.gene041043	8960847	8960961	8958396	8958480	8961411	8961474	10,11,1	0,0,0	6,5,7	0,5,3	262	149	6.52164e-06	0.00121218	1.0,1.0,1.0	1.0,0.363,0.57	0.356	up	chr5.1	8958251	8961474	+	--	--	K10577 ubiquitin-conjugating enzyme E2 I | (GenBank) ubiquitin-conjugating enzyme (A)	ko03013: RNA transport; ko04120: Ubiquitin mediated proteolysis	XP_003611678.1	SCE1_ARATH RecName: Full=SUMO-conjugating enzyme SCE1; EC=2.3.2.-; AltName: Full=Protein EMBRYO DEFECTIVE 1637; AltName: Full=Protein hus5 homolog; AltName: Full=SUMO-conjugating enzyme 1; Short=AtSCE1;	At3g57870	GO:0005829,cytosol; GO:0005634,nucleus; GO:0005524,ATP binding; GO:0019900,kinase binding; GO:0061656,SUMO conjugating enzyme activity; GO:0019789,SUMO transferase activity; GO:0009793,embryo development ending in seed dormancy; GO:0016925,protein sumoylation; GO:0009737,response to abscisic acid; GO:0000166,nucleotide binding; GO:0003674,molecular_function; GO:0005488,binding; GO:0008144,drug bi…	PF00179.26:Ubiquitin-conjugating enzyme	--	--	--
MS.gene028194	16162113	16162306	16161282	16161530	16164194	16164452	2,16,30	0,0,0	40,3,9	11,1,3	298	149	1.36977e-08	4.6427e-06	1.0,1.0,1.0	0.645,0.6,0.6	0.385	up	chr4.2	16160859	16164452	+	--	--	K05658 ATP-binding cassette, subfamily B (MDR/TAP), member 1 [EC:7.6.2.2] | (RefSeq) uncharacterized protein LOC111781709 (A)	ko02010: ABC transporters	PNX75134.1	SRG1_ARATH RecName: Full=Protein SRG1; Short=AtSRG1; AltName: Full=Protein SENESCENCE-RELATED GENE 1;	At1g17020	GO:0046872,metal ion binding; GO:0016682,oxidoreductase activity, acting on diphenols and related substances as donors, oxygen as acceptor; GO:0010150,leaf senescence; GO:0003674,molecular_function; GO:0005488,binding; GO:0043167,ion binding; GO:0043169,cation binding; GO:0003824,catalytic activity; GO:0016491,oxidoreductase activity; GO:0016679,oxidoreductase activity, acting on diphenols and re…	PF14226.6:non-haem dioxygenase in morphine synthesis N-terminal	--	--	--
MS.gene49993	75666892	75667103	75666678	75666803	75667317	75667555	112,41,115	9,9,0	1,0,2	1,1,2	298	149	0.000281231	0.0274653	0.862,0.695,1.0	0.333,0.0,0.333	0.63	up	chr1.1	75664751	75668329	+	--	--	K24104 GPN-loop GTPase | (RefSeq) LOW QUALITY PROTEIN: uncharacterized protein LOC104799061 (A)	--	XP_013469909.1	CRK25_ARATH RecName: Full=Cysteine-rich receptor-like protein kinase 25; Short=Cysteine-rich RLK25; EC=2.7.11.-; Flags: Precursor;	At4g05200	GO:0016021,integral component of membrane; GO:0005886,plasma membrane; GO:0005524,ATP binding; GO:0106310,NA; GO:0004674,protein serine/threonine kinase activity; GO:0106311,NA; GO:0042742,defense response to bacterium; GO:0006468,protein phosphorylation; GO:0000166,nucleotide binding; GO:0003674,molecular_function; GO:0005488,binding; GO:0008144,drug binding; GO:0017076,purine nucleotide binding…	PF07714.17:Protein tyrosine kinase	--	--	--
MS.gene037286	79848317	79848386	79846595	79847128	79848529	79848676	21,5,2	0,0,0	19,54,35	0,0,10	217	149	0.000578162	0.047591	1.0,1.0,1.0	1.0,1.0,0.706	0.098	up	chr1.1	79846596	79848883	-	--	--	K09838 zeaxanthin epoxidase [EC:1.14.15.21] | (RefSeq) zeaxanthin epoxidase, chloroplastic (A)	ko00906: Carotenoid biosynthesis; ko01100: Metabolic pathways; ko01110: Biosynthesis of secondary metabolites	XP_013470337.1	MO2_ARATH RecName: Full=Monooxygenase 2 {ECO:0000303|PubMed:10216258}; Short=AtMO2 {ECO:0000303|PubMed:10216258}; EC=1.14.13.-;	At4g38540	GO:0005886,plasma membrane; GO:0071949,FAD binding; GO:0004497,monooxygenase activity; GO:0002239,response to oomycetes; GO:0000166,nucleotide binding; GO:0003674,molecular_function; GO:0005488,binding; GO:0036094,small molecule binding; GO:0043167,ion binding; GO:0043168,anion binding; GO:0048037,cofactor binding; GO:0050660,flavin adenine dinucleotide binding; GO:0050662,coenzyme binding; GO:00…	PF01494.19:FAD binding domain	--	--	--
MS.gene039362	43657117	43657213	43656611	43656704	43657914	43658013	29,136,715	0,4,39	310,103,16	0,0,0	244	149	1.90308e-08	6.09195e-06	1.0,0.954,0.918	1.0,1.0,1.0	-0.043	down	chr6.3	43636834	43660969	+	--	--	K01280 tripeptidyl-peptidase II [EC:3.4.14.10] | (GenBank) tripeptidyl peptidase II (A)	--	XP_013443269.1	TPPII_ARATH RecName: Full=Tripeptidyl-peptidase 2; EC=3.4.14.10; AltName: Full=Tripeptidyl-peptidase II; Short=TPPII;	At4g20850	GO:0009507,chloroplast; GO:0005737,cytoplasm; GO:0005829,cytosol; GO:0022626,cytosolic ribosome; GO:0005774,vacuolar membrane; GO:0005773,vacuole; GO:0004177,aminopeptidase activity; GO:0003729,mRNA binding; GO:0004252,serine-type endopeptidase activity; GO:0008240,tripeptidyl-peptidase activity; GO:0006508,proteolysis; GO:0003674,molecular_function; GO:0003824,catalytic activity; GO:0008233,pept…	PF00082.22:Subtilase family	--	--	--
MS.gene51992	6103929	6104005	6103759	6103809	6104393	6104585	316,233,78	0,0,0	164,224,274	12,2,22	224	149	3.57558e-10	2.06025e-07	1.0,1.0,1.0	0.901,0.987,0.892	0.073	up	chr3.3	6101676	6110495	+	--	--	K12818 ATP-dependent RNA helicase DHX8/PRP22 [EC:3.6.4.13] | (RefSeq) hypothetical protein (A)	ko03040: Spliceosome	XP_003598367.2	ZIF1_ARATH RecName: Full=Protein ZINC INDUCED FACILITATOR 1;	At3g43790	GO:0016021,integral component of membrane; GO:0009705,plant-type vacuole membrane; GO:0005886,plasma membrane; GO:0022821,potassium ion antiporter activity; GO:0090333,regulation of stomatal closure; GO:0009624,response to nematode; GO:0010043,response to zinc ion; GO:0055069,zinc ion homeostasis; GO:0003674,molecular_function; GO:0046873,metal ion transmembrane transporter activity; GO:0005215,t…	PF07690.16:Major Facilitator Superfamily	--	--	--
MS.gene030395	6147151	6147245	6146610	6146679	6147407	6147497	206,198,2326	2,5,0	36,47,69	0,13,8	242	149	5.64238e-12	4.64448e-09	0.984,0.961,1.0	1.0,0.69,0.842	0.138	up	chr4.4	6143231	6149973	+	--	--	K01919 glutamate--cysteine ligase [EC:6.3.2.2] | (GenBank) glutamate-cysteine ligase B (A)	ko00270: Cysteine and methionine metabolism; ko00480: Glutathione metabolism; ko01100: Metabolic pathways; ko01240: Biosynthesis of cofactors	XP_003630512.1	GSH1_MEDTR RecName: Full=Glutamate--cysteine ligase, chloroplastic; EC=6.3.2.2; AltName: Full=Gamma-ECS; Short=GCS; AltName: Full=Gamma-glutamylcysteine synthetase; Flags: Precursor;	At4g23100	GO:0009507,chloroplast; GO:0005524,ATP binding; GO:0004357,glutamate-cysteine ligase activity; GO:0006750,glutathione biosynthetic process; GO:0000166,nucleotide binding; GO:0003674,molecular_function; GO:0005488,binding; GO:0008144,drug binding; GO:0017076,purine nucleotide binding; GO:0030554,adenyl nucleotide binding; GO:0032553,ribonucleotide binding; GO:0032555,purine ribonucleotide binding;…	PF04107.13:Glutamate-cysteine ligase family 2(GCS2)	--	--	--
MS.gene034333	12845156	12845232	12844126	12844194	12845325	12845405	32,61,56	0,0,0	24,31,19	1,2,5	224	149	0.000226533	0.0225049	1.0,1.0,1.0	0.941,0.912,0.717	0.143	up	chr2.4	12840401	12848851	-	--	--	K01681 aconitate hydratase [EC:4.2.1.3] | (GenBank) cytoplasmic-like aconitate hydratase (A)	ko00020: Citrate cycle (TCA cycle); ko00630: Glyoxylate and dicarboxylate metabolism; ko01100: Metabolic pathways; ko01110: Biosynthesis of secondary metabolites; ko01200: Carbon metabolism; ko01210: 2-Oxocarboxylic acid metabolism; ko01230: Biosynthesis of amino acids	XP_003596988.1	ACO3M_ARATH RecName: Full=Aconitate hydratase 3, mitochondrial {ECO:0000303|PubMed:25061985}; Short=Aconitase 3 {ECO:0000303|PubMed:25061985}; Short=mACO1 {ECO:0000303|PubMed:24296071}; EC=4.2.1.3 {ECO:0000250|UniProtKB:P19414}; AltName: Full=Citrate hydro-lyase 3 {ECO:0000303|PubMed:25061985}; Flags: Precursor;	At2g05710	GO:0005618,cell wall; GO:0009507,chloroplast; GO:0009570,chloroplast stroma; GO:0005737,cytoplasm; GO:0005829,cytosol; GO:0005739,mitochondrion; GO:0005774,vacuolar membrane; GO:0051539,4 iron, 4 sulfur cluster binding; GO:0003994,aconitate hydratase activity; GO:0005524,ATP binding; GO:0047780,citrate dehydratase activity; GO:0005507,copper ion binding; GO:0006101,citrate metabolic process; GO:0…	PF00330.20:Aconitase family (aconitate hydratase)	--	--	--
MS.gene79098	74191674	74191786	74189368	74189544	74192324	74192795	4223,4253,3396	122,42,0	838,5163,3817	7,326,82	260	149	7.28306e-14	8.393e-11	0.952,0.983,1.0	0.986,0.901,0.964	0.028	up	chr3.2	74188996	74193395	+	--	--	--	--	XP_003601926.1	GCL1_ARATH RecName: Full=LanC-like protein GCL1; AltName: Full=G protein-coupled receptor 2-like protein 1; Short=Protein GCR2-like 1;	At5g65280	GO:0019898,extrinsic component of membrane; GO:0005886,plasma membrane; GO:0005975,carbohydrate metabolic process; GO:0008152,metabolic process; GO:0008150,biological_process; GO:0044238,primary metabolic process; GO:0071704,organic substance metabolic process; GO:0005575,cellular_component; GO:0016020,membrane; GO:0044425,membrane part; GO:0005623,cell; GO:0044464,cell part; GO:0071944,cell peri…	PF05147.13:Lanthionine synthetase C-like protein	--	--	--
MS.gene030998	5769820	5769983	5769316	5769435	5770438	5770651	647,734,152	3,22,0	343,837,417	0,6,0	298	149	0.000615449	0.049253	0.991,0.943,1.0	1.0,0.986,1.0	-0.017	down	chr6.2	5767543	5771414	+	--	--	K23953 plant cysteine oxidase [EC:1.13.11.-] | (GenBank) 2-aminoethanethiol dioxygenase-like protein (A)	--	XP_013450947.1	PCO2_ARATH RecName: Full=Plant cysteine oxidase 2 {ECO:0000303|PubMed:24599061}; Short=AtPCO2 {ECO:0000303|PubMed:33207269}; EC=1.13.11.20 {ECO:0000269|PubMed:24599061, ECO:0000269|PubMed:29848548, ECO:0000269|PubMed:33207269}; AltName: Full=Hypoxia-responsive unknown protein 43 {ECO:0000303|PubMed:20097791};	At5g39890	GO:0005829,cytosol; GO:0005634,nucleus; GO:0017172,cysteine dioxygenase activity; GO:0046872,metal ion binding; GO:0071456,cellular response to hypoxia; GO:0070483,detection of hypoxia; GO:0018171,peptidyl-cysteine oxidation; GO:0001666,response to hypoxia; GO:0003674,molecular_function; GO:0003824,catalytic activity; GO:0016491,oxidoreductase activity; GO:0016701,oxidoreductase activity, acting …	PF07847.12:PCO_ADO	--	--	--
MS.gene07729	51506382	51506553	51504859	51505093	51512032	51512122	590,150,185	5,19,0	107,0,4	0,39,5	298	149	0.000213674	0.0218682	0.983,0.798,1.0	1.0,0.0,0.286	0.498	up	chr2.4	51503731	51512122	+	--	--	K13422 transcription factor MYC2 | (RefSeq) transcription factor MYC3-like isoform X1 (A)	ko04016: MAPK signaling pathway - plant; ko04075: Plant hormone signal transduction	XP_003595077.1	BH035_ARATH RecName: Full=Transcription factor bHLH35; AltName: Full=Basic helix-loop-helix protein 35; Short=AtbHLH35; Short=bHLH 35; AltName: Full=Transcription factor EN 41; AltName: Full=bHLH transcription factor bHLH035;	At5g57150	GO:0005634,nucleus; GO:0003700,DNA-binding transcription factor activity; GO:0046983,protein dimerization activity; GO:0043565,sequence-specific DNA binding; GO:0006355,regulation of transcription, DNA-templated; GO:0140110,transcription regulator activity; GO:0003674,molecular_function; GO:0005515,protein binding; GO:0005488,binding; GO:0003676,nucleic acid binding; GO:0003677,DNA binding; GO:00…	PF00010.26:Helix-loop-helix DNA-binding domain	bHLH	TF	bHLH
MS.gene26169	57440494	57440556	57440252	57440364	57440718	57441132	29,30,1	0,0,0	27,21,87	6,0,6	210	149	9.49701e-05	0.0121604	1.0,1.0,1.0	0.761,1.0,0.911	0.109	up	chr5.4	57439268	57441986	+	--	--	K12133 MYB-related transcription factor LHY | (RefSeq) protein LHY-like isoform X1 (A)	ko04712: Circadian rhythm - plant	XP_003616176.1	RVE1_ARATH RecName: Full=Protein REVEILLE 1;	At5g17300	GO:0005634,nucleus; GO:0003677,DNA binding; GO:0003700,DNA-binding transcription factor activity; GO:0009734,auxin-activated signaling pathway; GO:0007623,circadian rhythm; GO:0010600,regulation of auxin biosynthetic process; GO:0006355,regulation of transcription, DNA-templated; GO:0003674,molecular_function; GO:0003676,nucleic acid binding; GO:0005488,binding; GO:0097159,organic cyclic compound…	PF00249.31:Myb-like DNA-binding domain	MYB-related	TF	MYB->MYB-related
MS.gene059050	55937750	55937825	55936469	55936535	55938793	55938847	5,10,19	5,0,29	5,2,25	1,0,1	223	149	0.000136092	0.0160033	0.401,1.0,0.304	0.77,1.0,0.944	-0.336	down	chr2.4	55935554	55946100	-	--	--	K00218 protochlorophyllide reductase [EC:1.3.1.33] | (GenBank) NADPH-protochlorophyllide oxidoreductase (A)	ko00860: Porphyrin and chlorophyll metabolism; ko01100: Metabolic pathways; ko01110: Biosynthesis of secondary metabolites	XP_004487684.1	PORB_ARATH RecName: Full=Protochlorophyllide reductase B, chloroplastic; Short=PCR B; EC=1.3.1.33; AltName: Full=NADPH-protochlorophyllide oxidoreductase B; Short=POR B; Flags: Precursor;	At4g27440	GO:0009507,chloroplast; GO:0009941,chloroplast envelope; GO:0009707,chloroplast outer membrane; GO:0009534,chloroplast thylakoid; GO:0009535,chloroplast thylakoid membrane; GO:0005829,cytosol; GO:0003729,mRNA binding; GO:0019904,protein domain specific binding; GO:0016630,protochlorophyllide reductase activity; GO:0015995,chlorophyll biosynthetic process; GO:0015979,photosynthesis; GO:0009723,res…	--	--	--	--
MS.gene056299	76548494	76548566	76548154	76548320	76548791	76548938	369,245,167	0,2,0	65,371,172	0,6,11	220	149	0.000433482	0.0380618	1.0,0.988,1.0	1.0,0.977,0.914	0.032	up	chr1.3	76547104	76549819	-	--	--	K09838 zeaxanthin epoxidase [EC:1.14.15.21] | (RefSeq) zeaxanthin epoxidase, chloroplastic (A)	ko00906: Carotenoid biosynthesis; ko01100: Metabolic pathways; ko01110: Biosynthesis of secondary metabolites	XP_013470337.1	MO3_ARATH RecName: Full=Monooxygenase 3 {ECO:0000303|PubMed:10216258}; Short=AtMO3 {ECO:0000303|PubMed:10216258}; EC=1.14.13.-;	At5g05320	GO:0071949,FAD binding; GO:0004497,monooxygenase activity; GO:0000166,nucleotide binding; GO:0003674,molecular_function; GO:0005488,binding; GO:0036094,small molecule binding; GO:0043167,ion binding; GO:0043168,anion binding; GO:0048037,cofactor binding; GO:0050660,flavin adenine dinucleotide binding; GO:0050662,coenzyme binding; GO:0097159,organic cyclic compound binding; GO:1901265,nucleoside p…	PF01494.19:FAD binding domain	--	--	--
MS.gene056299	76548791	76548938	76548494	76548566	76549739	76549819	209,145,60	1,0,0	64,296,151	0,15,3	295	149	3.63754e-05	0.00523987	0.991,1.0,1.0	1.0,0.909,0.962	0.04	up	chr1.3	76547104	76549819	-	--	--	K09838 zeaxanthin epoxidase [EC:1.14.15.21] | (RefSeq) zeaxanthin epoxidase, chloroplastic (A)	ko00906: Carotenoid biosynthesis; ko01100: Metabolic pathways; ko01110: Biosynthesis of secondary metabolites	XP_013470337.1	MO3_ARATH RecName: Full=Monooxygenase 3 {ECO:0000303|PubMed:10216258}; Short=AtMO3 {ECO:0000303|PubMed:10216258}; EC=1.14.13.-;	At5g05320	GO:0071949,FAD binding; GO:0004497,monooxygenase activity; GO:0000166,nucleotide binding; GO:0003674,molecular_function; GO:0005488,binding; GO:0036094,small molecule binding; GO:0043167,ion binding; GO:0043168,anion binding; GO:0048037,cofactor binding; GO:0050660,flavin adenine dinucleotide binding; GO:0050662,coenzyme binding; GO:0097159,organic cyclic compound binding; GO:1901265,nucleoside p…	PF01494.19:FAD binding domain	--	--	--
MS.gene065325	63750245	63750483	63749593	63749947	63750899	63753352	11,13,36	0,0,18	8,11,25	0,0,0	298	149	0.000206481	0.0216317	1.0,1.0,0.5	1.0,1.0,1.0	-0.167	down	chr4.4	63742471	63754205	+	--	--	K10706 senataxin [EC:3.6.4.-] | (RefSeq) uncharacterized LOC100855072 (A)	--	XP_013442396.1	MAA3_ARATH RecName: Full=Probable helicase MAGATAMA 3; EC=3.6.4.-; AltName: Full=SEN1-like protein;	At1g65780	GO:0005634,nucleus; GO:0005524,ATP binding; GO:0004386,helicase activity; GO:0016787,hydrolase activity; GO:0003723,RNA binding; GO:0009553,embryo sac development; GO:0010183,pollen tube guidance; GO:0009875,pollen-pistil interaction; GO:0000166,nucleotide binding; GO:0003674,molecular_function; GO:0005488,binding; GO:0008144,drug binding; GO:0017076,purine nucleotide binding; GO:0030554,adenyl n…	PF13087.6:AAA domain	--	--	--
MS.gene03130	61236349	61236515	61235707	61236186	61237615	61237807	5059,3533,1756	6,4,86	863,986,1968	0,2,1	298	149	2.89256e-05	0.00427358	0.998,0.998,0.911	1.0,0.996,0.999	-0.029	down	chr2.1	61235708	61238279	-	--	--	K00430 peroxidase [EC:1.11.1.7] | (GenBank) peroxidase family protein (A)	ko00940: Phenylpropanoid biosynthesis; ko01100: Metabolic pathways; ko01110: Biosynthesis of secondary metabolites	AAB41811.1	PER15_IPOBA RecName: Full=Peroxidase 15 {ECO:0000303|PubMed:17936696}; Short=Prx15 {ECO:0000303|PubMed:17936696}; EC=1.11.1.7; AltName: Full=Anionic peroxidase {ECO:0000303|PubMed:17936696}; Flags: Precursor;	At5g06720	GO:0005576,extracellular region; GO:0020037,heme binding; GO:0046872,metal ion binding; GO:0004601,peroxidase activity; GO:0042744,hydrogen peroxide catabolic process; GO:0006979,response to oxidative stress; GO:0003674,molecular_function; GO:0005488,binding; GO:0046906,tetrapyrrole binding; GO:0048037,cofactor binding; GO:0097159,organic cyclic compound binding; GO:1901363,heterocyclic compound …	PF00141.23:Peroxidase	--	--	--
MS.gene74931	76487072	76487144	76486802	76486959	76488034	76488181	1231,991,3594	15,14,0	171,325,319	3,14,13	220	149	1.07365e-08	3.86648e-06	0.982,0.98,1.0	0.975,0.94,0.943	0.035	up	chr1.3	76485809	76492323	-	--	--	K09838 zeaxanthin epoxidase [EC:1.14.15.21] | (RefSeq) zeaxanthin epoxidase, chloroplastic (A)	ko00906: Carotenoid biosynthesis; ko01100: Metabolic pathways; ko01110: Biosynthesis of secondary metabolites	XP_013470337.1	MO2_ARATH RecName: Full=Monooxygenase 2 {ECO:0000303|PubMed:10216258}; Short=AtMO2 {ECO:0000303|PubMed:10216258}; EC=1.14.13.-;	At4g38540	GO:0005886,plasma membrane; GO:0071949,FAD binding; GO:0004497,monooxygenase activity; GO:0002239,response to oomycetes; GO:0000166,nucleotide binding; GO:0003674,molecular_function; GO:0005488,binding; GO:0036094,small molecule binding; GO:0043167,ion binding; GO:0043168,anion binding; GO:0048037,cofactor binding; GO:0050660,flavin adenine dinucleotide binding; GO:0050662,coenzyme binding; GO:00…	PF01494.19:FAD binding domain	--	--	--
MS.gene28625	4699270	4699435	4698687	4698747	4700491	4700674	11,26,61	7,5,0	16,8,20	0,0,0	298	149	1.37633e-05	0.00247825	0.44,0.722,1.0	1.0,1.0,1.0	-0.279	down	chr7.2	4698414	4702426	+	--	--	K15053 charged multivesicular body protein 7 | (GenBank) charged multivesicular body protein (A)	ko04144: Endocytosis	XP_003626081.1	VP321_ARATH RecName: Full=Vacuolar protein sorting-associated protein 32 homolog 1; Short=AtVPS32-1; AltName: Full=Charged multivesicular body protein 4 homolog 1; AltName: Full=ESCRT-III complex subunit VPS32 homolog 1;	At3g62080	GO:0009898,cytoplasmic side of plasma membrane; GO:0000815,ESCRT III complex; GO:0005771,multivesicular body; GO:0005886,plasma membrane; GO:0032511,late endosome to vacuole transport via multivesicular body sorting pathway; GO:0015031,protein transport; GO:0006900,vesicle budding from membrane; GO:0016192,vesicle-mediated transport; GO:0006810,transport; GO:0007034,vacuolar transport; GO:0008150…	PF03357.21:Snf7	--	--	--
MS.gene018202	12107236	12107882	12106480	12106721	12109742	12110021	5223,3098,1777	0,0,0	905,586,1502	0,0,65	298	149	4.6585e-13	4.47371e-10	1.0,1.0,1.0	1.0,1.0,0.92	0.027	up	chr6.3	12106332	12110021	-	--	--	K00318 proline dehydrogenase [EC:1.5.5.2] | (GenBank) proline dehydrogenase (A)	ko00330: Arginine and proline metabolism; ko01100: Metabolic pathways; ko01110: Biosynthesis of secondary metabolites	XP_013451199.1	PROD1_ARATH RecName: Full=Proline dehydrogenase 1, mitochondrial; EC=1.5.5.2; AltName: Full=Osmotic stress-induced proline dehydrogenase; AltName: Full=Proline oxidase; AltName: Full=Protein EARLY RESPONSIVE TO DEHYDRATION 5; Flags: Precursor;	At3g30775	GO:0005739,mitochondrion; GO:0071949,FAD binding; GO:0004657,proline dehydrogenase activity; GO:0071456,cellular response to hypoxia; GO:0042742,defense response to bacterium; GO:0010133,proline catabolic process to glutamate; GO:0006979,response to oxidative stress; GO:0009414,response to water deprivation; GO:0000166,nucleotide binding; GO:0003674,molecular_function; GO:0005488,binding; GO:0036…	PF01619.18:Proline dehydrogenase	--	--	--
MS.gene009281	312207	312386	311000	311103	312891	313239	83,540,429	2,0,0	727,194,227	14,16,10	298	149	7.64447e-10	4.00431e-07	0.954,1.0,1.0	0.963,0.858,0.919	0.071	up	chr3.2	309219	314152	+	--	--	K10999 cellulose synthase A [EC:2.4.1.12] | (RefSeq) cellulose synthase A catalytic subunit 7 [UDP-forming] (A)	--	XP_003598036.1	CSLG2_ARATH RecName: Full=Cellulose synthase-like protein G2; Short=AtCslG2; EC=2.4.1.-;	At4g23990	GO:0000139,Golgi membrane; GO:0016021,integral component of membrane; GO:0005886,plasma membrane; GO:0005802,trans-Golgi network; GO:0016760,cellulose synthase (UDP-forming) activity; GO:0051753,mannan synthase activity; GO:0071555,cell wall organization; GO:0030244,cellulose biosynthetic process; GO:0009833,plant-type primary cell wall biogenesis; GO:0003674,molecular_function; GO:0003824,cataly…	PF03552.14:Cellulose synthase	--	--	--
MS.gene058158	73620450	73620522	73620184	73620313	73620666	73620732	12,18,211	0,0,0	315,44,67	17,6,1	220	149	2.86167e-06	0.000568585	1.0,1.0,1.0	0.926,0.832,0.978	0.088	up	chr1.4	73617999	73622057	+	--	--	K05765 cofilin | (RefSeq) uncharacterized LOC105781290 (A)	--	XP_013469430.1	BH111_ARATH RecName: Full=Transcription factor bHLH111; AltName: Full=Basic helix-loop-helix protein 111; Short=AtbHLH111; Short=bHLH 111; AltName: Full=Transcription factor EN 66; AltName: Full=bHLH transcription factor bHLH111;	At3g20640	GO:0005634,nucleus; GO:0000981,DNA-binding transcription factor activity, RNA polymerase II-specific; GO:0046983,protein dimerization activity; GO:0000978,RNA polymerase II proximal promoter sequence-specific DNA binding; GO:0006357,regulation of transcription by RNA polymerase II; GO:0140110,transcription regulator activity; GO:0003674,molecular_function; GO:0003700,DNA-binding transcription fac…	--	--	--	--
MS.gene062947	35642444	35642615	35641895	35642117	35642942	35643186	733,969,444	0,113,24	749,573,361	0,0,0	298	149	0	0	1.0,0.811,0.902	1.0,1.0,1.0	-0.096	down	chr4.2	35641896	35643539	-	--	--	K22374 3''-deamino-3''-oxonicotianamine reductase [EC:1.1.1.285] | (GenBank) aldo/keto reductase family oxidoreductase (A)	--	XP_003607108.1	MER_ERYCB RecName: Full=Methylecgonone reductase; Short=MecgoR; EC=1.1.1.334;	At1g59950	GO:0047834,D-threo-aldose 1-dehydrogenase activity; GO:1901869,ecgonine methyl ester biosynthetic process; GO:1901868,ecgonine methyl ester catabolic process; GO:1901872,ecgonone methyl ester biosynthetic process; GO:1901871,ecgonone methyl ester catabolic process; GO:0003674,molecular_function; GO:0003824,catalytic activity; GO:0016491,oxidoreductase activity; GO:0016614,oxidoreductase activity,…	PF00248.21:Aldo/keto reductase family	--	--	--
MS.gene001169	67619676	67619738	67619468	67619580	67619919	67620348	85,15,24	0,0,0	3,16,31	0,11,14	210	149	2.38051e-09	1.14304e-06	1.0,1.0,1.0	1.0,0.508,0.611	0.294	up	chr6.1	67617744	67621399	+	--	--	K12133 MYB-related transcription factor LHY | (RefSeq) LHY protein (A)	ko04712: Circadian rhythm - plant	XP_013452818.1	RVE7_ARATH RecName: Full=Protein REVEILLE 7; AltName: Full=Early-phytochrome-responsive 1; AltName: Full=MYB-related transcription factor EPR1;	At1g18330	GO:0005634,nucleus; GO:0003677,DNA binding; GO:0003700,DNA-binding transcription factor activity; GO:0007623,circadian rhythm; GO:0006355,regulation of transcription, DNA-templated; GO:0003674,molecular_function; GO:0003676,nucleic acid binding; GO:0005488,binding; GO:0097159,organic cyclic compound binding; GO:1901363,heterocyclic compound binding; GO:0140110,transcription regulator activity; GO…	PF00249.31:Myb-like DNA-binding domain	MYB-related	TF	MYB->MYB-related
MS.gene29003	62762356	62762471	62762126	62762218	62762704	62762885	78,125,90	1,6,0	117,56,72	21,28,40	263	149	3.01981e-14	5.80004e-11	0.978,0.922,1.0	0.759,0.531,0.505	0.368	up	chr3.1	62760880	62764492	-	--	--	K08287 dual-specificity kinase [EC:2.7.12.1] | (GenBank) kinase AFC1 (A)	--	XP_003601149.1	AFC2_ARATH RecName: Full=Serine/threonine-protein kinase AFC2; EC=2.7.12.1;	At4g24740	GO:0005524,ATP binding; GO:0004672,protein kinase activity; GO:0106310,NA; GO:0004674,protein serine/threonine kinase activity; GO:0004712,protein serine/threonine/tyrosine kinase activity; GO:0106311,NA; GO:0004714,transmembrane receptor protein tyrosine kinase activity; GO:0006397,mRNA processing; GO:0046777,protein autophosphorylation; GO:0000166,nucleotide binding; GO:0003674,molecular_functi…	PF00069.25:Protein kinase domain	--	--	--
MS.gene65114	42775881	42776023	42775656	42775777	42776292	42776482	14,4,144	13,1,0	2,1,4	0,0,0	290	149	0.000307081	0.02949	0.356,0.673,1.0	1.0,1.0,1.0	-0.324	down	chr7.1	42775074	42776482	-	--	--	K08511 vesicle-associated membrane protein 72 | (GenBank) synaptobrevin-like protein (A)	--	XP_003622943.1	VA721_ARATH RecName: Full=Vesicle-associated membrane protein 721 {ECO:0000303|PubMed:11115874}; Short=AtVAMP721 {ECO:0000303|PubMed:11115874}; AltName: Full=v-SNARE synaptobrevin 7B {ECO:0000303|Ref.1}; Short=AtVAMP7B {ECO:0000303|Ref.1};	At1g04750	GO:0009504,cell plate; GO:0031901,early endosome membrane; GO:0005768,endosome; GO:0016021,integral component of membrane; GO:0005886,plasma membrane; GO:0009506,plasmodesma; GO:0009920,cell plate formation involved in plant-type cell wall biogenesis; GO:0072659,protein localization to plasma membrane; GO:0015031,protein transport; GO:0034976,response to endoplasmic reticulum stress; GO:0016192,v…	PF00957.21:Synaptobrevin	--	--	--
MS.gene068856	41528548	41528719	41527050	41527201	41529569	41529678	22,12,0	40,37,43	2,0,0	27,40,8	298	149	1.39441e-06	0.000297578	0.216,0.14,0.0	0.036,0.0,0.0	0.107	up	chr3.2	41524166	41532255	+	--	--	K04460 serine/threonine-protein phosphatase 5 [EC:3.1.3.16] | (GenBank) serine/threonine-protein phosphatase (A)	--	XP_013459748.1	PPP5_SOLLC RecName: Full=Serine/threonine-protein phosphatase 5; EC=3.1.3.16; AltName: Full=LePP5;	At2g42810	GO:0005829,cytosol; GO:0005789,endoplasmic reticulum membrane; GO:0016021,integral component of membrane; GO:0031965,nuclear membrane; GO:0016607,nuclear speck; GO:0005634,nucleus; GO:0046872,metal ion binding; GO:0106306,NA; GO:0004722,protein serine/threonine phosphatase activity; GO:0106307,NA; GO:0003674,molecular_function; GO:0005488,binding; GO:0043167,ion binding; GO:0043169,cation binding…	PF00149.28:Calcineurin-like phosphoesterase	--	--	--
MS.gene066386	32548006	32548129	32547846	32547903	32548290	32548413	525,1512,56	9,37,0	1552,1419,1443	0,0,0	271	149	3.30481e-10	2.06025e-07	0.97,0.957,1.0	1.0,1.0,1.0	-0.024	down	chr5.1	32546520	32548413	-	--	--	K03263 translation initiation factor 5A | (GenBank) eukaryotic translation initiation factor 5A4 (A)	--	XP_003613947.2	IF5A5_SOLTU RecName: Full=Eukaryotic translation initiation factor 5A-5; Short=eIF-5A-5; AltName: Full=eIF-4D;	At1g13950	GO:0043022,ribosome binding; GO:0003746,translation elongation factor activity; GO:0003743,translation initiation factor activity; GO:0045901,positive regulation of translational elongation; GO:0045905,positive regulation of translational termination; GO:0003674,molecular_function; GO:0005488,binding; GO:0043021,ribonucleoprotein complex binding; GO:0044877,protein-containing complex binding; GO:…	PF01287.20:Eukaryotic elongation factor 5A hypusine, DNA-binding OB fold	--	--	--
MS.gene43461	429987	430047	429281	429374	430364	430426	30,34,0	1,0,64	64,16,17	0,0,0	208	149	0.000367245	0.0341301	0.956,1.0,0.0	1.0,1.0,1.0	-0.348	down	chr8.4	429282	431837	-	--	--	K01800 maleylacetoacetate isomerase [EC:5.2.1.2] | (GenBank) glutathione S-transferase tau 5 (A)	ko00350: Tyrosine metabolism; ko01100: Metabolic pathways	XP_013458692.1	GSTZ_EUPES RecName: Full=Glutathione S-transferase zeta class; EC=2.5.1.18;	At2g02380	GO:0005737,cytoplasm; GO:0004364,glutathione transferase activity; GO:0009072,aromatic amino acid family metabolic process; GO:0006749,glutathione metabolic process; GO:0003674,molecular_function; GO:0003824,catalytic activity; GO:0016740,transferase activity; GO:0016765,transferase activity, transferring alkyl or aryl (other than methyl) groups; GO:0008152,metabolic process; GO:0006082,organic a…	PF14497.6:Glutathione S-transferase, C-terminal domain	--	--	--
MS.gene36323	1974740	1974950	1974387	1974562	1976385	1976487	31,67,0	17,4,13	32,46,22	0,2,0	298	149	3.04362e-07	7.62494e-05	0.477,0.893,0.0	1.0,0.92,1.0	-0.517	down	chr2.2	1973348	1979920	-	--	--	K09338 homeobox-leucine zipper protein | (GenBank) homeobox leucine zipper protein (A)	--	XP_003597736.1	HGL2_ARATH RecName: Full=Homeobox-leucine zipper protein GLABRA 2 {ECO:0000305}; Short=Protein GLABRA2 {ECO:0000303|PubMed:7926739}; AltName: Full=HD-ZIP protein ATHB-10 {ECO:0000305}; AltName: Full=Homeobox-leucine zipper protein ATHB-10 {ECO:0000305};	At1g79840	GO:0005634,nucleus; GO:0003677,DNA binding; GO:0000981,DNA-binding transcription factor activity, RNA polymerase II-specific; GO:0008289,lipid binding; GO:0003674,molecular_function; GO:0003676,nucleic acid binding; GO:0005488,binding; GO:0097159,organic cyclic compound binding; GO:1901363,heterocyclic compound binding; GO:0140110,transcription regulator activity; GO:0003700,DNA-binding transcrip…	PF01852.19:START domain	HB-HD-ZIP	TF	HB->HB-HD-ZIP
MS.gene84700	80883418	80883530	80881302	80881478	80884068	80884539	1344,1740,4238	15,26,0	1243,1266,502	27,114,21	260	149	0	0	0.981,0.975,1.0	0.963,0.864,0.932	0.066	up	chr3.4	80880966	80885139	+	--	--	--	--	XP_003601926.1	GCL1_ARATH RecName: Full=LanC-like protein GCL1; AltName: Full=G protein-coupled receptor 2-like protein 1; Short=Protein GCR2-like 1;	At5g65280	GO:0019898,extrinsic component of membrane; GO:0005886,plasma membrane; GO:0005975,carbohydrate metabolic process; GO:0008152,metabolic process; GO:0008150,biological_process; GO:0044238,primary metabolic process; GO:0071704,organic substance metabolic process; GO:0005575,cellular_component; GO:0016020,membrane; GO:0044425,membrane part; GO:0005623,cell; GO:0044464,cell part; GO:0071944,cell peri…	PF05147.13:Lanthionine synthetase C-like protein	--	--	--
MS.gene37074	39721210	39721265	39718649	39719400	39722218	39722285	93,242,182	3,12,0	226,210,108	25,5,18	203	149	0.000117967	0.0141609	0.958,0.937,1.0	0.869,0.969,0.815	0.081	up	chr1.4	39718650	39722285	-	--	--	K00963 UTP--glucose-1-phosphate uridylyltransferase [EC:2.7.7.9] | (RefSeq) UTP--glucose-1-phosphate uridylyltransferase-like (A)	ko00040: Pentose and glucuronate interconversions; ko00052: Galactose metabolism; ko00500: Starch and sucrose metabolism; ko00520: Amino sugar and nucleotide sugar metabolism; ko01100: Metabolic pathways; ko01110: Biosynthesis of secondary metabolites; ko01240: Biosynthesis of cofactors	XP_013467665.1	C3H14_ORYSJ RecName: Full=Zinc finger CCCH domain-containing protein 14; Short=OsC3H14;	At5g06770	GO:0005737,cytoplasm; GO:0005634,nucleus; GO:0003677,DNA binding; GO:0046872,metal ion binding; GO:0003729,mRNA binding; GO:0010468,regulation of gene expression; GO:0003674,molecular_function; GO:0003676,nucleic acid binding; GO:0005488,binding; GO:0097159,organic cyclic compound binding; GO:1901363,heterocyclic compound binding; GO:0043167,ion binding; GO:0043169,cation binding; GO:0003723,RNA …	PF00642.24:Zinc finger C-x8-C-x5-C-x3-H type (and similar)	C3H	TF	C3H
MS.gene37450	91220186	91220251	91217534	91217711	91221676	91221751	21,198,150	1,0,0	75,13,60	9,0,6	213	149	2.38171e-07	6.23791e-05	0.936,1.0,1.0	0.854,1.0,0.875	0.069	up	chr3.4	91214345	91221751	-	--	--	K00826 branched-chain amino acid aminotransferase [EC:2.6.1.42] | (GenBank) branched-chain amino acid aminotransferase (A)	ko00270: Cysteine and methionine metabolism; ko00280: Valine, leucine and isoleucine degradation; ko00290: Valine, leucine and isoleucine biosynthesis; ko00770: Pantothenate and CoA biosynthesis; ko00966: Glucosinolate biosynthesis; ko01100: Metabolic pathways; ko01110: Biosynthesis of secondary metabolites; ko01210: 2-Oxocarboxylic acid metabolism; ko01230: Biosynthesis of amino acids; ko01240: …	XP_013461828.1	BCAT2_ARATH RecName: Full=Branched-chain-amino-acid aminotransferase 2, chloroplastic; Short=Atbcat-2; EC=2.6.1.42; Flags: Precursor;	At1g10070	GO:0009507,chloroplast; GO:0005829,cytosol; GO:0004084,branched-chain-amino-acid transaminase activity; GO:0052656,L-isoleucine transaminase activity; GO:0052654,L-leucine transaminase activity; GO:0050048,L-leucine:2-oxoglutarate aminotransferase activity; GO:0052655,L-valine transaminase activity; GO:0009097,isoleucine biosynthetic process; GO:0009098,leucine biosynthetic process; GO:0071669,pl…	PF01063.19:Amino-transferase class IV	--	--	--
MS.gene037192	48261598	48261664	48260903	48260956	48261842	48261947	3,20,35	0,2,0	4,12,9	0,10,3	214	149	6.08453e-05	0.0083474	1.0,0.874,1.0	1.0,0.455,0.676	0.248	up	chr2.3	48259937	48262495	+	--	--	--	--	XP_013463544.1	--	--	GO:0008080,N-acetyltransferase activity; GO:0003674,molecular_function; GO:0003824,catalytic activity; GO:0016407,acetyltransferase activity; GO:0016410,N-acyltransferase activity; GO:0016740,transferase activity; GO:0016746,transferase activity, transferring acyl groups; GO:0016747,transferase activity, transferring acyl groups other than amino-acyl groups	PF00583.25:Acetyltransferase (GNAT) family	GNAT	TR	GNAT
MS.gene95596	35123457	35123607	35122839	35122980	35123700	35123914	36,177,33	12,7,0	286,231,248	0,0,5	298	149	4.16499e-06	0.000799955	0.6,0.927,1.0	1.0,1.0,0.961	-0.145	down	chr7.4	35122144	35123914	+	--	--	K23978 isoamyl acetate esterase [EC:3.1.1.112] | (GenBank) GDSL-like lipase/acylhydrolase (A)	--	XP_013449138.1	CPR49_ARATH RecName: Full=GDSL esterase/lipase CPRD49; EC=3.1.1.-; AltName: Full=Extracellular lipase CPRD49; Flags: Precursor;	At3g11210	GO:0005576,extracellular region; GO:0016787,hydrolase activity; GO:0016042,lipid catabolic process; GO:0003674,molecular_function; GO:0003824,catalytic activity; GO:0008152,metabolic process; GO:0006629,lipid metabolic process; GO:0008150,biological_process; GO:0009056,catabolic process; GO:0044238,primary metabolic process; GO:0071704,organic substance metabolic process; GO:1901575,organic subst…	PF13472.6:GDSL-like Lipase/Acylhydrolase family	--	--	--
MS.gene79880	65580626	65580698	65579167	65580350	65580996	65581068	9,2,2	8,2,0	27,6,50	0,1,0	220	149	1.94879e-05	0.00303485	0.432,0.404,1.0	1.0,0.803,1.0	-0.322	down	chr3.1	65575005	65583310	+	--	--	--	--	XP_003601656.2	--	At3g07280	--	--	--	--	--
MS.gene015215	9718658	9718760	9718207	9718530	9720468	9721819	148,216,282	0,0,0	132,64,75	12,0,0	250	149	0.000188876	0.0201538	1.0,1.0,1.0	0.868,1.0,1.0	0.044	up	chr5.4	9718208	9721819	+	--	--	K14487 auxin responsive GH3 gene family | (GenBank) indole-3-acetic acid-amido synthetase (A)	ko04075: Plant hormone signal transduction	XP_003611653.1	GH31_ARATH RecName: Full=Probable indole-3-acetic acid-amido synthetase GH3.1; EC=6.3.2.-; AltName: Full=Auxin-responsive GH3-like protein 1; Short=AtGH3-1;	At2g14960	GO:0005737,cytoplasm; GO:0016881,acid-amino acid ligase activity; GO:0009733,response to auxin; GO:0003674,molecular_function; GO:0003824,catalytic activity; GO:0016874,ligase activity; GO:0016879,ligase activity, forming carbon-nitrogen bonds; GO:0008150,biological_process; GO:0009719,response to endogenous stimulus; GO:0009725,response to hormone; GO:0010033,response to organic substance; GO:00…	PF03321.13:GH3 auxin-responsive promoter	--	--	--
MS.gene062559	41879663	41879747	41878863	41878998	41881049	41881174	127,45,34	0,1,0	53,29,80	0,0,12	232	149	0.000147947	0.0170494	1.0,0.967,1.0	1.0,1.0,0.811	0.052	up	chr4.3	41878864	41885171	+	--	--	K00253 isovaleryl-CoA dehydrogenase [EC:1.3.8.4] | (GenBank) acyl-CoA dehydrogenase (A)	ko00280: Valine, leucine and isoleucine degradation; ko01100: Metabolic pathways	XP_003606450.1	IVD_SOLTU RecName: Full=Isovaleryl-CoA dehydrogenase, mitochondrial; Short=IVD; EC=1.3.8.4; AltName: Full=Isovaleryl-CoA dehydrogenase 2; Short=St-IVD2; Flags: Precursor;	At3g45300	GO:0005739,mitochondrion; GO:0050660,flavin adenine dinucleotide binding; GO:0008470,isovaleryl-CoA dehydrogenase activity; GO:1902198,3-methylbut-2-enoyl-CoA(4-) metabolic process; GO:1902196,isovaleryl-CoA(4-) catabolic process; GO:0006552,leucine catabolic process; GO:0000166,nucleotide binding; GO:0003674,molecular_function; GO:0005488,binding; GO:0036094,small molecule binding; GO:0043167,io…	PF00441.24:Acyl-CoA dehydrogenase, C-terminal domain	--	--	--
MS.gene01860	63014399	63014640	63014189	63014310	63019186	63019389	1598,1606,542	0,0,0	1213,1729,1858	8,40,1	298	149	0.000603973	0.0490154	1.0,1.0,1.0	0.987,0.956,0.999	0.019	up	chr2.2	63013170	63019389	-	--	--	K01953 asparagine synthase (glutamine-hydrolysing) [EC:6.3.5.4] | (RefSeq) asparagine synthetase [glutamine-hydrolyzing] 2-like (A)	ko00250: Alanine, aspartate and glutamate metabolism; ko01100: Metabolic pathways; ko01110: Biosynthesis of secondary metabolites; ko01230: Biosynthesis of amino acids	XP_013462754.1	TSJT1_TOBAC RecName: Full=Stem-specific protein TSJT1;	At5g19140	--	PF12481.8:Aluminium induced protein	--	--	--
MS.gene95287	74029841	74029970	74028175	74028261	74030580	74030719	1,1,0	0,0,34	4,4,8	0,0,0	277	149	2.65564e-05	0.00402679	1.0,1.0,0.0	1.0,1.0,1.0	-0.333	down	chr8.1	74027694	74030927	-	--	--	K13459 disease resistance protein RPS2 | (RefSeq) disease resistance protein At4g27190 (A)	ko04626: Plant-pathogen interaction	XP_013444664.1	WRK30_ARATH RecName: Full=Probable WRKY transcription factor 30 {ECO:0000303|PubMed:22268143}; AltName: Full=WRKY DNA-binding protein 30 {ECO:0000303|PubMed:22268143};	At5g24110	GO:0005737,cytoplasm; GO:0005634,nucleus; GO:0003700,DNA-binding transcription factor activity; GO:0000976,transcription regulatory region sequence-specific DNA binding; GO:0010150,leaf senescence; GO:0042542,response to hydrogen peroxide; GO:0010193,response to ozone; GO:0009751,response to salicylic acid; GO:0140110,transcription regulator activity; GO:0003674,molecular_function; GO:0001067,reg…	PF03106.15:WRKY DNA -binding domain	WRKY	TF	WRKY
MS.gene08226	23173101	23173176	23172554	23172626	23173341	23173455	60,6,57	0,4,0	5,5,5	4,5,5	223	149	1.01255e-06	0.000231887	1.0,0.501,1.0	0.455,0.401,0.401	0.415	up	chr7.3	23166832	23177464	-	--	--	K12580 CCR4-NOT transcription complex subunit 3 | (GenBank) transcription regulator NOT2/NOT3/NOT5 family protein (A)	ko03018: RNA degradation	XP_003624606.1	--	At5g18230	GO:0030015,CCR4-NOT core complex; GO:0005634,nucleus; GO:0000932,P-body; GO:0000289,nuclear-transcribed mRNA poly(A) tail shortening; GO:0006355,regulation of transcription, DNA-templated; GO:0000288,nuclear-transcribed mRNA catabolic process, deadenylation-dependent decay; GO:0000956,nuclear-transcribed mRNA catabolic process; GO:0008152,metabolic process; GO:0006139,nucleobase-containing compou…	PF04065.15:Not1 N-terminal domain, CCR4-Not complex component	--	--	--
MS.gene009079	38581041	38581158	38580567	38580614	38581436	38581556	121,169,271	0,0,0	148,80,155	4,3,6	265	149	0.000168255	0.0186439	1.0,1.0,1.0	0.954,0.937,0.936	0.058	up	chr8.1	38578716	38585630	+	--	--	K09680 type II pantothenate kinase [EC:2.7.1.33] | (GenBank) pantothenate kinase (A)	ko00770: Pantothenate and CoA biosynthesis; ko01100: Metabolic pathways; ko01240: Biosynthesis of cofactors	XP_013446004.1	PANK2_ORYSJ RecName: Full=Pantothenate kinase 2 {ECO:0000250|UniProtKB:Q8L5Y9}; AltName: Full=Pantothenic acid kinase 2 {ECO:0000250|UniProtKB:Q8L5Y9}; Includes: RecName: Full=Pantothenate kinase {ECO:0000250|UniProtKB:Q8L5Y9}; EC=2.7.1.33 {ECO:0000250|UniProtKB:Q8L5Y9}; Includes: RecName: Full=4'-phosphopantetheine phosphatase {ECO:0000250|UniProtKB:Q8L5Y9}; EC=3.1.3.- {ECO:0000250|UniProtKB:Q8L…	At4g32180_1	GO:0005829,cytosol; GO:0005634,nucleus; GO:0005524,ATP binding; GO:0016787,hydrolase activity; GO:0046872,metal ion binding; GO:0004594,pantothenate kinase activity; GO:0015937,coenzyme A biosynthetic process; GO:0000166,nucleotide binding; GO:0003674,molecular_function; GO:0005488,binding; GO:0008144,drug binding; GO:0017076,purine nucleotide binding; GO:0030554,adenyl nucleotide binding; GO:003…	PF03630.14:Fumble	--	--	--
MS.gene60310	18673157	18673958	18672201	18672362	18674061	18674278	443,657,24	0,1,0	149,280,330	0,10,8	298	149	5.07489e-05	0.00713208	1.0,0.997,1.0	1.0,0.933,0.954	0.037	up	chr8.2	18671999	18676420	+	--	--	--	--	XP_013457859.1	HIPL1_ARATH RecName: Full=HIPL1 protein; Flags: Precursor;	At1g74790	GO:0031225,anchored component of membrane; GO:0046658,anchored component of plasma membrane; GO:0005739,mitochondrion; GO:0005886,plasma membrane; GO:0016491,oxidoreductase activity; GO:0003674,molecular_function; GO:0003824,catalytic activity; GO:0005575,cellular_component; GO:0016020,membrane; GO:0031224,intrinsic component of membrane; GO:0044425,membrane part; GO:0005623,cell; GO:0031226,intr…	PF07995.11:Glucose / Sorbosone dehydrogenase	--	--	--
MS.gene92991	80277968	80278039	80276165	80276263	80278830	80278907	9,49,2	0,1,0	10,53,22	0,3,6	219	149	0.00047049	0.0404621	1.0,0.971,1.0	1.0,0.923,0.714	0.111	up	chr1.2	80273745	80279190	+	--	--	--	--	XP_013470083.1	CYL2_ARATH RecName: Full=Cyclase-like protein 2 {ECO:0000305}; Flags: Precursor;	At1g44542	GO:0005783,endoplasmic reticulum; GO:0005576,extracellular region; GO:0005794,Golgi apparatus; GO:0005886,plasma membrane; GO:0099503,secretory vesicle; GO:0004061,arylformamidase activity; GO:0019441,tryptophan catabolic process to kynurenine; GO:0003674,molecular_function; GO:0003824,catalytic activity; GO:0016787,hydrolase activity; GO:0016810,hydrolase activity, acting on carbon-nitrogen (but…	PF04199.13:Putative cyclase	--	--	--
MS.gene048804	6024355	6024424	6024185	6024256	6024896	6024990	81,88,5	0,0,0	9,31,97	0,1,9	217	149	0.000216329	0.0218682	1.0,1.0,1.0	1.0,0.955,0.881	0.055	up	chr4.3	6020964	6027725	+	--	--	K01919 glutamate--cysteine ligase [EC:6.3.2.2] | (GenBank) glutamate-cysteine ligase B (A)	ko00270: Cysteine and methionine metabolism; ko00480: Glutathione metabolism; ko01100: Metabolic pathways; ko01240: Biosynthesis of cofactors	XP_003630512.1	GSH1_MEDTR RecName: Full=Glutamate--cysteine ligase, chloroplastic; EC=6.3.2.2; AltName: Full=Gamma-ECS; Short=GCS; AltName: Full=Gamma-glutamylcysteine synthetase; Flags: Precursor;	At4g23100	GO:0009507,chloroplast; GO:0005524,ATP binding; GO:0004357,glutamate-cysteine ligase activity; GO:0006750,glutathione biosynthetic process; GO:0000166,nucleotide binding; GO:0003674,molecular_function; GO:0005488,binding; GO:0008144,drug binding; GO:0017076,purine nucleotide binding; GO:0030554,adenyl nucleotide binding; GO:0032553,ribonucleotide binding; GO:0032555,purine ribonucleotide binding;…	PF04107.13:Glutamate-cysteine ligase family 2(GCS2)	--	--	--
MS.gene60713	71103980	71104043	71101685	71101755	71104662	71105213	0,4,0	19,139,103	0,15,5	36,122,61	211	149	6.32903e-05	0.0084809	0.0,0.02,0.0	0.0,0.08,0.055	-0.038	down	chr1.2	71101686	71105213	-	--	--	--	--	XP_013469608.1	--	At1g22790	--	--	--	--	--
MS.gene028293	17319149	17321873	17317859	17318017	17321970	17322078	8,22,88	0,0,43	14,7,18	0,0,0	298	149	8.97342e-05	0.0117511	1.0,1.0,0.506	1.0,1.0,1.0	-0.165	down	chr4.2	17312517	17326611	-	--	--	K11643 chromodomain-helicase-DNA-binding protein 4 [EC:3.6.4.12] | (RefSeq) CHD3-type chromatin-remodeling factor PICKLE-like (A)	--	XP_003608515.2	CHR4_ARATH RecName: Full=Protein CHROMATIN REMODELING 4 {ECO:0000303|PubMed:16547115}; Short=AtCHR4; EC=3.6.4.-; AltName: Full=Protein PICKLE RELATED 1 {ECO:0000303|PubMed:10570159};	At5g44800	GO:0005634,nucleus; GO:0009506,plasmodesma; GO:0005524,ATP binding; GO:0003677,DNA binding; GO:0004386,helicase activity; GO:0016787,hydrolase activity; GO:0046872,metal ion binding; GO:0070615,nucleosome-dependent ATPase activity; GO:0006325,chromatin organization; GO:0000166,nucleotide binding; GO:0003674,molecular_function; GO:0005488,binding; GO:0008144,drug binding; GO:0017076,purine nucleot…	PF00176.23:SNF2 family N-terminal domain	PHD	TR	PHD
MS.gene017348	59962677	59962739	59962101	59962515	59962869	59962981	299,206,34	38,56,0	133,144,178	33,80,83	210	149	0.000478349	0.040533	0.848,0.723,1.0	0.741,0.561,0.603	0.222	up	chr5.1	59960456	59963928	-	--	--	K12133 MYB-related transcription factor LHY | (RefSeq) protein LHY-like isoform X1 (A)	ko04712: Circadian rhythm - plant	XP_003616176.1	RVE1_ARATH RecName: Full=Protein REVEILLE 1;	At5g17300	GO:0005634,nucleus; GO:0003677,DNA binding; GO:0003700,DNA-binding transcription factor activity; GO:0009734,auxin-activated signaling pathway; GO:0007623,circadian rhythm; GO:0010600,regulation of auxin biosynthetic process; GO:0006355,regulation of transcription, DNA-templated; GO:0003674,molecular_function; GO:0003676,nucleic acid binding; GO:0005488,binding; GO:0097159,organic cyclic compound…	PF00249.31:Myb-like DNA-binding domain	MYB-related	TF	MYB->MYB-related
MS.gene030404	6195953	6196072	6195053	6195221	6196851	6196913	68,65,6	0,0,0	20,86,42	0,15,0	267	149	1.71517e-05	0.00290253	1.0,1.0,1.0	1.0,0.762,1.0	0.079	up	chr4.4	6194937	6197595	-	--	--	K00432 glutathione peroxidase [EC:1.11.1.9] | (GenBank) phospholipid hydroperoxide glutathione peroxidase (A)	ko00480: Glutathione metabolism; ko00590: Arachidonic acid metabolism; ko01100: Metabolic pathways	AFP99878.1	GPX4_CITSI RecName: Full=Probable phospholipid hydroperoxide glutathione peroxidase; Short=PHGPx; EC=1.11.1.12; AltName: Full=Salt-associated protein;	At4g11600	GO:0005737,cytoplasm; GO:0004602,glutathione peroxidase activity; GO:0047066,phospholipid-hydroperoxide glutathione peroxidase activity; GO:0006979,response to oxidative stress; GO:0003674,molecular_function; GO:0003824,catalytic activity; GO:0004601,peroxidase activity; GO:0016491,oxidoreductase activity; GO:0016209,antioxidant activity; GO:0016684,oxidoreductase activity, acting on peroxide as …	PF00255.19:Glutathione peroxidase	--	--	--
MS.gene73644	46648349	46648606	46647426	46647524	46649200	46649652	244,203,78	0,19,0	64,174,214	0,0,0	298	149	1.89727e-05	0.00303485	1.0,0.842,1.0	1.0,1.0,1.0	-0.053	down	chr4.1	46647427	46650264	+	--	--	K22745 apoptosis-inducing factor 2 | (GenBank) pyridine nucleotide-disulfide oxidoreductase family protein (A)	--	XP_013455748.1	NDC1_ARATH RecName: Full=Alternative NAD(P)H-ubiquinone oxidoreductase C1, chloroplastic/mitochondrial {ECO:0000303|PubMed:15333756}; EC=1.6.5.9 {ECO:0000269|PubMed:21844348}; AltName: Full=Alternative NADH dehydrogenase NDC1 {ECO:0000303|PubMed:15333756}; AltName: Full=Demethylphylloquinone reductase NDC1 {ECO:0000303|PubMed:26023160}; EC=1.6.5.12 {ECO:0000269|PubMed:21844348, ECO:0000269|PubMed…	At3g44190	GO:0009507,chloroplast; GO:0005743,mitochondrial inner membrane; GO:0005739,mitochondrion; GO:0010287,plastoglobule; GO:0003955,NAD(P)H dehydrogenase (quinone) activity; GO:0050136,NADH dehydrogenase (quinone) activity; GO:0016491,oxidoreductase activity; GO:0019646,aerobic electron transport chain; GO:0071482,cellular response to light stimulus; GO:0042372,phylloquinone biosynthetic process; GO:…	PF07992.14:Pyridine nucleotide-disulphide oxidoreductase	--	--	--
MS.gene028220	16499221	16499439	16498567	16499124	16499654	16499763	48,147,346	0,1,0	83,104,124	16,1,2	298	149	1.04635e-06	0.000231887	1.0,0.987,1.0	0.722,0.981,0.969	0.105	up	chr4.2	16496603	16499968	-	--	--	K14638 solute carrier family 15 (peptide/histidine transporter), member 3/4 | (RefSeq) protein NRT1/ PTR FAMILY 8.3-like (A)	--	PNY07746.1	PTR2_ARATH RecName: Full=Protein NRT1/ PTR FAMILY 8.3; Short=AtNPF8.3; AltName: Full=Histidine-transporting protein; AltName: Full=Peptide transporter PTR2;	At2g02040	GO:0005794,Golgi apparatus; GO:0016021,integral component of membrane; GO:0000325,plant-type vacuole; GO:0009705,plant-type vacuole membrane; GO:0005774,vacuolar membrane; GO:0005773,vacuole; GO:0071916,dipeptide transmembrane transporter activity; GO:0015334,high-affinity oligopeptide transmembrane transporter activity; GO:0042937,tripeptide transmembrane transporter activity; GO:0042938,dipepti…	PF00854.21:POT family	--	--	--
MS.gene016658	61957624	61957671	61955388	61955698	61957769	61958735	135,128,306	0,0,60	67,176,114	0,1,5	195	149	0.000391867	0.0358403	1.0,1.0,0.796	1.0,0.993,0.946	-0.048	down	chr8.2	61955389	61958735	+	--	--	--	--	XP_003627745.1	--	At4g39140	GO:0016874,ligase activity; GO:0003674,molecular_function; GO:0003824,catalytic activity	PF12678.7:RING-H2 zinc finger domain	--	--	--
MS.gene073805	47068586	47068694	47068266	47068347	47068841	47068918	171,826,25	3,14,0	52,68,38	5,23,10	256	149	7.20535e-14	8.393e-11	0.971,0.972,1.0	0.858,0.632,0.689	0.255	up	chr1.3	47068144	47070452	-	--	--	K00799 glutathione S-transferase [EC:2.5.1.18] | (GenBank) glutathione S-transferase tau (A)	ko00480: Glutathione metabolism; ko01100: Metabolic pathways	XP_013468274.1	GSTL3_ARATH RecName: Full=Glutathione S-transferase L3; Short=AtGSTL3; EC=2.5.1.18; AltName: Full=GST class-lambda member 3;	At5g02790	GO:0005829,cytosol; GO:0005886,plasma membrane; GO:0004364,glutathione transferase activity; GO:0006749,glutathione metabolic process; GO:0010731,protein glutathionylation; GO:0046686,response to cadmium ion; GO:0009636,response to toxic substance; GO:0003674,molecular_function; GO:0003824,catalytic activity; GO:0016740,transferase activity; GO:0016765,transferase activity, transferring alkyl or …	PF13417.6:Glutathione S-transferase, N-terminal domain	--	--	--
MS.gene073805	47069008	47069111	47068586	47068694	47069674	47069773	856,1870,52	0,2,0	32,55,262	0,5,17	251	149	8.77218e-11	6.31816e-08	1.0,0.998,1.0	1.0,0.867,0.901	0.077	up	chr1.3	47068144	47070452	-	--	--	K00799 glutathione S-transferase [EC:2.5.1.18] | (GenBank) glutathione S-transferase tau (A)	ko00480: Glutathione metabolism; ko01100: Metabolic pathways	XP_013468274.1	GSTL3_ARATH RecName: Full=Glutathione S-transferase L3; Short=AtGSTL3; EC=2.5.1.18; AltName: Full=GST class-lambda member 3;	At5g02790	GO:0005829,cytosol; GO:0005886,plasma membrane; GO:0004364,glutathione transferase activity; GO:0006749,glutathione metabolic process; GO:0010731,protein glutathionylation; GO:0046686,response to cadmium ion; GO:0009636,response to toxic substance; GO:0003674,molecular_function; GO:0003824,catalytic activity; GO:0016740,transferase activity; GO:0016765,transferase activity, transferring alkyl or …	PF13417.6:Glutathione S-transferase, N-terminal domain	--	--	--
MS.gene93037	32399982	32400042	32399821	32399896	32400129	32400201	48,70,146	0,0,31	38,38,27	0,0,0	208	149	1.42206e-05	0.00248301	1.0,1.0,0.771	1.0,1.0,1.0	-0.076	down	chr8.2	32395148	32400201	-	--	--	K09060 plant G-box-binding factor | (GenBank) bZIP transcription factor family protein (A)	--	XP_013446233.1	BZP16_ARATH RecName: Full=bZIP transcription factor 16 {ECO:0000305}; Short=AtbZIP16 {ECO:0000303|PubMed:11906833};	At2g35530	GO:0005634,nucleus; GO:0003700,DNA-binding transcription factor activity; GO:0042802,identical protein binding; GO:0043565,sequence-specific DNA binding; GO:0000976,transcription regulatory region sequence-specific DNA binding; GO:0045893,positive regulation of transcription, DNA-templated; GO:0006355,regulation of transcription, DNA-templated; GO:0140110,transcription regulator activity; GO:0003…	PF16596.5:Disordered region downstream of MFMR	bZIP	TF	bZIP
MS.gene53422	32650144	32650320	32649086	32649161	32650651	32650731	95,122,31	0,1,0	13,21,35	0,5,9	298	149	7.65876e-08	2.32262e-05	1.0,0.984,1.0	1.0,0.677,0.66	0.216	up	chr3.3	32649087	32650731	-	--	--	K01640 hydroxymethylglutaryl-CoA lyase [EC:4.1.3.4] | (RefSeq) LOW QUALITY PROTEIN: hydroxymethylglutaryl-CoA lyase, mitochondrial (A)	ko00072: Synthesis and degradation of ketone bodies; ko00280: Valine, leucine and isoleucine degradation; ko00650: Butanoate metabolism; ko01100: Metabolic pathways; ko01110: Biosynthesis of secondary metabolites; ko04146: Peroxisome	XP_013459340.1	FB118_ARATH RecName: Full=F-box protein At2g26850;	At2g41170	--	--	--	--	--
MS.gene007304	10501217	10501295	10500463	10500658	10501384	10501522	61,60,10	0,0,0	50,240,92	0,18,0	226	149	0.000186502	0.0201538	1.0,1.0,1.0	1.0,0.898,1.0	0.034	up	chr7.3	10499634	10504234	-	--	--	K01689 enolase [EC:4.2.1.11] | (GenBank) phosphopyruvate hydratase (A)	ko00010: Glycolysis / Gluconeogenesis; ko01100: Metabolic pathways; ko01110: Biosynthesis of secondary metabolites; ko01200: Carbon metabolism; ko01230: Biosynthesis of amino acids; ko03018: RNA degradation	XP_013450091.1	ENO_RICCO RecName: Full=Enolase; EC=4.2.1.11; AltName: Full=2-phospho-D-glycerate hydro-lyase; AltName: Full=2-phosphoglycerate dehydratase;	At2g36530	GO:0000015,phosphopyruvate hydratase complex; GO:0000287,magnesium ion binding; GO:0004634,phosphopyruvate hydratase activity; GO:0006096,glycolytic process; GO:0003674,molecular_function; GO:0005488,binding; GO:0046872,metal ion binding; GO:0043167,ion binding; GO:0043169,cation binding; GO:0003824,catalytic activity; GO:0016829,lyase activity; GO:0016835,carbon-oxygen lyase activity; GO:0016836…	PF00113.22:Enolase, C-terminal TIM barrel domain	--	--	--
