# Supplementary material for: Genome-wide transcriptomic analysis identifies candidate genes involved in jasmonic acid-mediated salt tolerance of alfalfa
Source: PeerJ. 2023 May 5;11:e15324. doi: 10.7717/peerj.15324 (PMC10166079; doi:10.7717/peerj.15324)
Supplement: Supplemental Information 5 [file peerj-11-15324-s005.xlsx]

## Sheet: up-regulated
gene	group	relative expression	average	STDEV
MS.gene09932	C	1.16901	1.02499	0.261346
		1.18265
		0.723316
	S	3.97164	4.07783	0.106182
		4.18401
		4.07783
	J	8.54306	10.2161	1.67306
		11.8892
		10.2161
	JS	9.00445	7.50932	1.4735
		7.46506
		6.05846
MS.gene024202	C	0.882926	1.03026	0.319915
		1.3973
		0.810562
	S	6.52067	7.18386	1.41649
		8.81029
		6.22062
	J	7.50732	5.53971	1.87092
		5.32837
		3.78343
	JS	10.1196	13.6228	3.77599
		13.1263
		17.6224
MS.gene074091	C	0.923046	1.00321	0.0801615
		1.08337
		1.00321
	S	1.7806	1.84277	0.297164
		1.58161
		2.1661
	J	3.05876	2.87012	0.297216
		2.52751
		3.02409
	JS	5.75412	6.14763	0.934175
		5.47458
		7.21418
MS.gene98636	C	1.04008	1.00077	0.0393101
		1.00077
		0.961462
	S	9.55724	10.1327	2.42413
		12.7928
		8.0481
	J	30.2952	10.3122	17.307
		0.121785
		0.519495
	JS	24.476	21.1056	4.05974
		16.5987
		22.242
novel.17466	C	0.973253	1.00122	0.0611832
		1.07139
		0.959019
	S	2.62827	3.3186	0.66996
		3.36137
		3.96614
	J	4.50466	4.24555	0.589603
		3.57076
		4.66121
	JS	7.89303	6.62604	1.267
		6.62604
		5.35904
MS.gene015472	C	0.830848	1.00907	0.161924
		1.14714
		1.0492
	S	3.55377	3.30716	0.589171
		3.73295
		2.63475
	J	4.4103	4.4103	0.769043
		3.64126
		5.17934
	JS	4.04534	4.27861	0.329883
		4.51187
		4.27861
MS.gene55505	C	0.766251	1.01702	0.21726
		1.14853
		1.13628
	S	9.64975	8.00389	1.42725
		7.25446
		7.10745
	J	2.47014	2.0919	0.36514
		2.06411
		1.74144
	JS	14.3605	13.0878	2.15183
		10.6033
		14.2995
MS.gene73644	C	1.33382	1.02652	0.288113
		0.762493
		0.983254
	S	1.93361	2.48746	0.565106
		3.06319
		2.46559
	J	1.31928	1.32757	0.0444351
		1.28786
		1.37556
	JS	4.07207	4.57598	0.712638
		5.07989
		4.57598
MS.gene011756	C	1.10452	1.00495	0.140826
		0.905367
		1.00495
	S	1.71852	1.64167	0.0861672
		1.65797
		1.54852
	J	1.57231	2.00297	0.604582
		1.74247
		2.69414
	JS	3.68685	3.26827	0.571863
		2.61669
		3.50126
MS.gene00901	C	1.04788	1.00109	0.0661664
		0.954307
		1.00109
	S	3.54936	3.19688	0.415465
		2.73881
		3.30248
	J	1.70884	1.86681	0.264461
		1.71947
		2.17212
	JS	5.24495	6.2803	1.18352
		6.02546
		7.57047

## Sheet: down-regulated
gene	group	relative expression	average	STDEV
MS.gene026605	C	1.45713	1.03817	0.363432
		0.849544
		0.807823
	S	0.640896	0.574666	0.104388
		0.62877
		0.454332
	J	0.589369	0.664235	0.156271
		0.843854
		0.559482
	JS	0.294952	0.234129	0.0535052
		0.194325
		0.21311
MS.gene044274	C	1.02644	1.002	0.076614
		0.916147
		1.06341
	S	0.720396	0.689573	0.0435902
		0.689573
		0.65875
	J	0.333609	0.430799	0.137447
		0.430799
		0.527989
	JS	0.224687	0.256969	0.035587
		0.251089
		0.295129
MS.gene20637	C	0.933642	1.00236	0.0971789
		1.07107
		1.00236
	S	0.748457	0.688389	0.0795507
		0.598171
		0.71854
	J	0.410534	0.438731	0.0776066
		0.526494
		0.379165
	JS	0.412293	0.322566	0.126305
		0.17813
		0.377275
MS.gene21045	C	1.33404	1.02195	0.270619
		0.852333
		0.879472
	S	0.42536	0.410828	0.0129477
		0.406604
		0.40052
	J	0.302679	0.316579	0.0196579
		0.330479
		0.316579
	JS	0.234696	0.249503	0.0209405
		0.249503
		0.26431
MS.gene23769	C	1.01701	1.00087	0.0590911
		0.942955
		1.04266
	S	0.25122	0.214303	0.0522086
		0.177386
		0.214303
	J	0.264077	0.355971	0.129959
		0.447866
		0.355971
	JS	0.0502482	0.0502482	0.0206009
		0.0648153
		0.0356812
MS.gene25137	C	1.1799	1.01371	0.235017
		0.847532
		1.01371
	S	0.347459	0.346694	0.00108089
		0.34593
		0.346694
	J	0.370551	0.368039	0.154527
		0.212271
		0.521294
	JS	0.559683	0.54712	0.0260737
		0.564535
		0.517143
MS.gene52655	C	0.900304	1.00552	0.148798
		1.11074
		1.00552
	S	0.00239527	0.00311979	0.00102461
		0.0038443
		0.00311979
	J	0.00104969	0.00247968	0.00134593
		0.00372182
		0.00266753
	JS	0.00557369	0.00320415	0.00335104
		0.00320415
		0.000834606
MS.gene30384	C	1.37547	1.05125	0.45852
		1.05125
		0.727024
	S	0.149893	0.149893	0.000913764
		0.150539
		0.149247
	J	0.239733	0.305667	0.0583189
		0.35049
		0.326779
	JS	0.0585023	0.0502354	0.00721321
		0.0469822
		0.0452218
MS.gene35105	C	1.34111	0.927599	0.358973
		0.745649
		0.696033
	S	0.17523	0.17523	0.0260174
		0.156833
		0.193627
	J	0.31239	0.355036	0.0893283
		0.295022
		0.457694
	JS	0.0919666	0.118946	0.0240558
		0.13816
		0.12671
MS.gene94790	C	0.865054	1.00544	0.125623
		1.10725
		1.04403
	S	0.0802151	0.0887511	0.015349
		0.106471
		0.0795675
	J	0.361668	0.487252	0.172689
		0.684182
		0.415907
	JS	0.159955	0.151669	0.0202589
		0.12858
		0.166472
