# Supplementary material for: Genome-wide transcriptomic analysis identifies candidate genes involved in jasmonic acid-mediated salt tolerance of alfalfa
Source: PeerJ. 2023 May 5;11:e15324. doi: 10.7717/peerj.15324 (PMC10166079; doi:10.7717/peerj.15324)
Supplement: Supplemental Information 6 [file peerj-11-15324-s006.xlsx]

## Sheet: C vs S
#KEGG_pathway	ko_id	Cluster_frequency	Genome_frequency	P-value	Corrected_P-value	GeneID	KEGG Orthology	hyperlink
Biosynthesis of secondary metabolites	ko01110	509 out of 1658 30.6996381182147%	13283 out of 59392 22.3649649784483%	0	0	MS.gene015472;MS.gene025774;MS.gene025775;MS.gene037761;MS.gene09931;MS.gene22556;MS.gene81782;MS.gene09966;MS.gene007924;MS.gene048897;MS.gene45388;MS.gene56125;MS.gene82779;MS.gene85452;MS.gene002258;MS.gene01231;MS.gene71681;MS.gene03612;MS.gene026652;MS.gene045063;MS.gene040740;MS.gene33199;MS.gene79015;MS.gene049277;MS.gene037762;MS.gene98173;MS.gene88269;MS.gene043145;MS.gene043156;MS.gene4…	K00002+K00002+K00002+K00002+K00002+K00002+K00002+K00016+K00026+K00033+K00036+K00036+K00036+K00058+K00083+K00083+K00083+K00106+K00128+K00128+K00134+K00145+K00161+K00166+K00167+K00215+K00224+K00224+K00224+K00224+K00228+K00232+K00264+K00276+K00276+K00276+K00276+K00382+K00430+K00430+K00430+K00430+K00430+K00430+K00430+K00430+K00430+K00430+K00430+K00430+K00430+K00430+K00430+K00430+K00454+K00475+K00475+…	https:\\www.genome.jp\dbget-bin\www_bget?map01110
Isoflavonoid biosynthesis	ko00943	52 out of 1658 3.13630880579011%	617 out of 59392 1.03886045258621%	0	0	MS.gene59395;MS.gene64687;MS.gene26860;MS.gene024892;MS.gene024894;MS.gene054628;MS.gene39628;MS.gene61690;MS.gene88286;MS.gene93902;MS.gene043142;MS.gene043155;MS.gene060795;MS.gene48634;MS.gene90448;MS.gene011756;MS.gene015210;MS.gene041920;MS.gene09549;MS.gene20250;MS.gene20251;novel.18072;MS.gene019914;MS.gene36007;MS.gene74689;MS.gene91596;MS.gene91611;MS.gene021916;MS.gene35741;MS.gene44630…	K05281+K05281+K13257+K13258+K13258+K13258+K13258+K13258+K13259+K13259+K13259+K13259+K13259+K13259+K13260+K13260+K13260+K13260+K13260+K13260+K13260+K13260+K13263+K13263+K13263+K13264+K13264+K13264+K13264+K13264+K13264+K13264+K13264+K13264+K13264+K13264+K13264+K13265+K13265+K13266+K13267+K13267+K13267+K25075+K25075+K25075+K25075+K25075+K25075+K25075+K25075+K25075	https:\\www.genome.jp\dbget-bin\www_bget?map00943
Cyanoamino acid metabolism	ko00460	54 out of 1658 3.25693606755127%	778 out of 59392 1.30994073275862%	1.46433e-09	1.99149e-07	MS.gene045357;MS.gene003897;MS.gene003900;MS.gene003903;MS.gene032508;MS.gene032510;MS.gene032514;MS.gene032515;MS.gene037448;MS.gene044997;MS.gene044998;MS.gene045001;MS.gene052031;MS.gene05240;MS.gene05242;MS.gene056365;MS.gene062490;MS.gene068807;MS.gene069481;MS.gene25538;MS.gene28358;MS.gene33490;MS.gene33494;MS.gene33496;MS.gene34631;MS.gene37747;MS.gene41335;MS.gene41336;MS.gene41339;MS.ge…	K00600+K01188+K01188+K01188+K01188+K01188+K01188+K01188+K01188+K01188+K01188+K01188+K01188+K01188+K01188+K01188+K01188+K01188+K01188+K01188+K01188+K01188+K01188+K01188+K01188+K01188+K01188+K01188+K01188+K01188+K01188+K01188+K01188+K01188+K01188+K01188+K01188+K01188+K01188+K01188+K01188+K01188+K05349+K05349+K05350+K12153+K13034+K13051+K16266+K16266+K20802+K20802+K20802+K22706	https:\\www.genome.jp\dbget-bin\www_bget?map00460
Ribosome	ko03010	100 out of 1658 6.0313630880579%	1908 out of 59392 3.21255387931034%	2.00448e-09	2.72609e-07	MS.gene065323;MS.gene21219;MS.gene008425;MS.gene049604;MS.gene31405;MS.gene53866;MS.gene59873;MS.gene08870;MS.gene51112;MS.gene004833;MS.gene52972;MS.gene047337;MS.gene95975;MS.gene48046;MS.gene78387;MS.gene07244;MS.gene32737;MS.gene80253;MS.gene002382;novel.12118;MS.gene073466;MS.gene072152;MS.gene36392;MS.gene36570;MS.gene62561;MS.gene99599;MS.gene20153;MS.gene34671;MS.gene004374;MS.gene006251;…	K02863+K02865+K02866+K02866+K02866+K02866+K02868+K02870+K02872+K02875+K02875+K02877+K02882+K02882+K02882+K02885+K02885+K02885+K02898+K02900+K02901+K02903+K02903+K02903+K02905+K02910+K02910+K02915+K02923+K02923+K02923+K02923+K02923+K02923+K02923+K02924+K02925+K02925+K02925+K02925+K02927+K02930+K02930+K02932+K02932+K02934+K02934+K02934+K02935+K02937+K02937+K02937+K02942+K02942+K02943+K02947+K02947+…	https:\\www.genome.jp\dbget-bin\www_bget?map03010
Glycolysis / Gluconeogenesis	ko00010	64 out of 1658 3.86007237635706%	1104 out of 59392 1.85883620689655%	4.96324e-08	6.75e-06	MS.gene015472;MS.gene025774;MS.gene025775;MS.gene037761;MS.gene09931;MS.gene22556;MS.gene81782;MS.gene09966;MS.gene026652;MS.gene045063;MS.gene016051;MS.gene33139;MS.gene040740;MS.gene79015;MS.gene039203;MS.gene36627;MS.gene99339;MS.gene40688;MS.gene87908;MS.gene001737;MS.gene050225;MS.gene053108;MS.gene20006;MS.gene82768;MS.gene070523;MS.gene74185;MS.gene89779;MS.gene95648;MS.gene000484;MS.gene0…	K00002+K00002+K00002+K00002+K00002+K00002+K00002+K00016+K00128+K00128+K00131+K00131+K00134+K00161+K00382+K00844+K00850+K00850+K00873+K00873+K00873+K00873+K00873+K00873+K00895+K00927+K01568+K01568+K01568+K01568+K01568+K01568+K01568+K01568+K01568+K01568+K01568+K01610+K01623+K01623+K01623+K01623+K01623+K01689+K01689+K01689+K01785+K01785+K01792+K01810+K01835+K01913+K03841+K14085+K14085+K15633+K18857+…	https:\\www.genome.jp\dbget-bin\www_bget?map00010
Phenylpropanoid biosynthesis	ko00940	96 out of 1658 5.79010856453559%	2126 out of 59392 3.57960668103448%	3.49359e-06	0.000475129	MS.gene002258;MS.gene01231;MS.gene71681;MS.gene91215;MS.gene001264;MS.gene007014;MS.gene02080;MS.gene03137;MS.gene046114;MS.gene047094;MS.gene047665;MS.gene054277;MS.gene071108;MS.gene24578;MS.gene26287;MS.gene35795;MS.gene42005;MS.gene49485;novel.14644;MS.gene029382;MS.gene011803;MS.gene003897;MS.gene003900;MS.gene003903;MS.gene032508;MS.gene032510;MS.gene032514;MS.gene032515;MS.gene037448;MS.ge…	K00083+K00083+K00083+K00430+K00430+K00430+K00430+K00430+K00430+K00430+K00430+K00430+K00430+K00430+K00430+K00430+K00430+K00430+K00430+K00487+K00588+K01188+K01188+K01188+K01188+K01188+K01188+K01188+K01188+K01188+K01188+K01188+K01188+K01188+K01188+K01188+K01188+K01188+K01188+K01188+K01188+K01188+K01188+K01188+K01188+K01188+K01188+K01188+K01188+K01188+K01188+K01188+K01188+K01188+K01188+K01188+K01188+…	https:\\www.genome.jp\dbget-bin\www_bget?map00940
Biosynthesis of amino acids	ko01230	77 out of 1658 4.64414957780458%	1622 out of 59392 2.73100754310345%	5.81212e-06	0.000790448	MS.gene85452;MS.gene040740;MS.gene33199;MS.gene98173;MS.gene32413;MS.gene87929;MS.gene067854;MS.gene08168;MS.gene41773;MS.gene47318;MS.gene49811;MS.gene045357;MS.gene83782;MS.gene042708;MS.gene000968;MS.gene66256;MS.gene68575;MS.gene71334;MS.gene056428;MS.gene062025;MS.gene32842;MS.gene37450;MS.gene99339;MS.gene40688;novel.10875;MS.gene87908;MS.gene001737;MS.gene050225;MS.gene053108;MS.gene20006;…	K00058+K00134+K00145+K00215+K00264+K00549+K00549+K00549+K00549+K00549+K00549+K00600+K00620+K00620+K00640+K00640+K00640+K00640+K00766+K00789+K00826+K00826+K00850+K00850+K00872+K00873+K00873+K00873+K00873+K00873+K00873+K00891+K00927+K00928+K00930+K00948+K01079+K01079+K01620+K01623+K01623+K01623+K01623+K01623+K01647+K01681+K01689+K01689+K01689+K01696+K01714+K01714+K01714+K01738+K01739+K01739+K01755+…	https:\\www.genome.jp\dbget-bin\www_bget?map01230
Caffeine metabolism	ko00232	5 out of 1658 0.301568154402895%	12 out of 59392 0.0202047413793103%	1.13307e-05	0.00154098	MS.gene03612;MS.gene037926;MS.gene41301;MS.gene43333;MS.gene53739	K00106+K00365+K00365+K00365+K00365	https:\\www.genome.jp\dbget-bin\www_bget?map00232
Metabolic pathways	ko01100	737 out of 1658 44.4511459589867%	23505 out of 59392 39.5760371767241%	2.36226e-05	0.00321267	MS.gene015472;MS.gene025774;MS.gene025775;MS.gene037761;MS.gene09931;MS.gene22556;MS.gene81782;MS.gene30820;MS.gene09966;MS.gene98306;MS.gene29809;MS.gene007924;MS.gene048897;MS.gene45388;MS.gene56125;MS.gene82779;MS.gene85452;MS.gene002258;MS.gene01231;MS.gene71681;MS.gene92334;MS.gene40173;MS.gene03612;MS.gene026652;MS.gene045063;MS.gene016051;MS.gene33139;MS.gene040740;MS.gene33199;MS.gene7901…	K00002+K00002+K00002+K00002+K00002+K00002+K00002+K00008+K00016+K00020+K00020+K00026+K00033+K00036+K00036+K00036+K00058+K00083+K00083+K00083+K00103+K00103+K00106+K00128+K00128+K00131+K00131+K00134+K00145+K00161+K00166+K00167+K00215+K00228+K00232+K00253+K00261+K00264+K00276+K00276+K00276+K00276+K00297+K00297+K00306+K00365+K00365+K00365+K00365+K00382+K00411+K00413+K00423+K00423+K00423+K00430+K00430+…	https:\\www.genome.jp\dbget-bin\www_bget?map01100
alpha-Linolenic acid metabolism	ko00592	29 out of 1658 1.74909529553679%	467 out of 59392 0.786301185344828%	6.56703e-05	0.00893116	MS.gene88269;MS.gene043145;MS.gene043156;MS.gene48618;novel.15707;MS.gene31927;MS.gene42365;MS.gene024838;MS.gene057956;MS.gene21813;MS.gene28210;MS.gene40474;MS.gene022058;MS.gene68895;MS.gene35712;MS.gene54667;MS.gene07270;MS.gene04832;MS.gene21535;MS.gene46313;MS.gene47545;MS.gene013671;MS.gene013678;MS.gene02488;MS.gene02654;MS.gene02655;MS.gene33522;MS.gene81954;MS.gene81957	K00224+K00224+K00224+K00224+K00232+K00454+K01723+K05894+K05894+K05894+K05894+K05894+K10525+K10527+K10528+K10529+K14674+K16818+K16818+K16818+K16818+K18857+K18857+K18857+K18857+K18857+K18857+K18857+K18857	https:\\www.genome.jp\dbget-bin\www_bget?map00592
MAPK signaling pathway - plant	ko04016	123 out of 1658 7.41857659831122%	3102 out of 59392 5.22292564655172%	6.77633e-05	0.00921581	MS.gene28634;MS.gene74407;MS.gene064838;MS.gene94172;MS.gene007847;MS.gene019292;MS.gene023625;MS.gene026903;MS.gene032329;MS.gene049663;MS.gene05388;MS.gene06761;MS.gene32411;MS.gene33890;MS.gene33893;MS.gene38990;MS.gene62307;MS.gene84379;MS.gene006206;MS.gene012503;MS.gene026846;MS.gene035618;MS.gene04593;MS.gene056330;MS.gene49176;MS.gene51623;MS.gene60641;MS.gene85624;MS.gene91878;MS.gene015…	K02183+K02183+K03781+K13416+K13416+K13416+K13416+K13416+K13416+K13416+K13416+K13416+K13416+K13416+K13416+K13416+K13416+K13420+K13420+K13420+K13420+K13420+K13420+K13420+K13420+K13420+K13420+K13422+K13422+K13422+K13422+K13422+K13422+K13422+K13424+K13424+K13424+K13424+K13424+K13424+K13425+K13447+K13447+K13447+K13447+K13447+K13447+K13447+K13449+K13449+K13449+K13449+K14496+K14496+K14497+K14497+K14497+…	https:\\www.genome.jp\dbget-bin\www_bget?map04016
Synthesis and degradation of ketone bodies	ko00072	8 out of 1658 0.482509047044632%	57 out of 59392 0.0959725215517241%	0.000177755	0.0241747	MS.gene020954;MS.gene062514;MS.gene38144;MS.gene013985;MS.gene019054;MS.gene054854;MS.gene53422;MS.gene015517	K00626+K00626+K00626+K01640+K01640+K01640+K01640+K01641	https:\\www.genome.jp\dbget-bin\www_bget?map00072
Starch and sucrose metabolism	ko00500	106 out of 1658 6.39324487334138%	2667 out of 59392 4.49050377155172%	0.000196409	0.0267116	MS.gene85350;MS.gene89909;MS.gene94703;MS.gene95373;MS.gene012174;MS.gene025337;MS.gene025695;MS.gene025697;MS.gene030241;MS.gene037731;MS.gene037739;MS.gene069030;MS.gene069053;MS.gene07013;MS.gene070146;MS.gene22944;MS.gene26624;MS.gene26705;MS.gene28775;MS.gene36006;novel.14221;novel.14708;novel.14737;MS.gene62286;MS.gene36627;MS.gene85276;MS.gene05394;MS.gene30801;MS.gene39893;MS.gene010226;M…	K00695+K00695+K00695+K00695+K00695+K00695+K00695+K00695+K00695+K00695+K00695+K00695+K00695+K00695+K00695+K00695+K00695+K00695+K00695+K00695+K00695+K00695+K00695+K00703+K00844+K00847+K00847+K00847+K00847+K01087+K01176+K01176+K01177+K01177+K01177+K01177+K01179+K01179+K01179+K01179+K01188+K01188+K01188+K01188+K01188+K01188+K01188+K01188+K01188+K01188+K01188+K01188+K01188+K01188+K01188+K01188+K01188+…	https:\\www.genome.jp\dbget-bin\www_bget?map00500
Flavone and flavonol biosynthesis	ko00944	18 out of 1658 1.08564535585042%	250 out of 59392 0.420932112068966%	0.000264746	0.0360054	MS.gene91596;MS.gene91611;MS.gene021916;MS.gene35741;MS.gene44630;MS.gene44643;MS.gene44644;MS.gene46795;MS.gene48578;MS.gene48582;novel.7614;novel.17232;MS.gene007659;MS.gene08632;MS.gene08873;MS.gene92083;MS.gene047378;MS.gene065245	K13264+K13264+K13264+K13264+K13264+K13264+K13264+K13264+K13264+K13264+K13264+K13264+K22772+K22772+K22772+K22794+K22794+K22794	https:\\www.genome.jp\dbget-bin\www_bget?map00944
Pyruvate metabolism	ko00620	38 out of 1658 2.291917973462%	760 out of 59392 1.27963362068966%	0.000486265	0.066132	MS.gene015472;MS.gene025774;MS.gene025775;MS.gene037761;MS.gene09931;MS.gene22556;MS.gene81782;MS.gene09966;MS.gene007924;MS.gene026652;MS.gene045063;MS.gene79015;MS.gene039203;MS.gene020954;MS.gene062514;MS.gene38144;MS.gene87908;MS.gene001737;MS.gene050225;MS.gene053108;MS.gene20006;MS.gene82768;MS.gene060183;MS.gene34099;MS.gene027865;MS.gene05886;MS.gene062120;MS.gene008325;MS.gene057392;nove…	K00002+K00002+K00002+K00002+K00002+K00002+K00002+K00016+K00026+K00128+K00128+K00161+K00382+K00626+K00626+K00626+K00873+K00873+K00873+K00873+K00873+K00873+K01595+K01595+K01610+K01759+K01913+K11262+K14085+K14085+K18857+K18857+K18857+K18857+K18857+K18857+K18857+K18857	https:\\www.genome.jp\dbget-bin\www_bget?map00620
Zeatin biosynthesis	ko00908	24 out of 1658 1.4475271411339%	431 out of 59392 0.725686961206897%	0.00123175	0.167518	MS.gene025468;MS.gene33043;MS.gene34593;MS.gene35542;MS.gene008107;MS.gene032032;MS.gene057369;MS.gene69282;MS.gene57313;MS.gene007576;novel.14890;MS.gene86092;MS.gene86100;MS.gene010192;MS.gene010193;MS.gene021765;MS.gene031146;MS.gene057575;MS.gene057578;MS.gene057582;MS.gene057587;MS.gene057589;MS.gene65928;MS.gene77433	K00279+K00279+K00279+K00279+K13493+K13493+K13493+K13493+K13495+K13496+K13496+K23452+K23452+K23452+K23452+K23452+K23452+K23452+K23452+K23452+K23452+K23452+K23452+K23452	https:\\www.genome.jp\dbget-bin\www_bget?map00908
Valine, leucine and isoleucine degradation	ko00280	24 out of 1658 1.4475271411339%	464 out of 59392 0.78125%	0.00320235	0.43552	MS.gene98306;MS.gene29809;MS.gene026652;MS.gene045063;MS.gene049277;MS.gene037762;MS.gene062559;MS.gene039203;MS.gene020954;MS.gene062514;MS.gene38144;MS.gene32842;MS.gene37450;MS.gene013985;MS.gene019054;MS.gene054854;MS.gene53422;MS.gene015517;MS.gene79025;MS.gene047843;MS.gene015737;MS.gene051489;MS.gene057392;novel.5379	K00020+K00020+K00128+K00128+K00166+K00167+K00253+K00382+K00626+K00626+K00626+K00826+K00826+K01640+K01640+K01640+K01640+K01641+K01968+K01969+K05605+K05605+K14085+K14085	https:\\www.genome.jp\dbget-bin\www_bget?map00280
Glutathione metabolism	ko00480	35 out of 1658 2.11097708082027%	785 out of 59392 1.32172683189655%	0.00507693	0.690463	MS.gene048897;MS.gene45388;MS.gene56125;MS.gene82779;MS.gene030404;novel.15981;MS.gene84554;MS.gene94264;MS.gene94266;MS.gene005690;MS.gene008454;MS.gene008455;MS.gene008456;MS.gene037390;MS.gene039178;MS.gene049573;MS.gene05141;MS.gene05142;MS.gene055150;MS.gene062845;MS.gene063433;MS.gene073804;MS.gene41460;MS.gene46048;MS.gene46055;MS.gene58534;MS.gene77424;MS.gene018098;MS.gene014375;MS.gene6…	K00033+K00036+K00036+K00036+K00432+K00434+K00799+K00799+K00799+K00799+K00799+K00799+K00799+K00799+K00799+K00799+K00799+K00799+K00799+K00799+K00799+K00799+K00799+K00799+K00799+K00799+K00799+K01255+K01581+K01581+K01919+K01919+K10808+K21456+K21888	https:\\www.genome.jp\dbget-bin\www_bget?map00480
Alanine, aspartate and glutamate metabolism	ko00250	22 out of 1658 1.32689987937274%	430 out of 59392 0.724003232758621%	0.00524319	0.713073	MS.gene067808;MS.gene32413;novel.7845;novel.14633;novel.16482;MS.gene038112;MS.gene069679;novel.8822;MS.gene020438;MS.gene00925;MS.gene029728;MS.gene034997;MS.gene47415;MS.gene55312;MS.gene00867;MS.gene01860;MS.gene036617;MS.gene041438;MS.gene57738;MS.gene31332;MS.gene32919;MS.gene75310	K00261+K00264+K00820+K00820+K00820+K00830+K01580+K01580+K01755+K01915+K01915+K01915+K01915+K01940+K01953+K01953+K01953+K01953+K01953+K01955+K13051+K14454	https:\\www.genome.jp\dbget-bin\www_bget?map00250
Fatty acid degradation	ko00071	20 out of 1658 1.20627261761158%	378 out of 59392 0.636449353448276%	0.00526454	0.715978	MS.gene026652;MS.gene045063;novel.15707;MS.gene020954;MS.gene062514;MS.gene38144;MS.gene072680;novel.12503;MS.gene68895;MS.gene057392;novel.5379;MS.gene013671;MS.gene013678;MS.gene02488;MS.gene02654;MS.gene02655;MS.gene33522;MS.gene81954;MS.gene81957;MS.gene51133	K00128+K00128+K00232+K00626+K00626+K00626+K01897+K01897+K10527+K14085+K14085+K18857+K18857+K18857+K18857+K18857+K18857+K18857+K18857+K20495	https:\\www.genome.jp\dbget-bin\www_bget?map00071
Selenocompound metabolism	ko00450	13 out of 1658 0.784077201447527%	206 out of 59392 0.346848060344828%	0.00552493	0.751391	MS.gene032596;MS.gene032598;MS.gene87929;MS.gene067854;MS.gene08168;MS.gene41773;MS.gene47318;MS.gene49811;MS.gene031063;MS.gene62719;MS.gene86824;MS.gene07507;MS.gene77515	K00384+K00384+K00549+K00549+K00549+K00549+K00549+K00549+K01739+K01739+K01761+K01761+K11717	https:\\www.genome.jp\dbget-bin\www_bget?map00450
Monoterpenoid biosynthesis	ko00902	17 out of 1658 1.02533172496984%	311 out of 59392 0.523639547413793%	0.00704168	0.957668	MS.gene001744;MS.gene027816;MS.gene027821;MS.gene027823;MS.gene048392;MS.gene068611;MS.gene068617;MS.gene068618;MS.gene069144;MS.gene070872;MS.gene070881;MS.gene87231;MS.gene026218;MS.gene026227;MS.gene21772;novel.2418;novel.19403	K15095+K23232+K23232+K23232+K23232+K23232+K23232+K23232+K23232+K23232+K23232+K23810+K23810+K23810+K23810+K23810+K23810	https:\\www.genome.jp\dbget-bin\www_bget?map00902
Cysteine and methionine metabolism	ko00270	45 out of 1658 2.71411338962606%	1098 out of 59392 1.8487338362069%	0.00752406	1	MS.gene09966;MS.gene007924;MS.gene85452;MS.gene87929;MS.gene067854;MS.gene08168;MS.gene41773;MS.gene47318;MS.gene49811;novel.1834;MS.gene000968;MS.gene66256;MS.gene68575;MS.gene71334;MS.gene062025;MS.gene032280;MS.gene32842;MS.gene37450;MS.gene65233;MS.gene045356;MS.gene44033;MS.gene031063;MS.gene62719;MS.gene86824;MS.gene07507;MS.gene003901;MS.gene011690;MS.gene015284;MS.gene67293;MS.gene74720;M…	K00016+K00026+K00058+K00549+K00549+K00549+K00549+K00549+K00549+K00558+K00640+K00640+K00640+K00640+K00789+K00815+K00826+K00826+K00928+K01251+K01738+K01739+K01739+K01761+K01761+K01762+K01762+K01762+K01919+K01919+K05933+K05933+K05933+K05933+K05933+K05933+K08967+K13034+K14454+K17398+K20772+K20772+K20772+K20772+K21456	https:\\www.genome.jp\dbget-bin\www_bget?map00270
Carbon metabolism	ko01200	70 out of 1658 4.22195416164053%	1882 out of 59392 3.16877693965517%	0.0100609	1	MS.gene007924;MS.gene048897;MS.gene45388;MS.gene56125;MS.gene82779;MS.gene85452;MS.gene016051;MS.gene33139;MS.gene040740;MS.gene79015;novel.15707;MS.gene067808;MS.gene88638;MS.gene33307;MS.gene039203;MS.gene045357;MS.gene020954;MS.gene062514;MS.gene38144;MS.gene000968;MS.gene66256;MS.gene68575;MS.gene71334;MS.gene038112;MS.gene36627;MS.gene99339;MS.gene40688;MS.gene067384;MS.gene72875;MS.gene8790…	K00026+K00033+K00036+K00036+K00036+K00058+K00131+K00131+K00134+K00161+K00232+K00261+K00297+K00297+K00382+K00600+K00626+K00626+K00626+K00640+K00640+K00640+K00640+K00830+K00844+K00850+K00850+K00855+K00855+K00873+K00873+K00873+K00873+K00873+K00873+K00927+K00948+K01057+K01079+K01079+K01595+K01595+K01601+K01602+K01610+K01623+K01623+K01623+K01623+K01623+K01647+K01681+K01689+K01689+K01689+K01738+K01783+…	https:\\www.genome.jp\dbget-bin\www_bget?map01200
Protein export	ko03060	19 out of 1658 1.145958986731%	378 out of 59392 0.636449353448276%	0.0107244	1	MS.gene78698;MS.gene014661;MS.gene34880;MS.gene24923;MS.gene49126;MS.gene029496;MS.gene81703;MS.gene48841;MS.gene82208;MS.gene048970;MS.gene06113;MS.gene20206;MS.gene55832;MS.gene09040;MS.gene56683;MS.gene46806;MS.gene045844;MS.gene83352;MS.gene07878	K03100+K03104+K03108+K03116+K03116+K03118+K07342+K09481+K09481+K09490+K09490+K09490+K09490+K12946+K12947+K12948+K13280+K13280+K13431	https:\\www.genome.jp\dbget-bin\www_bget?map03060
Butanoate metabolism	ko00650	11 out of 1658 0.663449939686369%	186 out of 59392 0.31317349137931%	0.0159233	1	MS.gene020954;MS.gene062514;MS.gene38144;MS.gene069679;novel.8822;MS.gene013985;MS.gene019054;MS.gene054854;MS.gene53422;MS.gene015517;MS.gene062120	K00626+K00626+K00626+K01580+K01580+K01640+K01640+K01640+K01640+K01641+K01913	https:\\www.genome.jp\dbget-bin\www_bget?map00650
Stilbenoid, diarylheptanoid and gingerol biosynthesis	ko00945	17 out of 1658 1.02533172496984%	342 out of 59392 0.575835129310345%	0.0167453	1	MS.gene029382;MS.gene011803;MS.gene83839;MS.gene042757;MS.gene067823;MS.gene067825;MS.gene08189;MS.gene08190;MS.gene08191;MS.gene41744;MS.gene81667;novel.11905;novel.12459;MS.gene91230;MS.gene006644;MS.gene031663;MS.gene26299	K00487+K00588+K13065+K13065+K13065+K13065+K13065+K13065+K13065+K13065+K13065+K13065+K13065+K16040+K16040+K16040+K16040	https:\\www.genome.jp\dbget-bin\www_bget?map00945
Flavonoid biosynthesis	ko00941	30 out of 1658 1.80940892641737%	720 out of 59392 1.21228448275862%	0.0208043	1	MS.gene89654;MS.gene89655;MS.gene012107;MS.gene017641;MS.gene017642;MS.gene44248;MS.gene44249;MS.gene029382;MS.gene011803;MS.gene006119;MS.gene072476;MS.gene21758;MS.gene21868;MS.gene77512;MS.gene83239;MS.gene97340;MS.gene008742;MS.gene60843;MS.gene83839;MS.gene042757;MS.gene067823;MS.gene067825;MS.gene08189;MS.gene08190;MS.gene08191;MS.gene41744;MS.gene81667;novel.11905;novel.12459;MS.gene56267	K00475+K00475+K00475+K00475+K00475+K00475+K00475+K00487+K00588+K00660+K00660+K00660+K00660+K00660+K00660+K01859+K05278+K08243+K13065+K13065+K13065+K13065+K13065+K13065+K13065+K13065+K13065+K13065+K13065+K22845	https:\\www.genome.jp\dbget-bin\www_bget?map00941
Linoleic acid metabolism	ko00591	13 out of 1658 0.784077201447527%	248 out of 59392 0.417564655172414%	0.0230166	1	MS.gene31927;MS.gene07270;MS.gene011244;MS.gene052709;MS.gene052728;MS.gene074423;MS.gene07829;MS.gene07842;MS.gene07843;MS.gene37354;MS.gene37359;MS.gene80069;novel.18956	K00454+K14674+K15718+K15718+K15718+K15718+K15718+K15718+K15718+K15718+K15718+K15718+K15718	https:\\www.genome.jp\dbget-bin\www_bget?map00591
Carotenoid biosynthesis	ko00906	19 out of 1658 1.145958986731%	411 out of 59392 0.692012392241379%	0.0234868	1	MS.gene063579;MS.gene26193;MS.gene03107;MS.gene037286;MS.gene056298;MS.gene056299;MS.gene065012;MS.gene065017;MS.gene21408;MS.gene74931;MS.gene039190;MS.gene062834;MS.gene063446;MS.gene068670;MS.gene074091;MS.gene74443;MS.gene74449;MS.gene39847;MS.gene42228	K02291+K02291+K09838+K09838+K09838+K09838+K09838+K09838+K09838+K09838+K09840+K09840+K09840+K09840+K09841+K09841+K09841+K09842+K09842	https:\\www.genome.jp\dbget-bin\www_bget?map00906
Glucosinolate biosynthesis	ko00966	8 out of 1658 0.482509047044632%	132 out of 59392 0.222252155172414%	0.0322446	1	MS.gene32842;MS.gene37450;MS.gene35893;MS.gene027547;MS.gene43930;MS.gene43932;MS.gene68300;MS.gene017540	K00826+K00826+K11818+K11820+K11820+K11820+K11820+K12153	https:\\www.genome.jp\dbget-bin\www_bget?map00966
beta-Alanine metabolism	ko00410	16 out of 1658 0.965018094089264%	349 out of 59392 0.587621228448276%	0.0376809	1	MS.gene026652;MS.gene045063;novel.15707;MS.gene035229;MS.gene036587;MS.gene041465;MS.gene46369;MS.gene069679;novel.8822;MS.gene015737;MS.gene051489;MS.gene91853;MS.gene46613;MS.gene057392;novel.5379;novel.14966	K00128+K00128+K00232+K00276+K00276+K00276+K00276+K01580+K01580+K05605+K05605+K13366+K13366+K14085+K14085+K17839	https:\\www.genome.jp\dbget-bin\www_bget?map00410
Arginine biosynthesis	ko00220	12 out of 1658 0.723763570566948%	241 out of 59392 0.405778556034483%	0.0393727	1	MS.gene33199;MS.gene067808;MS.gene83782;MS.gene042708;MS.gene039663;MS.gene020438;MS.gene00925;MS.gene029728;MS.gene034997;MS.gene47415;MS.gene55312;MS.gene75310	K00145+K00261+K00620+K00620+K00930+K01755+K01915+K01915+K01915+K01915+K01940+K14454	https:\\www.genome.jp\dbget-bin\www_bget?map00220
Peroxisome	ko04146	28 out of 1658 1.68878166465621%	719 out of 59392 1.21060075431034%	0.0507214	1	MS.gene03612;novel.15707;MS.gene014720;MS.gene038112;MS.gene050861;MS.gene072459;MS.gene013985;MS.gene019054;MS.gene054854;MS.gene53422;MS.gene072680;novel.12503;MS.gene064838;MS.gene013412;MS.gene041604;MS.gene043402;MS.gene052509;MS.gene23127;MS.gene33765;MS.gene77823;novel.7031;MS.gene023316;MS.gene08917;MS.gene035412;MS.gene38834;MS.gene055847;MS.gene059139;MS.gene66786	K00106+K00232+K00306+K00830+K00869+K00869+K01640+K01640+K01640+K01640+K01897+K01897+K03781+K04564+K08726+K08726+K08726+K08726+K08726+K08726+K08726+K11517+K11517+K13237+K13237+K13348+K13348+K13356	https:\\www.genome.jp\dbget-bin\www_bget?map04146
Plant hormone signal transduction	ko04075	134 out of 1658 8.08202653799759%	4173 out of 59392 7.02619881465517%	0.0509154	1	MS.gene87339;MS.gene87340;MS.gene011868;MS.gene011869;MS.gene013371;MS.gene013448;MS.gene042848;MS.gene064000;MS.gene069811;MS.gene072388;MS.gene28555;MS.gene28580;MS.gene28587;MS.gene44949;MS.gene44950;MS.gene49061;MS.gene94172;MS.gene007847;MS.gene019292;MS.gene023625;MS.gene026903;MS.gene032329;MS.gene049663;MS.gene05388;MS.gene06761;MS.gene32411;MS.gene33890;MS.gene33893;MS.gene38990;MS.gene6…	K13415+K13415+K13415+K13415+K13415+K13415+K13415+K13415+K13415+K13415+K13415+K13415+K13415+K13415+K13415+K13415+K13416+K13416+K13416+K13416+K13416+K13416+K13416+K13416+K13416+K13416+K13416+K13416+K13416+K13416+K13422+K13422+K13422+K13422+K13422+K13422+K13422+K13449+K13449+K13449+K13449+K13463+K13464+K13464+K13464+K13464+K13464+K14431+K14432+K14432+K14484+K14484+K14484+K14484+K14484+K14484+K14484+…	https:\\www.genome.jp\dbget-bin\www_bget?map04075
Propanoate metabolism	ko00640	11 out of 1658 0.663449939686369%	225 out of 59392 0.378838900862069%	0.0524227	1	MS.gene09966;MS.gene049277;MS.gene037762;novel.15707;MS.gene039203;MS.gene020954;MS.gene062514;MS.gene38144;MS.gene015737;MS.gene051489;MS.gene008325	K00016+K00166+K00167+K00232+K00382+K00626+K00626+K00626+K05605+K05605+K11262	https:\\www.genome.jp\dbget-bin\www_bget?map00640
Non-homologous end-joining	ko03450	4 out of 1658 0.241254523522316%	53 out of 59392 0.0892376077586207%	0.060362	1	MS.gene20956;MS.gene54691;MS.gene004812;MS.gene52994	K04799+K10865+K10886+K10886	https:\\www.genome.jp\dbget-bin\www_bget?map03450
Pentose phosphate pathway	ko00030	22 out of 1658 1.32689987937274%	550 out of 59392 0.926050646551724%	0.0608374	1	MS.gene048897;MS.gene45388;MS.gene56125;MS.gene82779;MS.gene016051;MS.gene33139;MS.gene99339;MS.gene40688;MS.gene96007;MS.gene070523;MS.gene39335;MS.gene06861;MS.gene007290;MS.gene009955;MS.gene020547;MS.gene029489;MS.gene44834;MS.gene71518;MS.gene030263;MS.gene010114;MS.gene76011;MS.gene01121	K00033+K00036+K00036+K00036+K00131+K00131+K00850+K00850+K00852+K00895+K00948+K01057+K01623+K01623+K01623+K01623+K01623+K01783+K01807+K01810+K01835+K03841	https:\\www.genome.jp\dbget-bin\www_bget?map00030
Nitrogen metabolism	ko00910	10 out of 1658 0.60313630880579%	214 out of 59392 0.360317887931034%	0.0788723	1	MS.gene067808;MS.gene32413;MS.gene00925;MS.gene029728;MS.gene034997;MS.gene47415;MS.gene050096;MS.gene29049;MS.gene30765;MS.gene35653	K00261+K00264+K01915+K01915+K01915+K01915+K02575+K10534+K10534+K10534	https:\\www.genome.jp\dbget-bin\www_bget?map00910
Tyrosine metabolism	ko00350	24 out of 1658 1.4475271411339%	629 out of 59392 1.05906519396552%	0.0789258	1	MS.gene035229;MS.gene036587;MS.gene041465;MS.gene46369;MS.gene032263;MS.gene017072;MS.gene038288;MS.gene057099;MS.gene48040;MS.gene032280;MS.gene96845;MS.gene80556;MS.gene042064;MS.gene43462;MS.gene43463;MS.gene75310;MS.gene013671;MS.gene013678;MS.gene02488;MS.gene02654;MS.gene02655;MS.gene33522;MS.gene81954;MS.gene81957	K00276+K00276+K00276+K00276+K00451+K00457+K00457+K00457+K00457+K00815+K01593+K01593+K01800+K01800+K01800+K14454+K18857+K18857+K18857+K18857+K18857+K18857+K18857+K18857	https:\\www.genome.jp\dbget-bin\www_bget?map00350
Carbon fixation in photosynthetic organisms	ko00710	19 out of 1658 1.145958986731%	487 out of 59392 0.819975754310345%	0.0922782	1	MS.gene007924;MS.gene040740;MS.gene067384;MS.gene72875;MS.gene74185;MS.gene060183;MS.gene34099;novel.12152;MS.gene070257;MS.gene027865;MS.gene007290;MS.gene009955;MS.gene020547;MS.gene029489;MS.gene44834;MS.gene71518;MS.gene030263;MS.gene01121;MS.gene75310	K00026+K00134+K00855+K00855+K00927+K01595+K01595+K01601+K01602+K01610+K01623+K01623+K01623+K01623+K01623+K01783+K01807+K03841+K14454	https:\\www.genome.jp\dbget-bin\www_bget?map00710
Circadian rhythm - plant	ko04712	23 out of 1658 1.38721351025332%	620 out of 59392 1.04391163793103%	0.104911	1	MS.gene006119;MS.gene072476;MS.gene21758;MS.gene21868;MS.gene77512;MS.gene83239;MS.gene025560;MS.gene73995;MS.gene61253;MS.gene053401;MS.gene013498;MS.gene06605;MS.gene067335;MS.gene06818;MS.gene08517;MS.gene041701;MS.gene073796;MS.gene80553;MS.gene044331;MS.gene033131;MS.gene047202;MS.gene021729;MS.gene55256	K00660+K00660+K00660+K00660+K00660+K00660+K03097+K03097+K03115+K12119+K12130+K12130+K12130+K12130+K12130+K12133+K12133+K12133+K12135+K16221+K16221+K16222+K16222	https:\\www.genome.jp\dbget-bin\www_bget?map04712
Photosynthesis	ko00195	12 out of 1658 0.723763570566948%	285 out of 59392 0.479862607758621%	0.105197	1	MS.gene01156;MS.gene047073;MS.gene047074;MS.gene071935;MS.gene071937;MS.gene03847;MS.gene76234;MS.gene02098;MS.gene03071;MS.gene011898;MS.gene04833;MS.gene006895	K02634+K02634+K02634+K02634+K02634+K02639+K02639+K02641+K02641+K02716+K02721+K08906	https:\\www.genome.jp\dbget-bin\www_bget?map00195
Polyketide sugar unit biosynthesis	ko00523	1 out of 1658 0.060313630880579%	5 out of 59392 0.00841864224137931%	0.132007	1	MS.gene62816	K12451	https:\\www.genome.jp\dbget-bin\www_bget?map00523
Lysine biosynthesis	ko00300	6 out of 1658 0.361881785283474%	125 out of 59392 0.210466056034483%	0.137957	1	MS.gene98173;MS.gene65233;MS.gene051156;MS.gene23548;MS.gene23665;MS.gene053635	K00215+K00928+K01714+K01714+K01714+K10206	https:\\www.genome.jp\dbget-bin\www_bget?map00300
Sulfur metabolism	ko00920	10 out of 1658 0.60313630880579%	242 out of 59392 0.407462284482759%	0.142182	1	MS.gene000968;MS.gene66256;MS.gene68575;MS.gene71334;MS.gene01744;MS.gene02315;MS.gene44033;MS.gene031063;MS.gene62719;MS.gene054826	K00640+K00640+K00640+K00640+K01082+K01082+K01738+K01739+K01739+K13034	https:\\www.genome.jp\dbget-bin\www_bget?map00920
Arachidonic acid metabolism	ko00590	10 out of 1658 0.60313630880579%	248 out of 59392 0.417564655172414%	0.158434	1	MS.gene030404;MS.gene041604;MS.gene043402;MS.gene052509;MS.gene23127;MS.gene33765;MS.gene77823;novel.7031;MS.gene07270;MS.gene22974	K00432+K08726+K08726+K08726+K08726+K08726+K08726+K08726+K14674+K15730	https:\\www.genome.jp\dbget-bin\www_bget?map00590
Steroid biosynthesis	ko00100	9 out of 1658 0.542822677925211%	219 out of 59392 0.368736530172414%	0.161458	1	MS.gene028532;MS.gene053633;MS.gene029609;MS.gene04776;MS.gene055353;MS.gene002745;MS.gene004434;MS.gene011475;MS.gene07270	K00511+K00511+K01052+K01052+K05917+K09832+K09832+K14423+K14674	https:\\www.genome.jp\dbget-bin\www_bget?map00100
2-Oxocarboxylic acid metabolism	ko01210	16 out of 1658 0.965018094089264%	437 out of 59392 0.735789331896552%	0.166552	1	MS.gene33199;MS.gene83782;MS.gene042708;MS.gene32842;MS.gene37450;MS.gene65233;MS.gene039663;MS.gene82594;MS.gene83717;MS.gene35893;MS.gene027547;MS.gene43930;MS.gene43932;MS.gene68300;MS.gene017540;MS.gene75310	K00145+K00620+K00620+K00826+K00826+K00928+K00930+K01647+K01681+K11818+K11820+K11820+K11820+K11820+K12153+K14454	https:\\www.genome.jp\dbget-bin\www_bget?map01210
Monobactam biosynthesis	ko00261	5 out of 1658 0.301568154402895%	108 out of 59392 0.181842672413793%	0.184716	1	MS.gene98173;MS.gene65233;MS.gene051156;MS.gene23548;MS.gene23665	K00215+K00928+K01714+K01714+K01714	https:\\www.genome.jp\dbget-bin\www_bget?map00261
Sesquiterpenoid and triterpenoid biosynthesis	ko00909	11 out of 1658 0.663449939686369%	289 out of 59392 0.486597521551724%	0.187633	1	MS.gene028532;MS.gene053633;MS.gene042108;MS.gene88992;MS.gene042759;MS.gene042764;MS.gene042766;MS.gene062678;MS.gene062695;MS.gene87166;MS.gene053114	K00511+K00511+K15472+K15803+K15803+K15803+K15803+K15803+K15803+K15813+K15813	https:\\www.genome.jp\dbget-bin\www_bget?map00909
Tropane, piperidine and pyridine alkaloid biosynthesis	ko00960	9 out of 1658 0.542822677925211%	230 out of 59392 0.387257543103448%	0.196101	1	MS.gene035229;MS.gene036587;MS.gene041465;MS.gene46369;MS.gene032280;MS.gene003992;MS.gene30551;MS.gene41122;MS.gene75310	K00276+K00276+K00276+K00276+K00815+K08081+K08081+K08081+K14454	https:\\www.genome.jp\dbget-bin\www_bget?map00960
Lysine degradation	ko00310	14 out of 1658 0.844390832328106%	398 out of 59392 0.670123922413793%	0.225897	1	MS.gene026652;MS.gene045063;MS.gene014720;MS.gene039203;MS.gene020954;MS.gene062514;MS.gene38144;MS.gene041177;MS.gene006801;MS.gene057392;novel.5379;MS.gene030228;MS.gene063742;MS.gene063747	K00128+K00128+K00306+K00382+K00626+K00626+K00626+K11420+K11426+K14085+K14085+K14157+K14157+K14157	https:\\www.genome.jp\dbget-bin\www_bget?map00310
Purine metabolism	ko00230	27 out of 1658 1.62846803377563%	841 out of 59392 1.416015625%	0.255769	1	MS.gene03612;MS.gene037926;MS.gene41301;MS.gene43333;MS.gene53739;MS.gene064488;MS.gene87908;MS.gene001737;MS.gene050225;MS.gene053108;MS.gene20006;MS.gene82768;MS.gene39335;MS.gene002414;MS.gene66300;MS.gene049618;MS.gene76011;MS.gene72132;MS.gene34752;MS.gene067775;MS.gene41694;MS.gene41695;MS.gene41697;MS.gene51898;MS.gene51901;MS.gene51906;MS.gene51941	K00106+K00365+K00365+K00365+K00365+K00856+K00873+K00873+K00873+K00873+K00873+K00873+K00948+K01466+K01513+K01522+K01835+K01951+K10808+K14641+K14641+K14641+K14641+K14641+K14641+K14641+K14641	https:\\www.genome.jp\dbget-bin\www_bget?map00230
Histidine metabolism	ko00340	6 out of 1658 0.361881785283474%	154 out of 59392 0.259294181034483%	0.261355	1	MS.gene026652;MS.gene045063;MS.gene057392;novel.5379;MS.gene44222;MS.gene78214	K00128+K00128+K14085+K14085+K14152+K14152	https:\\www.genome.jp\dbget-bin\www_bget?map00340
Glycerolipid metabolism	ko00561	27 out of 1658 1.62846803377563%	846 out of 59392 1.42443426724138%	0.265535	1	MS.gene015472;MS.gene025774;MS.gene025775;MS.gene037761;MS.gene09931;MS.gene22556;MS.gene81782;MS.gene026652;MS.gene045063;MS.gene00623;MS.gene025341;MS.gene45329;MS.gene93966;MS.gene022183;MS.gene042920;MS.gene07220;MS.gene72035;MS.gene72606;MS.gene004947;MS.gene06516;MS.gene07479;MS.gene57350;MS.gene62805;MS.gene057392;novel.5379;MS.gene07270;MS.gene89091	K00002+K00002+K00002+K00002+K00002+K00002+K00002+K00128+K00128+K00655+K00679+K00901+K01054+K01054+K01054+K01054+K01054+K01054+K07407+K07407+K07407+K07407+K13519+K14085+K14085+K14674+K15918	https:\\www.genome.jp\dbget-bin\www_bget?map00561
Glyoxylate and dicarboxylate metabolism	ko00630	22 out of 1658 1.32689987937274%	682 out of 59392 1.14830280172414%	0.274436	1	MS.gene007924;MS.gene039203;MS.gene045357;MS.gene020954;MS.gene062514;MS.gene38144;MS.gene038112;novel.12152;MS.gene070257;MS.gene82594;MS.gene83717;MS.gene062120;MS.gene00925;MS.gene029728;MS.gene034997;MS.gene47415;MS.gene064838;MS.gene023316;MS.gene08917;MS.gene89091;MS.gene008970;MS.gene053603	K00026+K00382+K00600+K00626+K00626+K00626+K00830+K01601+K01602+K01647+K01681+K01913+K01915+K01915+K01915+K01915+K03781+K11517+K11517+K15918+K22133+K22133	https:\\www.genome.jp\dbget-bin\www_bget?map00630
Various types of N-glycan biosynthesis	ko00513	9 out of 1658 0.542822677925211%	253 out of 59392 0.425983297413793%	0.277092	1	MS.gene92004;MS.gene002661;MS.gene001355;MS.gene93138;MS.gene37721;MS.gene051057;MS.gene051061;MS.gene074471;MS.gene86220	K01230+K01230+K03845+K07151+K07151+K07441+K07441+K07441+K12666	https:\\www.genome.jp\dbget-bin\www_bget?map00513
Aflatoxin biosynthesis	ko00254	1 out of 1658 0.060313630880579%	12 out of 59392 0.0202047413793103%	0.288081	1	MS.gene008325	K11262	https:\\www.genome.jp\dbget-bin\www_bget?map00254
Porphyrin and chlorophyll metabolism	ko00860	11 out of 1658 0.663449939686369%	322 out of 59392 0.542160560344828%	0.290657	1	MS.gene017491;MS.gene054622;MS.gene32824;MS.gene051518;MS.gene044387;MS.gene37837;MS.gene007749;MS.gene03712;MS.gene049757;MS.gene09137;MS.gene013720	K00228+K01719+K01772+K03405+K10960+K10960+K13071+K13071+K13071+K13071+K22013	https:\\www.genome.jp\dbget-bin\www_bget?map00860
Lipoic acid metabolism	ko00785	1 out of 1658 0.060313630880579%	14 out of 59392 0.0235721982758621%	0.327283	1	MS.gene31510	K03644	https:\\www.genome.jp\dbget-bin\www_bget?map00785
Protein processing in endoplasmic reticulum	ko04141	81 out of 1658 4.8854041013269%	2763 out of 59392 4.65214170258621%	0.34002	1	MS.gene92004;MS.gene002661;MS.gene93602;MS.gene93616;MS.gene026032;MS.gene026033;MS.gene050523;MS.gene43137;MS.gene99106;MS.gene004054;MS.gene021101;MS.gene032563;MS.gene035612;MS.gene046736;MS.gene054073;MS.gene055753;MS.gene061881;MS.gene061885;MS.gene066121;MS.gene74077;novel.10030;novel.11440;MS.gene004599;MS.gene020834;MS.gene029661;MS.gene037253;MS.gene040499;MS.gene30654;MS.gene38261;MS.ge…	K01230+K01230+K01456+K01456+K01456+K01456+K01456+K01456+K03283+K03283+K03283+K03283+K03283+K03283+K03283+K03283+K03283+K03283+K03283+K03283+K03283+K03283+K03347+K04079+K04079+K04079+K04079+K04079+K04079+K04079+K04079+K04079+K04374+K06689+K06689+K06689+K07151+K07151+K07342+K07953+K08054+K08057+K08852+K09481+K09481+K09486+K09487+K09487+K09490+K09490+K09490+K09490+K09503+K09517+K09523+K09561+K09580+…	https:\\www.genome.jp\dbget-bin\www_bget?map04141
Glycosphingolipid biosynthesis - globo and isoglobo series	ko00603	4 out of 1658 0.241254523522316%	110 out of 59392 0.185210129310345%	0.368843	1	MS.gene004947;MS.gene06516;MS.gene07479;MS.gene57350	K07407+K07407+K07407+K07407	https:\\www.genome.jp\dbget-bin\www_bget?map00603
Arginine and proline metabolism	ko00330	14 out of 1658 0.844390832328106%	451 out of 59392 0.759361530172414%	0.381171	1	MS.gene026652;MS.gene045063;MS.gene93973;MS.gene012154;MS.gene017589;MS.gene44198;MS.gene014375;MS.gene69356;MS.gene91853;MS.gene46613;MS.gene057392;novel.5379;MS.gene75310;novel.14966	K00128+K00128+K00472+K00472+K00472+K00472+K01581+K01581+K13366+K13366+K14085+K14085+K14454+K17839	https:\\www.genome.jp\dbget-bin\www_bget?map00330
Biosynthesis of cofactors	ko01240	56 out of 1658 3.37756332931242%	1918 out of 59392 3.2293911637931%	0.384073	1	MS.gene015472;MS.gene025774;MS.gene025775;MS.gene037761;MS.gene09931;MS.gene22556;MS.gene81782;MS.gene92334;MS.gene40173;MS.gene026652;MS.gene045063;MS.gene017491;MS.gene039203;MS.gene017072;MS.gene038288;MS.gene057099;MS.gene48040;MS.gene045357;MS.gene038600;MS.gene066790;MS.gene062025;MS.gene32842;MS.gene37450;MS.gene031787;MS.gene87908;MS.gene001737;MS.gene050225;MS.gene053108;MS.gene20006;MS.…	K00002+K00002+K00002+K00002+K00002+K00002+K00002+K00103+K00103+K00128+K00128+K00228+K00382+K00457+K00457+K00457+K00457+K00600+K00606+K00763+K00789+K00826+K00826+K00858+K00873+K00873+K00873+K00873+K00873+K00873+K00949+K01495+K01495+K01719+K01772+K01919+K01919+K01955+K02372+K02372+K03644+K03809+K03809+K03809+K04487+K06215+K09458+K11153+K11153+K11153+K11752+K13248+K14652+K14652+K20457+K21456	https:\\www.genome.jp\dbget-bin\www_bget?map01240
Taurine and hypotaurine metabolism	ko00430	2 out of 1658 0.120627261761158%	54 out of 59392 0.0909213362068965%	0.447144	1	MS.gene069679;novel.8822	K01580+K01580	https:\\www.genome.jp\dbget-bin\www_bget?map00430
Fructose and mannose metabolism	ko00051	19 out of 1658 1.145958986731%	652 out of 59392 1.09779094827586%	0.456948	1	MS.gene30820;MS.gene36627;MS.gene85276;MS.gene05394;MS.gene30801;MS.gene39893;MS.gene99339;MS.gene40688;MS.gene070523;MS.gene007290;MS.gene009955;MS.gene020547;MS.gene029489;MS.gene44834;MS.gene012427;MS.gene23920;MS.gene57906;MS.gene01121;MS.gene025489	K00008+K00844+K00847+K00847+K00847+K00847+K00850+K00850+K00895+K01623+K01623+K01623+K01623+K01623+K01805+K01805+K01805+K03841+K19355	https:\\www.genome.jp\dbget-bin\www_bget?map00051
Terpenoid backbone biosynthesis	ko00900	12 out of 1658 0.723763570566948%	405 out of 59392 0.681910021551724%	0.457845	1	MS.gene020954;MS.gene062514;MS.gene38144;MS.gene050861;MS.gene072459;MS.gene06732;MS.gene74964;MS.gene015517;MS.gene024034;MS.gene044387;MS.gene37837;MS.gene004535	K00626+K00626+K00626+K00869+K00869+K00938+K01597+K01641+K01823+K10960+K10960+K15889	https:\\www.genome.jp\dbget-bin\www_bget?map00900
Citrate cycle (TCA cycle)	ko00020	9 out of 1658 0.542822677925211%	301 out of 59392 0.506802262931034%	0.464409	1	MS.gene007924;MS.gene79015;MS.gene039203;MS.gene027865;MS.gene82594;MS.gene00158;MS.gene55991;MS.gene60923;MS.gene83717	K00026+K00161+K00382+K01610+K01647+K01648+K01648+K01648+K01681	https:\\www.genome.jp\dbget-bin\www_bget?map00020
Glycosylphosphatidylinositol (GPI)-anchor biosynthesis	ko00563	8 out of 1658 0.482509047044632%	268 out of 59392 0.451239224137931%	0.473807	1	novel.17067;MS.gene00476;MS.gene044087;MS.gene24451;MS.gene57122;MS.gene030194;MS.gene030195;MS.gene23698	K03434+K03860+K03860+K03860+K03860+K05288+K05288+K05291	https:\\www.genome.jp\dbget-bin\www_bget?map00563
Ascorbate and aldarate metabolism	ko00053	21 out of 1658 1.26658624849216%	730 out of 59392 1.22912176724138%	0.475189	1	MS.gene015472;MS.gene025774;MS.gene025775;MS.gene037761;MS.gene09931;MS.gene22556;MS.gene81782;MS.gene92334;MS.gene40173;MS.gene026652;MS.gene045063;MS.gene022246;MS.gene074404;MS.gene08002;novel.15981;MS.gene029672;novel.15683;novel.15686;MS.gene057392;novel.5379;MS.gene066446	K00002+K00002+K00002+K00002+K00002+K00002+K00002+K00103+K00103+K00128+K00128+K00423+K00423+K00423+K00434+K00469+K12447+K12447+K14085+K14085+K21888	https:\\www.genome.jp\dbget-bin\www_bget?map00053
Glycine, serine and threonine metabolism	ko00260	21 out of 1658 1.26658624849216%	731 out of 59392 1.23080549568966%	0.47771	1	MS.gene85452;MS.gene035229;MS.gene036587;MS.gene041465;MS.gene46369;MS.gene014720;MS.gene039203;MS.gene045357;MS.gene038112;novel.10875;MS.gene65233;MS.gene93499;MS.gene28223;MS.gene036422;MS.gene94351;MS.gene35996;MS.gene38836;MS.gene057392;novel.5379;MS.gene92802;MS.gene89091	K00058+K00276+K00276+K00276+K00276+K00306+K00382+K00600+K00830+K00872+K00928+K01079+K01079+K01620+K01696+K12235+K12235+K14085+K14085+K15633+K15918	https:\\www.genome.jp\dbget-bin\www_bget?map00260
Phosphatidylinositol signaling system	ko04070	19 out of 1658 1.145958986731%	661 out of 59392 1.11294450431034%	0.480858	1	novel.6350;MS.gene036000;MS.gene45329;MS.gene009017;MS.gene027593;MS.gene44366;MS.gene28634;MS.gene74407;MS.gene009843;MS.gene057348;MS.gene62159;MS.gene85461;MS.gene023719;MS.gene029676;MS.gene66860;MS.gene92508;MS.gene073527;MS.gene28394;MS.gene054339	K00888+K00889+K00901+K00913+K00914+K00914+K02183+K02183+K05857+K05857+K05857+K10572+K10572+K13711+K13711+K18081+K18081+K19801+K20279	https:\\www.genome.jp\dbget-bin\www_bget?map04070
ABC transporters	ko02010	30 out of 1658 1.80940892641737%	1054 out of 59392 1.77464978448276%	0.482799	1	MS.gene000231;MS.gene00336;MS.gene004835;MS.gene055238;MS.gene26775;MS.gene62111;MS.gene65654;MS.gene75390;MS.gene00300;MS.gene004562;MS.gene05831;MS.gene36548;MS.gene52407;MS.gene52408;MS.gene94826;MS.gene006196;MS.gene066239;MS.gene59189;MS.gene74722;MS.gene74730;MS.gene83362;MS.gene018629;MS.gene33949;MS.gene34098;MS.gene89083;MS.gene96946;MS.gene23413;MS.gene33328;MS.gene51575;MS.gene83365	K05658+K05658+K05658+K05658+K05658+K05658+K05658+K05658+K05665+K05665+K05665+K05665+K05665+K05665+K05666+K05666+K05666+K05666+K05666+K05666+K05666+K05681+K05681+K05681+K08711+K08711+K08711+K08711+K08711+K08711	https:\\www.genome.jp\dbget-bin\www_bget?map02010
Riboflavin metabolism	ko00740	5 out of 1658 0.301568154402895%	167 out of 59392 0.281182650862069%	0.500257	1	MS.gene66300;MS.gene36906;MS.gene08350;MS.gene002218;MS.gene02178	K01513+K11752+K14379+K14652+K14652	https:\\www.genome.jp\dbget-bin\www_bget?map00740
Inositol phosphate metabolism	ko00562	20 out of 1658 1.20627261761158%	729 out of 59392 1.2274380387931%	0.563007	1	MS.gene029672;novel.6350;MS.gene036000;MS.gene009017;MS.gene027593;MS.gene44366;MS.gene045096;MS.gene052224;MS.gene75459;MS.gene009843;MS.gene057348;MS.gene62159;MS.gene85461;MS.gene023719;MS.gene029676;MS.gene66860;MS.gene92508;MS.gene073527;MS.gene28394;MS.gene054339	K00469+K00888+K00889+K00913+K00914+K00914+K01858+K01858+K01858+K05857+K05857+K05857+K10572+K10572+K13711+K13711+K18081+K18081+K19801+K20279	https:\\www.genome.jp\dbget-bin\www_bget?map00562
N-Glycan biosynthesis	ko00510	10 out of 1658 0.60313630880579%	366 out of 59392 0.616244612068966%	0.571515	1	MS.gene065390;MS.gene92004;MS.gene002661;MS.gene001355;MS.gene93138;MS.gene37721;MS.gene051057;MS.gene051061;MS.gene074471;MS.gene86220	K00779+K01230+K01230+K03845+K07151+K07151+K07441+K07441+K07441+K12666	https:\\www.genome.jp\dbget-bin\www_bget?map00510
Neomycin, kanamycin and gentamicin biosynthesis	ko00524	1 out of 1658 0.060313630880579%	30 out of 59392 0.0505118534482759%	0.572418	1	MS.gene36627	K00844	https:\\www.genome.jp\dbget-bin\www_bget?map00524
Ubiquinone and other terpenoid-quinone biosynthesis	ko00130	11 out of 1658 0.663449939686369%	406 out of 59392 0.68359375%	0.58203	1	MS.gene017072;MS.gene038288;MS.gene057099;MS.gene48040;MS.gene029382;MS.gene032280;MS.gene004713;MS.gene35477;MS.gene90442;MS.gene01301;MS.gene045927	K00457+K00457+K00457+K00457+K00487+K00815+K01904+K01904+K03809+K03809+K03809	https:\\www.genome.jp\dbget-bin\www_bget?map00130
Limonene and pinene degradation	ko00903	2 out of 1658 0.120627261761158%	70 out of 59392 0.11786099137931%	0.585331	1	MS.gene026652;MS.gene045063	K00128+K00128	https:\\www.genome.jp\dbget-bin\www_bget?map00903
Phagosome	ko04145	15 out of 1658 0.904704463208685%	555 out of 59392 0.934469288793103%	0.586727	1	MS.gene027593;MS.gene44366;MS.gene24154;MS.gene029270;MS.gene64799;MS.gene81703;MS.gene037642;MS.gene42253;MS.gene49099;MS.gene017310;MS.gene33386;MS.gene049179;MS.gene40797;MS.gene48841;MS.gene82208	K00914+K00914+K01365+K02147+K04392+K07342+K07375+K07375+K07375+K07889+K07897+K08054+K08057+K09481+K09481	https:\\www.genome.jp\dbget-bin\www_bget?map04145
Vitamin B6 metabolism	ko00750	3 out of 1658 0.180940892641737%	111 out of 59392 0.186893857758621%	0.602146	1	MS.gene019151;MS.gene01623;MS.gene011159	K05275+K06215+K13248	https:\\www.genome.jp\dbget-bin\www_bget?map00750
SNARE interactions in vesicular transport	ko04130	8 out of 1658 0.482509047044632%	307 out of 59392 0.51690463362069%	0.626806	1	MS.gene005331;novel.5754;novel.198;MS.gene70948;MS.gene49320;novel.3531;MS.gene45033;MS.gene48358	K08486+K08486+K08493+K08503+K08504+K08504+K08506+K08516	https:\\www.genome.jp\dbget-bin\www_bget?map04130
Pyrimidine metabolism	ko00240	13 out of 1658 0.784077201447527%	498 out of 59392 0.838496767241379%	0.635349	1	MS.gene05712;MS.gene66300;MS.gene05092;MS.gene31332;MS.gene34752;MS.gene067775;MS.gene41694;MS.gene41695;MS.gene41697;MS.gene51898;MS.gene51901;MS.gene51906;MS.gene51941	K00876+K01513+K01520+K01955+K10808+K14641+K14641+K14641+K14641+K14641+K14641+K14641+K14641	https:\\www.genome.jp\dbget-bin\www_bget?map00240
Fatty acid metabolism	ko01212	14 out of 1658 0.844390832328106%	537 out of 59392 0.904162176724138%	0.639492	1	novel.15707;MS.gene020954;MS.gene062514;MS.gene38144;MS.gene072680;novel.12503;MS.gene051345;MS.gene70381;MS.gene026689;MS.gene31844;MS.gene32324;MS.gene028308;MS.gene68895;MS.gene008325	K00232+K00626+K00626+K00626+K01897+K01897+K02372+K02372+K03921+K03921+K03921+K09458+K10527+K11262	https:\\www.genome.jp\dbget-bin\www_bget?map01212
Galactose metabolism	ko00052	28 out of 1658 1.68878166465621%	1069 out of 59392 1.7999057112069%	0.661137	1	MS.gene36627;MS.gene99339;MS.gene40688;MS.gene051946;MS.gene063886;MS.gene33019;MS.gene33489;MS.gene000930;MS.gene000931;MS.gene21669;MS.gene033138;MS.gene043259;MS.gene76011;MS.gene020850;MS.gene29069;MS.gene81266;MS.gene004947;MS.gene06516;MS.gene07479;MS.gene57350;MS.gene011186;MS.gene012072;MS.gene026070;novel.15683;novel.15686;MS.gene84642;MS.gene21047;MS.gene40759	K00844+K00850+K00850+K01193+K01193+K01193+K01193+K01784+K01784+K01784+K01785+K01785+K01835+K06617+K06617+K06617+K07407+K07407+K07407+K07407+K12309+K12309+K12309+K12447+K12447+K18819+K18819+K18819	https:\\www.genome.jp\dbget-bin\www_bget?map00052
Phenylalanine, tyrosine and tryptophan biosynthesis	ko00400	7 out of 1658 0.422195416164053%	285 out of 59392 0.479862607758621%	0.68524	1	MS.gene056428;MS.gene032280;MS.gene67031;MS.gene94351;MS.gene068978;MS.gene75310;MS.gene58292	K00766+K00815+K00891+K01696+K01850+K14454+K15227	https:\\www.genome.jp\dbget-bin\www_bget?map00400
Phosphonate and phosphinate metabolism	ko00440	2 out of 1658 0.120627261761158%	85 out of 59392 0.143116918103448%	0.690115	1	MS.gene053932;MS.gene43935	K00993+K00993	https:\\www.genome.jp\dbget-bin\www_bget?map00440
Tryptophan metabolism	ko00380	22 out of 1658 1.32689987937274%	868 out of 59392 1.46147629310345%	0.707141	1	MS.gene026652;MS.gene045063;MS.gene039203;MS.gene020954;MS.gene062514;MS.gene38144;MS.gene96845;MS.gene80556;MS.gene064838;MS.gene91718;MS.gene47176;MS.gene35893;MS.gene027547;MS.gene43930;MS.gene43932;MS.gene68300;MS.gene020937;MS.gene38109;MS.gene057392;novel.5379;MS.gene24883;MS.gene61660	K00128+K00128+K00382+K00626+K00626+K00626+K01593+K01593+K03781+K11816+K11816+K11818+K11820+K11820+K11820+K11820+K13066+K13066+K14085+K14085+K23947+K23947	https:\\www.genome.jp\dbget-bin\www_bget?map00380
Fatty acid biosynthesis	ko00061	9 out of 1658 0.542822677925211%	370 out of 59392 0.622979525862069%	0.707211	1	MS.gene072680;novel.12503;MS.gene051345;MS.gene70381;MS.gene026689;MS.gene31844;MS.gene32324;MS.gene028308;MS.gene008325	K01897+K01897+K02372+K02372+K03921+K03921+K03921+K09458+K11262	https:\\www.genome.jp\dbget-bin\www_bget?map00061
Biosynthesis of unsaturated fatty acids	ko01040	4 out of 1658 0.241254523522316%	172 out of 59392 0.289601293103448%	0.71027	1	novel.15707;MS.gene026689;MS.gene31844;MS.gene32324	K00232+K03921+K03921+K03921	https:\\www.genome.jp\dbget-bin\www_bget?map01040
Other types of O-glycan biosynthesis	ko00514	3 out of 1658 0.180940892641737%	132 out of 59392 0.222252155172414%	0.716387	1	MS.gene065390;MS.gene001799;MS.gene50057	K00779+K13667+K20783	https:\\www.genome.jp\dbget-bin\www_bget?map00514
Photosynthesis - antenna proteins	ko00196	2 out of 1658 0.120627261761158%	93 out of 59392 0.156586745689655%	0.736485	1	MS.gene028321;MS.gene36470	K08912+K08912	https:\\www.genome.jp\dbget-bin\www_bget?map00196
Folate biosynthesis	ko00790	5 out of 1658 0.301568154402895%	230 out of 59392 0.387257543103448%	0.77181	1	MS.gene011174;MS.gene37005;MS.gene002218;MS.gene02178;MS.gene32953	K01495+K01495+K14652+K14652+K20457	https:\\www.genome.jp\dbget-bin\www_bget?map00790
Ubiquitin mediated proteolysis	ko04120	51 out of 1658 3.07599517490953%	2009 out of 59392 3.38261045258621%	0.776726	1	MS.gene050252;MS.gene001381;MS.gene27879;MS.gene004599;MS.gene26890;MS.gene034212;MS.gene069906;MS.gene36390;MS.gene031012;MS.gene02631;MS.gene013591;MS.gene013617;MS.gene005985;MS.gene93021;MS.gene98045;MS.gene050623;MS.gene84094;MS.gene040727;MS.gene073704;MS.gene30916;MS.gene32005;MS.gene023025;MS.gene007740;MS.gene021602;MS.gene021604;MS.gene049765;MS.gene072976;MS.gene008306;MS.gene027623;MS…	K02927+K02977+K02977+K03347+K03355+K03358+K03363+K03363+K03869+K03875+K04506+K04506+K06688+K06689+K06689+K06689+K08770+K08770+K08770+K08770+K08770+K09561+K10144+K10144+K10144+K10144+K10144+K10260+K10260+K10260+K10260+K10260+K10260+K10260+K10260+K10260+K10260+K10260+K10260+K10260+K10260+K10570+K10571+K10573+K10576+K10581+K10581+K10610+K10615+K10684+K10686	https:\\www.genome.jp\dbget-bin\www_bget?map04120
Valine, leucine and isoleucine biosynthesis	ko00290	2 out of 1658 0.120627261761158%	106 out of 59392 0.178475215517241%	0.799165	1	MS.gene32842;MS.gene37450	K00826+K00826	https:\\www.genome.jp\dbget-bin\www_bget?map00290
Benzoxazinoid biosynthesis	ko00402	3 out of 1658 0.180940892641737%	161 out of 59392 0.271080280172414%	0.830147	1	MS.gene92118;MS.gene022679;MS.gene026541	K13229+K13229+K13229	https:\\www.genome.jp\dbget-bin\www_bget?map00402
One carbon pool by folate	ko00670	3 out of 1658 0.180940892641737%	162 out of 59392 0.27276400862069%	0.833254	1	MS.gene88638;MS.gene33307;MS.gene045357	K00297+K00297+K00600	https:\\www.genome.jp\dbget-bin\www_bget?map00670
Biotin metabolism	ko00780	3 out of 1658 0.180940892641737%	166 out of 59392 0.279498922413793%	0.8452	1	MS.gene051345;MS.gene70381;MS.gene028308	K02372+K02372+K09458	https:\\www.genome.jp\dbget-bin\www_bget?map00780
mRNA surveillance pathway	ko03015	19 out of 1658 1.145958986731%	841 out of 59392 1.416015625%	0.854206	1	MS.gene040156;MS.gene74919;MS.gene61689;MS.gene048752;MS.gene04963;MS.gene044062;MS.gene039113;MS.gene001171;MS.gene001172;MS.gene004707;MS.gene025171;MS.gene41637;MS.gene76165;MS.gene047327;MS.gene020906;MS.gene51445;MS.gene56778;MS.gene023307;MS.gene79079	K03267+K06269+K12812+K12881+K12881+K13126+K14325+K14376+K14376+K14396+K14397+K14399+K14400+K14409+K14411+K14411+K14411+K15544+K18723	https:\\www.genome.jp\dbget-bin\www_bget?map03015
Nicotinate and nicotinamide metabolism	ko00760	4 out of 1658 0.241254523522316%	218 out of 59392 0.367052801724138%	0.860475	1	MS.gene066790;MS.gene031787;MS.gene66300;MS.gene21117	K00763+K00858+K01513+K18551	https:\\www.genome.jp\dbget-bin\www_bget?map00760
Phenylalanine metabolism	ko00360	13 out of 1658 0.784077201447527%	606 out of 59392 1.02033943965517%	0.86562	1	MS.gene035229;MS.gene036587;MS.gene041465;MS.gene46369;MS.gene017072;MS.gene038288;MS.gene057099;MS.gene48040;MS.gene032280;MS.gene96845;MS.gene80556;MS.gene22422;MS.gene75310	K00276+K00276+K00276+K00276+K00457+K00457+K00457+K00457+K00815+K01593+K01593+K10775+K14454	https:\\www.genome.jp\dbget-bin\www_bget?map00360
Pantothenate and CoA biosynthesis	ko00770	7 out of 1658 0.422195416164053%	357 out of 59392 0.601091056034483%	0.872029	1	MS.gene026652;MS.gene045063;MS.gene038600;MS.gene32842;MS.gene37450;MS.gene66300;novel.14966	K00128+K00128+K00606+K00826+K00826+K01513+K17839	https:\\www.genome.jp\dbget-bin\www_bget?map00770
Sulfur relay system	ko04122	1 out of 1658 0.060313630880579%	73 out of 59392 0.122912176724138%	0.873579	1	MS.gene21444	K04487	https:\\www.genome.jp\dbget-bin\www_bget?map04122
Ether lipid metabolism	ko00565	4 out of 1658 0.241254523522316%	235 out of 59392 0.395676185344828%	0.896025	1	MS.gene053932;MS.gene43935;MS.gene62805;MS.gene07270	K00993+K00993+K13519+K14674	https:\\www.genome.jp\dbget-bin\www_bget?map00565
Thiamine metabolism	ko00730	2 out of 1658 0.120627261761158%	141 out of 59392 0.237405711206897%	0.907057	1	MS.gene07103;MS.gene21444	K00949+K04487	https:\\www.genome.jp\dbget-bin\www_bget?map00730
RNA polymerase	ko03020	15 out of 1658 0.904704463208685%	759 out of 59392 1.27794989224138%	0.937436	1	MS.gene034079;MS.gene59663;novel.7755;novel.9919;novel.9982;novel.11507;novel.13276;novel.13821;novel.14148;novel.14232;novel.15069;novel.16007;novel.19225;novel.6069;MS.gene00182	K03006+K03006+K03006+K03006+K03006+K03006+K03006+K03006+K03006+K03006+K03006+K03006+K03006+K03006+K03017	https:\\www.genome.jp\dbget-bin\www_bget?map03020
RNA transport	ko03013	40 out of 1658 2.41254523522316%	1784 out of 59392 3.00377155172414%	0.937545	1	MS.gene072267;MS.gene91203;MS.gene22649;MS.gene031371;MS.gene031372;MS.gene059889;MS.gene071215;MS.gene071218;MS.gene36780;MS.gene36960;MS.gene009658;MS.gene048784;MS.gene55753;MS.gene72166;MS.gene75349;MS.gene023651;MS.gene07826;novel.13358;MS.gene037824;MS.gene055399;MS.gene017034;MS.gene061557;MS.gene012247;MS.gene57601;MS.gene61689;MS.gene048752;MS.gene04963;MS.gene044062;MS.gene058115;MS.gen…	K00784+K03113+K03113+K03231+K03231+K03231+K03231+K03231+K03231+K03231+K03238+K03239+K03239+K03239+K03239+K03251+K03257+K03257+K03260+K03260+K07562+K07562+K07936+K07936+K12812+K12881+K12881+K13126+K14290+K14297+K14297+K14297+K14298+K14303+K14308+K14325+K14525+K14525+K14525+K18723	https:\\www.genome.jp\dbget-bin\www_bget?map03013
Plant-pathogen interaction	ko04626	148 out of 1658 8.92641737032569%	5965 out of 59392 10.0434401939655%	0.944394	1	MS.gene28634;MS.gene74407;novel.11941;MS.gene020834;MS.gene029661;MS.gene037253;MS.gene040499;MS.gene30654;MS.gene38261;MS.gene52563;novel.7075;novel.19463;MS.gene033423;MS.gene046732;MS.gene054033;MS.gene054049;MS.gene32397;MS.gene40444;MS.gene020886;MS.gene64024;MS.gene013470;MS.gene046960;MS.gene065509;MS.gene33954;MS.gene94172;MS.gene007847;MS.gene019292;MS.gene023625;MS.gene026903;MS.gene032…	K02183+K02183+K02358+K04079+K04079+K04079+K04079+K04079+K04079+K04079+K04079+K04079+K05391+K05391+K05391+K05391+K05391+K05391+K09487+K09487+K13412+K13412+K13412+K13412+K13416+K13416+K13416+K13416+K13416+K13416+K13416+K13416+K13416+K13416+K13416+K13416+K13416+K13416+K13417+K13417+K13417+K13417+K13420+K13420+K13420+K13420+K13420+K13420+K13420+K13420+K13420+K13420+K13424+K13424+K13424+K13424+K13424+…	https:\\www.genome.jp\dbget-bin\www_bget?map04626
Isoquinoline alkaloid biosynthesis	ko00950	11 out of 1658 0.663449939686369%	597 out of 59392 1.00518588362069%	0.945961	1	MS.gene035229;MS.gene036587;MS.gene041465;MS.gene46369;MS.gene032280;MS.gene96845;MS.gene80556;MS.gene066940;MS.gene75310;MS.gene68180;MS.gene68181	K00276+K00276+K00276+K00276+K00815+K01593+K01593+K01742+K14454+K14975+K14975	https:\\www.genome.jp\dbget-bin\www_bget?map00950
Ribosome biogenesis in eukaryotes	ko03008	21 out of 1658 1.26658624849216%	1028 out of 59392 1.73087284482759%	0.946967	1	MS.gene025560;MS.gene73995;MS.gene61253;MS.gene017034;MS.gene061557;MS.gene012247;MS.gene57601;MS.gene057730;MS.gene006227;MS.gene61498;MS.gene058115;MS.gene70303;MS.gene013362;novel.7966;novel.6248;MS.gene038501;MS.gene44154;MS.gene48368;novel.181;MS.gene029242;MS.gene76903	K03097+K03097+K03115+K07562+K07562+K07936+K07936+K11131+K11883+K12845+K14290+K14521+K14525+K14525+K14525+K14544+K14558+K14559+K14561+K14563+K14574	https:\\www.genome.jp\dbget-bin\www_bget?map03008
Pentose and glucuronate interconversions	ko00040	34 out of 1658 2.05066344993969%	1650 out of 59392 2.77815193965517%	0.975739	1	MS.gene015472;MS.gene025774;MS.gene025775;MS.gene037761;MS.gene09931;MS.gene22556;MS.gene81782;MS.gene30820;MS.gene014579;MS.gene001323;MS.gene010989;MS.gene011497;MS.gene015830;MS.gene045669;MS.gene05942;MS.gene25038;MS.gene45853;MS.gene48246;MS.gene59765;MS.gene71906;MS.gene78072;MS.gene006239;novel.18134;MS.gene91909;MS.gene20889;novel.10544;MS.gene76257;novel.12902;MS.gene71518;MS.gene012427;…	K00002+K00002+K00002+K00002+K00002+K00002+K00002+K00008+K00854+K01051+K01051+K01051+K01051+K01051+K01051+K01051+K01051+K01051+K01051+K01051+K01051+K01184+K01184+K01213+K01213+K01213+K01728+K01728+K01783+K01805+K01805+K01805+K12447+K12447	https:\\www.genome.jp\dbget-bin\www_bget?map00040
Autophagy - other	ko04136	5 out of 1658 0.301568154402895%	376 out of 59392 0.633081896551724%	0.980389	1	MS.gene027593;MS.gene44366;MS.gene046926;MS.gene01598;MS.gene02386	K00914+K00914+K07203+K08266+K08341	https:\\www.genome.jp\dbget-bin\www_bget?map04136
Glycosphingolipid biosynthesis - ganglio series	ko00604	3 out of 1658 0.180940892641737%	275 out of 59392 0.463025323275862%	0.983567	1	MS.gene011186;MS.gene012072;MS.gene026070	K12309+K12309+K12309	https:\\www.genome.jp\dbget-bin\www_bget?map00604
Amino sugar and nucleotide sugar metabolism	ko00520	32 out of 1658 1.93003618817853%	1616 out of 59392 2.72090517241379%	0.985147	1	MS.gene013866;MS.gene75382;novel.7845;novel.14633;novel.16482;MS.gene36627;MS.gene85276;MS.gene05394;MS.gene30801;MS.gene39893;MS.gene013924;MS.gene000930;MS.gene000931;MS.gene21669;MS.gene010114;MS.gene76011;MS.gene38294;novel.15683;novel.15686;MS.gene07657;MS.gene09372;MS.gene96031;MS.gene62816;MS.gene37195;MS.gene005527;novel.6929;MS.gene014187;MS.gene017563;MS.gene021710;MS.gene043229;MS.gene…	K00326+K00326+K00820+K00820+K00820+K00844+K00847+K00847+K00847+K00847+K01209+K01784+K01784+K01784+K01810+K01835+K08678+K12447+K12447+K12449+K12449+K12450+K12451+K13379+K15920+K15920+K20547+K20547+K20547+K20547+K20547+K20547	https:\\www.genome.jp\dbget-bin\www_bget?map00520
Cutin, suberine and wax biosynthesis	ko00073	5 out of 1658 0.301568154402895%	400 out of 59392 0.673491379310345%	0.987619	1	MS.gene66786;MS.gene23514;MS.gene94332;MS.gene51133;MS.gene71446	K13356+K13407+K15405+K20495+K20769	https:\\www.genome.jp\dbget-bin\www_bget?map00073
Glycosaminoglycan degradation	ko00531	4 out of 1658 0.241254523522316%	348 out of 59392 0.5859375%	0.988303	1	MS.gene004564;MS.gene011186;MS.gene012072;MS.gene026070	K10532+K12309+K12309+K12309	https:\\www.genome.jp\dbget-bin\www_bget?map00531
Other glycan degradation	ko00511	8 out of 1658 0.482509047044632%	566 out of 59392 0.952990301724138%	0.989812	1	MS.gene005199;MS.gene041266;MS.gene058274;MS.gene44065;MS.gene63010;MS.gene011186;MS.gene012072;MS.gene026070	K01206+K01206+K01206+K01206+K01206+K12309+K12309+K12309	https:\\www.genome.jp\dbget-bin\www_bget?map00511
Proteasome	ko03050	7 out of 1658 0.422195416164053%	516 out of 59392 0.868803879310345%	0.989945	1	MS.gene76014;MS.gene068080;MS.gene074412;MS.gene97690;MS.gene70383;MS.gene048987;MS.gene65590	K02729+K02735+K03029+K03062+K03066+K06691+K06699	https:\\www.genome.jp\dbget-bin\www_bget?map03050
Base excision repair	ko03410	4 out of 1658 0.241254523522316%	398 out of 59392 0.670123922413793%	0.995943	1	MS.gene52249;MS.gene67037;MS.gene20956;novel.11092	K02335+K02335+K04799+K10773	https:\\www.genome.jp\dbget-bin\www_bget?map03410
Glycerophospholipid metabolism	ko00564	13 out of 1658 0.784077201447527%	879 out of 59392 1.47999730603448%	0.996515	1	MS.gene00623;MS.gene45329;MS.gene053932;MS.gene43935;MS.gene62805;MS.gene07270;MS.gene04832;MS.gene21535;MS.gene46313;MS.gene47545;MS.gene024240;MS.gene01110;MS.gene59205	K00655+K00901+K00993+K00993+K13519+K14674+K16818+K16818+K16818+K16818+K18696+K25193+K25193	https:\\www.genome.jp\dbget-bin\www_bget?map00564
Diterpenoid biosynthesis	ko00904	2 out of 1658 0.120627261761158%	287 out of 59392 0.483230064655172%	0.997308	1	novel.18192;MS.gene022846	K04125+K17961	https:\\www.genome.jp\dbget-bin\www_bget?map00904
Betalain biosynthesis	ko00965	4 out of 1658 0.241254523522316%	418 out of 59392 0.70379849137931%	0.997375	1	MS.gene96845;MS.gene80556;MS.gene88816;MS.gene004927	K01593+K01593+K15777+K15777	https:\\www.genome.jp\dbget-bin\www_bget?map00965
Sphingolipid metabolism	ko00600	10 out of 1658 0.60313630880579%	780 out of 59392 1.31330818965517%	0.998534	1	MS.gene56130;MS.gene004947;MS.gene06516;MS.gene07479;MS.gene57350;MS.gene011186;MS.gene012072;MS.gene026070;MS.gene020909;MS.gene030455	K01634+K07407+K07407+K07407+K07407+K12309+K12309+K12309+K12349+K12349	https:\\www.genome.jp\dbget-bin\www_bget?map00600
Basal transcription factors	ko03022	4 out of 1658 0.241254523522316%	461 out of 59392 0.776198814655172%	0.99899	1	MS.gene028771;MS.gene99458;MS.gene21352;MS.gene82911	K03129+K03131+K03141+K10842	https:\\www.genome.jp\dbget-bin\www_bget?map03022
RNA degradation	ko03018	16 out of 1658 0.965018094089264%	1107 out of 59392 1.86388739224138%	0.999021	1	MS.gene99339;MS.gene40688;novel.11222;MS.gene024326;MS.gene029955;MS.gene046858;MS.gene99096;MS.gene21357;MS.gene24508;MS.gene26221;MS.gene72156;MS.gene20991;MS.gene23961;novel.3664;MS.gene006857;MS.gene044062	K00850+K00850+K00962+K01689+K01689+K01689+K04077+K04077+K04077+K04077+K12581+K12608+K12608+K12608+K12622+K13126	https:\\www.genome.jp\dbget-bin\www_bget?map03018
Fatty acid elongation	ko00062	1 out of 1658 0.060313630880579%	248 out of 59392 0.417564655172414%	0.999121	1	MS.gene03810	K15397	https:\\www.genome.jp\dbget-bin\www_bget?map00062
Aminoacyl-tRNA biosynthesis	ko00970	8 out of 1658 0.482509047044632%	742 out of 59392 1.24932650862069%	0.999605	1	MS.gene56711;MS.gene031797;MS.gene33677;MS.gene072641;MS.gene34266;MS.gene23260;MS.gene08294;novel.4208	K01866+K01870+K01870+K01881+K01881+K01889+K01890+K02433	https:\\www.genome.jp\dbget-bin\www_bget?map00970
Indole alkaloid biosynthesis	ko00901	3 out of 1658 0.180940892641737%	439 out of 59392 0.739156788793103%	0.999641	1	MS.gene96845;MS.gene80556;MS.gene014030	K01593+K01593+K01757	https:\\www.genome.jp\dbget-bin\www_bget?map00901
Oxidative phosphorylation	ko00190	10 out of 1658 0.60313630880579%	906 out of 59392 1.52545797413793%	0.999856	1	MS.gene73382;MS.gene47123;MS.gene058975;MS.gene048550;MS.gene029270;MS.gene031438;MS.gene32821;MS.gene020200;MS.gene000473;MS.gene53601	K00411+K00413+K01507+K02133+K02147+K02260+K03940+K03941+K03945+K11353	https:\\www.genome.jp\dbget-bin\www_bget?map00190
Spliceosome	ko03040	65 out of 1658 3.92038600723764%	3516 out of 59392 5.91998922413793%	0.999913	1	MS.gene99106;MS.gene004054;MS.gene021101;MS.gene032563;MS.gene035612;MS.gene046736;MS.gene054073;MS.gene055753;MS.gene061881;MS.gene061885;MS.gene066121;MS.gene74077;novel.10030;novel.11440;MS.gene39997;novel.17802;MS.gene068867;MS.gene062632;MS.gene006857;MS.gene007179;MS.gene93501;MS.gene044333;MS.gene44618;MS.gene47536;MS.gene006581;MS.gene61689;MS.gene83754;MS.gene016425;MS.gene063903;MS.gene…	K03283+K03283+K03283+K03283+K03283+K03283+K03283+K03283+K03283+K03283+K03283+K03283+K03283+K03283+K11087+K11094+K11098+K11099+K12622+K12733+K12741+K12741+K12741+K12741+K12811+K12812+K12818+K12818+K12818+K12818+K12818+K12818+K12818+K12818+K12818+K12818+K12825+K12829+K12835+K12835+K12836+K12837+K12845+K12856+K12857+K12862+K12873+K12881+K12881+K12890+K12890+K12890+K12890+K12890+K12891+K12891+K12891+…	https:\\www.genome.jp\dbget-bin\www_bget?map03040
Endocytosis	ko04144	43 out of 1658 2.5934861278649%	2641 out of 59392 4.44672683189655%	0.999975	1	MS.gene036000;MS.gene99106;MS.gene004054;MS.gene021101;MS.gene032563;MS.gene035612;MS.gene046736;MS.gene054073;MS.gene055753;MS.gene061881;MS.gene061885;MS.gene066121;MS.gene74077;novel.10030;novel.11440;MS.gene90570;MS.gene045809;MS.gene065574;MS.gene017310;MS.gene33386;MS.gene41120;MS.gene80269;MS.gene44370;MS.gene20375;MS.gene09656;MS.gene47927;MS.gene53495;MS.gene049786;MS.gene41173;MS.gene99…	K00889+K03283+K03283+K03283+K03283+K03283+K03283+K03283+K03283+K03283+K03283+K03283+K03283+K03283+K03283+K05758+K05758+K05758+K07889+K07897+K07904+K07904+K07937+K10396+K11826+K12191+K12191+K12193+K12471+K12472+K12472+K12472+K12486+K12492+K12493+K17917+K18443+K18584+K19366+K19366+K19476+K19476+K19476	https:\\www.genome.jp\dbget-bin\www_bget?map04144
DNA replication	ko03030	17 out of 1658 1.02533172496984%	1459 out of 59392 2.45655980603448%	0.999994	1	MS.gene58754;MS.gene75579;MS.gene52249;MS.gene67037;MS.gene061260;MS.gene014558;MS.gene018660;MS.gene031976;MS.gene20956;MS.gene84196;MS.gene005302;MS.gene013062;MS.gene01466;MS.gene26657;MS.gene49649;novel.9379;novel.9936	K02209+K02321+K02335+K02335+K02540+K02542+K02684+K02684+K04799+K07466+K07466+K07466+K07466+K07466+K07466+K07466+K07466	https:\\www.genome.jp\dbget-bin\www_bget?map03030
Nucleotide excision repair	ko03420	17 out of 1658 1.02533172496984%	1589 out of 59392 2.67544450431034%	0.999999	1	MS.gene52249;MS.gene67037;MS.gene21352;MS.gene004699;MS.gene84196;MS.gene005302;MS.gene013062;MS.gene01466;MS.gene26657;MS.gene49649;novel.9379;novel.9936;MS.gene52355;MS.gene27971;MS.gene78528;MS.gene83520;MS.gene82911	K02335+K02335+K03141+K03657+K07466+K07466+K07466+K07466+K07466+K07466+K07466+K07466+K10570+K10610+K10838+K10839+K10842	https:\\www.genome.jp\dbget-bin\www_bget?map03420
Mismatch repair	ko03430	10 out of 1658 0.60313630880579%	1427 out of 59392 2.40268049568966%	1	1	MS.gene004699;MS.gene98076;MS.gene84196;MS.gene005302;MS.gene013062;MS.gene01466;MS.gene26657;MS.gene49649;novel.9379;novel.9936	K03657+K07456+K07466+K07466+K07466+K07466+K07466+K07466+K07466+K07466	https:\\www.genome.jp\dbget-bin\www_bget?map03430
Homologous recombination	ko03440	16 out of 1658 0.965018094089264%	1892 out of 59392 3.18561422413793%	1	1	MS.gene52249;MS.gene67037;MS.gene033745;MS.gene84196;MS.gene005302;MS.gene013062;MS.gene01466;MS.gene26657;MS.gene49649;novel.9379;novel.9936;MS.gene96322;MS.gene014950;MS.gene54691;MS.gene034987;MS.gene72186	K02335+K02335+K03655+K07466+K07466+K07466+K07466+K07466+K07466+K07466+K07466+K08991+K10728+K10865+K12173+K12173	https:\\www.genome.jp\dbget-bin\www_bget?map03440

## Sheet: S vs JS
#KEGG_pathway	ko_id	Cluster_frequency	Genome_frequency	P-value	Corrected_P-value	GeneID	KEGG Orthology	hyperlink
Glutathione metabolism	ko00480	13 out of 240 5.41666666666667%	785 out of 59392 1.32172683189655%	2.22266e-05	0.00220043	MS.gene89245;MS.gene89256;MS.gene94273;MS.gene029888;MS.gene039179;MS.gene055138;MS.gene062846;MS.gene063434;MS.gene07174;MS.gene21351;MS.gene46044;MS.gene46049;MS.gene75177	K00799+K00799+K00799+K00799+K00799+K00799+K00799+K00799+K00799+K00799+K00799+K00799+K21888	https:\\www.genome.jp\dbget-bin\www_bget?map00480
Isoflavonoid biosynthesis	ko00943	11 out of 240 4.58333333333333%	617 out of 59392 1.03886045258621%	4.95651e-05	0.00490695	MS.gene59396;MS.gene88267;MS.gene011756;novel.11552;MS.gene91601;MS.gene91605;MS.gene44638;novel.12648;MS.gene48582;MS.gene018025;MS.gene52700	K05281+K13259+K13260+K13260+K13262+K13262+K13262+K13263+K13264+K25075+K25075	https:\\www.genome.jp\dbget-bin\www_bget?map00943
Biosynthesis of secondary metabolites	ko01110	79 out of 240 32.9166666666667%	13283 out of 59392 22.3649649784483%	0.00011018	0.0109078	MS.gene015472;MS.gene015473;MS.gene037749;MS.gene22555;MS.gene22556;novel.9634;MS.gene92996;MS.gene97086;MS.gene86209;MS.gene040293;MS.gene02080;MS.gene047665;MS.gene23026;MS.gene72641;MS.gene017642;MS.gene005140;MS.gene66256;MS.gene94703;MS.gene50335;novel.14280;MS.gene62286;MS.gene28853;novel.12594;MS.gene046483;MS.gene039663;MS.gene68297;MS.gene35609;MS.gene22826;MS.gene038036;MS.gene032515;MS…	K00002+K00002+K00002+K00002+K00002+K00002+K00058+K00224+K00276+K00382+K00430+K00430+K00430+K00430+K00475+K00600+K00640+K00695+K00695+K00695+K00703+K00789+K00815+K00901+K00930+K00993+K01087+K01092+K01177+K01188+K01188+K01188+K01742+K01859+K05278+K05281+K05359+K05894+K05894+K05894+K05894+K05894+K08730+K09838+K09841+K11820+K11820+K11820+K11820+K12447+K12447+K12657+K13033+K13065+K13066+K13259+K13260+…	https:\\www.genome.jp\dbget-bin\www_bget?map01110
Monoterpenoid biosynthesis	ko00902	7 out of 240 2.91666666666667%	311 out of 59392 0.523639547413793%	0.000297518	0.0294543	MS.gene23068;MS.gene027818;MS.gene068613;MS.gene069146;MS.gene069151;MS.gene070871;MS.gene070872	K15095+K23232+K23232+K23232+K23232+K23232+K23232	https:\\www.genome.jp\dbget-bin\www_bget?map00902
Ascorbate and aldarate metabolism	ko00053	10 out of 240 4.16666666666667%	730 out of 59392 1.22912176724138%	0.000858183	0.0849601	MS.gene015472;MS.gene015473;MS.gene037749;MS.gene22555;MS.gene22556;novel.9634;MS.gene83761;novel.10245;novel.15221;MS.gene75177	K00002+K00002+K00002+K00002+K00002+K00002+K00423+K12447+K12447+K21888	https:\\www.genome.jp\dbget-bin\www_bget?map00053
Metabolic pathways	ko01100	119 out of 240 49.5833333333333%	23505 out of 59392 39.5760371767241%	0.00103118	0.102087	MS.gene015472;MS.gene015473;MS.gene037749;MS.gene22555;MS.gene22556;novel.9634;MS.gene014608;MS.gene72021;MS.gene92996;MS.gene016051;MS.gene33139;MS.gene053596;MS.gene86209;MS.gene040293;MS.gene031780;MS.gene73382;MS.gene83761;MS.gene02080;MS.gene047665;MS.gene23026;MS.gene72641;MS.gene017642;novel.18409;MS.gene005140;MS.gene66256;MS.gene94703;MS.gene50335;novel.14280;MS.gene62286;MS.gene28853;MS…	K00002+K00002+K00002+K00002+K00002+K00002+K00029+K00029+K00058+K00131+K00131+K00140+K00276+K00382+K00392+K00411+K00423+K00430+K00430+K00430+K00430+K00475+K00558+K00600+K00640+K00695+K00695+K00695+K00703+K00789+K00799+K00799+K00799+K00799+K00799+K00799+K00799+K00799+K00799+K00799+K00799+K00799+K00815+K00901+K00915+K00930+K00993+K01051+K01087+K01092+K01177+K01188+K01188+K01188+K01230+K01466+K01495+…	https:\\www.genome.jp\dbget-bin\www_bget?map01100
Glucosinolate biosynthesis	ko00966	4 out of 240 1.66666666666667%	132 out of 59392 0.222252155172414%	0.00209707	0.20761	MS.gene027549;MS.gene43930;MS.gene43932;MS.gene68301	K11820+K11820+K11820+K11820	https:\\www.genome.jp\dbget-bin\www_bget?map00966
alpha-Linolenic acid metabolism	ko00592	7 out of 240 2.91666666666667%	467 out of 59392 0.786301185344828%	0.00309418	0.306323	MS.gene97086;MS.gene001051;MS.gene024838;MS.gene21810;MS.gene21813;MS.gene40474;MS.gene20637	K00224+K05894+K05894+K05894+K05894+K05894+K10529	https:\\www.genome.jp\dbget-bin\www_bget?map00592
Pyruvate metabolism	ko00620	9 out of 240 3.75%	760 out of 59392 1.27963362068966%	0.00404541	0.400495	MS.gene015472;MS.gene015473;MS.gene037749;MS.gene22555;MS.gene22556;novel.9634;MS.gene014608;MS.gene72021;MS.gene040293	K00002+K00002+K00002+K00002+K00002+K00002+K00029+K00029+K00382	https:\\www.genome.jp\dbget-bin\www_bget?map00620
Biosynthesis of cofactors	ko01240	14 out of 240 5.83333333333333%	1918 out of 59392 3.2293911637931%	0.0249683	1	MS.gene015472;MS.gene015473;MS.gene037749;MS.gene22555;MS.gene22556;novel.9634;MS.gene040293;MS.gene005140;MS.gene28853;MS.gene011174;MS.gene072120;MS.gene067085;MS.gene20199;MS.gene071898	K00002+K00002+K00002+K00002+K00002+K00002+K00382+K00600+K00789+K01495+K01495+K03517+K11153+K14652	https:\\www.genome.jp\dbget-bin\www_bget?map01240
2-Oxocarboxylic acid metabolism	ko01210	5 out of 240 2.08333333333333%	437 out of 59392 0.735789331896552%	0.0331105	1	MS.gene039663;MS.gene027549;MS.gene43930;MS.gene43932;MS.gene68301	K00930+K11820+K11820+K11820+K11820	https:\\www.genome.jp\dbget-bin\www_bget?map01210
Glycolysis / Gluconeogenesis	ko00010	9 out of 240 3.75%	1104 out of 59392 1.85883620689655%	0.0366884	1	MS.gene015472;MS.gene015473;MS.gene037749;MS.gene22555;MS.gene22556;novel.9634;MS.gene016051;MS.gene33139;MS.gene040293	K00002+K00002+K00002+K00002+K00002+K00002+K00131+K00131+K00382	https:\\www.genome.jp\dbget-bin\www_bget?map00010
Nitrogen metabolism	ko00910	3 out of 240 1.25%	214 out of 59392 0.360317887931034%	0.0564955	1	MS.gene029721;MS.gene29051;MS.gene29106	K01915+K10534+K10534	https:\\www.genome.jp\dbget-bin\www_bget?map00910
Glycerolipid metabolism	ko00561	7 out of 240 2.91666666666667%	846 out of 59392 1.42443426724138%	0.0574772	1	MS.gene015472;MS.gene015473;MS.gene037749;MS.gene22555;MS.gene22556;novel.9634;MS.gene046483	K00002+K00002+K00002+K00002+K00002+K00002+K00901	https:\\www.genome.jp\dbget-bin\www_bget?map00561
Folate biosynthesis	ko00790	3 out of 240 1.25%	230 out of 59392 0.387257543103448%	0.0670622	1	MS.gene011174;MS.gene072120;MS.gene071898	K01495+K01495+K14652	https:\\www.genome.jp\dbget-bin\www_bget?map00790
Autophagy - other	ko04136	4 out of 240 1.66666666666667%	376 out of 59392 0.633081896551724%	0.0671146	1	MS.gene83722;MS.gene059318;MS.gene043770;MS.gene81541	K08341+K08341+K17907+K17907	https:\\www.genome.jp\dbget-bin\www_bget?map04136
MAPK signaling pathway - plant	ko04016	18 out of 240 7.5%	3102 out of 59392 5.22292564655172%	0.0797646	1	MS.gene063415;novel.16844;MS.gene07728;MS.gene049457;MS.gene059916;MS.gene38536;MS.gene008006;MS.gene036090;MS.gene49293;MS.gene50632;MS.gene79275;MS.gene017563;MS.gene021709;MS.gene23769;MS.gene035436;MS.gene28678;MS.gene21608;MS.gene36734	K13416+K13416+K13422+K13424+K13424+K13424+K14496+K14516+K14516+K14516+K14516+K20547+K20547+K20547+K20606+K20606+K20718+K20728	https:\\www.genome.jp\dbget-bin\www_bget?map04016
Linoleic acid metabolism	ko00591	3 out of 240 1.25%	248 out of 59392 0.417564655172414%	0.0799389	1	MS.gene011244;MS.gene044274;MS.gene69751	K15718+K15718+K15718	https:\\www.genome.jp\dbget-bin\www_bget?map00591
Various types of N-glycan biosynthesis	ko00513	3 out of 240 1.25%	253 out of 59392 0.425983297413793%	0.0836932	1	MS.gene002661;MS.gene051061;MS.gene97740	K01230+K07441+K12668	https:\\www.genome.jp\dbget-bin\www_bget?map00513
Sesquiterpenoid and triterpenoid biosynthesis	ko00909	3 out of 240 1.25%	289 out of 59392 0.486597521551724%	0.112822	1	MS.gene029027;MS.gene041186;MS.gene74483	K14175+K15472+K15472	https:\\www.genome.jp\dbget-bin\www_bget?map00909
Tryptophan metabolism	ko00380	6 out of 240 2.5%	868 out of 59392 1.46147629310345%	0.141517	1	MS.gene040293;MS.gene027549;MS.gene43930;MS.gene43932;MS.gene68301;MS.gene054945	K00382+K11820+K11820+K11820+K11820+K13066	https:\\www.genome.jp\dbget-bin\www_bget?map00380
Glyoxylate and dicarboxylate metabolism	ko00630	5 out of 240 2.08333333333333%	682 out of 59392 1.14830280172414%	0.144035	1	MS.gene040293;MS.gene005140;MS.gene029721;MS.gene98170;MS.gene008970	K00382+K00600+K01915+K18121+K22133	https:\\www.genome.jp\dbget-bin\www_bget?map00630
N-Glycan biosynthesis	ko00510	3 out of 240 1.25%	366 out of 59392 0.616244612068966%	0.185227	1	MS.gene002661;MS.gene051061;MS.gene97740	K01230+K07441+K12668	https:\\www.genome.jp\dbget-bin\www_bget?map00510
Cyanoamino acid metabolism	ko00460	5 out of 240 2.08333333333333%	778 out of 59392 1.30994073275862%	0.208154	1	MS.gene005140;MS.gene032515;MS.gene041227;MS.gene28358;MS.gene39390	K00600+K01188+K01188+K01188+K13033	https:\\www.genome.jp\dbget-bin\www_bget?map00460
Nicotinate and nicotinamide metabolism	ko00760	2 out of 240 0.833333333333333%	218 out of 59392 0.367052801724138%	0.220374	1	MS.gene067085;MS.gene20930	K03517+K18551	https:\\www.genome.jp\dbget-bin\www_bget?map00760
Isoquinoline alkaloid biosynthesis	ko00950	4 out of 240 1.66666666666667%	597 out of 59392 1.00518588362069%	0.223002	1	MS.gene86209;novel.12594;MS.gene066940;MS.gene68181	K00276+K00815+K01742+K14975	https:\\www.genome.jp\dbget-bin\www_bget?map00950
Pentose and glucuronate interconversions	ko00040	9 out of 240 3.75%	1650 out of 59392 2.77815193965517%	0.226031	1	MS.gene015472;MS.gene015473;MS.gene037749;MS.gene22555;MS.gene22556;novel.9634;MS.gene013597;novel.10245;novel.15221	K00002+K00002+K00002+K00002+K00002+K00002+K01051+K12447+K12447	https:\\www.genome.jp\dbget-bin\www_bget?map00040
Propanoate metabolism	ko00640	2 out of 240 0.833333333333333%	225 out of 59392 0.378838900862069%	0.230756	1	MS.gene053596;MS.gene040293	K00140+K00382	https:\\www.genome.jp\dbget-bin\www_bget?map00640
Carbon metabolism	ko01200	10 out of 240 4.16666666666667%	1882 out of 59392 3.16877693965517%	0.232748	1	MS.gene014608;MS.gene72021;MS.gene92996;MS.gene016051;MS.gene33139;MS.gene053596;MS.gene040293;MS.gene005140;MS.gene66256;MS.gene98170	K00029+K00029+K00058+K00131+K00131+K00140+K00382+K00600+K00640+K18121	https:\\www.genome.jp\dbget-bin\www_bget?map01200
Tropane, piperidine and pyridine alkaloid biosynthesis	ko00960	2 out of 240 0.833333333333333%	230 out of 59392 0.387257543103448%	0.238191	1	MS.gene86209;novel.12594	K00276+K00815	https:\\www.genome.jp\dbget-bin\www_bget?map00960
Phenylpropanoid biosynthesis	ko00940	11 out of 240 4.58333333333333%	2126 out of 59392 3.57960668103448%	0.243522	1	MS.gene02080;MS.gene047665;MS.gene23026;MS.gene72641;MS.gene032515;MS.gene041227;MS.gene28358;novel.12458;MS.gene054945;MS.gene35105;MS.gene045762	K00430+K00430+K00430+K00430+K01188+K01188+K01188+K13065+K13066+K22395+K23260	https:\\www.genome.jp\dbget-bin\www_bget?map00940
Arginine biosynthesis	ko00220	2 out of 240 0.833333333333333%	241 out of 59392 0.405778556034483%	0.254586	1	MS.gene039663;MS.gene029721	K00930+K01915	https:\\www.genome.jp\dbget-bin\www_bget?map00220
Sulfur metabolism	ko00920	2 out of 240 0.833333333333333%	242 out of 59392 0.407462284482759%	0.256078	1	MS.gene031780;MS.gene66256	K00392+K00640	https:\\www.genome.jp\dbget-bin\www_bget?map00920
Flavone and flavonol biosynthesis	ko00944	2 out of 240 0.833333333333333%	250 out of 59392 0.420932112068966%	0.268018	1	MS.gene48582;MS.gene065241	K13264+K22794	https:\\www.genome.jp\dbget-bin\www_bget?map00944
Phosphatidylinositol signaling system	ko04070	4 out of 240 1.66666666666667%	661 out of 59392 1.11294450431034%	0.278979	1	MS.gene046483;MS.gene57548;MS.gene22826;MS.gene056833	K00901+K00915+K01092+K10572	https:\\www.genome.jp\dbget-bin\www_bget?map04070
Cysteine and methionine metabolism	ko00270	6 out of 240 2.5%	1098 out of 59392 1.8487338362069%	0.285238	1	MS.gene92996;novel.18409;MS.gene66256;MS.gene28853;novel.12594;MS.gene93734	K00058+K00558+K00640+K00789+K00815+K05396	https:\\www.genome.jp\dbget-bin\www_bget?map00270
Phosphonate and phosphinate metabolism	ko00440	1 out of 240 0.416666666666667%	85 out of 59392 0.143116918103448%	0.291369	1	MS.gene68297	K00993	https:\\www.genome.jp\dbget-bin\www_bget?map00440
Phenylalanine, tyrosine and tryptophan biosynthesis	ko00400	2 out of 240 0.833333333333333%	285 out of 59392 0.479862607758621%	0.32008	1	novel.12594;MS.gene35369	K00815+K05359	https:\\www.genome.jp\dbget-bin\www_bget?map00400
Protein processing in endoplasmic reticulum	ko04141	13 out of 240 5.41666666666667%	2763 out of 59392 4.65214170258621%	0.327046	1	MS.gene002661;MS.gene93623;MS.gene43135;MS.gene051217;MS.gene054073;MS.gene74143;MS.gene58617;MS.gene64861;MS.gene000405;MS.gene043575;MS.gene97740;MS.gene064475;MS.gene39773	K01230+K01456+K01456+K03283+K03283+K03283+K03347+K04523+K08054+K09481+K12668+K13525+K14026	https:\\www.genome.jp\dbget-bin\www_bget?map04141
Flavonoid biosynthesis	ko00941	4 out of 240 1.66666666666667%	720 out of 59392 1.21228448275862%	0.332324	1	MS.gene017642;MS.gene97341;MS.gene68774;novel.12458	K00475+K01859+K05278+K13065	https:\\www.genome.jp\dbget-bin\www_bget?map00941
Biosynthesis of amino acids	ko01230	8 out of 240 3.33333333333333%	1622 out of 59392 2.73100754310345%	0.334151	1	MS.gene92996;MS.gene005140;MS.gene66256;MS.gene28853;MS.gene039663;MS.gene029721;MS.gene35369;MS.gene037710	K00058+K00600+K00640+K00789+K00930+K01915+K05359+K12657	https:\\www.genome.jp\dbget-bin\www_bget?map01230
Inositol phosphate metabolism	ko00562	4 out of 240 1.66666666666667%	729 out of 59392 1.2274380387931%	0.34053	1	MS.gene053596;MS.gene57548;MS.gene22826;MS.gene056833	K00140+K00915+K01092+K10572	https:\\www.genome.jp\dbget-bin\www_bget?map00562
Glycine, serine and threonine metabolism	ko00260	4 out of 240 1.66666666666667%	731 out of 59392 1.23080549568966%	0.342354	1	MS.gene92996;MS.gene86209;MS.gene040293;MS.gene005140	K00058+K00276+K00382+K00600	https:\\www.genome.jp\dbget-bin\www_bget?map00260
Porphyrin and chlorophyll metabolism	ko00860	2 out of 240 0.833333333333333%	322 out of 59392 0.542160560344828%	0.374099	1	MS.gene06792;MS.gene44664	K13544+K13544	https:\\www.genome.jp\dbget-bin\www_bget?map00860
Endocytosis	ko04144	12 out of 240 5%	2641 out of 59392 4.44672683189655%	0.38065	1	novel.13594;MS.gene051217;MS.gene054073;MS.gene74143;MS.gene54183;MS.gene67605;MS.gene027639;MS.gene80269;MS.gene44377;MS.gene069907;MS.gene45691;MS.gene43178	K01528+K03283+K03283+K03283+K04646+K05758+K07904+K07904+K11866+K12197+K12472+K12489	https:\\www.genome.jp\dbget-bin\www_bget?map04144
Phagosome	ko04145	3 out of 240 1.25%	555 out of 59392 0.934469288793103%	0.389149	1	MS.gene030397;MS.gene000405;MS.gene043575	K07375+K08054+K09481	https:\\www.genome.jp\dbget-bin\www_bget?map04145
beta-Alanine metabolism	ko00410	2 out of 240 0.833333333333333%	349 out of 59392 0.587621228448276%	0.412413	1	MS.gene053596;MS.gene86209	K00140+K00276	https:\\www.genome.jp\dbget-bin\www_bget?map00410
Galactose metabolism	ko00052	5 out of 240 2.08333333333333%	1069 out of 59392 1.7999057112069%	0.434058	1	novel.10245;novel.15221;MS.gene055057;MS.gene21045;MS.gene21048	K12447+K12447+K18819+K18819+K18819	https:\\www.genome.jp\dbget-bin\www_bget?map00052
Protein export	ko03060	2 out of 240 0.833333333333333%	378 out of 59392 0.636449353448276%	0.452238	1	MS.gene24730;MS.gene043575	K03106+K09481	https:\\www.genome.jp\dbget-bin\www_bget?map03060
RNA degradation	ko03018	5 out of 240 2.08333333333333%	1107 out of 59392 1.86388739224138%	0.46385	1	MS.gene99096;MS.gene009616;MS.gene008743;novel.17580;novel.2883	K04077+K04077+K14442+K14442+K14442	https:\\www.genome.jp\dbget-bin\www_bget?map03018
Benzoxazinoid biosynthesis	ko00402	1 out of 240 0.416666666666667%	161 out of 59392 0.271080280172414%	0.47941	1	MS.gene78871	K13229	https:\\www.genome.jp\dbget-bin\www_bget?map00402
One carbon pool by folate	ko00670	1 out of 240 0.416666666666667%	162 out of 59392 0.27276400862069%	0.481519	1	MS.gene005140	K00600	https:\\www.genome.jp\dbget-bin\www_bget?map00670
Biotin metabolism	ko00780	1 out of 240 0.416666666666667%	166 out of 59392 0.279498922413793%	0.489872	1	MS.gene29060	K01942	https:\\www.genome.jp\dbget-bin\www_bget?map00780
Riboflavin metabolism	ko00740	1 out of 240 0.416666666666667%	167 out of 59392 0.281182650862069%	0.491939	1	MS.gene071898	K14652	https:\\www.genome.jp\dbget-bin\www_bget?map00740
Carotenoid biosynthesis	ko00906	2 out of 240 0.833333333333333%	411 out of 59392 0.692012392241379%	0.495635	1	MS.gene029284;MS.gene074091	K09838+K09841	https:\\www.genome.jp\dbget-bin\www_bget?map00906
Biosynthesis of unsaturated fatty acids	ko01040	1 out of 240 0.416666666666667%	172 out of 59392 0.289601293103448%	0.502151	1	MS.gene52655	K10256	https:\\www.genome.jp\dbget-bin\www_bget?map01040
Betalain biosynthesis	ko00965	2 out of 240 0.833333333333333%	418 out of 59392 0.70379849137931%	0.504559	1	MS.gene062214;MS.gene79601	K15777+K15777	https:\\www.genome.jp\dbget-bin\www_bget?map00965
Zeatin biosynthesis	ko00908	2 out of 240 0.833333333333333%	431 out of 59392 0.725686961206897%	0.520857	1	MS.gene020608;novel.16142	K13496+K13496	https:\\www.genome.jp\dbget-bin\www_bget?map00908
Butanoate metabolism	ko00650	1 out of 240 0.416666666666667%	186 out of 59392 0.31317349137931%	0.529668	1	MS.gene98170	K18121	https:\\www.genome.jp\dbget-bin\www_bget?map00650
Valine, leucine and isoleucine degradation	ko00280	2 out of 240 0.833333333333333%	464 out of 59392 0.78125%	0.560598	1	MS.gene053596;MS.gene040293	K00140+K00382	https:\\www.genome.jp\dbget-bin\www_bget?map00280
Ubiquitin mediated proteolysis	ko04120	8 out of 240 3.33333333333333%	2009 out of 59392 3.38261045258621%	0.56638	1	MS.gene58617;MS.gene069906;MS.gene73975;MS.gene049312;MS.gene48390;MS.gene56926;MS.gene60356;MS.gene005123	K03347+K03363+K04506+K10260+K10260+K10260+K10260+K10599	https:\\www.genome.jp\dbget-bin\www_bget?map04120
Carbon fixation in photosynthetic organisms	ko00710	2 out of 240 0.833333333333333%	487 out of 59392 0.819975754310345%	0.58688	1	MS.gene014608;MS.gene72021	K00029+K00029	https:\\www.genome.jp\dbget-bin\www_bget?map00710
Ether lipid metabolism	ko00565	1 out of 240 0.416666666666667%	235 out of 59392 0.395676185344828%	0.614583	1	MS.gene68297	K00993	https:\\www.genome.jp\dbget-bin\www_bget?map00565
Arachidonic acid metabolism	ko00590	1 out of 240 0.416666666666667%	248 out of 59392 0.417564655172414%	0.634425	1	MS.gene89620	K08726	https:\\www.genome.jp\dbget-bin\www_bget?map00590
Amino sugar and nucleotide sugar metabolism	ko00520	6 out of 240 2.5%	1616 out of 59392 2.72090517241379%	0.638826	1	novel.10245;novel.15221;MS.gene072706;MS.gene017563;MS.gene021709;MS.gene23769	K12447+K12447+K15920+K20547+K20547+K20547	https:\\www.genome.jp\dbget-bin\www_bget?map00520
Pentose phosphate pathway	ko00030	2 out of 240 0.833333333333333%	550 out of 59392 0.926050646551724%	0.652849	1	MS.gene016051;MS.gene33139	K00131+K00131	https:\\www.genome.jp\dbget-bin\www_bget?map00030
Ribosome	ko03010	7 out of 240 2.91666666666667%	1908 out of 59392 3.21255387931034%	0.654066	1	MS.gene20153;MS.gene88796;MS.gene007066;MS.gene60716;MS.gene35424;MS.gene071364;MS.gene071366	K02910+K02911+K02917+K02964+K02975+K02984+K02984	https:\\www.genome.jp\dbget-bin\www_bget?map03010
Glycerophospholipid metabolism	ko00564	3 out of 240 1.25%	879 out of 59392 1.47999730603448%	0.69132	1	MS.gene046483;MS.gene68297;MS.gene00258	K00901+K00993+K08730	https:\\www.genome.jp\dbget-bin\www_bget?map00564
Phenylalanine metabolism	ko00360	2 out of 240 0.833333333333333%	606 out of 59392 1.02033943965517%	0.704226	1	MS.gene86209;novel.12594	K00276+K00815	https:\\www.genome.jp\dbget-bin\www_bget?map00360
Citrate cycle (TCA cycle)	ko00020	1 out of 240 0.416666666666667%	301 out of 59392 0.506802262931034%	0.705326	1	MS.gene040293	K00382	https:\\www.genome.jp\dbget-bin\www_bget?map00020
Tyrosine metabolism	ko00350	2 out of 240 0.833333333333333%	629 out of 59392 1.05906519396552%	0.723428	1	MS.gene86209;novel.12594	K00276+K00815	https:\\www.genome.jp\dbget-bin\www_bget?map00350
RNA transport	ko03013	6 out of 240 2.5%	1784 out of 59392 3.00377155172414%	0.72977	1	MS.gene031372;MS.gene36780;MS.gene36960;MS.gene81036;novel.6669;MS.gene09041	K03231+K03231+K03231+K03239+K14288+K14308	https:\\www.genome.jp\dbget-bin\www_bget?map03013
Stilbenoid, diarylheptanoid and gingerol biosynthesis	ko00945	1 out of 240 0.416666666666667%	342 out of 59392 0.575835129310345%	0.750626	1	novel.12458	K13065	https:\\www.genome.jp\dbget-bin\www_bget?map00945
Starch and sucrose metabolism	ko00500	9 out of 240 3.75%	2667 out of 59392 4.49050377155172%	0.754169	1	MS.gene94703;MS.gene50335;novel.14280;MS.gene62286;MS.gene35609;MS.gene038036;MS.gene032515;MS.gene041227;MS.gene28358	K00695+K00695+K00695+K00703+K01087+K01177+K01188+K01188+K01188	https:\\www.genome.jp\dbget-bin\www_bget?map00500
Fatty acid degradation	ko00071	1 out of 240 0.416666666666667%	378 out of 59392 0.636449353448276%	0.784644	1	MS.gene29393	K07517	https:\\www.genome.jp\dbget-bin\www_bget?map00071
Peroxisome	ko04146	2 out of 240 0.833333333333333%	719 out of 59392 1.21060075431034%	0.788729	1	MS.gene013412;MS.gene89620	K04564+K08726	https:\\www.genome.jp\dbget-bin\www_bget?map04146
ABC transporters	ko02010	3 out of 240 1.25%	1054 out of 59392 1.77464978448276%	0.800636	1	MS.gene89082;MS.gene015954;MS.gene36266	K08711+K08711+K08711	https:\\www.genome.jp\dbget-bin\www_bget?map02010
Lysine degradation	ko00310	1 out of 240 0.416666666666667%	398 out of 59392 0.670123922413793%	0.801502	1	MS.gene040293	K00382	https:\\www.genome.jp\dbget-bin\www_bget?map00310
Terpenoid backbone biosynthesis	ko00900	1 out of 240 0.416666666666667%	405 out of 59392 0.681910021551724%	0.807087	1	MS.gene004535	K15889	https:\\www.genome.jp\dbget-bin\www_bget?map00900
Ubiquinone and other terpenoid-quinone biosynthesis	ko00130	1 out of 240 0.416666666666667%	406 out of 59392 0.68359375%	0.807872	1	novel.12594	K00815	https:\\www.genome.jp\dbget-bin\www_bget?map00130
Alanine, aspartate and glutamate metabolism	ko00250	1 out of 240 0.416666666666667%	430 out of 59392 0.724003232758621%	0.825784	1	MS.gene029721	K01915	https:\\www.genome.jp\dbget-bin\www_bget?map00250
Arginine and proline metabolism	ko00330	1 out of 240 0.416666666666667%	451 out of 59392 0.759361530172414%	0.840087	1	MS.gene037710	K12657	https:\\www.genome.jp\dbget-bin\www_bget?map00330
Basal transcription factors	ko03022	1 out of 240 0.416666666666667%	461 out of 59392 0.776198814655172%	0.846481	1	MS.gene82911	K10842	https:\\www.genome.jp\dbget-bin\www_bget?map03022
Proteasome	ko03050	1 out of 240 0.416666666666667%	516 out of 59392 0.868803879310345%	0.877358	1	MS.gene40879	K03065	https:\\www.genome.jp\dbget-bin\www_bget?map03050
Fatty acid metabolism	ko01212	1 out of 240 0.416666666666667%	537 out of 59392 0.904162176724138%	0.887441	1	MS.gene52655	K10256	https:\\www.genome.jp\dbget-bin\www_bget?map01212
Circadian rhythm - plant	ko04712	1 out of 240 0.416666666666667%	620 out of 59392 1.04391163793103%	0.919835	1	MS.gene55252	K16222	https:\\www.genome.jp\dbget-bin\www_bget?map04712
Spliceosome	ko03040	9 out of 240 3.75%	3516 out of 59392 5.91998922413793%	0.949445	1	MS.gene051217;MS.gene054073;MS.gene74143;MS.gene005123;MS.gene018076;MS.gene068867;MS.gene91489;MS.gene034876;MS.gene004548	K03283+K03283+K03283+K10599+K11087+K11098+K12836+K12856+K12862	https:\\www.genome.jp\dbget-bin\www_bget?map03040
Aminoacyl-tRNA biosynthesis	ko00970	1 out of 240 0.416666666666667%	742 out of 59392 1.24932650862069%	0.951364	1	MS.gene028001	K22503	https:\\www.genome.jp\dbget-bin\www_bget?map00970
Plant hormone signal transduction	ko04075	11 out of 240 4.58333333333333%	4173 out of 59392 7.02619881465517%	0.95381	1	MS.gene063415;novel.16844;MS.gene07728;MS.gene94560;MS.gene002723;MS.gene07404;MS.gene008006;MS.gene036090;MS.gene49293;MS.gene50632;MS.gene79275	K13416+K13416+K13422+K13464+K13464+K14484+K14496+K14516+K14516+K14516+K14516	https:\\www.genome.jp\dbget-bin\www_bget?map04075
RNA polymerase	ko03020	1 out of 240 0.416666666666667%	759 out of 59392 1.27794989224138%	0.95464	1	novel.16119	K03006	https:\\www.genome.jp\dbget-bin\www_bget?map03020
Nucleotide excision repair	ko03420	3 out of 240 1.25%	1589 out of 59392 2.67544450431034%	0.956659	1	MS.gene67604;novel.13796;MS.gene82911	K07466+K07466+K10842	https:\\www.genome.jp\dbget-bin\www_bget?map03420
mRNA surveillance pathway	ko03015	1 out of 240 0.416666666666667%	841 out of 59392 1.416015625%	0.967603	1	MS.gene36824	K04354	https:\\www.genome.jp\dbget-bin\www_bget?map03015
Purine metabolism	ko00230	1 out of 240 0.416666666666667%	841 out of 59392 1.416015625%	0.967603	1	MS.gene002414	K01466	https:\\www.genome.jp\dbget-bin\www_bget?map00230
Oxidative phosphorylation	ko00190	1 out of 240 0.416666666666667%	906 out of 59392 1.52545797413793%	0.975198	1	MS.gene73382	K00411	https:\\www.genome.jp\dbget-bin\www_bget?map00190
Mismatch repair	ko03430	2 out of 240 0.833333333333333%	1427 out of 59392 2.40268049568966%	0.980009	1	MS.gene67604;novel.13796	K07466+K07466	https:\\www.genome.jp\dbget-bin\www_bget?map03430
DNA replication	ko03030	2 out of 240 0.833333333333333%	1459 out of 59392 2.45655980603448%	0.982151	1	MS.gene67604;novel.13796	K07466+K07466	https:\\www.genome.jp\dbget-bin\www_bget?map03030
Ribosome biogenesis in eukaryotes	ko03008	1 out of 240 0.416666666666667%	1028 out of 59392 1.73087284482759%	0.984989	1	MS.gene60618	K11883	https:\\www.genome.jp\dbget-bin\www_bget?map03008
Plant-pathogen interaction	ko04626	15 out of 240 6.25%	5965 out of 59392 10.0434401939655%	0.985509	1	novel.7082;MS.gene063415;novel.16844;MS.gene049457;MS.gene059916;MS.gene38536;MS.gene004202;MS.gene039765;MS.gene29793;MS.gene49270;MS.gene71511;novel.17466;MS.gene70907;MS.gene026240;MS.gene38396	K02358+K13416+K13416+K13424+K13424+K13424+K13433+K13436+K13448+K13448+K13448+K13448+K13457+K13459+K18875	https:\\www.genome.jp\dbget-bin\www_bget?map04626
Homologous recombination	ko03440	2 out of 240 0.833333333333333%	1892 out of 59392 3.18561422413793%	0.996289	1	MS.gene67604;novel.13796	K07466+K07466	https:\\www.genome.jp\dbget-bin\www_bget?map03440
